# Supplementary material for: Knowledge and Attitudes Towards Vitiligo in Egyptian and Palestinian Communities: A Cross-Sectional Study
Source: Research Square preprint supplement (doi:10.21203/rs.3.rs-5666970/v1), 2025-03-25
Supplement: Supplementary file 1 [file 5d4ae233723788eff4a8be82.docx]

| **Linear Regression Knowledge** |  |  |  |  |  |  |  |
| --- | --- | --- | --- | --- | --- | --- | --- |
|  |  |  |  |  |  |  |  |
| Model Fit Measures | | | | | | |  |
|  | | | **Overall Model Test** | | | |  |
| **Model** | **R** | **R²** | **F** | **df1** | **df2** | **p** |  |
| 1 | 0.549 | 0.302 | 23.2 | 28 | 1506 | <.001 |  |
| *Note.* Models estimated using sample size of N=1535 | | | | | | |  |
|  | | | | | | |  |
|  |  |  |  |  |  |  |  |
|  |  |  |  |  |  |  |  |
|  |  |  |  |  |  |  |  |
| Model Coefficients - Knowledge | | | | | | | |
|  | | | | | | **95% Confidence Interval** | |
| **Predictor** | **Estimate** | **SE** | **t** | **p** | **Stand. Estimate** | **Lower** | **Upper** |
| Interceptᵃ | 7.654 | 0.8442 | 9.0668 | <.001 |  |  |  |
| Atitude | 0.3606 | 0.0262 | 13.7695 | <.001 | 0.32953 | 0.28258 | 0.37647 |
| Sex: |  |  |  |  |  |  |  |
| Male – Female | -0.8161 | 0.1772 | -4.6042 | <.001 | -0.2318 | -0.33055 | -0.13305 |
| Age: |  |  |  |  |  |  |  |
| 26-35 year – 18-25 year | 0.6376 | 0.2707 | 2.3551 | 0.019 | 0.1811 | 0.03027 | 0.33194 |
| 36-50 year – 18-25 year | 0.9948 | 0.3757 | 2.6476 | 0.008 | 0.28257 | 0.07322 | 0.49192 |
| 51< – 18-25 year | 1.8043 | 0.5618 | 3.2115 | 0.001 | 0.51251 | 0.19947 | 0.82555 |
| Status: |  |  |  |  |  |  |  |
| Married – Single | -0.3299 | 0.2914 | -1.1321 | 0.258 | -0.09371 | -0.25608 | 0.06866 |
| Income: |  |  |  |  |  |  |  |
| 6000 > L.E – 6000-12000 L.E | -0.2364 | 0.1727 | -1.3691 | 0.171 | -0.06716 | -0.16339 | 0.02907 |
| 12000 < L.E – 6000-12000 L.E | -0.0865 | 0.2299 | -0.3761 | 0.707 | -0.02456 | -0.15266 | 0.10354 |
| Recedancy: |  |  |  |  |  |  |  |
| Urban – Rural | -0.1634 | 0.1591 | -1.0274 | 0.304 | -0.04642 | -0.13505 | 0.04221 |
| Education: |  |  |  |  |  |  |  |
| ثانوي – ابتدائي | -2.2885 | 0.7823 | -2.9253 | 0.003 | -0.65004 | -1.08592 | -0.21416 |
| جامعة بكالوريوس /دبلوم – ابتدائي | -1.8142 | 0.7644 | -2.3733 | 0.018 | -0.51531 | -0.9412 | -0.08941 |
| شهادات عليا – ابتدائي | -1.343 | 0.8006 | -1.6774 | 0.094 | -0.38148 | -0.82756 | 0.06461 |
| Father's Education: |  |  |  |  |  |  |  |
| ثانوي – ابتدائي | 0.3434 | 0.3025 | 1.1353 | 0.256 | 0.09755 | -0.07099 | 0.26608 |
| جامعة بكالوريوس /دبلوم – ابتدائي | 0.5988 | 0.2999 | 1.9965 | 0.046 | 0.1701 | 0.00298 | 0.33722 |
| شهادات عليا – ابتدائي | -0.0259 | 0.392 | -0.0662 | 0.947 | -0.00737 | -0.22577 | 0.21103 |
| Mother's Education: |  |  |  |  |  |  |  |
| ثانوي – ابتدائي | -0.0911 | 0.2824 | -0.3224 | 0.747 | -0.02586 | -0.18323 | 0.1315 |
| جامعة بكالوريوس /دبلوم – ابتدائي | 0.1563 | 0.2909 | 0.5374 | 0.591 | 0.04441 | -0.11768 | 0.20649 |
| شهادات عليا – ابتدائي | 0.5519 | 0.4406 | 1.2526 | 0.211 | 0.15678 | -0.08873 | 0.40229 |
| Type of work: |  |  |  |  |  |  |  |
| عاطل عن العمل – طالب | 0.2259 | 0.3286 | 0.6874 | 0.492 | 0.06415 | -0.1189 | 0.24721 |
| عامل – طالب | 0.3175 | 0.2186 | 1.4528 | 0.146 | 0.09019 | -0.03158 | 0.21196 |
| متقاعد – طالب | 0.0975 | 0.5179 | 0.1883 | 0.851 | 0.0277 | -0.26085 | 0.31625 |
| مربية منزل – طالب | 0.5593 | 0.3451 | 1.6209 | 0.105 | 0.15888 | -0.03339 | 0.35115 |
| Previous work in medical field: |  |  |  |  |  |  |  |
| نعم – لا | 1.3517 | 0.169 | 7.999 | <.001 | 0.38394 | 0.28979 | 0.47809 |
| Anyone of a family with vitiligo: |  |  |  |  |  |  |  |
| نعم – لا | 0.8837 | 0.3195 | 2.7658 | 0.006 | 0.25101 | 0.07299 | 0.42902 |
| your partner with vitiligo: |  |  |  |  |  |  |  |
| ليس لدي شريك – لا | -0.3333 | 0.1838 | -1.8137 | 0.07 | -0.09468 | -0.19708 | 0.00772 |
| نعم – لا | -0.5807 | 0.4863 | -1.1943 | 0.233 | -0.16495 | -0.43588 | 0.10597 |
| you are with vitiligo: |  |  |  |  |  |  |  |
| نعم – لا | -1.199 | 0.4385 | -2.7344 | 0.006 | -0.34057 | -0.58488 | -0.09626 |
| Do you heard about vitiligo: |  |  |  |  |  |  |  |
| نعم – لا | 3.1792 | 0.3396 | 9.3611 | <.001 | 0.90305 | 0.71382 | 1.09227 |
| ᵃ Represents reference level | | | | | | | |
|  | | | | | | | |
|  |  |  |  |  |  |  |  |
| **Assumption Checks** |  |  |  |  |  |  |  |
|  |  |  |  |  |  |  |  |
| Normality Tests | | |  |  |  |  |  |
|  | **Statistic** | **p** |  |  |  |  |  |
| **Shapiro-Wilk** | 0.963 | <.001 |  |  |  |  |  |
| **Kolmogorov-Smirnov** | 0.0719 | <.001 |  |  |  |  |  |
| **Anderson-Darling** | 15.3 | <.001 |  |  |  |  |  |
| *Note.* Additional results provided by *moretests* | | |  |  |  |  |  |
|  |  |  |  |  |  |  |  |
|  |  |  |  |  |  |  |  |
|  |  |  |  |  |  |  |  |
| Heteroskedasticity Tests | | |  |  |  |  |  |
|  | **Statistic** | **p** |  |  |  |  |  |
| **Breusch-Pagan** | 199 | <.001 |  |  |  |  |  |
| **Goldfeld-Quandt** | 0.846 | 0.989 |  |  |  |  |  |
| **Harrison-McCabe** | 0.542 | 0.99 |  |  |  |  |  |
| *Note.* Additional results provided by *moretests* | | |  |  |  |  |  |
|  |  |  |  |  |  |  |  |
|  |  |  |  |  |  |  |  |
|  |  |  |  |  |  |  |  |
| Collinearity Statistics | | |  |  |  |  |  |
|  | **VIF** | **Tolerance** |  |  |  |  |  |
| **Sex - Transform 1** | 1.04 | 0.958 |  |  |  |  |  |
| **Age - Transform 7** | 1.17 | 0.854 |  |  |  |  |  |
| **Status - Transform 5** | 1.58 | 0.634 |  |  |  |  |  |
| **Income - Transform 8** | 1.04 | 0.965 |  |  |  |  |  |
| **Recedancy - Transform 6** | 1.03 | 0.97 |  |  |  |  |  |
| **Education - Transform 9** | 1.06 | 0.946 |  |  |  |  |  |
| **Father's Education - Transform 9** | 1.2 | 0.831 |  |  |  |  |  |
| **Mother's Education - Transform 9** | 1.21 | 0.827 |  |  |  |  |  |
| **Type of work - Transform 4** | 1.18 | 0.845 |  |  |  |  |  |
| **Previous work in medical field - Transform 2** | 1.1 | 0.91 |  |  |  |  |  |
| **Anyone of a family with vitiligo - Transform 2** | 1.09 | 0.92 |  |  |  |  |  |
| **your partner with vitiligo - Transform 3** | 1.14 | 0.88 |  |  |  |  |  |
| **you are with vitiligo - Transform 2** | 1.18 | 0.845 |  |  |  |  |  |
| **Do you heard about vitiligo - Transform 2** | 1.06 | 0.946 |  |  |  |  |  |
| **Attitude** | 1.11 | 0.901 |  |  |  |  |  |

|  |  |  |  |  |  |  |  |
| --- | --- | --- | --- | --- | --- | --- | --- |
| **Linear Regression Attitude** | |  |  |  |  |  |  |
|  |  |  |  |  |  |  |  |
| Model Fit Measures | | | | | | |  |
|  | | | **Overall Model Test** | | | |  |
| **Model** | **R** | **R²** | **F** | **df1** | **df2** | **p** |  |
| 1 | 0.53 | 0.281 | 21 | 28 | 1506 | <.001 |  |
| *Note.* Models estimated using sample size of N=1535 | | | | | | |  |
|  | | | | | | |  |
|  |  |  |  |  |  |  |  |
|  |  |  |  |  |  |  |  |
|  |  |  |  |  |  |  |  |
| Model Coefficients - Atitude |  |  |  |  |  |  |  |
|  | | | | | | **95% Confidence Interval** |  |
| **Predictor** | **Estimate** | **SE** | **t** | **p** | **Stand. Estimate** | **Lower** | **Upper** |
| Interceptᵃ | -1.7784 | 0.8027 | -2.216 | 0.027 |  |  |  |
| Sex: |  |  |  |  |  |  |  |
| Male – Female | -0.3033 | 0.1653 | -1.834 | 0.067 | -0.0943 | -0.19507 | 0.00653 |
| Age: |  |  |  |  |  |  |  |
| 26-35 year – 18-25 year | -0.7035 | 0.2509 | -2.804 | 0.005 | -0.2187 | -0.3716 | -0.0657 |
| 36-50 year – 18-25 year | -0.0437 | 0.3493 | -0.125 | 0.901 | -0.0136 | -0.22651 | 0.19936 |
| 51< – 18-25 year | -0.4395 | 0.5227 | -0.841 | 0.401 | -0.1366 | -0.45526 | 0.18208 |
| Status: |  |  |  |  |  |  |  |
| Married – Single | -0.192 | 0.2703 | -0.71 | 0.478 | -0.0597 | -0.22449 | 0.10513 |
| Income: |  |  |  |  |  |  |  |
| 6000 > L.E – 6000-12000 L.E | 0.0942 | 0.1603 | 0.588 | 0.557 | 0.0293 | -0.06842 |  |
| 12000 < L.E – 6000-12000 L.E | 0.386 | 0.213 | 1.812 | 0.07 | 0.12 | -0.00988 | 0.12698 |
| Recedancy: |  |  |  |  |  |  | 0.24983 |
| Urban – Rural | 0.3344 | 0.1473 | 2.27 | 0.023 | 0.1039 | 0.01413 |  |
| Education: |  |  |  |  |  |  | 0.19375 |
| ثانوي – ابتدائي | 0.9222 | 0.7272 | 1.268 | 0.205 | 0.2866 | -0.15673 |  |
| جامعة بكالوريوس /دبلوم – ابتدائي | 1.4157 | 0.7093 | 1.996 | 0.046 | 0.44 | 0.00756 | 0.72994 |
| شهادات عليا – ابتدائي | 0.882 | 0.7429 | 1.187 | 0.235 | 0.2741 | -0.17876 | 0.8724 |
| Father's Education: |  |  |  |  |  |  | 0.72701 |
| ثانوي – ابتدائي | -0.3842 | 0.2805 | -1.37 | 0.171 | -0.1194 | -0.29039 |  |
| جامعة بكالوريوس /دبلوم – ابتدائي | -0.1914 | 0.2785 | -0.687 | 0.492 | -0.0595 | -0.22927 | 0.05158 |
| شهادات عليا – ابتدائي | 0.4175 | 0.3634 | 1.149 | 0.251 | 0.1297 | -0.09179 | 0.11031 |
| Mother's Education: |  |  |  |  |  |  | 0.35127 |
| ثانوي – ابتدائي | 0.4974 | 0.2616 | 1.901 | 0.057 | 0.1546 | -0.00491 |  |
| جامعة بكالوريوس /دبلوم – ابتدائي | 0.4456 | 0.2696 | 1.653 | 0.099 | 0.1385 | -0.02585 | 0.3141 |
| شهادات عليا – ابتدائي | 0.3776 | 0.4088 | 0.924 | 0.356 | 0.1174 | -0.13183 | 0.30283 |
| Type of work: |  |  |  |  |  |  | 0.36656 |
| عاطل عن العمل – طالب | 0.0848 | 0.3047 | 0.278 | 0.781 | 0.0263 | -0.15944 |  |
| عامل – طالب | 0.2026 | 0.2028 | 0.999 | 0.318 | 0.063 | -0.06066 | 0.21213 |
| متقاعد – طالب | -0.6848 | 0.48 | -1.427 | 0.154 | -0.2128 | -0.50546 | 0.18657 |
| مربية منزل – طالب | -0.2417 | 0.3203 | -0.755 | 0.451 | -0.0751 | -0.27035 | 0.07978 |
| Previous work in medical field: |  |  |  |  |  |  | 0.12013 |
| نعم – لا | -0.1654 | 0.16 | -1.034 | 0.301 | -0.0514 | -0.14891 |  |
| Anyone of a family with vitiligo: |  |  |  |  |  |  | 0.04611 |
| نعم – لا | 0.4038 | 0.2969 | 1.36 | 0.174 | 0.1255 | -0.05549 |  |
| your partner with vitiligo: |  |  |  |  |  |  | 0.30649 |
| ليس لدي شريك – لا | 0.1259 | 0.1706 | 0.738 | 0.461 | 0.0391 | -0.06487 |  |
| نعم – لا | -0.9863 | 0.4505 | -2.189 | 0.029 | -0.3065 | -0.58115 | 0.14314 |
| you are with vitiligo: |  |  |  |  |  |  | -0.03191 |
| نعم – لا | -2.2492 | 0.4035 | -5.574 | <.001 | -0.699 | -0.94504 |  |
| Do you heard about vitiligo: |  |  |  |  |  |  | -0.45303 |
| نعم – لا | 1.7181 | 0.321 | 5.353 | <.001 | 0.534 | 0.33829 |  |
| Knowledge | 0.3101 | 0.0225 | 13.769 | <.001 | 0.3393 | 0.29099 | 0.72964 |
| ᵃ Represents reference level |  |  |  |  |  |  | 0.38767 |
|  |  |  |  |  |  |  |  |
|  |  |  |  |  |  |  |  |
|  |  |  |  |  |  |  |  |
| **Assumption Checks** |  |  |  |  |  |  |  |
|  |  |  |  |  |  |  |  |
| Normality Tests | | |  |  |  |  |  |
|  | **Statistic** | **p** |  |  |  |  |  |
| **Shapiro-Wilk** | 0.944 | <.001 |  |  |  |  |  |
| **Kolmogorov-Smirnov** | 0.0788 | <.001 |  |  |  |  |  |
| **Anderson-Darling** | 23.4 | <.001 |  |  |  |  |  |
| *Note.* Additional results provided by *moretests* | | |  |  |  |  |  |
|  |  |  |  |  |  |  |  |
|  |  |  |  |  |  |  |  |
|  |  |  |  |  |  |  |  |
| Heteroskedasticity Tests | | |  |  |  |  |  |
|  | **Statistic** | **p** |  |  |  |  |  |
| **Breusch-Pagan** | 89.1 | <.001 |  |  |  |  |  |
| **Goldfeld-Quandt** | 0.958 | 0.719 |  |  |  |  |  |
| **Harrison-McCabe** | 0.518 | 0.84 |  |  |  |  |  |
| *Note.* Additional results provided by *moretests* | | |  |  |  |  |  |
|  |  |  |  |  |  |  |  |
|  |  |  |  |  |  |  |  |
|  |  |  |  |  |  |  |  |
| Collinearity Statistics | | |  |  |  |  |  |
|  | **VIF** | **Tolerance** |  |  |  |  |  |
| **Sex - Transform 1** | NaN | NaN |  |  |  |  |  |
| **Age - Transform 7** | NaN | NaN |  |  |  |  |  |
| **Status - Transform 5** | NaN | NaN |  |  |  |  |  |
| **Income - Transform 8** | NaN | NaN |  |  |  |  |  |
| **Recedancy - Transform 6** | NaN | NaN |  |  |  |  |  |
| **Education - Transform 9** | NaN | NaN |  |  |  |  |  |
| **Father's Education - Transform 9** | NaN | NaN |  |  |  |  |  |
| **Age** | NaN | NaN |  |  |  |  |  |
| **Mother's Education - Transform 9** | NaN | NaN |  |  |  |  |  |
| **Type of work - Transform 4** | NaN | NaN |  |  |  |  |  |
| **Previous work in medical field - Transform 2** | NaN | NaN |  |  |  |  |  |
| **Anyone of a family with vitiligo - Transform 2** | NaN | NaN |  |  |  |  |  |
| **your partner with vitiligo - Transform 3** | NaN | NaN |  |  |  |  |  |
| **you are with vitiligo - Transform 2** | NaN | NaN |  |  |  |  |  |
| **Do you heard about vitiligo - Transform 2** | NaN | NaN |  |  |  |  |  |
| **Knowledge** | NaN | NaN |  |  |  |  |  |
| *Note.* Linear model contains aliased coefficients (singular fit) | | |  |  |  |  |  |

**Descriptives**

| Descriptives | | | | |
| --- | --- | --- | --- | --- |
|  | | | **Shapiro-Wilk** | |
|  | **N** | **Missing** | **W** | **p** |
| **Sex** | 1535 | 0 | 0.561 | <.001 |
| **Age** | 1535 | 0 | 0.579 | <.001 |
| **Status** | 1535 | 0 | 0.530 | <.001 |
| **Income** | 1535 | 0 | 0.792 | <.001 |
| **Recedancy** | 1535 | 0 | 0.625 | <.001 |
| **Education** | 1535 | 0 | 0.622 | <.001 |
| **Father's Education** | 1535 | 0 | 0.831 | <.001 |
| **Mother's Education** | 1535 | 0 | 0.825 | <.001 |
| **Type of work** | 1535 | 0 | 0.802 | <.001 |
| **Previous work in medical field** | 1535 | 0 | 0.626 | <.001 |
| **Anyone of a family with vitiligo** | 1535 | 0 | 0.281 | <.001 |
| **your partner with vitiligo** | 1535 | 0 | 0.705 | <.001 |
| **you are with vitiligo** | 1535 | 0 | 0.209 | <.001 |
| **Attitude** | 1535 | 0 | 0.853 | <.001 |
| **Knowledge** | 1535 | 0 | 0.887 | <.001 |

|  |  |  |  |  |  |  |  |  |  |  |
| --- | --- | --- | --- | --- | --- | --- | --- | --- | --- | --- |
|  | **Knwoledge** | | | | | **Atitude** | | | | |
|  |  | Frequency | Percent |  |  |  | Frequency | Percent |  |  |
|  | 0 | 25 | 1.6 |  |  | -8 | 3 | 0.2 |  |  |
|  | 1 | 18 | 1.2 |  |  | -7 | 2 | 0.1 |  |  |
|  | 2 | 13 | 0.8 |  |  | -6 | 8 | 0.5 |  |  |
|  | 3 | 16 | 1.0 |  |  | -5 | 5 | 0.3 |  |  |
|  | 4 | 13 | 0.8 |  |  | -4 | 22 | 1.4 |  |  |
|  | 5 | 32 | 2.1 |  |  | -3 | 21 | 1.4 |  |  |
|  | 6 | 21 | 1.4 |  |  | -2 | 27 | 1.8 |  |  |
|  | 7 | 45 | 2.9 |  |  | -1 | 24 | 1.6 |  |  |
|  | 8 | 49 | 3.2 |  |  | 0 | 78 | 5.1 |  |  |
|  | 9 | 76 | 5.0 |  |  | 1 | 37 | 2.4 |  |  |
|  | 10 | 106 | 6.9 |  |  | 2 | 73 | 4.8 |  |  |
|  | 11 | 157 | 10.2 |  |  | 3 | 71 | 4.6 |  |  |
|  | 12 | 216 | 14.1 |  |  | 4 | 161 | 10.5 |  |  |
|  | 13 | 252 | 16.4 |  |  | 5 | 164 | 10.7 |  |  |
|  | 14 | 234 | 15.2 |  |  | 6 | 291 | 19.0 |  |  |
|  | 15 | 160 | 10.4 |  |  | 7 | 110 | 7.2 |  |  |
|  | 16 | 75 | 4.9 |  |  | 8 | 438 | 28.5 |  |  |
|  | 17 | 23 | 1.5 |  |  | Total | 1535 | 100.0 |  |  |
|  | 18 | 4 | 0.3 |  |  |  |  |  |  |  |
|  | Total | 1535 | 100.0 |  |  |  |  |  |  |  |
|  |  |  |  |  |  |  |  |  |  |  |
|  |  |  |  |  |  |  |  |  |  |  |
|  | **Descriptives** | |  |  |  |  |  |  |  |  |
|  |  |  |  |  |  |  |  |  |  |  |
|  | Descriptives | | | | | | | |  |  |
|  |  | **N** | **Missing** | **Mean** | **Median** | **SD** |  |  |  |  |
|  | Knowledge | 1535 | 0 | 11.61 | 12 | 3.52 |  |  |  |  |
|  | Atitude | 1535 | 0 | 4.91 | 6 | 3.22 |  |  |  |  |
|  |  | | | | | | | |  |  |
|  |  |  |  |  |  |  |  |  |  |  |
|  |  |  |  |  |  |  |  |  |  |  |
|  |  |  |  |  |  |  |  |  |  |  |
| Table x: Response of the participants to attitude questions about vitiligo(n x). | | | | | | | | | |  |
| I would hire a vitiligo patient (%) | | | | | | |  |  |  |  |
|  |  |  |  |  |  | No | 91 ( 5.9) |  |  |  |
|  |  |  |  |  |  | Yes | 1286 ( 83.8) |  |  |  |
| I would shake hands with a vitiligo patient (%) | | | | | | | |  |  |  |
|  |  |  |  |  |  | No | 88 ( 5.7) |  |  |  |
|  |  |  |  |  |  | Yes | 1339 ( 87.2) |  |  |  |
| I would become a friend with a vitiligo patient (%) | | | | | | | |  |  |  |
|  |  |  |  |  |  | No | 68 ( 4.4) |  |  |  |
|  |  |  |  |  |  | Yes | 1348 ( 87.8) |  |  |  |
| I would eat food prepared by a vitiligo patient (%) | | | | | | | |  |  |  |
|  |  |  |  |  |  | No | 115 ( 7.5) |  |  |  |
|  |  |  |  |  |  | Yes | 1243 ( 81.0) |  |  |  |
| I would marry a vitiligo patient (%) | | | | | | |  |  |  |  |
|  |  |  |  |  |  | No | 373 ( 24.3) |  |  |  |
|  |  |  |  |  |  | Yes | 598 ( 39.0) |  |  |  |
| I would marry a family member who has vitiligo (%) | | | | | | | |  |  |  |
|  |  |  |  |  |  | No | 354 ( 23.1) |  |  |  |
|  |  |  |  |  |  | Yes | 645 ( 42.0) |  |  |  |
| My intimate relationship would be affected by my partners’ vitiligo diagnosis (%) | | | | | | | |  |  |  |
|  |  |  |  |  |  | No | 1049 ( 68.3) |  |  |  |
|  |  |  |  |  |  | Yes | 152 ( 9.9) |  |  |  |
| I would want to divorce if my partner got diagnosed with vitiligo (%) | | | | | | | |  |  |  |
|  |  |  |  |  |  | No | 1343 ( 87.5) |  |  |  |
|  |  |  |  |  |  | Yes | 70 ( 4.6) |  |  |  |
|  |  |  |  |  |  |  |  |  |  |  |
|  |  |  |  |  |  |  |  |  |  |  |
|  |  |  |  |  |  |  |  |  |  |  |
|  |  |  |  |  |  |  |  |  |  |  |
|  |  |  |  |  |  |  |  |  |  |  |
|  |  | Binomial Test |  |  |  |  |  |  |  |  |
|  |  |  | **Level** | **Count** | **Proportion** |  |  |  |  |  |
|  |  | vitiligo affects the skin “YES” | May be | 209 | 0.136 |  |  |  |  |  |
|  |  | No | 71 | 0.046 |  |  |  |  |  |
|  |  | Yes | 1255 | 0.818 |  |  |  |  |  |
|  |  | Vitiligo is a disease of the immune system“YES” | May be | 455 | 0.296 |  |  |  |  |  |
|  |  | No | 320 | 0.208 |  |  |  |  |  |
|  |  | Yes | 760 | 0.495 |  |  |  |  |  |
|  |  | vitiligo affects the social life of patients “YES” | May be | 504 | 0.328 |  |  |  |  |  |
|  |  | No | 547 | 0.356 |  |  |  |  |  |
|  |  | Yes | 484 | 0.315 |  |  |  |  |  |
|  |  | Vitiligo is more prevalent and exaggerated with exposure to psychological stress“YES” | May be | 606 | 0.395 |  |  |  |  |  |
|  |  | No | 389 | 0.253 |  |  |  |  |  |
|  |  | Yes | 540 | 0.352 |  |  |  |  |  |
|  |  | you think there is a lack of awareness regarding vitiligo and its treatment “YES” | May be | 173 | 0.113 |  |  |  |  |  |
|  |  | No | 91 | 0.059 |  |  |  |  |  |
|  |  | Yes | 1271 | 0.828 |  |  |  |  |  |
|  |  | vitiligo Is contagious “NO” | May be | 164 | 0.107 |  |  |  |  |  |
|  |  | No | 1280 | 0.834 |  |  |  |  |  |
|  |  | Yes | 91 | 0.059 |  |  |  |  |  |
|  |  | vitiligo is a infectious disease “NO” | May be | 159 | 0.104 |  |  |  |  |  |
|  |  | No | 1333 | 0.868 |  |  |  |  |  |
|  |  | Yes | 43 | 0.028 |  |  |  |  |  |
|  |  | vitiligo Is transmitted through touching and sharing objects with the patient “NO” | May be | 203 | 0.132 |  |  |  |  |  |
|  |  | No | 1242 | 0.809 |  |  |  |  |  |
|  |  | Yes | 90 | 0.059 |  |  |  |  |  |
|  |  | Vitiligo contagious by sharing things“NO” | May be | 170 | 0.111 |  |  |  |  |  |
|  |  | No | 1311 | 0.854 |  |  |  |  |  |
|  |  | Yes | 54 | 0.035 |  |  |  |  |  |
|  |  | Vitiligo caused by lack of hygiene“NO” | May be | 227 | 0.148 |  |  |  |  |  |
|  |  | No | 1212 | 0.79 |  |  |  |  |  |
|  |  | Yes | 96 | 0.063 |  |  |  |  |  |
|  |  | vitiligo affects internal organs “NO” | May be | 608 | 0.396 |  |  |  |  |  |
|  |  | No | 657 | 0.428 |  |  |  |  |  |
|  |  | Yes | 270 | 0.176 |  |  |  |  |  |
|  |  | Vitiligo is associated with the habitual intake of certainfoods“NO” | May be | 293 | 0.191 |  |  |  |  |  |
|  |  | No | 1164 | 0.758 |  |  |  |  |  |
|  |  | Yes | 78 | 0.051 |  |  |  |  |  |
|  |  | Vitiligo is a hereditary disease“NO” | May be | 630 | 0.41 |  |  |  |  |  |
|  |  | No | 454 | 0.296 |  |  |  |  |  |
|  |  | Yes | 451 | 0.294 |  |  |  |  |  |
|  |  | vitiligo Is caused by contaminated foods “NO” | May be | 311 | 0.203 |  |  |  |  |  |
|  |  | No | 1170 | 0.762 |  |  |  |  |  |
|  |  | Yes | 54 | 0.035 |  |  |  |  |  |
|  |  | vitiligo causes skin cancer “NO” | May be | 640 | 0.417 |  |  |  |  |  |
|  |  | No | 739 | 0.481 |  |  |  |  |  |
|  |  | Yes | 156 | 0.102 |  |  |  |  |  |
|  |  | vitiligo Is triggered by magic or witchery “NO” | May be | 227 | 0.148 |  |  |  |  |  |
|  |  | No | 1238 | 0.807 |  |  |  |  |  |
|  |  | Yes | 70 | 0.046 |  |  |  |  |  |
|  |  | vitiligo leads to death “NO” | May be | 184 | 0.12 |  |  |  |  |  |
|  |  | No | 1299 | 0.846 |  |  |  |  |  |
|  |  | Yes | 52 | 0.034 |  |  |  |  |  |
|  |  | There is a treatment for vitiligo“NO” | May be | 676 | 0.44 |  |  |  |  |  |
|  |  | No | 453 | 0.295 |  |  |  |  |  |
|  |  | Yes | 406 | 0.264 |  |  |  |  |  |
