# Supplementary material for: Knowledge and Attitudes Towards Vitiligo in Egyptian and Palestinian Communities: A Cross-Sectional Study
Source: Research Square preprint supplement (doi:10.21203/rs.3.rs-5666970/v1), 2025-03-25
Supplement: Supplementary file 2 [file eeead3777d020e7d2ae700dc.xlsx]

## Sheet: Form Responses 1
Sex	Age	Status	Income	Recedancy	Education	Father's Education	Mother's Education	Type of work	Previous work in medical field	Anyone of a family with vitiligo	your partner with vitiligo	you are with vitiligo	Do you heard about vitiligo	If yes, where you heard	vitiligo affects the skin “YES”	Vitiligo is a disease of the immune system“YES”	vitiligo affects the social life of patients “YES”	Vitiligo is more prevalent and exaggerated with exposure to psychological stress“YES”	you think there is a lack of awareness regarding vitiligo and its treatment “YES”	vitiligo Is contagious “NO”	vitiligo is a infectious disease “NO”	vitiligo Is transmitted through touching and sharing objects with the patient “NO”	Vitiligo contagious by sharing things“NO”	Vitiligo caused by lack of hygiene“NO”	vitiligo affects internal organs “NO”	Vitiligo is associated with the habitual intake of certainfoods“NO”	Vitiligo is a hereditary disease“NO”	vitiligo Is caused by contaminated foods “NO”	vitiligo causes skin cancer “NO”	vitiligo Is triggered by magic or witchery “NO”	vitiligo leads to death “NO”	There is a treatment for vitiligo“YES”	I would hire a vitiligo patient	I would shake hands with a vitiligo patient	I would become a friend with a vitiligo patient	I would eat food prepared by a vitiligo patient	I would marry a vitiligo patient	I would marry a family member who has vitiligo	My intimate relationship would be affected by my partners’ vitiligo diagnosis	I would want to divorce if my partner got diagnosed with vitiligo
أنثى	18-25 سنة	أعزب\عزباء	6000-12000 جنيه مصري	ريف	جامعة بكالوريوس /دبلوم	جامعة بكالوريوس /دبلوم	جامعة بكالوريوس /دبلوم	عامل	نعم	لا	ليس لدي شريك	لا	نعم	الإنترنت	نعم	نعم	نعم	نعم	نعم	لا	لا	لا	لا	لا	لا	لا	لا	لا	لا	لا	لا	نعم	نعم	نعم	نعم	نعم	نعم	نعم	لا	لا
ذكر	26-35 سنة	أعزب\عزباء	أقل من 6000 جنيه مصري	ريف	جامعة بكالوريوس /دبلوم	جامعة بكالوريوس /دبلوم	جامعة بكالوريوس /دبلوم	عامل	نعم	لا	ليس لدي شريك	لا	نعم	الصحف - الكتب - المجلات	نعم	نعم	نعم	نعم	نعم	لا	لا	لا	لا	لا	ربما	لا	ربما	لا	لا	لا	لا	ربما	ربما	نعم	نعم	نعم	لا	لا	ربما	ربما
ذكر	18-25 سنة	أعزب\عزباء	أقل من 6000 جنيه مصري	ريف	جامعة بكالوريوس /دبلوم	جامعة بكالوريوس /دبلوم	جامعة بكالوريوس /دبلوم	طالب	نعم	لا	ليس لدي شريك	لا	نعم	الإنترنت, التلفاز, المدرسة, الأهل, الأصدقاء	نعم	نعم	لا	ربما	نعم	لا	لا	لا	لا	نعم	نعم	لا	نعم	لا	ربما	لا	ربما	نعم	نعم	نعم	نعم	نعم	نعم	نعم	ربما	ربما
أنثى	18-25 سنة	أعزب\عزباء	أكثر من 12000 جنيه مصري	ريف	جامعة بكالوريوس /دبلوم	جامعة بكالوريوس /دبلوم	جامعة بكالوريوس /دبلوم	طالب	نعم	لا	لا	لا	نعم	الإنترنت, التلفاز, الأهل, الأصدقاء, أخرى	نعم	نعم	نعم	ربما	نعم	ربما	لا	ربما	ربما	ربما	ربما	ربما	ربما	ربما	ربما	لا	لا	ربما	ربما	ربما	نعم	لا	لا	لا	ربما	لا
أنثى	18-25 سنة	أعزب\عزباء	أقل من 6000 جنيه مصري	ريف	جامعة بكالوريوس /دبلوم	جامعة بكالوريوس /دبلوم	جامعة بكالوريوس /دبلوم	طالب	نعم	لا	لا	لا	نعم	التلفاز, الأصدقاء, أخرى	نعم	لا	ربما	لا	نعم	لا	لا	لا	لا	لا	لا	لا	ربما	لا	لا	لا	لا	ربما	نعم	نعم	نعم	نعم	نعم	نعم	لا	لا
ذكر	26-35 سنة	أعزب\عزباء	6000-12000 جنيه مصري	مدينة	جامعة بكالوريوس /دبلوم	جامعة بكالوريوس /دبلوم	جامعة بكالوريوس /دبلوم	عامل	نعم	لا	لا	لا	نعم	الإنترنت, الأهل, الأصدقاء	ربما	ربما	ربما	ربما	ربما	ربما	ربما	ربما	ربما	ربما	ربما	ربما	ربما	ربما	ربما	ربما	ربما	ربما	لا	ربما	نعم	ربما	ربما	ربما	ربما	ربما
ذكر	26-35 سنة	أعزب\عزباء	أقل من 6000 جنيه مصري	مدينة	شهادات عليا	جامعة بكالوريوس /دبلوم	جامعة بكالوريوس /دبلوم	عامل	نعم	لا	لا	لا	نعم	الإنترنت, الطبيب	نعم	نعم	نعم	لا	نعم	لا	لا	لا	لا	لا	نعم	لا	نعم	لا	لا	لا	لا	نعم	نعم	نعم	نعم	نعم	ربما	ربما	ربما	لا
أنثى	18-25 سنة	أعزب\عزباء	أكثر من 12000 جنيه مصري	مدينة	جامعة بكالوريوس /دبلوم	شهادات عليا	جامعة بكالوريوس /دبلوم	طالب	نعم	لا	ليس لدي شريك	لا	نعم	الأهل, الأصدقاء	نعم	لا	ربما	ربما	نعم	لا	لا	لا	لا	لا	لا	لا	ربما	لا	ربما	لا	لا	ربما	نعم	نعم	نعم	نعم	نعم	نعم	لا	لا
ذكر	26-35 سنة	أعزب\عزباء	6000-12000 جنيه مصري	مدينة	شهادات عليا	شهادات عليا	شهادات عليا	عامل	نعم	لا	لا	لا	نعم	أخرى	نعم	نعم	لا	نعم	نعم	نعم	لا	نعم	لا	نعم	لا	لا	لا	لا	لا	لا	لا	نعم	نعم	نعم	نعم	نعم	نعم	نعم	لا	لا
ذكر	26-35 سنة	متزوج/ة	6000-12000 جنيه مصري	ريف	شهادات عليا	ثانوي	ثانوي	عامل	نعم	لا	لا	لا	نعم	الأصدقاء, الطبيب	ربما	نعم	نعم	نعم	نعم	لا	لا	لا	لا	لا	لا	لا	لا	لا	نعم	لا	لا	نعم	نعم	نعم	ربما	نعم	ربما	ربما	ربما	لا
أنثى	18-25 سنة	أعزب\عزباء	أقل من 6000 جنيه مصري	ريف	جامعة بكالوريوس /دبلوم	جامعة بكالوريوس /دبلوم	جامعة بكالوريوس /دبلوم	طالب	نعم	لا	ليس لدي شريك	لا	نعم	الإنترنت	نعم	نعم	نعم	ربما	نعم	ربما	لا	ربما	ربما	لا	نعم	ربما	نعم	نعم	نعم	لا	لا	ربما	ربما	ربما	ربما	ربما	لا	لا	لا	لا
أنثى	26-35 سنة	أعزب\عزباء	6000-12000 جنيه مصري	مدينة	جامعة بكالوريوس /دبلوم	جامعة بكالوريوس /دبلوم	جامعة بكالوريوس /دبلوم	عامل	لا	لا	ليس لدي شريك	لا	نعم	الإنترنت	ربما	نعم	لا	ربما	نعم	لا	لا	لا	لا	لا	نعم	لا	ربما	لا	لا	ربما	لا	ربما	نعم	نعم	نعم	نعم	نعم	نعم	لا	لا
ذكر	26-35 سنة	متزوج/ة	أقل من 6000 جنيه مصري	ريف	جامعة بكالوريوس /دبلوم	ثانوي	ثانوي	عامل	لا	لا	لا	لا	نعم	التلفاز	نعم	ربما	ربما	ربما	ربما	ربما	ربما	ربما	ربما	نعم	ربما	ربما	ربما	لا	ربما	ربما	ربما	ربما	لا	لا	لا	لا	لا	لا	لا	لا
ذكر	26-35 سنة	أعزب\عزباء	أكثر من 12000 جنيه مصري	ريف	شهادات عليا	ثانوي	ثانوي	متقاعد	نعم	لا	ليس لدي شريك	لا	نعم	أخرى	نعم	نعم	نعم	لا	نعم	لا	لا	لا	لا	لا	نعم	لا	لا	لا	لا	لا	لا	ربما	نعم	نعم	نعم	نعم	ربما	ربما	ربما	لا
أنثى	18-25 سنة	أعزب\عزباء	6000-12000 جنيه مصري	ريف	جامعة بكالوريوس /دبلوم	جامعة بكالوريوس /دبلوم	ابتدائي	طالب	نعم	لا	ليس لدي شريك	لا	نعم	المدرسة, الصحف - الكتب - المجلات	نعم	ربما	لا	لا	نعم	لا	لا	لا	لا	لا	نعم	لا	نعم	لا	ربما	ربما	لا	ربما	نعم	نعم	نعم	نعم	ربما	ربما	لا	لا
أنثى	18-25 سنة	أعزب\عزباء	6000-12000 جنيه مصري	مدينة	جامعة بكالوريوس /دبلوم	جامعة بكالوريوس /دبلوم	جامعة بكالوريوس /دبلوم	طالب	نعم	لا	لا	لا	نعم	الإنترنت	نعم	ربما	نعم	نعم	نعم	لا	لا	لا	لا	لا	نعم	ربما	ربما	ربما	لا	لا	لا	لا	ربما	نعم	نعم	نعم	نعم	نعم	لا	لا
أنثى	18-25 سنة	أعزب\عزباء	6000-12000 جنيه مصري	ريف	جامعة بكالوريوس /دبلوم	جامعة بكالوريوس /دبلوم	جامعة بكالوريوس /دبلوم	طالب	نعم	لا	ليس لدي شريك	لا	نعم	الإنترنت, التلفاز	نعم	نعم	ربما	ربما	نعم	لا	لا	لا	لا	لا	نعم	لا	نعم	لا	لا	لا	لا	ربما	نعم	نعم	نعم	نعم	نعم	ربما	ربما	لا
ذكر	26-35 سنة	أعزب\عزباء	6000-12000 جنيه مصري	ريف	جامعة بكالوريوس /دبلوم	جامعة بكالوريوس /دبلوم	جامعة بكالوريوس /دبلوم	عامل	نعم	لا	ليس لدي شريك	لا	نعم	الإنترنت, التلفاز, الأهل, الأصدقاء, الطبيب	نعم	ربما	نعم	ربما	نعم	لا	لا	لا	لا	ربما	ربما	ربما	ربما	ربما	لا	لا	لا	ربما	نعم	نعم	نعم	نعم	ربما	ربما	نعم	لا
ذكر	18-25 سنة	أعزب\عزباء	أقل من 6000 جنيه مصري	ريف	جامعة بكالوريوس /دبلوم	جامعة بكالوريوس /دبلوم	جامعة بكالوريوس /دبلوم	طالب	لا	لا	ليس لدي شريك	لا	نعم	الإنترنت	ربما	ربما	ربما	ربما	ربما	ربما	ربما	ربما	ربما	ربما	ربما	ربما	ربما	ربما	ربما	ربما	ربما	ربما	ربما	ربما	ربما	ربما	ربما	ربما	ربما	ربما
ذكر	26-35 سنة	أعزب\عزباء	6000-12000 جنيه مصري	ريف	جامعة بكالوريوس /دبلوم	جامعة بكالوريوس /دبلوم	ثانوي	عامل	لا	لا	لا	لا	نعم	التلفاز	نعم	ربما	لا	ربما	نعم	لا	لا	لا	لا	لا	لا	نعم	ربما	ربما	ربما	لا	لا	نعم	نعم	نعم	نعم	نعم	نعم	نعم	لا	لا
ذكر	26-35 سنة	أعزب\عزباء	6000-12000 جنيه مصري	ريف	جامعة بكالوريوس /دبلوم	جامعة بكالوريوس /دبلوم	ثانوي	عامل	نعم	لا	لا	لا	نعم	الإنترنت, الأصدقاء, أخرى	نعم	نعم	لا	نعم	نعم	لا	لا	لا	لا	لا	لا	لا	لا	لا	لا	لا	لا	نعم	نعم	نعم	نعم	نعم	ربما	ربما	لا	لا
ذكر	18-25 سنة	أعزب\عزباء	6000-12000 جنيه مصري	ريف	جامعة بكالوريوس /دبلوم	جامعة بكالوريوس /دبلوم	جامعة بكالوريوس /دبلوم	طالب	نعم	لا	ليس لدي شريك	لا	نعم	الإنترنت, أخرى	نعم	نعم	لا	لا	ربما	لا	لا	لا	لا	لا	لا	لا	ربما	لا	لا	لا	لا	ربما	نعم	نعم	نعم	نعم	ربما	نعم	لا	لا
ذكر	26-35 سنة	أعزب\عزباء	6000-12000 جنيه مصري	مدينة	جامعة بكالوريوس /دبلوم	جامعة بكالوريوس /دبلوم	جامعة بكالوريوس /دبلوم	عامل	نعم	لا	لا	لا	نعم	الإنترنت, الأصدقاء, الطبيب	نعم	لا	لا	لا	نعم	لا	لا	لا	لا	لا	لا	لا	لا	لا	لا	لا	لا	نعم	نعم	نعم	نعم	نعم	نعم	نعم	لا	لا
ذكر	18-25 سنة	أعزب\عزباء	أكثر من 12000 جنيه مصري	مدينة	جامعة بكالوريوس /دبلوم	شهادات عليا	شهادات عليا	طالب	نعم	لا	ليس لدي شريك	لا	نعم	الأصدقاء	نعم	نعم	لا	ربما	لا	لا	لا	لا	لا	لا	نعم	ربما	ربما	لا	ربما	لا	لا	لا	نعم	نعم	نعم	نعم	نعم	نعم	ربما	لا
ذكر	36-50 سنة	متزوج/ة	6000-12000 جنيه مصري	مدينة	جامعة بكالوريوس /دبلوم	ابتدائي	ابتدائي	عامل	لا	لا	لا	لا	نعم	الإنترنت, التلفاز, الأصدقاء, الصحف - الكتب - المجلات	نعم	ربما	ربما	ربما	ربما	ربما	ربما	ربما	ربما	ربما	ربما	ربما	ربما	ربما	ربما	ربما	ربما	ربما	نعم	نعم	نعم	نعم	لا	لا	ربما	لا
أنثى	18-25 سنة	أعزب\عزباء	6000-12000 جنيه مصري	ريف	جامعة بكالوريوس /دبلوم	ثانوي	ثانوي	طالب	نعم	لا	لا	لا	نعم	الإنترنت, التلفاز, الطبيب, أخرى	نعم	نعم	لا	ربما	نعم	لا	لا	لا	لا	ربما	ربما	ربما	ربما	ربما	ربما	لا	لا	ربما	نعم	نعم	نعم	نعم	نعم	نعم	لا	لا
أنثى	18-25 سنة	أعزب\عزباء	أكثر من 12000 جنيه مصري	مدينة	جامعة بكالوريوس /دبلوم	جامعة بكالوريوس /دبلوم	جامعة بكالوريوس /دبلوم	عامل	لا	لا	لا	لا	نعم	الإنترنت, التلفاز, المدرسة, الأهل, الأصدقاء, الصحف - الكتب - المجلات	نعم	نعم	ربما	لا	نعم	لا	لا	لا	لا	لا	لا	لا	نعم	لا	لا	لا	لا	لا	نعم	نعم	نعم	نعم	نعم	نعم	لا	لا
أنثى	18-25 سنة	متزوج/ة	أقل من 6000 جنيه مصري	مدينة	جامعة بكالوريوس /دبلوم	جامعة بكالوريوس /دبلوم	ثانوي	مربية منزل	لا	لا	لا	لا	نعم	الأهل	ربما	ربما	نعم	ربما	نعم	ربما	لا	ربما	لا	ربما	ربما	ربما	ربما	ربما	لا	لا	لا	لا	نعم	نعم	نعم	ربما	ربما	ربما	ربما	لا
ذكر	18-25 سنة	أعزب\عزباء	6000-12000 جنيه مصري	مدينة	ثانوي	جامعة بكالوريوس /دبلوم	ثانوي	طالب	لا	لا	ليس لدي شريك	لا	لا	الإنترنت	نعم	ربما	لا	نعم	نعم	نعم	ربما	نعم	ربما	نعم	ربما	ربما	ربما	ربما	ربما	لا	لا	نعم	ربما	لا	نعم	لا	لا	لا	نعم	ربما
أنثى	18-25 سنة	أعزب\عزباء	6000-12000 جنيه مصري	مدينة	جامعة بكالوريوس /دبلوم	شهادات عليا	جامعة بكالوريوس /دبلوم	طالب	نعم	لا	ليس لدي شريك	لا	نعم	الإنترنت	نعم	ربما	لا	ربما	نعم	لا	ربما	لا	لا	لا	ربما	لا	ربما	ربما	ربما	لا	لا	ربما	نعم	نعم	نعم	نعم	ربما	ربما	ربما	لا
أنثى	18-25 سنة	أعزب\عزباء	أقل من 6000 جنيه مصري	ريف	جامعة بكالوريوس /دبلوم	ابتدائي	ثانوي	طالب	نعم	لا	ليس لدي شريك	لا	نعم	الأهل, الأصدقاء	نعم	لا	لا	نعم	نعم	لا	لا	لا	لا	لا	لا	لا	لا	لا	لا	لا	لا	لا	نعم	نعم	نعم	نعم	نعم	نعم	لا	لا
أنثى	18-25 سنة	أعزب\عزباء	أقل من 6000 جنيه مصري	ريف	جامعة بكالوريوس /دبلوم	جامعة بكالوريوس /دبلوم	جامعة بكالوريوس /دبلوم	طالب	نعم	لا	لا	لا	نعم	الإنترنت, التلفاز	نعم	لا	لا	ربما	نعم	لا	لا	لا	لا	لا	لا	لا	ربما	لا	لا	لا	لا	ربما	نعم	نعم	نعم	نعم	نعم	نعم	لا	لا
أنثى	18-25 سنة	أعزب\عزباء	أقل من 6000 جنيه مصري	ريف	جامعة بكالوريوس /دبلوم	شهادات عليا	جامعة بكالوريوس /دبلوم	عاطل عن العمل	نعم	لا	ليس لدي شريك	لا	نعم	الإنترنت	نعم	ربما	لا	ربما	نعم	لا	لا	لا	لا	ربما	لا	ربما	ربما	ربما	ربما	لا	لا	ربما	نعم	نعم	نعم	نعم	نعم	نعم	لا	لا
أنثى	18-25 سنة	أعزب\عزباء	أكثر من 12000 جنيه مصري	مدينة	جامعة بكالوريوس /دبلوم	جامعة بكالوريوس /دبلوم	جامعة بكالوريوس /دبلوم	عامل	نعم	لا	لا	لا	نعم	الإنترنت, الصحف - الكتب - المجلات, الطبيب	نعم	نعم	لا	لا	نعم	لا	لا	لا	لا	لا	لا	لا	لا	لا	لا	لا	لا	لا	نعم	نعم	نعم	نعم	نعم	نعم	لا	لا
أنثى	18-25 سنة	أعزب\عزباء	6000-12000 جنيه مصري	ريف	جامعة بكالوريوس /دبلوم	جامعة بكالوريوس /دبلوم	جامعة بكالوريوس /دبلوم	طالب	لا	لا	لا	لا	نعم	الإنترنت, أخرى	ربما	ربما	ربما	ربما	ربما	ربما	ربما	ربما	ربما	لا	ربما	ربما	ربما	ربما	ربما	ربما	ربما	نعم	ربما	ربما	ربما	ربما	لا	لا	ربما	ربما
أنثى	18-25 سنة	أعزب\عزباء	أقل من 6000 جنيه مصري	مدينة	جامعة بكالوريوس /دبلوم	جامعة بكالوريوس /دبلوم	جامعة بكالوريوس /دبلوم	طالب	لا	نعم	ليس لدي شريك	لا	نعم	الأهل	نعم	ربما	نعم	لا	نعم	لا	لا	لا	لا	لا	ربما	ربما	لا	ربما	ربما	لا	لا	نعم	لا	لا	لا	لا	لا	لا	ربما	لا
أنثى	18-25 سنة	أعزب\عزباء	أقل من 6000 جنيه مصري	مدينة	جامعة بكالوريوس /دبلوم	جامعة بكالوريوس /دبلوم	جامعة بكالوريوس /دبلوم	عامل	نعم	لا	ليس لدي شريك	لا	نعم	الطبيب	نعم	نعم	نعم	نعم	ربما	لا	لا	لا	لا	لا	نعم	لا	لا	لا	لا	لا	لا	نعم	نعم	نعم	نعم	نعم	لا	لا	ربما	لا
أنثى	26-35 سنة	أعزب\عزباء	أقل من 6000 جنيه مصري	مدينة	جامعة بكالوريوس /دبلوم	جامعة بكالوريوس /دبلوم	جامعة بكالوريوس /دبلوم	عامل	نعم	لا	ليس لدي شريك	لا	نعم	المدرسة	نعم	نعم	ربما	ربما	نعم	لا	لا	لا	لا	لا	نعم	لا	ربما	لا	ربما	لا	ربما	ربما	نعم	نعم	نعم	نعم	ربما	ربما	لا	لا
أنثى	18-25 سنة	أعزب\عزباء	أقل من 6000 جنيه مصري	مدينة	جامعة بكالوريوس /دبلوم	ثانوي	ثانوي	عامل	نعم	لا	ليس لدي شريك	لا	نعم	الإنترنت, التلفاز	نعم	نعم	ربما	نعم	ربما	لا	لا	لا	لا	لا	لا	لا	لا	لا	لا	لا	لا	لا	نعم	نعم	نعم	نعم	ربما	ربما	لا	لا
أنثى	26-35 سنة	أعزب\عزباء	أكثر من 12000 جنيه مصري	ريف	شهادات عليا	شهادات عليا	شهادات عليا	عامل	نعم	لا	ليس لدي شريك	لا	نعم	أخرى	نعم	نعم	لا	ربما	نعم	لا	لا	لا	لا	لا	ربما	لا	ربما	لا	لا	لا	لا	ربما	نعم	نعم	نعم	نعم	ربما	لا	لا	لا
ذكر	18-25 سنة	أعزب\عزباء	6000-12000 جنيه مصري	ريف	جامعة بكالوريوس /دبلوم	جامعة بكالوريوس /دبلوم	جامعة بكالوريوس /دبلوم	طالب	لا	لا	ليس لدي شريك	لا	لا	أخرى	ربما	ربما	ربما	ربما	ربما	ربما	ربما	ربما	ربما	ربما	ربما	ربما	ربما	ربما	ربما	ربما	ربما	ربما	ربما	نعم	ربما	ربما	ربما	ربما	ربما	ربما
أنثى	26-35 سنة	متزوج/ة	أقل من 6000 جنيه مصري	ريف	جامعة بكالوريوس /دبلوم	جامعة بكالوريوس /دبلوم	جامعة بكالوريوس /دبلوم	مربية منزل	لا	لا	لا	لا	نعم	الإنترنت, التلفاز, الأصدقاء	نعم	لا	لا	نعم	نعم	لا	لا	لا	لا	لا	لا	لا	لا	لا	ربما	لا	لا	ربما	نعم	نعم	نعم	نعم	لا	لا	لا	لا
ذكر	26-35 سنة	أعزب\عزباء	6000-12000 جنيه مصري	مدينة	شهادات عليا	شهادات عليا	شهادات عليا	عامل	نعم	لا	لا	لا	نعم	الإنترنت, الأهل, الأصدقاء	نعم	نعم	لا	نعم	نعم	لا	لا	لا	لا	لا	لا	لا	نعم	لا	ربما	لا	لا	نعم	نعم	نعم	نعم	نعم	نعم	نعم	لا	ربما
أنثى	18-25 سنة	أعزب\عزباء	أقل من 6000 جنيه مصري	مدينة	جامعة بكالوريوس /دبلوم	جامعة بكالوريوس /دبلوم	جامعة بكالوريوس /دبلوم	عامل	نعم	لا	ليس لدي شريك	لا	نعم	الإنترنت	نعم	نعم	ربما	نعم	نعم	لا	لا	لا	لا	لا	لا	لا	نعم	لا	لا	لا	لا	نعم	نعم	نعم	نعم	نعم	ربما	ربما	لا	لا
أنثى	18-25 سنة	أعزب\عزباء	6000-12000 جنيه مصري	مدينة	جامعة بكالوريوس /دبلوم	شهادات عليا	جامعة بكالوريوس /دبلوم	عامل	نعم	لا	ليس لدي شريك	لا	نعم	الإنترنت, الطبيب	ربما	ربما	نعم	ربما	نعم	لا	لا	لا	لا	لا	ربما	لا	لا	لا	نعم	لا	لا	نعم	نعم	نعم	نعم	نعم	نعم	نعم	لا	لا
ذكر	18-25 سنة	أعزب\عزباء	6000-12000 جنيه مصري	ريف	جامعة بكالوريوس /دبلوم	جامعة بكالوريوس /دبلوم	جامعة بكالوريوس /دبلوم	طالب	لا	لا	ليس لدي شريك	لا	نعم	الإنترنت, التلفاز, المدرسة, الأهل, الأصدقاء, الصحف - الكتب - المجلات, الطبيب, أخرى	ربما	ربما	ربما	ربما	نعم	لا	لا	لا	لا	لا	لا	لا	ربما	لا	لا	لا	لا	نعم	نعم	نعم	نعم	نعم	ربما	ربما	لا	لا
ذكر	26-35 سنة	أعزب\عزباء	6000-12000 جنيه مصري	مدينة	جامعة بكالوريوس /دبلوم	جامعة بكالوريوس /دبلوم	جامعة بكالوريوس /دبلوم	عامل	نعم	لا	ليس لدي شريك	لا	نعم	المدرسة	نعم	لا	نعم	ربما	نعم	لا	لا	لا	لا	لا	لا	لا	نعم	لا	ربما	لا	لا	ربما	ربما	نعم	ربما	نعم	لا	لا	نعم	لا
ذكر	26-35 سنة	أعزب\عزباء	6000-12000 جنيه مصري	ريف	جامعة بكالوريوس /دبلوم	جامعة بكالوريوس /دبلوم	جامعة بكالوريوس /دبلوم	عامل	نعم	لا	ليس لدي شريك	لا	نعم	الصحف - الكتب - المجلات	نعم	لا	نعم	ربما	نعم	لا	لا	لا	لا	لا	ربما	لا	نعم	لا	ربما	لا	ربما	ربما	نعم	نعم	نعم	نعم	ربما	ربما	ربما	لا
أنثى	26-35 سنة	متزوج/ة	أقل من 6000 جنيه مصري	ريف	جامعة بكالوريوس /دبلوم	جامعة بكالوريوس /دبلوم	ابتدائي	مربية منزل	لا	نعم	لا	نعم	نعم	الأهل, الطبيب	نعم	نعم	لا	نعم	ربما	لا	لا	لا	لا	لا	لا	لا	نعم	لا	لا	لا	لا	ربما	نعم	نعم	نعم	نعم	نعم	نعم	لا	لا
أنثى	26-35 سنة	أعزب\عزباء	أقل من 6000 جنيه مصري	مدينة	شهادات عليا	شهادات عليا	جامعة بكالوريوس /دبلوم	عامل	نعم	لا	لا	لا	نعم	الإنترنت, التلفاز	ربما	ربما	لا	لا	نعم	لا	ربما	لا	ربما	لا	ربما	ربما	ربما	ربما	ربما	ربما	لا	ربما	نعم	نعم	نعم	ربما	ربما	نعم	لا	لا
ذكر	18-25 سنة	أعزب\عزباء	أكثر من 12000 جنيه مصري	ريف	جامعة بكالوريوس /دبلوم	جامعة بكالوريوس /دبلوم	ثانوي	طالب	نعم	لا	ليس لدي شريك	لا	نعم	الإنترنت, أخرى	ربما	ربما	ربما	ربما	نعم	لا	لا	لا	لا	لا	نعم	ربما	لا	ربما	ربما	لا	لا	نعم	نعم	نعم	نعم	نعم	ربما	ربما	لا	لا
أنثى	26-35 سنة	أعزب\عزباء	أقل من 6000 جنيه مصري	ريف	جامعة بكالوريوس /دبلوم	جامعة بكالوريوس /دبلوم	جامعة بكالوريوس /دبلوم	عامل	نعم	لا	لا	لا	نعم	الطبيب	نعم	نعم	لا	ربما	نعم	لا	لا	لا	لا	لا	لا	لا	ربما	لا	لا	لا	لا	نعم	نعم	نعم	نعم	نعم	ربما	نعم	لا	لا
أنثى	18-25 سنة	أعزب\عزباء	أكثر من 12000 جنيه مصري	مدينة	ثانوي	شهادات عليا	شهادات عليا	طالب	نعم	لا	ليس لدي شريك	لا	نعم	الأهل	نعم	نعم	لا	نعم	نعم	لا	لا	لا	لا	لا	لا	لا	نعم	لا	نعم	لا	لا	لا	نعم	نعم	نعم	نعم	نعم	نعم	لا	لا
أنثى	18-25 سنة	أعزب\عزباء	6000-12000 جنيه مصري	ريف	جامعة بكالوريوس /دبلوم	جامعة بكالوريوس /دبلوم	جامعة بكالوريوس /دبلوم	طالب	نعم	لا	ليس لدي شريك	لا	نعم	الإنترنت, التلفاز, المدرسة, الأصدقاء, الصحف - الكتب - المجلات	نعم	نعم	ربما	ربما	نعم	لا	لا	لا	لا	لا	ربما	لا	نعم	لا	ربما	لا	لا	ربما	نعم	نعم	نعم	نعم	نعم	نعم	لا	لا
أنثى	18-25 سنة	أعزب\عزباء	6000-12000 جنيه مصري	ريف	جامعة بكالوريوس /دبلوم	ثانوي	ابتدائي	طالب	نعم	لا	لا	لا	نعم	المدرسة	نعم	لا	نعم	ربما	نعم	لا	لا	لا	لا	لا	لا	لا	نعم	لا	ربما	ربما	لا	ربما	نعم	نعم	نعم	نعم	ربما	ربما	لا	لا
ذكر	18-25 سنة	أعزب\عزباء	أكثر من 12000 جنيه مصري	مدينة	جامعة بكالوريوس /دبلوم	شهادات عليا	شهادات عليا	طالب	لا	لا	لا	لا	نعم	الصحف - الكتب - المجلات	نعم	ربما	ربما	لا	نعم	لا	لا	لا	لا	لا	ربما	لا	نعم	لا	لا	لا	لا	ربما	نعم	نعم	نعم	نعم	نعم	نعم	لا	لا
ذكر	18-25 سنة	أعزب\عزباء	أقل من 6000 جنيه مصري	ريف	جامعة بكالوريوس /دبلوم	جامعة بكالوريوس /دبلوم	جامعة بكالوريوس /دبلوم	طالب	نعم	لا	ليس لدي شريك	لا	نعم	الإنترنت, المدرسة, الصحف - الكتب - المجلات, الطبيب	نعم	نعم	نعم	لا	نعم	لا	لا	لا	لا	لا	نعم	لا	لا	لا	لا	لا	لا	نعم	نعم	نعم	نعم	نعم	لا	لا	لا	لا
ذكر	18-25 سنة	أعزب\عزباء	أقل من 6000 جنيه مصري	مدينة	شهادات عليا	شهادات عليا	شهادات عليا	طالب	نعم	لا	لا	لا	لا	أخرى	نعم	نعم	نعم	نعم	نعم	لا	لا	لا	لا	لا	لا	لا	نعم	لا	لا	لا	لا	لا	نعم	نعم	نعم	نعم	نعم	نعم	لا	لا
أنثى	26-35 سنة	أعزب\عزباء	أكثر من 12000 جنيه مصري	مدينة	جامعة بكالوريوس /دبلوم	شهادات عليا	شهادات عليا	عامل	نعم	لا	لا	لا	نعم	الإنترنت, الأصدقاء	نعم	نعم	لا	ربما	نعم	لا	لا	لا	لا	لا	ربما	لا	نعم	لا	لا	لا	لا	ربما	نعم	نعم	نعم	نعم	نعم	نعم	لا	لا
أنثى	18-25 سنة	أعزب\عزباء	أقل من 6000 جنيه مصري	ريف	جامعة بكالوريوس /دبلوم	ابتدائي	ابتدائي	طالب	نعم	لا	لا	لا	نعم	الأصدقاء	نعم	نعم	نعم	نعم	نعم	لا	لا	لا	لا	لا	نعم	نعم	لا	لا	لا	لا	لا	لا	نعم	نعم	نعم	نعم	نعم	نعم	لا	لا
ذكر	26-35 سنة	أعزب\عزباء	أقل من 6000 جنيه مصري	ريف	جامعة بكالوريوس /دبلوم	ابتدائي	ابتدائي	عامل	نعم	لا	ليس لدي شريك	لا	نعم	الأهل	نعم	نعم	ربما	نعم	نعم	لا	لا	لا	لا	لا	ربما	لا	لا	لا	ربما	لا	لا	لا	نعم	نعم	نعم	نعم	لا	لا	لا	لا
أنثى	18-25 سنة	أعزب\عزباء	6000-12000 جنيه مصري	مدينة	جامعة بكالوريوس /دبلوم	جامعة بكالوريوس /دبلوم	جامعة بكالوريوس /دبلوم	طالب	نعم	لا	لا	لا	نعم	الطبيب	نعم	نعم	لا	نعم	نعم	لا	لا	لا	لا	لا	لا	لا	نعم	لا	لا	نعم	لا	لا	نعم	نعم	نعم	نعم	نعم	نعم	لا	لا
ذكر	26-35 سنة	أعزب\عزباء	أقل من 6000 جنيه مصري	ريف	شهادات عليا	ابتدائي	ابتدائي	عامل	لا	لا	لا	لا	نعم	أخرى	ربما	ربما	نعم	ربما	ربما	ربما	ربما	ربما	ربما	ربما	ربما	نعم	ربما	ربما	ربما	ربما	ربما	ربما	ربما	ربما	ربما	ربما	لا	ربما	ربما	لا
ذكر	18-25 سنة	أعزب\عزباء	6000-12000 جنيه مصري	ريف	جامعة بكالوريوس /دبلوم	شهادات عليا	شهادات عليا	عامل	لا	لا	ليس لدي شريك	لا	نعم	الأهل	نعم	ربما	لا	ربما	ربما	لا	لا	ربما	لا	لا	ربما	ربما	لا	لا	ربما	لا	لا	لا	نعم	نعم	نعم	نعم	نعم	نعم	لا	لا
أنثى	26-35 سنة	أعزب\عزباء	6000-12000 جنيه مصري	ريف	جامعة بكالوريوس /دبلوم	جامعة بكالوريوس /دبلوم	ثانوي	عامل	نعم	لا	ليس لدي شريك	لا	نعم	الإنترنت, التلفاز, الصحف - الكتب - المجلات	نعم	نعم	نعم	لا	نعم	لا	لا	لا	لا	لا	لا	لا	لا	لا	لا	لا	لا	لا	نعم	نعم	نعم	نعم	ربما	ربما	لا	لا
ذكر	18-25 سنة	أعزب\عزباء	أقل من 6000 جنيه مصري	مدينة	جامعة بكالوريوس /دبلوم	جامعة بكالوريوس /دبلوم	جامعة بكالوريوس /دبلوم	عامل	نعم	لا	ليس لدي شريك	لا	نعم	المدرسة	نعم	لا	لا	لا	لا	لا	لا	لا	لا	لا	لا	لا	لا	لا	لا	لا	لا	لا	نعم	نعم	نعم	نعم	نعم	نعم	لا	لا
أنثى	18-25 سنة	أعزب\عزباء	6000-12000 جنيه مصري	مدينة	جامعة بكالوريوس /دبلوم	جامعة بكالوريوس /دبلوم	جامعة بكالوريوس /دبلوم	طالب	لا	لا	ليس لدي شريك	لا	نعم	التلفاز, الأهل	نعم	نعم	ربما	ربما	نعم	لا	لا	لا	لا	لا	لا	لا	لا	لا	ربما	لا	لا	ربما	نعم	نعم	نعم	نعم	نعم	نعم	لا	لا
أنثى	18-25 سنة	أعزب\عزباء	6000-12000 جنيه مصري	مدينة	جامعة بكالوريوس /دبلوم	شهادات عليا	شهادات عليا	عامل	نعم	نعم	ليس لدي شريك	لا	نعم	الإنترنت, الأهل, الأصدقاء, الطبيب	نعم	نعم	لا	ربما	نعم	لا	لا	لا	لا	لا	ربما	لا	لا	لا	لا	لا	لا	ربما	نعم	نعم	نعم	نعم	نعم	نعم	لا	لا
أنثى	18-25 سنة	أعزب\عزباء	أقل من 6000 جنيه مصري	مدينة	جامعة بكالوريوس /دبلوم	جامعة بكالوريوس /دبلوم	ثانوي	طالب	نعم	لا	لا	لا	نعم	الإنترنت, التلفاز, المدرسة, الأهل, الأصدقاء, الصحف - الكتب - المجلات	نعم	نعم	نعم	نعم	نعم	لا	لا	لا	لا	لا	لا	لا	لا	لا	نعم	لا	ربما	لا	نعم	نعم	نعم	نعم	نعم	نعم	لا	لا
ذكر	36-50 سنة	متزوج/ة	6000-12000 جنيه مصري	ريف	شهادات عليا	جامعة بكالوريوس /دبلوم	ابتدائي	عامل	لا	لا	لا	لا	نعم	الإنترنت, التلفاز, المدرسة, الأهل, الأصدقاء, الصحف - الكتب - المجلات, الطبيب, أخرى	نعم	ربما	لا	نعم	نعم	لا	لا	لا	لا	لا	لا	لا	لا	لا	لا	لا	لا	ربما	نعم	نعم	نعم	نعم	نعم	نعم	لا	لا
أنثى	26-35 سنة	أعزب\عزباء	أقل من 6000 جنيه مصري	ريف	جامعة بكالوريوس /دبلوم	ابتدائي	ابتدائي	عامل	لا	لا	ليس لدي شريك	لا	نعم	الأهل	ربما	ربما	لا	ربما	نعم	لا	لا	لا	لا	لا	ربما	لا	لا	لا	ربما	لا	لا	ربما	نعم	نعم	نعم	نعم	ربما	ربما	لا	لا
أنثى	18-25 سنة	أعزب\عزباء	6000-12000 جنيه مصري	مدينة	جامعة بكالوريوس /دبلوم	ثانوي	ثانوي	طالب	نعم	لا	ليس لدي شريك	لا	نعم	الإنترنت, التلفاز, المدرسة, الصحف - الكتب - المجلات	نعم	ربما	لا	لا	ربما	لا	لا	لا	لا	لا	لا	لا	نعم	لا	ربما	لا	لا	لا	نعم	نعم	نعم	نعم	نعم	نعم	لا	لا
أنثى	26-35 سنة	أعزب\عزباء	أكثر من 12000 جنيه مصري	مدينة	جامعة بكالوريوس /دبلوم	جامعة بكالوريوس /دبلوم	جامعة بكالوريوس /دبلوم	عامل	نعم	لا	ليس لدي شريك	لا	نعم	الإنترنت, التلفاز, الصحف - الكتب - المجلات, الطبيب	نعم	نعم	نعم	نعم	نعم	لا	لا	لا	لا	لا	نعم	لا	نعم	لا	نعم	لا	لا	لا	نعم	ربما	نعم	ربما	لا	لا	ربما	لا
ذكر	18-25 سنة	أعزب\عزباء	6000-12000 جنيه مصري	مدينة	جامعة بكالوريوس /دبلوم	شهادات عليا	شهادات عليا	طالب	لا	لا	لا	لا	نعم	الإنترنت, المدرسة, الصحف - الكتب - المجلات	ربما	نعم	ربما	لا	ربما	لا	لا	لا	لا	لا	ربما	لا	ربما	لا	لا	لا	لا	ربما	نعم	نعم	نعم	نعم	ربما	نعم	لا	لا
ذكر	18-25 سنة	أعزب\عزباء	6000-12000 جنيه مصري	مدينة	جامعة بكالوريوس /دبلوم	جامعة بكالوريوس /دبلوم	شهادات عليا	طالب	نعم	نعم	ليس لدي شريك	نعم	نعم	التلفاز	نعم	نعم	ربما	نعم	نعم	لا	لا	لا	لا	لا	لا	لا	نعم	لا	لا	لا	لا	ربما	نعم	نعم	نعم	نعم	ربما	ربما	لا	ربما
ذكر	26-35 سنة	أعزب\عزباء	6000-12000 جنيه مصري	مدينة	جامعة بكالوريوس /دبلوم	شهادات عليا	جامعة بكالوريوس /دبلوم	عامل	نعم	لا	لا	لا	نعم	الإنترنت, التلفاز, أخرى	نعم	نعم	لا	نعم	نعم	لا	لا	لا	لا	لا	لا	لا	لا	لا	لا	لا	لا	لا	نعم	نعم	نعم	نعم	نعم	نعم	لا	لا
أنثى	18-25 سنة	متزوج/ة	أكثر من 12000 جنيه مصري	مدينة	جامعة بكالوريوس /دبلوم	شهادات عليا	شهادات عليا	عامل	نعم	لا	لا	لا	نعم	الإنترنت, الأهل, الصحف - الكتب - المجلات, الطبيب	نعم	نعم	ربما	نعم	نعم	لا	لا	لا	لا	لا	نعم	لا	نعم	لا	ربما	لا	لا	ربما	نعم	نعم	نعم	نعم	نعم	نعم	لا	لا
ذكر	26-35 سنة	أعزب\عزباء	6000-12000 جنيه مصري	ريف	جامعة بكالوريوس /دبلوم	ثانوي	جامعة بكالوريوس /دبلوم	عامل	نعم	لا	ليس لدي شريك	لا	نعم	الطبيب	نعم	نعم	نعم	نعم	نعم	لا	لا	لا	لا	لا	نعم	لا	ربما	لا	ربما	لا	لا	ربما	ربما	نعم	نعم	نعم	ربما	ربما	ربما	لا
أنثى	26-35 سنة	أعزب\عزباء	6000-12000 جنيه مصري	ريف	جامعة بكالوريوس /دبلوم	جامعة بكالوريوس /دبلوم	جامعة بكالوريوس /دبلوم	عامل	نعم	لا	ليس لدي شريك	لا	نعم	الصحف - الكتب - المجلات, الطبيب	نعم	نعم	ربما	نعم	نعم	لا	لا	لا	لا	لا	لا	لا	ربما	لا	لا	لا	لا	لا	نعم	نعم	نعم	نعم	ربما	ربما	لا	لا
ذكر	18-25 سنة	أعزب\عزباء	أكثر من 12000 جنيه مصري	مدينة	جامعة بكالوريوس /دبلوم	جامعة بكالوريوس /دبلوم	جامعة بكالوريوس /دبلوم	طالب	نعم	لا	ليس لدي شريك	لا	نعم	التلفاز, المدرسة, الأهل, أخرى	نعم	نعم	نعم	نعم	لا	لا	لا	لا	لا	لا	لا	لا	ربما	لا	لا	ربما	لا	ربما	ربما	نعم	نعم	نعم	لا	لا	لا	لا
ذكر	18-25 سنة	أعزب\عزباء	أقل من 6000 جنيه مصري	ريف	جامعة بكالوريوس /دبلوم	ابتدائي	ابتدائي	طالب	نعم	لا	ليس لدي شريك	لا	لا	أخرى	ربما	ربما	ربما	ربما	ربما	ربما	ربما	ربما	ربما	ربما	ربما	ربما	ربما	ربما	ربما	ربما	ربما	ربما	ربما	ربما	نعم	ربما	ربما	ربما	ربما	ربما
أنثى	18-25 سنة	متزوج/ة	6000-12000 جنيه مصري	مدينة	جامعة بكالوريوس /دبلوم	جامعة بكالوريوس /دبلوم	جامعة بكالوريوس /دبلوم	طالب	نعم	لا	لا	لا	نعم	الصحف - الكتب - المجلات	نعم	نعم	ربما	نعم	نعم	لا	لا	لا	لا	لا	نعم	لا	ربما	لا	لا	لا	لا	ربما	نعم	نعم	نعم	نعم	نعم	نعم	لا	لا
أنثى	26-35 سنة	أعزب\عزباء	6000-12000 جنيه مصري	مدينة	جامعة بكالوريوس /دبلوم	شهادات عليا	شهادات عليا	عامل	نعم	لا	لا	لا	نعم	الإنترنت	نعم	نعم	ربما	ربما	نعم	لا	لا	لا	لا	لا	لا	ربما	لا	لا	لا	لا	لا	ربما	نعم	نعم	نعم	نعم	ربما	نعم	لا	لا
أنثى	18-25 سنة	أعزب\عزباء	أكثر من 12000 جنيه مصري	مدينة	جامعة بكالوريوس /دبلوم	شهادات عليا	شهادات عليا	طالب	نعم	لا	ليس لدي شريك	لا	نعم	الإنترنت, المدرسة, الصحف - الكتب - المجلات	نعم	نعم	ربما	ربما	نعم	لا	لا	لا	لا	لا	ربما	لا	ربما	لا	لا	لا	لا	لا	نعم	نعم	نعم	نعم	نعم	نعم	لا	لا
ذكر	26-35 سنة	أعزب\عزباء	6000-12000 جنيه مصري	مدينة	جامعة بكالوريوس /دبلوم	جامعة بكالوريوس /دبلوم	جامعة بكالوريوس /دبلوم	طالب	نعم	لا	ليس لدي شريك	لا	نعم	الإنترنت, المدرسة, الأصدقاء, الطبيب	نعم	نعم	نعم	ربما	نعم	لا	لا	ربما	لا	ربما	ربما	لا	ربما	ربما	ربما	لا	لا	نعم	نعم	نعم	نعم	نعم	لا	لا	ربما	ربما
أنثى	26-35 سنة	أعزب\عزباء	6000-12000 جنيه مصري	مدينة	جامعة بكالوريوس /دبلوم	جامعة بكالوريوس /دبلوم	جامعة بكالوريوس /دبلوم	عامل	نعم	نعم	لا	لا	نعم	الإنترنت, الأهل, الأصدقاء, الصحف - الكتب - المجلات, الطبيب	ربما	نعم	ربما	نعم	نعم	لا	لا	لا	لا	لا	لا	لا	ربما	لا	لا	لا	لا	ربما	نعم	نعم	نعم	نعم	نعم	نعم	لا	لا
أنثى	18-25 سنة	أعزب\عزباء	أكثر من 12000 جنيه مصري	مدينة	جامعة بكالوريوس /دبلوم	شهادات عليا	شهادات عليا	عامل	نعم	لا	ليس لدي شريك	لا	نعم	الإنترنت, التلفاز, الأهل, الصحف - الكتب - المجلات, أخرى	ربما	نعم	نعم	لا	نعم	لا	لا	لا	لا	لا	ربما	لا	ربما	لا	لا	ربما	لا	ربما	نعم	نعم	نعم	نعم	ربما	ربما	لا	لا
أنثى	18-25 سنة	أعزب\عزباء	6000-12000 جنيه مصري	ريف	جامعة بكالوريوس /دبلوم	جامعة بكالوريوس /دبلوم	جامعة بكالوريوس /دبلوم	طالب	نعم	لا	لا	لا	نعم	الإنترنت, التلفاز, الطبيب	نعم	نعم	نعم	نعم	نعم	لا	لا	لا	لا	لا	لا	لا	ربما	لا	ربما	لا	ربما	ربما	نعم	نعم	نعم	نعم	لا	ربما	ربما	لا
أنثى	18-25 سنة	أعزب\عزباء	6000-12000 جنيه مصري	مدينة	جامعة بكالوريوس /دبلوم	جامعة بكالوريوس /دبلوم	جامعة بكالوريوس /دبلوم	طالب	نعم	لا	لا	لا	نعم	الإنترنت, التلفاز, الأصدقاء	نعم	ربما	لا	ربما	نعم	لا	لا	لا	لا	لا	لا	لا	لا	لا	لا	لا	لا	ربما	نعم	نعم	نعم	نعم	ربما	ربما	لا	لا
أنثى	18-25 سنة	أعزب\عزباء	6000-12000 جنيه مصري	مدينة	شهادات عليا	جامعة بكالوريوس /دبلوم	جامعة بكالوريوس /دبلوم	طالب	نعم	لا	ليس لدي شريك	لا	نعم	الإنترنت, التلفاز, الصحف - الكتب - المجلات, الطبيب	نعم	نعم	لا	نعم	نعم	لا	لا	لا	لا	لا	لا	لا	ربما	لا	لا	لا	لا	نعم	نعم	نعم	نعم	نعم	ربما	ربما	لا	لا
أنثى	18-25 سنة	أعزب\عزباء	أقل من 6000 جنيه مصري	مدينة	جامعة بكالوريوس /دبلوم	جامعة بكالوريوس /دبلوم	جامعة بكالوريوس /دبلوم	طالب	لا	لا	ليس لدي شريك	لا	نعم	التلفاز	نعم	نعم	نعم	ربما	نعم	لا	لا	لا	لا	لا	ربما	ربما	نعم	لا	ربما	لا	لا	نعم	ربما	لا	لا	لا	ربما	نعم	لا	لا
أنثى	18-25 سنة	متزوج/ة	6000-12000 جنيه مصري	مدينة	جامعة بكالوريوس /دبلوم	جامعة بكالوريوس /دبلوم	ثانوي	طالب	نعم	لا	لا	لا	نعم	الإنترنت, التلفاز, المدرسة, الأهل, الأصدقاء, الصحف - الكتب - المجلات, الطبيب	نعم	نعم	نعم	نعم	نعم	لا	لا	لا	لا	لا	لا	لا	ربما	لا	لا	لا	لا	نعم	نعم	نعم	نعم	نعم	نعم	نعم	لا	لا
أنثى	18-25 سنة	أعزب\عزباء	6000-12000 جنيه مصري	مدينة	جامعة بكالوريوس /دبلوم	جامعة بكالوريوس /دبلوم	جامعة بكالوريوس /دبلوم	طالب	نعم	نعم	ليس لدي شريك	نعم	نعم	أخرى	نعم	نعم	ربما	نعم	نعم	لا	لا	لا	لا	لا	لا	لا	نعم	لا	لا	لا	لا	نعم	نعم	نعم	نعم	نعم	نعم	نعم	لا	لا
أنثى	18-25 سنة	أعزب\عزباء	أكثر من 12000 جنيه مصري	مدينة	جامعة بكالوريوس /دبلوم	شهادات عليا	جامعة بكالوريوس /دبلوم	عاطل عن العمل	نعم	لا	ليس لدي شريك	لا	نعم	الإنترنت, التلفاز, الصحف - الكتب - المجلات	نعم	نعم	لا	نعم	نعم	لا	لا	لا	لا	لا	لا	لا	نعم	لا	لا	لا	لا	نعم	نعم	نعم	نعم	نعم	نعم	نعم	لا	لا
أنثى	18-25 سنة	أعزب\عزباء	أقل من 6000 جنيه مصري	مدينة	ثانوي	جامعة بكالوريوس /دبلوم	جامعة بكالوريوس /دبلوم	طالب	نعم	لا	لا	لا	نعم	الإنترنت, الصحف - الكتب - المجلات	نعم	لا	لا	لا	نعم	لا	لا	لا	لا	لا	لا	لا	نعم	لا	لا	لا	لا	لا	نعم	نعم	نعم	نعم	ربما	ربما	ربما	لا
ذكر	18-25 سنة	أعزب\عزباء	أكثر من 12000 جنيه مصري	مدينة	جامعة بكالوريوس /دبلوم	جامعة بكالوريوس /دبلوم	جامعة بكالوريوس /دبلوم	طالب	نعم	لا	ليس لدي شريك	لا	نعم	المدرسة, أخرى	نعم	نعم	ربما	لا	نعم	لا	لا	لا	لا	لا	نعم	لا	لا	لا	ربما	لا	لا	ربما	نعم	نعم	نعم	نعم	ربما	نعم	لا	لا
ذكر	18-25 سنة	أعزب\عزباء	6000-12000 جنيه مصري	مدينة	جامعة بكالوريوس /دبلوم	جامعة بكالوريوس /دبلوم	جامعة بكالوريوس /دبلوم	طالب	نعم	لا	ليس لدي شريك	لا	نعم	أخرى	نعم	نعم	ربما	ربما	ربما	لا	لا	لا	لا	لا	ربما	لا	لا	لا	لا	لا	لا	لا	نعم	نعم	نعم	نعم	نعم	نعم	لا	لا
ذكر	18-25 سنة	أعزب\عزباء	أكثر من 12000 جنيه مصري	مدينة	جامعة بكالوريوس /دبلوم	جامعة بكالوريوس /دبلوم	جامعة بكالوريوس /دبلوم	عامل	نعم	لا	ليس لدي شريك	لا	نعم	أخرى	نعم	نعم	لا	ربما	نعم	لا	لا	لا	لا	لا	نعم	ربما	ربما	لا	لا	لا	لا	ربما	نعم	نعم	نعم	نعم	ربما	ربما	ربما	ربما
ذكر	18-25 سنة	متزوج/ة	6000-12000 جنيه مصري	مدينة	جامعة بكالوريوس /دبلوم	جامعة بكالوريوس /دبلوم	جامعة بكالوريوس /دبلوم	عاطل عن العمل	لا	لا	لا	لا	نعم	الإنترنت, المدرسة, الأهل	نعم	لا	نعم	لا	نعم	لا	لا	لا	لا	لا	ربما	لا	نعم	لا	نعم	لا	لا	لا	نعم	نعم	نعم	نعم	نعم	نعم	لا	لا
أنثى	26-35 سنة	متزوج/ة	6000-12000 جنيه مصري	مدينة	جامعة بكالوريوس /دبلوم	جامعة بكالوريوس /دبلوم	جامعة بكالوريوس /دبلوم	عامل	نعم	نعم	لا	لا	نعم	الأهل, الأصدقاء, أخرى	نعم	نعم	ربما	نعم	نعم	لا	لا	لا	لا	لا	لا	لا	نعم	لا	لا	ربما	لا	نعم	ربما	نعم	نعم	نعم	ربما	ربما	لا	لا
ذكر	26-35 سنة	أعزب\عزباء	6000-12000 جنيه مصري	ريف	جامعة بكالوريوس /دبلوم	جامعة بكالوريوس /دبلوم	جامعة بكالوريوس /دبلوم	عامل	نعم	لا	ليس لدي شريك	لا	نعم	الأهل, الأصدقاء, الصحف - الكتب - المجلات	نعم	نعم	لا	لا	نعم	لا	لا	لا	لا	لا	لا	لا	نعم	لا	ربما	لا	لا	لا	نعم	نعم	نعم	نعم	نعم	نعم	لا	لا
ذكر	18-25 سنة	أعزب\عزباء	أكثر من 12000 جنيه مصري	مدينة	جامعة بكالوريوس /دبلوم	جامعة بكالوريوس /دبلوم	جامعة بكالوريوس /دبلوم	طالب	نعم	لا	لا	نعم	نعم	أخرى	لا	نعم	ربما	نعم	نعم	لا	لا	لا	لا	لا	ربما	ربما	ربما	لا	لا	نعم	لا	ربما	نعم	نعم	نعم	نعم	نعم	نعم	لا	لا
ذكر	18-25 سنة	أعزب\عزباء	أكثر من 12000 جنيه مصري	مدينة	جامعة بكالوريوس /دبلوم	شهادات عليا	شهادات عليا	عاطل عن العمل	لا	لا	ليس لدي شريك	لا	نعم	الإنترنت, الأهل, الأصدقاء, الطبيب	نعم	لا	نعم	لا	نعم	لا	لا	لا	لا	لا	نعم	لا	نعم	لا	لا	لا	لا	ربما	نعم	نعم	نعم	نعم	ربما	ربما	لا	لا
ذكر	18-25 سنة	أعزب\عزباء	أكثر من 12000 جنيه مصري	مدينة	جامعة بكالوريوس /دبلوم	جامعة بكالوريوس /دبلوم	جامعة بكالوريوس /دبلوم	طالب	نعم	لا	ليس لدي شريك	لا	نعم	الإنترنت, المدرسة, الصحف - الكتب - المجلات, الطبيب, أخرى	نعم	نعم	ربما	لا	ربما	لا	لا	لا	لا	لا	لا	لا	ربما	لا	لا	لا	لا	نعم	نعم	نعم	نعم	نعم	نعم	نعم	لا	لا
ذكر	18-25 سنة	أعزب\عزباء	6000-12000 جنيه مصري	ريف	جامعة بكالوريوس /دبلوم	جامعة بكالوريوس /دبلوم	جامعة بكالوريوس /دبلوم	عاطل عن العمل	نعم	لا	ليس لدي شريك	لا	لا	أخرى	نعم	نعم	نعم	نعم	نعم	ربما	ربما	لا	ربما	لا	ربما	ربما	ربما	ربما	ربما	نعم	ربما	نعم	نعم	نعم	نعم	ربما	نعم	نعم	ربما	لا
ذكر	18-25 سنة	أعزب\عزباء	6000-12000 جنيه مصري	مدينة	ثانوي	جامعة بكالوريوس /دبلوم	جامعة بكالوريوس /دبلوم	طالب	لا	لا	ليس لدي شريك	لا	نعم	الإنترنت, التلفاز	ربما	لا	نعم	لا	لا	لا	لا	لا	لا	لا	لا	لا	نعم	لا	لا	لا	لا	ربما	نعم	نعم	نعم	نعم	ربما	ربما	لا	لا
أنثى	18-25 سنة	أعزب\عزباء	أقل من 6000 جنيه مصري	مدينة	جامعة بكالوريوس /دبلوم	ثانوي	جامعة بكالوريوس /دبلوم	طالب	لا	لا	ليس لدي شريك	لا	نعم	الإنترنت	نعم	نعم	لا	نعم	نعم	لا	لا	لا	لا	لا	ربما	ربما	ربما	لا	ربما	لا	لا	نعم	نعم	نعم	نعم	نعم	نعم	نعم	لا	لا
ذكر	18-25 سنة	أعزب\عزباء	أكثر من 12000 جنيه مصري	مدينة	جامعة بكالوريوس /دبلوم	شهادات عليا	شهادات عليا	طالب	لا	لا	لا	لا	نعم	الإنترنت	نعم	نعم	نعم	لا	نعم	نعم	لا	نعم	لا	نعم	لا	نعم	لا	لا	نعم	لا	لا	نعم	نعم	لا	نعم	لا	لا	لا	لا	لا
ذكر	18-25 سنة	أعزب\عزباء	أقل من 6000 جنيه مصري	ريف	جامعة بكالوريوس /دبلوم	جامعة بكالوريوس /دبلوم	جامعة بكالوريوس /دبلوم	طالب	نعم	نعم	ليس لدي شريك	نعم	نعم	الأهل	نعم	نعم	لا	نعم	نعم	لا	لا	لا	لا	ربما	لا	لا	نعم	لا	لا	لا	لا	ربما	نعم	نعم	نعم	نعم	نعم	نعم	لا	لا
أنثى	18-25 سنة	أعزب\عزباء	6000-12000 جنيه مصري	ريف	جامعة بكالوريوس /دبلوم	ثانوي	ابتدائي	عامل	لا	لا	ليس لدي شريك	لا	نعم	الإنترنت	نعم	ربما	لا	لا	ربما	لا	لا	لا	لا	لا	لا	لا	ربما	لا	لا	لا	لا	نعم	نعم	نعم	نعم	نعم	نعم	نعم	لا	لا
ذكر	18-25 سنة	أعزب\عزباء	6000-12000 جنيه مصري	مدينة	جامعة بكالوريوس /دبلوم	جامعة بكالوريوس /دبلوم	ابتدائي	طالب	لا	لا	ليس لدي شريك	لا	نعم	الإنترنت, التلفاز, المدرسة	نعم	نعم	ربما	لا	نعم	لا	ربما	لا	ربما	لا	ربما	لا	ربما	لا	ربما	لا	لا	ربما	ربما	ربما	ربما	ربما	لا	لا	ربما	ربما
أنثى	18-25 سنة	أعزب\عزباء	6000-12000 جنيه مصري	مدينة	شهادات عليا	شهادات عليا	جامعة بكالوريوس /دبلوم	طالب	لا	لا	ليس لدي شريك	لا	نعم	الإنترنت, التلفاز	ربما	نعم	نعم	ربما	نعم	لا	لا	لا	لا	لا	نعم	ربما	ربما	ربما	لا	لا	ربما	لا	نعم	نعم	نعم	نعم	نعم	ربما	ربما	لا
ذكر	18-25 سنة	أعزب\عزباء	6000-12000 جنيه مصري	مدينة	جامعة بكالوريوس /دبلوم	ثانوي	جامعة بكالوريوس /دبلوم	طالب	لا	لا	ليس لدي شريك	لا	نعم	الأهل, أخرى	نعم	نعم	ربما	ربما	نعم	لا	ربما	ربما	ربما	ربما	ربما	ربما	نعم	ربما	لا	لا	ربما	ربما	نعم	نعم	نعم	نعم	نعم	ربما	لا	لا
ذكر	18-25 سنة	أعزب\عزباء	6000-12000 جنيه مصري	مدينة	جامعة بكالوريوس /دبلوم	جامعة بكالوريوس /دبلوم	جامعة بكالوريوس /دبلوم	طالب	لا	لا	ليس لدي شريك	لا	نعم	الإنترنت	نعم	لا	لا	لا	نعم	لا	لا	لا	لا	لا	لا	لا	نعم	لا	لا	لا	لا	لا	نعم	نعم	نعم	نعم	لا	لا	نعم	لا
ذكر	18-25 سنة	أعزب\عزباء	أقل من 6000 جنيه مصري	مدينة	جامعة بكالوريوس /دبلوم	جامعة بكالوريوس /دبلوم	جامعة بكالوريوس /دبلوم	طالب	لا	لا	ليس لدي شريك	لا	نعم	الإنترنت	نعم	ربما	ربما	ربما	نعم	لا	لا	لا	لا	لا	نعم	لا	ربما	لا	ربما	لا	لا	ربما	ربما	ربما	ربما	ربما	لا	لا	لا	لا
ذكر	18-25 سنة	أعزب\عزباء	6000-12000 جنيه مصري	ريف	جامعة بكالوريوس /دبلوم	جامعة بكالوريوس /دبلوم	جامعة بكالوريوس /دبلوم	طالب	لا	لا	نعم	لا	نعم	الأهل	نعم	لا	لا	لا	لا	ربما	لا	لا	لا	لا	لا	لا	لا	لا	نعم	لا	لا	لا	نعم	نعم	نعم	لا	لا	نعم	لا	لا
أنثى	26-35 سنة	أعزب\عزباء	أكثر من 12000 جنيه مصري	مدينة	شهادات عليا	ثانوي	جامعة بكالوريوس /دبلوم	عامل	لا	لا	ليس لدي شريك	لا	نعم	الإنترنت	ربما	ربما	ربما	ربما	نعم	لا	ربما	لا	ربما	ربما	ربما	ربما	ربما	ربما	ربما	لا	لا	ربما	نعم	نعم	نعم	ربما	ربما	ربما	ربما	لا
ذكر	18-25 سنة	أعزب\عزباء	6000-12000 جنيه مصري	مدينة	جامعة بكالوريوس /دبلوم	ابتدائي	ثانوي	طالب	لا	لا	ليس لدي شريك	لا	نعم	الإنترنت, التلفاز, الصحف - الكتب - المجلات	ربما	لا	ربما	ربما	نعم	لا	لا	لا	لا	لا	ربما	لا	ربما	لا	لا	لا	لا	ربما	نعم	نعم	نعم	نعم	نعم	نعم	لا	لا
أنثى	18-25 سنة	أعزب\عزباء	أكثر من 12000 جنيه مصري	مدينة	جامعة بكالوريوس /دبلوم	جامعة بكالوريوس /دبلوم	جامعة بكالوريوس /دبلوم	طالب	نعم	لا	ليس لدي شريك	لا	نعم	الإنترنت	نعم	نعم	لا	نعم	نعم	لا	لا	لا	لا	لا	لا	لا	نعم	لا	نعم	لا	لا	ربما	نعم	نعم	نعم	نعم	نعم	نعم	لا	لا
ذكر	18-25 سنة	أعزب\عزباء	أكثر من 12000 جنيه مصري	مدينة	شهادات عليا	جامعة بكالوريوس /دبلوم	جامعة بكالوريوس /دبلوم	طالب	لا	لا	لا	لا	نعم	المدرسة, الطبيب	نعم	نعم	لا	نعم	نعم	ربما	ربما	ربما	ربما	لا	نعم	لا	لا	لا	نعم	لا	لا	لا	نعم	نعم	نعم	نعم	نعم	نعم	لا	لا
ذكر	18-25 سنة	أعزب\عزباء	6000-12000 جنيه مصري	مدينة	جامعة بكالوريوس /دبلوم	جامعة بكالوريوس /دبلوم	جامعة بكالوريوس /دبلوم	طالب	نعم	لا	لا	لا	نعم	الأهل	نعم	ربما	نعم	ربما	نعم	ربما	لا	ربما	لا	ربما	ربما	نعم	ربما	نعم	لا	ربما	لا	ربما	نعم	ربما	نعم	نعم	ربما	ربما	ربما	لا
أنثى	18-25 سنة	أعزب\عزباء	6000-12000 جنيه مصري	ريف	جامعة بكالوريوس /دبلوم	جامعة بكالوريوس /دبلوم	جامعة بكالوريوس /دبلوم	طالب	لا	لا	ليس لدي شريك	لا	نعم	الإنترنت, التلفاز, المدرسة, الأهل, الأصدقاء, الصحف - الكتب - المجلات, أخرى	نعم	نعم	ربما	نعم	نعم	لا	لا	لا	لا	لا	نعم	لا	نعم	لا	ربما	ربما	لا	نعم	نعم	نعم	نعم	نعم	ربما	ربما	لا	لا
أنثى	18-25 سنة	أعزب\عزباء	أقل من 6000 جنيه مصري	ريف	شهادات عليا	جامعة بكالوريوس /دبلوم	ابتدائي	عامل	لا	لا	لا	لا	نعم	التلفاز, المدرسة, الأهل, الأصدقاء	نعم	نعم	ربما	نعم	نعم	نعم	لا	نعم	لا	نعم	لا	لا	نعم	ربما	نعم	لا	لا	نعم	ربما	ربما	نعم	لا	ربما	ربما	ربما	لا
أنثى	18-25 سنة	أعزب\عزباء	أقل من 6000 جنيه مصري	مدينة	شهادات عليا	شهادات عليا	جامعة بكالوريوس /دبلوم	عامل	لا	نعم	لا	لا	نعم	الأهل	نعم	نعم	نعم	نعم	نعم	لا	لا	لا	لا	لا	لا	لا	نعم	لا	لا	لا	لا	نعم	نعم	نعم	نعم	نعم	نعم	نعم	لا	لا
أنثى	18-25 سنة	أعزب\عزباء	أقل من 6000 جنيه مصري	ريف	شهادات عليا	شهادات عليا	شهادات عليا	عامل	لا	لا	لا	لا	نعم	أخرى	نعم	نعم	لا	نعم	نعم	لا	لا	لا	لا	لا	ربما	ربما	ربما	لا	ربما	لا	لا	لا	نعم	نعم	نعم	نعم	نعم	نعم	لا	لا
ذكر	18-25 سنة	أعزب\عزباء	6000-12000 جنيه مصري	مدينة	جامعة بكالوريوس /دبلوم	ثانوي	ثانوي	طالب	لا	لا	ليس لدي شريك	لا	نعم	الإنترنت	نعم	لا	لا	نعم	نعم	لا	لا	لا	لا	ربما	ربما	لا	ربما	ربما	لا	لا	لا	لا	نعم	نعم	نعم	نعم	نعم	نعم	لا	لا
أنثى	18-25 سنة	أعزب\عزباء	6000-12000 جنيه مصري	مدينة	جامعة بكالوريوس /دبلوم	جامعة بكالوريوس /دبلوم	جامعة بكالوريوس /دبلوم	طالب	نعم	لا	ليس لدي شريك	لا	نعم	الإنترنت, المدرسة, الصحف - الكتب - المجلات	نعم	نعم	نعم	لا	نعم	لا	لا	لا	لا	لا	ربما	لا	ربما	لا	نعم	ربما	لا	ربما	نعم	ربما	نعم	ربما	لا	لا	ربما	لا
ذكر	18-25 سنة	أعزب\عزباء	6000-12000 جنيه مصري	مدينة	جامعة بكالوريوس /دبلوم	ثانوي	جامعة بكالوريوس /دبلوم	طالب	نعم	نعم	لا	نعم	لا	الإنترنت, الطبيب	نعم	ربما	نعم	نعم	نعم	نعم	لا	نعم	لا	لا	نعم	ربما	لا	لا	لا	لا	لا	لا	نعم	نعم	نعم	نعم	نعم	لا	لا	لا
ذكر	18-25 سنة	أعزب\عزباء	أكثر من 12000 جنيه مصري	مدينة	جامعة بكالوريوس /دبلوم	جامعة بكالوريوس /دبلوم	جامعة بكالوريوس /دبلوم	طالب	نعم	لا	ليس لدي شريك	لا	نعم	الإنترنت	نعم	نعم	نعم	لا	نعم	لا	لا	نعم	لا	لا	نعم	لا	لا	لا	لا	لا	لا	لا	نعم	نعم	نعم	نعم	لا	لا	لا	لا
ذكر	18-25 سنة	أعزب\عزباء	أكثر من 12000 جنيه مصري	مدينة	جامعة بكالوريوس /دبلوم	شهادات عليا	جامعة بكالوريوس /دبلوم	طالب	نعم	نعم	ليس لدي شريك	لا	نعم	الأهل	نعم	نعم	لا	ربما	نعم	لا	لا	لا	لا	لا	ربما	لا	نعم	لا	لا	ربما	لا	نعم	نعم	نعم	نعم	نعم	ربما	ربما	لا	لا
أنثى	18-25 سنة	أعزب\عزباء	6000-12000 جنيه مصري	مدينة	ثانوي	شهادات عليا	جامعة بكالوريوس /دبلوم	طالب	نعم	نعم	لا	لا	نعم	الإنترنت	نعم	نعم	ربما	ربما	نعم	لا	لا	لا	لا	لا	لا	لا	ربما	لا	ربما	لا	لا	ربما	ربما	نعم	ربما	نعم	ربما	ربما	لا	لا
ذكر	18-25 سنة	أعزب\عزباء	أكثر من 12000 جنيه مصري	ريف	شهادات عليا	جامعة بكالوريوس /دبلوم	شهادات عليا	طالب	لا	لا	لا	لا	نعم	أخرى	نعم	لا	نعم	لا	نعم	لا	لا	لا	لا	لا	لا	لا	نعم	لا	ربما	لا	لا	لا	لا	نعم	نعم	نعم	لا	لا	نعم	لا
أنثى	18-25 سنة	أعزب\عزباء	6000-12000 جنيه مصري	ريف	جامعة بكالوريوس /دبلوم	جامعة بكالوريوس /دبلوم	جامعة بكالوريوس /دبلوم	طالب	لا	نعم	لا	لا	نعم	الإنترنت, التلفاز, الصحف - الكتب - المجلات	نعم	نعم	لا	ربما	نعم	لا	لا	لا	لا	لا	لا	ربما	لا	ربما	ربما	لا	لا	ربما	نعم	نعم	نعم	نعم	ربما	ربما	لا	لا
ذكر	18-25 سنة	أعزب\عزباء	6000-12000 جنيه مصري	ريف	جامعة بكالوريوس /دبلوم	جامعة بكالوريوس /دبلوم	جامعة بكالوريوس /دبلوم	طالب	نعم	لا	ليس لدي شريك	لا	نعم	الإنترنت, التلفاز	نعم	لا	ربما	لا	نعم	لا	لا	لا	لا	لا	ربما	لا	ربما	لا	ربما	لا	لا	ربما	نعم	نعم	نعم	نعم	ربما	ربما	لا	لا
ذكر	18-25 سنة	أعزب\عزباء	أقل من 6000 جنيه مصري	مدينة	جامعة بكالوريوس /دبلوم	جامعة بكالوريوس /دبلوم	ثانوي	طالب	نعم	لا	ليس لدي شريك	لا	نعم	الإنترنت, التلفاز	نعم	نعم	ربما	ربما	نعم	لا	لا	لا	لا	لا	نعم	نعم	ربما	لا	ربما	لا	لا	ربما	نعم	نعم	نعم	نعم	ربما	ربما	لا	لا
ذكر	18-25 سنة	أعزب\عزباء	أقل من 6000 جنيه مصري	ريف	جامعة بكالوريوس /دبلوم	شهادات عليا	ثانوي	طالب	نعم	لا	ليس لدي شريك	لا	نعم	الإنترنت, التلفاز, الصحف - الكتب - المجلات	نعم	نعم	نعم	ربما	نعم	لا	لا	لا	لا	ربما	ربما	ربما	ربما	ربما	ربما	لا	لا	نعم	ربما	نعم	نعم	نعم	ربما	ربما	لا	لا
أنثى	18-25 سنة	أعزب\عزباء	6000-12000 جنيه مصري	مدينة	جامعة بكالوريوس /دبلوم	جامعة بكالوريوس /دبلوم	جامعة بكالوريوس /دبلوم	طالب	نعم	لا	ليس لدي شريك	لا	نعم	الإنترنت, التلفاز, المدرسة, الطبيب	نعم	لا	نعم	لا	نعم	لا	لا	لا	لا	لا	نعم	لا	نعم	لا	نعم	لا	لا	لا	نعم	نعم	نعم	نعم	نعم	نعم	لا	لا
أنثى	18-25 سنة	أعزب\عزباء	أكثر من 12000 جنيه مصري	مدينة	جامعة بكالوريوس /دبلوم	شهادات عليا	جامعة بكالوريوس /دبلوم	طالب	نعم	لا	ليس لدي شريك	لا	نعم	الإنترنت, الصحف - الكتب - المجلات	نعم	لا	نعم	ربما	نعم	لا	لا	لا	لا	لا	لا	لا	ربما	لا	ربما	لا	لا	ربما	نعم	نعم	نعم	نعم	نعم	نعم	لا	لا
ذكر	18-25 سنة	أعزب\عزباء	6000-12000 جنيه مصري	ريف	ثانوي	جامعة بكالوريوس /دبلوم	جامعة بكالوريوس /دبلوم	طالب	لا	لا	ليس لدي شريك	لا	نعم	الأهل, الأصدقاء	نعم	ربما	لا	لا	لا	لا	لا	لا	لا	ربما	ربما	ربما	ربما	لا	لا	ربما	لا	نعم	نعم	نعم	نعم	نعم	لا	لا	لا	لا
ذكر	18-25 سنة	أعزب\عزباء	أقل من 6000 جنيه مصري	مدينة	جامعة بكالوريوس /دبلوم	شهادات عليا	شهادات عليا	طالب	نعم	لا	ليس لدي شريك	لا	نعم	الإنترنت, الأهل, الأصدقاء	نعم	نعم	ربما	ربما	نعم	لا	لا	لا	لا	لا	ربما	لا	لا	لا	ربما	لا	لا	ربما	نعم	نعم	نعم	نعم	لا	لا	نعم	لا
ذكر	18-25 سنة	أعزب\عزباء	6000-12000 جنيه مصري	ريف	جامعة بكالوريوس /دبلوم	جامعة بكالوريوس /دبلوم	جامعة بكالوريوس /دبلوم	طالب	نعم	لا	ليس لدي شريك	لا	نعم	الأصدقاء	لا	لا	لا	لا	نعم	لا	لا	لا	لا	لا	لا	لا	نعم	لا	لا	لا	لا	لا	نعم	نعم	نعم	نعم	لا	لا	لا	لا
أنثى	18-25 سنة	أعزب\عزباء	6000-12000 جنيه مصري	مدينة	جامعة بكالوريوس /دبلوم	جامعة بكالوريوس /دبلوم	جامعة بكالوريوس /دبلوم	طالب	نعم	لا	ليس لدي شريك	لا	نعم	الإنترنت, التلفاز, المدرسة	نعم	ربما	لا	ربما	نعم	لا	لا	لا	لا	لا	لا	لا	ربما	لا	ربما	لا	لا	ربما	نعم	نعم	نعم	نعم	نعم	ربما	لا	لا
ذكر	18-25 سنة	أعزب\عزباء	أكثر من 12000 جنيه مصري	مدينة	ثانوي	جامعة بكالوريوس /دبلوم	ثانوي	طالب	نعم	لا	ليس لدي شريك	لا	نعم	الإنترنت, التلفاز, الأهل, الأصدقاء	نعم	نعم	نعم	ربما	نعم	لا	لا	لا	لا	لا	نعم	لا	ربما	ربما	ربما	لا	لا	ربما	نعم	نعم	نعم	نعم	نعم	نعم	لا	لا
أنثى	18-25 سنة	أعزب\عزباء	6000-12000 جنيه مصري	مدينة	ثانوي	جامعة بكالوريوس /دبلوم	جامعة بكالوريوس /دبلوم	طالب	نعم	لا	ليس لدي شريك	لا	نعم	الإنترنت, التلفاز, المدرسة, الأهل, الصحف - الكتب - المجلات	نعم	ربما	ربما	ربما	نعم	لا	لا	لا	لا	لا	ربما	ربما	ربما	لا	ربما	لا	لا	ربما	نعم	نعم	نعم	نعم	نعم	نعم	لا	لا
أنثى	18-25 سنة	أعزب\عزباء	6000-12000 جنيه مصري	مدينة	جامعة بكالوريوس /دبلوم	جامعة بكالوريوس /دبلوم	جامعة بكالوريوس /دبلوم	طالب	نعم	لا	ليس لدي شريك	لا	نعم	الإنترنت, التلفاز, الصحف - الكتب - المجلات	نعم	نعم	نعم	نعم	ربما	لا	لا	لا	لا	لا	لا	لا	لا	لا	ربما	لا	لا	نعم	نعم	نعم	نعم	نعم	نعم	نعم	لا	لا
ذكر	18-25 سنة	أعزب\عزباء	أقل من 6000 جنيه مصري	مدينة	جامعة بكالوريوس /دبلوم	شهادات عليا	شهادات عليا	عامل	نعم	لا	ليس لدي شريك	لا	نعم	الإنترنت	نعم	نعم	ربما	ربما	نعم	لا	لا	لا	لا	لا	نعم	لا	لا	لا	لا	لا	لا	لا	نعم	نعم	نعم	نعم	لا	لا	لا	لا
أنثى	18-25 سنة	أعزب\عزباء	6000-12000 جنيه مصري	ريف	جامعة بكالوريوس /دبلوم	جامعة بكالوريوس /دبلوم	جامعة بكالوريوس /دبلوم	طالب	لا	نعم	ليس لدي شريك	لا	نعم	الصحف - الكتب - المجلات	نعم	نعم	نعم	نعم	نعم	لا	لا	لا	لا	لا	نعم	لا	نعم	لا	لا	نعم	ربما	نعم	نعم	نعم	نعم	نعم	نعم	نعم	لا	لا
ذكر	18-25 سنة	أعزب\عزباء	أقل من 6000 جنيه مصري	مدينة	جامعة بكالوريوس /دبلوم	شهادات عليا	جامعة بكالوريوس /دبلوم	طالب	نعم	لا	ليس لدي شريك	لا	نعم	الإنترنت, التلفاز, الصحف - الكتب - المجلات	نعم	لا	نعم	لا	نعم	لا	لا	لا	لا	لا	لا	لا	نعم	لا	لا	لا	لا	ربما	نعم	نعم	نعم	نعم	نعم	نعم	لا	لا
أنثى	18-25 سنة	أعزب\عزباء	أكثر من 12000 جنيه مصري	مدينة	جامعة بكالوريوس /دبلوم	جامعة بكالوريوس /دبلوم	جامعة بكالوريوس /دبلوم	طالب	نعم	لا	ليس لدي شريك	لا	نعم	الإنترنت, التلفاز	نعم	نعم	ربما	ربما	نعم	لا	لا	لا	لا	لا	ربما	ربما	ربما	لا	نعم	لا	ربما	لا	نعم	نعم	نعم	ربما	ربما	نعم	لا	لا
أنثى	18-25 سنة	أعزب\عزباء	أكثر من 12000 جنيه مصري	مدينة	جامعة بكالوريوس /دبلوم	ثانوي	جامعة بكالوريوس /دبلوم	طالب	نعم	لا	ليس لدي شريك	لا	نعم	الطبيب, أخرى	نعم	نعم	نعم	نعم	نعم	لا	لا	لا	لا	لا	ربما	لا	نعم	لا	نعم	لا	لا	نعم	نعم	نعم	نعم	نعم	نعم	نعم	لا	لا
ذكر	18-25 سنة	أعزب\عزباء	أكثر من 12000 جنيه مصري	مدينة	جامعة بكالوريوس /دبلوم	جامعة بكالوريوس /دبلوم	جامعة بكالوريوس /دبلوم	طالب	نعم	لا	ليس لدي شريك	لا	نعم	الأصدقاء	نعم	ربما	لا	نعم	لا	ربما	ربما	ربما	ربما	ربما	ربما	ربما	ربما	نعم	ربما	لا	ربما	ربما	نعم	نعم	نعم	نعم	نعم	ربما	لا	لا
ذكر	18-25 سنة	أعزب\عزباء	6000-12000 جنيه مصري	مدينة	جامعة بكالوريوس /دبلوم	جامعة بكالوريوس /دبلوم	جامعة بكالوريوس /دبلوم	عامل	لا	لا	لا	لا	نعم	الصحف - الكتب - المجلات	نعم	نعم	لا	ربما	ربما	لا	لا	ربما	لا	لا	ربما	لا	ربما	لا	لا	لا	لا	نعم	نعم	نعم	نعم	نعم	ربما	ربما	لا	لا
أنثى	18-25 سنة	متزوج/ة	6000-12000 جنيه مصري	مدينة	جامعة بكالوريوس /دبلوم	جامعة بكالوريوس /دبلوم	جامعة بكالوريوس /دبلوم	عامل	نعم	لا	لا	لا	نعم	الصحف - الكتب - المجلات, الطبيب	نعم	نعم	ربما	ربما	نعم	لا	لا	لا	لا	لا	نعم	لا	نعم	لا	لا	لا	لا	نعم	نعم	نعم	نعم	نعم	ربما	ربما	لا	لا
أنثى	18-25 سنة	أعزب\عزباء	أكثر من 12000 جنيه مصري	مدينة	جامعة بكالوريوس /دبلوم	ابتدائي	ثانوي	طالب	لا	نعم	ليس لدي شريك	لا	نعم	الأهل	نعم	نعم	نعم	نعم	نعم	ربما	لا	ربما	ربما	لا	ربما	لا	لا	لا	ربما	لا	لا	نعم	نعم	نعم	نعم	نعم	نعم	نعم	لا	لا
ذكر	18-25 سنة	أعزب\عزباء	6000-12000 جنيه مصري	مدينة	جامعة بكالوريوس /دبلوم	جامعة بكالوريوس /دبلوم	شهادات عليا	طالب	نعم	لا	ليس لدي شريك	لا	نعم	الإنترنت, التلفاز, الأهل, الصحف - الكتب - المجلات	نعم	ربما	ربما	لا	نعم	لا	لا	لا	لا	لا	نعم	لا	ربما	ربما	نعم	لا	لا	ربما	ربما	نعم	نعم	نعم	لا	لا	ربما	لا
ذكر	18-25 سنة	أعزب\عزباء	أكثر من 12000 جنيه مصري	مدينة	جامعة بكالوريوس /دبلوم	جامعة بكالوريوس /دبلوم	شهادات عليا	طالب	نعم	لا	ليس لدي شريك	لا	نعم	الإنترنت, الأصدقاء	ربما	نعم	لا	ربما	نعم	لا	لا	لا	لا	لا	ربما	ربما	ربما	لا	ربما	لا	ربما	ربما	نعم	نعم	نعم	نعم	ربما	ربما	لا	لا
أنثى	18-25 سنة	أعزب\عزباء	أكثر من 12000 جنيه مصري	ريف	جامعة بكالوريوس /دبلوم	شهادات عليا	شهادات عليا	طالب	نعم	لا	ليس لدي شريك	لا	نعم	الإنترنت, المدرسة, الأصدقاء, الصحف - الكتب - المجلات, الطبيب	نعم	نعم	نعم	لا	ربما	لا	لا	لا	لا	لا	لا	لا	نعم	لا	لا	لا	لا	لا	نعم	نعم	نعم	نعم	لا	ربما	لا	ربما
أنثى	18-25 سنة	أعزب\عزباء	6000-12000 جنيه مصري	ريف	ثانوي	ثانوي	ثانوي	طالب	نعم	لا	لا	لا	نعم	الأصدقاء	نعم	نعم	ربما	ربما	نعم	لا	لا	لا	لا	لا	نعم	نعم	نعم	لا	ربما	لا	لا	ربما	نعم	نعم	نعم	نعم	لا	نعم	ربما	لا
ذكر	18-25 سنة	أعزب\عزباء	6000-12000 جنيه مصري	مدينة	جامعة بكالوريوس /دبلوم	ثانوي	ابتدائي	طالب	نعم	لا	ليس لدي شريك	لا	نعم	الإنترنت, المدرسة, الأصدقاء	ربما	نعم	ربما	ربما	نعم	لا	لا	لا	لا	لا	ربما	لا	لا	لا	نعم	لا	لا	ربما	نعم	نعم	نعم	نعم	ربما	ربما	لا	لا
أنثى	18-25 سنة	أعزب\عزباء	أكثر من 12000 جنيه مصري	مدينة	جامعة بكالوريوس /دبلوم	جامعة بكالوريوس /دبلوم	جامعة بكالوريوس /دبلوم	طالب	نعم	لا	ليس لدي شريك	لا	نعم	الإنترنت, التلفاز, المدرسة, الأصدقاء	نعم	نعم	ربما	ربما	ربما	لا	لا	لا	لا	لا	لا	لا	ربما	لا	ربما	ربما	لا	لا	نعم	نعم	نعم	نعم	ربما	ربما	ربما	لا
أنثى	18-25 سنة	أعزب\عزباء	6000-12000 جنيه مصري	مدينة	ثانوي	جامعة بكالوريوس /دبلوم	جامعة بكالوريوس /دبلوم	طالب	نعم	لا	ليس لدي شريك	لا	نعم	الإنترنت, التلفاز, الأهل, الصحف - الكتب - المجلات	لا	ربما	ربما	ربما	نعم	لا	لا	لا	لا	لا	لا	لا	لا	لا	لا	لا	لا	ربما	نعم	نعم	نعم	نعم	نعم	نعم	لا	لا
ذكر	18-25 سنة	أعزب\عزباء	أكثر من 12000 جنيه مصري	ريف	جامعة بكالوريوس /دبلوم	جامعة بكالوريوس /دبلوم	جامعة بكالوريوس /دبلوم	طالب	نعم	لا	ليس لدي شريك	لا	نعم	الإنترنت, الطبيب	نعم	نعم	نعم	نعم	نعم	لا	لا	لا	لا	لا	نعم	نعم	نعم	لا	لا	لا	لا	لا	نعم	نعم	نعم	نعم	لا	نعم	لا	لا
أنثى	18-25 سنة	أعزب\عزباء	أقل من 6000 جنيه مصري	ريف	جامعة بكالوريوس /دبلوم	جامعة بكالوريوس /دبلوم	جامعة بكالوريوس /دبلوم	عامل	نعم	لا	لا	لا	نعم	أخرى	نعم	نعم	ربما	نعم	نعم	لا	لا	لا	لا	ربما	لا	لا	ربما	لا	لا	لا	لا	ربما	نعم	نعم	نعم	نعم	ربما	ربما	ربما	لا
أنثى	18-25 سنة	أعزب\عزباء	6000-12000 جنيه مصري	مدينة	جامعة بكالوريوس /دبلوم	شهادات عليا	جامعة بكالوريوس /دبلوم	طالب	نعم	لا	ليس لدي شريك	لا	نعم	الإنترنت, التلفاز, الصحف - الكتب - المجلات	نعم	ربما	نعم	نعم	نعم	لا	لا	لا	لا	لا	ربما	لا	نعم	ربما	نعم	ربما	لا	ربما	نعم	نعم	نعم	نعم	ربما	لا	لا	لا
أنثى	18-25 سنة	أعزب\عزباء	أقل من 6000 جنيه مصري	ريف	جامعة بكالوريوس /دبلوم	جامعة بكالوريوس /دبلوم	جامعة بكالوريوس /دبلوم	طالب	لا	نعم	ليس لدي شريك	لا	نعم	الأهل	نعم	نعم	لا	ربما	نعم	لا	لا	لا	لا	لا	ربما	لا	نعم	لا	ربما	لا	لا	نعم	نعم	نعم	نعم	نعم	نعم	نعم	لا	لا
أنثى	18-25 سنة	أعزب\عزباء	6000-12000 جنيه مصري	مدينة	جامعة بكالوريوس /دبلوم	شهادات عليا	جامعة بكالوريوس /دبلوم	طالب	نعم	لا	ليس لدي شريك	لا	نعم	الإنترنت	نعم	نعم	ربما	ربما	نعم	لا	لا	لا	لا	لا	ربما	لا	ربما	لا	ربما	لا	لا	لا	نعم	نعم	نعم	نعم	ربما	ربما	لا	لا
أنثى	18-25 سنة	أعزب\عزباء	أكثر من 12000 جنيه مصري	ريف	جامعة بكالوريوس /دبلوم	جامعة بكالوريوس /دبلوم	جامعة بكالوريوس /دبلوم	طالب	لا	لا	لا	لا	نعم	الإنترنت, التلفاز, الأهل, الأصدقاء, الصحف - الكتب - المجلات	نعم	نعم	نعم	لا	نعم	لا	لا	لا	لا	لا	لا	لا	نعم	لا	لا	لا	لا	لا	نعم	نعم	نعم	نعم	نعم	نعم	لا	لا
أنثى	18-25 سنة	أعزب\عزباء	6000-12000 جنيه مصري	ريف	جامعة بكالوريوس /دبلوم	شهادات عليا	شهادات عليا	طالب	نعم	لا	ليس لدي شريك	لا	نعم	الإنترنت, التلفاز	نعم	نعم	لا	ربما	نعم	لا	لا	لا	لا	لا	لا	لا	ربما	لا	لا	ربما	لا	نعم	نعم	نعم	نعم	نعم	ربما	ربما	ربما	لا
أنثى	18-25 سنة	أعزب\عزباء	أقل من 6000 جنيه مصري	مدينة	جامعة بكالوريوس /دبلوم	ثانوي	ثانوي	طالب	نعم	لا	ليس لدي شريك	لا	نعم	الإنترنت	ربما	ربما	نعم	نعم	نعم	لا	لا	ربما	لا	ربما	ربما	ربما	ربما	لا	ربما	ربما	لا	ربما	نعم	نعم	نعم	ربما	لا	لا	لا	لا
أنثى	18-25 سنة	أعزب\عزباء	6000-12000 جنيه مصري	مدينة	جامعة بكالوريوس /دبلوم	جامعة بكالوريوس /دبلوم	شهادات عليا	طالب	نعم	لا	لا	لا	نعم	الإنترنت, التلفاز, الصحف - الكتب - المجلات	نعم	نعم	نعم	نعم	نعم	لا	لا	لا	لا	لا	نعم	لا	نعم	لا	ربما	لا	ربما	لا	نعم	نعم	نعم	نعم	ربما	ربما	لا	لا
أنثى	18-25 سنة	أعزب\عزباء	6000-12000 جنيه مصري	ريف	جامعة بكالوريوس /دبلوم	ثانوي	ثانوي	طالب	لا	لا	ليس لدي شريك	لا	نعم	الإنترنت	ربما	لا	ربما	ربما	نعم	لا	لا	ربما	لا	لا	ربما	لا	ربما	لا	ربما	لا	لا	ربما	نعم	نعم	نعم	نعم	ربما	ربما	لا	لا
أنثى	18-25 سنة	أعزب\عزباء	أكثر من 12000 جنيه مصري	ريف	جامعة بكالوريوس /دبلوم	شهادات عليا	شهادات عليا	طالب	نعم	لا	ليس لدي شريك	لا	نعم	الإنترنت, المدرسة, الأهل	نعم	ربما	نعم	ربما	نعم	لا	لا	لا	لا	لا	ربما	لا	ربما	ربما	ربما	لا	لا	لا	نعم	نعم	نعم	نعم	نعم	نعم	لا	لا
أنثى	18-25 سنة	أعزب\عزباء	6000-12000 جنيه مصري	مدينة	جامعة بكالوريوس /دبلوم	جامعة بكالوريوس /دبلوم	جامعة بكالوريوس /دبلوم	عامل	نعم	لا	لا	لا	نعم	الأصدقاء	نعم	لا	لا	ربما	نعم	لا	لا	لا	لا	لا	لا	لا	لا	لا	لا	لا	لا	ربما	نعم	نعم	نعم	نعم	نعم	نعم	لا	لا
ذكر	26-35 سنة	متزوج/ة	أقل من 6000 جنيه مصري	مدينة	جامعة بكالوريوس /دبلوم	جامعة بكالوريوس /دبلوم	جامعة بكالوريوس /دبلوم	عامل	لا	لا	لا	لا	نعم	أخرى	نعم	ربما	لا	ربما	نعم	نعم	لا	نعم	لا	نعم	ربما	ربما	لا	ربما	ربما	لا	لا	نعم	نعم	نعم	نعم	نعم	نعم	نعم	لا	لا
أنثى	18-25 سنة	أعزب\عزباء	أقل من 6000 جنيه مصري	مدينة	جامعة بكالوريوس /دبلوم	جامعة بكالوريوس /دبلوم	جامعة بكالوريوس /دبلوم	طالب	نعم	لا	ليس لدي شريك	لا	نعم	الإنترنت	نعم	نعم	نعم	لا	نعم	لا	لا	لا	لا	لا	نعم	لا	لا	لا	نعم	لا	لا	لا	نعم	ربما	ربما	لا	لا	لا	ربما	ربما
أنثى	18-25 سنة	أعزب\عزباء	أقل من 6000 جنيه مصري	مدينة	جامعة بكالوريوس /دبلوم	شهادات عليا	جامعة بكالوريوس /دبلوم	طالب	نعم	لا	ليس لدي شريك	لا	نعم	الإنترنت	نعم	نعم	ربما	نعم	نعم	لا	لا	لا	لا	ربما	نعم	لا	ربما	لا	لا	ربما	ربما	لا	ربما	ربما	ربما	ربما	لا	لا	نعم	لا
أنثى	18-25 سنة	أعزب\عزباء	أكثر من 12000 جنيه مصري	مدينة	جامعة بكالوريوس /دبلوم	جامعة بكالوريوس /دبلوم	جامعة بكالوريوس /دبلوم	طالب	نعم	لا	ليس لدي شريك	لا	نعم	الإنترنت, التلفاز	نعم	نعم	لا	ربما	نعم	لا	لا	لا	لا	لا	ربما	لا	نعم	لا	ربما	لا	لا	لا	نعم	نعم	نعم	نعم	نعم	نعم	لا	لا
أنثى	18-25 سنة	أعزب\عزباء	6000-12000 جنيه مصري	مدينة	جامعة بكالوريوس /دبلوم	جامعة بكالوريوس /دبلوم	جامعة بكالوريوس /دبلوم	طالب	لا	لا	لا	لا	نعم	الإنترنت	نعم	ربما	لا	لا	نعم	لا	لا	لا	لا	ربما	ربما	ربما	لا	ربما	ربما	لا	لا	نعم	نعم	نعم	نعم	نعم	نعم	نعم	لا	لا
أنثى	18-25 سنة	أعزب\عزباء	6000-12000 جنيه مصري	مدينة	جامعة بكالوريوس /دبلوم	جامعة بكالوريوس /دبلوم	جامعة بكالوريوس /دبلوم	طالب	نعم	لا	ليس لدي شريك	لا	نعم	أخرى	نعم	نعم	لا	ربما	نعم	لا	لا	لا	لا	لا	لا	لا	لا	لا	لا	لا	لا	ربما	نعم	نعم	نعم	نعم	ربما	ربما	ربما	لا
أنثى	18-25 سنة	أعزب\عزباء	6000-12000 جنيه مصري	ريف	جامعة بكالوريوس /دبلوم	جامعة بكالوريوس /دبلوم	جامعة بكالوريوس /دبلوم	طالب	نعم	لا	ليس لدي شريك	لا	نعم	الإنترنت	نعم	لا	لا	نعم	نعم	لا	لا	لا	لا	لا	نعم	لا	لا	لا	لا	لا	لا	لا	نعم	نعم	نعم	نعم	نعم	نعم	لا	لا
أنثى	18-25 سنة	أعزب\عزباء	6000-12000 جنيه مصري	مدينة	ثانوي	جامعة بكالوريوس /دبلوم	جامعة بكالوريوس /دبلوم	طالب	نعم	لا	لا	لا	نعم	الإنترنت, المدرسة, الصحف - الكتب - المجلات	نعم	ربما	ربما	لا	نعم	لا	لا	لا	لا	ربما	نعم	لا	نعم	لا	لا	لا	لا	ربما	نعم	نعم	نعم	نعم	ربما	ربما	ربما	لا
ذكر	18-25 سنة	أعزب\عزباء	6000-12000 جنيه مصري	مدينة	جامعة بكالوريوس /دبلوم	جامعة بكالوريوس /دبلوم	جامعة بكالوريوس /دبلوم	طالب	نعم	لا	ليس لدي شريك	لا	نعم	المدرسة	نعم	ربما	لا	ربما	نعم	لا	لا	لا	لا	لا	ربما	لا	ربما	لا	لا	لا	لا	لا	نعم	نعم	نعم	نعم	نعم	نعم	لا	لا
ذكر	18-25 سنة	أعزب\عزباء	6000-12000 جنيه مصري	ريف	جامعة بكالوريوس /دبلوم	جامعة بكالوريوس /دبلوم	ثانوي	طالب	نعم	لا	ليس لدي شريك	لا	نعم	الإنترنت, التلفاز, الأصدقاء, الصحف - الكتب - المجلات, الطبيب	نعم	نعم	نعم	ربما	نعم	نعم	ربما	نعم	ربما	نعم	ربما	لا	ربما	ربما	لا	لا	ربما	نعم	نعم	نعم	نعم	ربما	نعم	نعم	ربما	لا
أنثى	18-25 سنة	أعزب\عزباء	6000-12000 جنيه مصري	ريف	جامعة بكالوريوس /دبلوم	جامعة بكالوريوس /دبلوم	جامعة بكالوريوس /دبلوم	طالب	نعم	لا	ليس لدي شريك	لا	نعم	أخرى	نعم	ربما	لا	لا	نعم	لا	لا	لا	لا	لا	لا	لا	لا	لا	لا	لا	لا	ربما	نعم	نعم	نعم	ربما	لا	لا	ربما	لا
ذكر	18-25 سنة	أعزب\عزباء	6000-12000 جنيه مصري	مدينة	جامعة بكالوريوس /دبلوم	جامعة بكالوريوس /دبلوم	جامعة بكالوريوس /دبلوم	طالب	نعم	لا	ليس لدي شريك	لا	نعم	الإنترنت, الأهل	ربما	ربما	لا	ربما	نعم	لا	لا	لا	لا	لا	ربما	لا	ربما	لا	ربما	لا	لا	ربما	نعم	نعم	نعم	نعم	نعم	نعم	لا	لا
أنثى	18-25 سنة	أعزب\عزباء	6000-12000 جنيه مصري	مدينة	جامعة بكالوريوس /دبلوم	جامعة بكالوريوس /دبلوم	جامعة بكالوريوس /دبلوم	طالب	نعم	لا	ليس لدي شريك	لا	نعم	الإنترنت, التلفاز, الأصدقاء	نعم	ربما	ربما	ربما	ربما	نعم	نعم	نعم	نعم	ربما	ربما	ربما	ربما	ربما	ربما	ربما	ربما	ربما	ربما	ربما	ربما	لا	لا	لا	ربما	لا
ذكر	18-25 سنة	أعزب\عزباء	أكثر من 12000 جنيه مصري	ريف	جامعة بكالوريوس /دبلوم	جامعة بكالوريوس /دبلوم	جامعة بكالوريوس /دبلوم	عامل	نعم	لا	لا	لا	نعم	الإنترنت, المدرسة, الصحف - الكتب - المجلات, أخرى	ربما	ربما	لا	لا	نعم	لا	لا	لا	لا	لا	لا	لا	ربما	لا	لا	لا	لا	ربما	ربما	نعم	نعم	ربما	ربما	ربما	ربما	ربما
أنثى	36-50 سنة	متزوج/ة	6000-12000 جنيه مصري	مدينة	جامعة بكالوريوس /دبلوم	ابتدائي	ابتدائي	عامل	لا	لا	لا	لا	نعم	الأهل, الأصدقاء	نعم	نعم	نعم	ربما	نعم	ربما	ربما	ربما	ربما	لا	ربما	لا	نعم	لا	ربما	لا	ربما	ربما	لا	نعم	ربما	نعم	لا	لا	ربما	لا
ذكر	18-25 سنة	أعزب\عزباء	أقل من 6000 جنيه مصري	ريف	جامعة بكالوريوس /دبلوم	جامعة بكالوريوس /دبلوم	جامعة بكالوريوس /دبلوم	طالب	نعم	لا	ليس لدي شريك	لا	نعم	الأهل, الأصدقاء	ربما	نعم	لا	ربما	نعم	لا	لا	لا	لا	لا	لا	لا	لا	ربما	ربما	لا	لا	ربما	نعم	نعم	نعم	نعم	لا	لا	لا	لا
أنثى	18-25 سنة	أعزب\عزباء	أكثر من 12000 جنيه مصري	مدينة	جامعة بكالوريوس /دبلوم	جامعة بكالوريوس /دبلوم	جامعة بكالوريوس /دبلوم	طالب	لا	لا	ليس لدي شريك	لا	نعم	الإنترنت	نعم	ربما	لا	ربما	نعم	لا	لا	لا	لا	لا	ربما	لا	لا	لا	ربما	لا	لا	ربما	نعم	نعم	نعم	نعم	نعم	نعم	لا	لا
أنثى	18-25 سنة	أعزب\عزباء	6000-12000 جنيه مصري	ريف	جامعة بكالوريوس /دبلوم	جامعة بكالوريوس /دبلوم	جامعة بكالوريوس /دبلوم	طالب	نعم	لا	ليس لدي شريك	لا	نعم	الإنترنت, التلفاز, الأهل, الصحف - الكتب - المجلات, الطبيب	ربما	ربما	لا	لا	نعم	لا	لا	لا	لا	لا	لا	لا	ربما	لا	لا	لا	لا	لا	نعم	نعم	نعم	نعم	نعم	نعم	لا	لا
أنثى	18-25 سنة	أعزب\عزباء	أقل من 6000 جنيه مصري	مدينة	جامعة بكالوريوس /دبلوم	شهادات عليا	جامعة بكالوريوس /دبلوم	طالب	نعم	لا	ليس لدي شريك	لا	نعم	المدرسة	ربما	ربما	ربما	ربما	ربما	ربما	ربما	ربما	ربما	ربما	ربما	ربما	ربما	ربما	ربما	ربما	ربما	ربما	ربما	ربما	ربما	ربما	ربما	ربما	ربما	ربما
ذكر	18-25 سنة	أعزب\عزباء	6000-12000 جنيه مصري	ريف	جامعة بكالوريوس /دبلوم	ابتدائي	ابتدائي	طالب	نعم	لا	ليس لدي شريك	لا	نعم	الأصدقاء	نعم	نعم	نعم	لا	نعم	لا	لا	لا	لا	لا	نعم	لا	ربما	لا	لا	لا	لا	ربما	نعم	نعم	نعم	نعم	لا	ربما	نعم	لا
ذكر	18-25 سنة	أعزب\عزباء	6000-12000 جنيه مصري	مدينة	جامعة بكالوريوس /دبلوم	شهادات عليا	شهادات عليا	طالب	نعم	لا	ليس لدي شريك	لا	نعم	المدرسة	نعم	ربما	لا	لا	نعم	لا	لا	لا	لا	لا	نعم	لا	ربما	لا	ربما	لا	لا	ربما	نعم	نعم	نعم	نعم	نعم	ربما	لا	لا
أنثى	18-25 سنة	أعزب\عزباء	6000-12000 جنيه مصري	ريف	جامعة بكالوريوس /دبلوم	جامعة بكالوريوس /دبلوم	جامعة بكالوريوس /دبلوم	عامل	لا	لا	لا	لا	نعم	الإنترنت, التلفاز, الصحف - الكتب - المجلات	نعم	لا	ربما	لا	نعم	لا	لا	لا	لا	لا	لا	لا	نعم	لا	لا	لا	لا	لا	نعم	نعم	نعم	نعم	لا	لا	لا	لا
أنثى	18-25 سنة	أعزب\عزباء	6000-12000 جنيه مصري	ريف	جامعة بكالوريوس /دبلوم	جامعة بكالوريوس /دبلوم	جامعة بكالوريوس /دبلوم	طالب	نعم	نعم	ليس لدي شريك	لا	نعم	الإنترنت, التلفاز, الأهل, الصحف - الكتب - المجلات, أخرى	نعم	نعم	لا	نعم	نعم	لا	لا	لا	لا	لا	لا	لا	لا	لا	لا	لا	لا	نعم	نعم	نعم	نعم	نعم	نعم	نعم	لا	لا
أنثى	18-25 سنة	أعزب\عزباء	أكثر من 12000 جنيه مصري	مدينة	جامعة بكالوريوس /دبلوم	شهادات عليا	شهادات عليا	طالب	نعم	لا	ليس لدي شريك	لا	نعم	الإنترنت	نعم	ربما	لا	لا	نعم	لا	لا	لا	لا	لا	لا	لا	ربما	لا	ربما	لا	لا	ربما	نعم	نعم	نعم	نعم	نعم	نعم	لا	لا
أنثى	18-25 سنة	أعزب\عزباء	6000-12000 جنيه مصري	ريف	جامعة بكالوريوس /دبلوم	جامعة بكالوريوس /دبلوم	جامعة بكالوريوس /دبلوم	طالب	نعم	لا	لا	لا	نعم	الإنترنت	نعم	لا	لا	نعم	نعم	لا	لا	لا	لا	لا	لا	لا	ربما	لا	لا	لا	لا	نعم	نعم	نعم	نعم	نعم	نعم	نعم	لا	لا
أنثى	18-25 سنة	أعزب\عزباء	أقل من 6000 جنيه مصري	مدينة	جامعة بكالوريوس /دبلوم	جامعة بكالوريوس /دبلوم	جامعة بكالوريوس /دبلوم	طالب	نعم	لا	ليس لدي شريك	لا	نعم	الإنترنت, التلفاز, المدرسة, الأهل, الأصدقاء, الصحف - الكتب - المجلات, أخرى	نعم	ربما	نعم	نعم	نعم	لا	لا	لا	لا	لا	لا	لا	ربما	لا	لا	لا	لا	ربما	نعم	نعم	نعم	ربما	لا	لا	نعم	نعم
أنثى	18-25 سنة	أعزب\عزباء	أكثر من 12000 جنيه مصري	مدينة	جامعة بكالوريوس /دبلوم	جامعة بكالوريوس /دبلوم	ثانوي	طالب	نعم	لا	لا	لا	نعم	الإنترنت, المدرسة, الأهل, الصحف - الكتب - المجلات, الطبيب, أخرى	نعم	ربما	ربما	ربما	ربما	لا	لا	لا	لا	لا	ربما	ربما	ربما	لا	ربما	لا	ربما	ربما	نعم	نعم	نعم	نعم	نعم	نعم	لا	لا
ذكر	18-25 سنة	أعزب\عزباء	6000-12000 جنيه مصري	مدينة	ثانوي	شهادات عليا	شهادات عليا	طالب	نعم	لا	ليس لدي شريك	لا	نعم	الإنترنت, المدرسة, الأهل, الأصدقاء, الطبيب	نعم	نعم	ربما	لا	نعم	لا	لا	لا	لا	لا	لا	لا	نعم	لا	ربما	لا	لا	ربما	نعم	نعم	نعم	نعم	ربما	ربما	لا	لا
أنثى	18-25 سنة	أعزب\عزباء	أكثر من 12000 جنيه مصري	مدينة	ثانوي	جامعة بكالوريوس /دبلوم	ثانوي	طالب	نعم	لا	ليس لدي شريك	لا	نعم	التلفاز, الصحف - الكتب - المجلات	نعم	نعم	لا	ربما	نعم	لا	لا	لا	لا	لا	ربما	لا	نعم	لا	لا	لا	لا	لا	نعم	نعم	نعم	نعم	نعم	نعم	نعم	لا
أنثى	18-25 سنة	أعزب\عزباء	أكثر من 12000 جنيه مصري	مدينة	جامعة بكالوريوس /دبلوم	جامعة بكالوريوس /دبلوم	شهادات عليا	طالب	نعم	لا	ليس لدي شريك	لا	نعم	الإنترنت, الصحف - الكتب - المجلات	نعم	نعم	لا	ربما	نعم	ربما	لا	لا	لا	لا	لا	لا	نعم	لا	لا	لا	لا	لا	نعم	نعم	نعم	نعم	ربما	ربما	لا	لا
أنثى	18-25 سنة	أعزب\عزباء	6000-12000 جنيه مصري	ريف	جامعة بكالوريوس /دبلوم	جامعة بكالوريوس /دبلوم	جامعة بكالوريوس /دبلوم	طالب	نعم	لا	ليس لدي شريك	لا	نعم	الإنترنت	نعم	نعم	ربما	لا	نعم	لا	لا	لا	لا	لا	لا	لا	لا	لا	نعم	لا	لا	ربما	نعم	نعم	نعم	نعم	نعم	نعم	لا	لا
أنثى	18-25 سنة	أعزب\عزباء	أقل من 6000 جنيه مصري	ريف	جامعة بكالوريوس /دبلوم	ابتدائي	ابتدائي	طالب	نعم	لا	ليس لدي شريك	لا	نعم	الإنترنت	نعم	لا	لا	لا	نعم	لا	لا	لا	لا	لا	لا	لا	نعم	لا	لا	لا	لا	ربما	نعم	نعم	نعم	نعم	ربما	ربما	لا	لا
أنثى	18-25 سنة	أعزب\عزباء	أقل من 6000 جنيه مصري	مدينة	جامعة بكالوريوس /دبلوم	جامعة بكالوريوس /دبلوم	ثانوي	طالب	لا	نعم	ليس لدي شريك	نعم	نعم	أخرى	لا	نعم	لا	ربما	نعم	لا	لا	لا	لا	لا	لا	ربما	نعم	لا	لا	لا	لا	نعم	نعم	نعم	نعم	نعم	نعم	نعم	لا	لا
ذكر	18-25 سنة	أعزب\عزباء	6000-12000 جنيه مصري	مدينة	جامعة بكالوريوس /دبلوم	شهادات عليا	جامعة بكالوريوس /دبلوم	طالب	نعم	لا	ليس لدي شريك	لا	نعم	الإنترنت, الأهل, الأصدقاء	ربما	ربما	لا	ربما	نعم	لا	لا	لا	لا	لا	ربما	ربما	ربما	لا	ربما	لا	لا	ربما	نعم	نعم	نعم	نعم	ربما	ربما	ربما	لا
ذكر	18-25 سنة	أعزب\عزباء	أكثر من 12000 جنيه مصري	مدينة	جامعة بكالوريوس /دبلوم	ثانوي	شهادات عليا	طالب	نعم	لا	ليس لدي شريك	لا	نعم	الصحف - الكتب - المجلات, الطبيب	نعم	نعم	نعم	لا	نعم	نعم	لا	نعم	لا	نعم	نعم	نعم	لا	نعم	نعم	لا	لا	نعم	لا	لا	لا	لا	لا	لا	لا	لا
أنثى	26-35 سنة	متزوج/ة	أقل من 6000 جنيه مصري	ريف	جامعة بكالوريوس /دبلوم	ابتدائي	ابتدائي	عامل	نعم	نعم	لا	لا	نعم	الأهل	نعم	نعم	لا	ربما	نعم	لا	لا	لا	لا	لا	ربما	لا	نعم	لا	ربما	لا	لا	نعم	ربما	نعم	نعم	نعم	ربما	ربما	لا	لا
ذكر	18-25 سنة	أعزب\عزباء	6000-12000 جنيه مصري	ريف	جامعة بكالوريوس /دبلوم	ابتدائي	ابتدائي	طالب	لا	لا	ليس لدي شريك	لا	نعم	الأهل	نعم	ربما	ربما	ربما	نعم	ربما	ربما	ربما	ربما	لا	ربما	ربما	ربما	ربما	ربما	ربما	ربما	ربما	نعم	نعم	نعم	نعم	ربما	ربما	ربما	لا
أنثى	18-25 سنة	متزوج/ة	أقل من 6000 جنيه مصري	ريف	جامعة بكالوريوس /دبلوم	جامعة بكالوريوس /دبلوم	جامعة بكالوريوس /دبلوم	طالب	نعم	لا	لا	لا	نعم	الإنترنت	ربما	ربما	ربما	لا	نعم	لا	لا	لا	لا	لا	لا	لا	نعم	لا	ربما	لا	ربما	ربما	نعم	نعم	نعم	نعم	ربما	لا	ربما	لا
أنثى	18-25 سنة	أعزب\عزباء	أقل من 6000 جنيه مصري	مدينة	جامعة بكالوريوس /دبلوم	جامعة بكالوريوس /دبلوم	جامعة بكالوريوس /دبلوم	طالب	نعم	لا	لا	لا	نعم	الإنترنت, التلفاز, الصحف - الكتب - المجلات	نعم	نعم	نعم	نعم	نعم	لا	لا	لا	لا	لا	لا	لا	ربما	لا	ربما	لا	لا	لا	نعم	نعم	نعم	نعم	نعم	نعم	لا	لا
أنثى	18-25 سنة	أعزب\عزباء	أقل من 6000 جنيه مصري	مدينة	جامعة بكالوريوس /دبلوم	جامعة بكالوريوس /دبلوم	جامعة بكالوريوس /دبلوم	مربية منزل	نعم	لا	ليس لدي شريك	لا	نعم	الإنترنت	لا	نعم	لا	لا	نعم	لا	ربما	لا	لا	لا	ربما	لا	نعم	لا	لا	لا	لا	لا	نعم	نعم	نعم	نعم	نعم	نعم	لا	لا
ذكر	18-25 سنة	أعزب\عزباء	أقل من 6000 جنيه مصري	مدينة	جامعة بكالوريوس /دبلوم	جامعة بكالوريوس /دبلوم	جامعة بكالوريوس /دبلوم	طالب	نعم	لا	ليس لدي شريك	لا	نعم	الإنترنت, التلفاز, المدرسة, الأهل, الأصدقاء, الصحف - الكتب - المجلات, الطبيب	نعم	لا	لا	لا	نعم	لا	لا	لا	لا	لا	لا	لا	لا	لا	لا	لا	لا	لا	نعم	نعم	نعم	نعم	نعم	نعم	نعم	نعم
أنثى	18-25 سنة	أعزب\عزباء	أقل من 6000 جنيه مصري	ريف	جامعة بكالوريوس /دبلوم	ابتدائي	ابتدائي	طالب	نعم	لا	ليس لدي شريك	لا	نعم	الإنترنت, التلفاز	نعم	نعم	ربما	لا	نعم	لا	لا	لا	لا	لا	لا	لا	نعم	لا	لا	لا	لا	نعم	نعم	نعم	نعم	نعم	نعم	نعم	لا	لا
ذكر	18-25 سنة	أعزب\عزباء	أكثر من 12000 جنيه مصري	مدينة	جامعة بكالوريوس /دبلوم	شهادات عليا	شهادات عليا	طالب	نعم	لا	ليس لدي شريك	لا	نعم	الإنترنت, التلفاز, المدرسة, الصحف - الكتب - المجلات, الطبيب	نعم	نعم	نعم	ربما	نعم	لا	ربما	لا	لا	ربما	ربما	ربما	لا	ربما	ربما	لا	لا	نعم	نعم	نعم	نعم	نعم	نعم	نعم	لا	لا
أنثى	18-25 سنة	أعزب\عزباء	6000-12000 جنيه مصري	مدينة	جامعة بكالوريوس /دبلوم	جامعة بكالوريوس /دبلوم	جامعة بكالوريوس /دبلوم	طالب	نعم	لا	ليس لدي شريك	لا	نعم	الإنترنت, المدرسة, الأهل, الأصدقاء	نعم	نعم	نعم	ربما	نعم	لا	لا	لا	لا	لا	لا	لا	ربما	لا	ربما	لا	لا	ربما	نعم	نعم	نعم	نعم	لا	لا	نعم	لا
أنثى	18-25 سنة	أعزب\عزباء	أقل من 6000 جنيه مصري	مدينة	جامعة بكالوريوس /دبلوم	ابتدائي	جامعة بكالوريوس /دبلوم	طالب	نعم	لا	لا	لا	نعم	الإنترنت, التلفاز, الصحف - الكتب - المجلات	نعم	نعم	نعم	نعم	نعم	لا	لا	لا	لا	نعم	لا	لا	نعم	لا	نعم	لا	لا	نعم	نعم	نعم	نعم	لا	نعم	نعم	لا	لا
أنثى	18-25 سنة	أعزب\عزباء	6000-12000 جنيه مصري	ريف	ثانوي	جامعة بكالوريوس /دبلوم	جامعة بكالوريوس /دبلوم	طالب	نعم	لا	ليس لدي شريك	لا	نعم	الإنترنت, الأهل, الأصدقاء, الصحف - الكتب - المجلات	ربما	ربما	لا	نعم	نعم	لا	لا	لا	لا	ربما	ربما	لا	لا	ربما	ربما	لا	لا	ربما	نعم	نعم	نعم	نعم	نعم	نعم	لا	لا
أنثى	18-25 سنة	أعزب\عزباء	أقل من 6000 جنيه مصري	مدينة	جامعة بكالوريوس /دبلوم	جامعة بكالوريوس /دبلوم	جامعة بكالوريوس /دبلوم	طالب	نعم	لا	ليس لدي شريك	لا	نعم	الإنترنت, الأهل, الطبيب	نعم	نعم	نعم	نعم	نعم	لا	لا	لا	لا	لا	ربما	لا	نعم	لا	لا	لا	لا	لا	نعم	نعم	نعم	نعم	نعم	نعم	لا	لا
أنثى	18-25 سنة	أعزب\عزباء	أقل من 6000 جنيه مصري	مدينة	جامعة بكالوريوس /دبلوم	ثانوي	ثانوي	طالب	نعم	لا	ليس لدي شريك	لا	نعم	الإنترنت, التلفاز	نعم	نعم	ربما	لا	نعم	لا	لا	لا	لا	لا	ربما	لا	ربما	لا	ربما	لا	لا	ربما	نعم	نعم	نعم	نعم	نعم	ربما	لا	لا
أنثى	18-25 سنة	أعزب\عزباء	6000-12000 جنيه مصري	مدينة	جامعة بكالوريوس /دبلوم	جامعة بكالوريوس /دبلوم	جامعة بكالوريوس /دبلوم	طالب	نعم	لا	ليس لدي شريك	لا	نعم	الإنترنت, التلفاز	نعم	ربما	لا	لا	نعم	لا	لا	لا	لا	لا	ربما	لا	ربما	لا	لا	لا	لا	ربما	نعم	نعم	نعم	نعم	نعم	نعم	لا	لا
أنثى	18-25 سنة	أعزب\عزباء	أكثر من 12000 جنيه مصري	مدينة	جامعة بكالوريوس /دبلوم	جامعة بكالوريوس /دبلوم	جامعة بكالوريوس /دبلوم	طالب	نعم	لا	ليس لدي شريك	لا	نعم	الإنترنت	نعم	ربما	ربما	ربما	نعم	لا	لا	لا	لا	لا	ربما	ربما	ربما	ربما	ربما	لا	لا	ربما	نعم	نعم	نعم	نعم	نعم	لا	لا	لا
أنثى	18-25 سنة	أعزب\عزباء	أقل من 6000 جنيه مصري	مدينة	جامعة بكالوريوس /دبلوم	جامعة بكالوريوس /دبلوم	جامعة بكالوريوس /دبلوم	طالب	نعم	لا	لا	لا	نعم	الإنترنت	نعم	نعم	نعم	ربما	نعم	ربما	لا	ربما	ربما	ربما	ربما	ربما	ربما	ربما	ربما	لا	لا	ربما	نعم	لا	نعم	لا	نعم	نعم	ربما	لا
ذكر	18-25 سنة	أعزب\عزباء	6000-12000 جنيه مصري	مدينة	جامعة بكالوريوس /دبلوم	جامعة بكالوريوس /دبلوم	جامعة بكالوريوس /دبلوم	طالب	نعم	لا	لا	لا	نعم	الإنترنت	نعم	نعم	لا	نعم	نعم	لا	لا	لا	لا	لا	نعم	نعم	لا	نعم	لا	لا	لا	نعم	نعم	نعم	نعم	نعم	نعم	نعم	لا	لا
أنثى	18-25 سنة	أعزب\عزباء	أقل من 6000 جنيه مصري	مدينة	جامعة بكالوريوس /دبلوم	جامعة بكالوريوس /دبلوم	جامعة بكالوريوس /دبلوم	طالب	نعم	لا	ليس لدي شريك	لا	نعم	الإنترنت, الأصدقاء	نعم	ربما	ربما	ربما	نعم	لا	لا	ربما	لا	ربما	ربما	لا	ربما	لا	ربما	ربما	ربما	نعم	نعم	نعم	نعم	نعم	ربما	لا	لا	لا
أنثى	18-25 سنة	أعزب\عزباء	أقل من 6000 جنيه مصري	ريف	جامعة بكالوريوس /دبلوم	جامعة بكالوريوس /دبلوم	ابتدائي	طالب	نعم	لا	ليس لدي شريك	لا	نعم	الإنترنت	نعم	لا	ربما	لا	ربما	لا	لا	لا	لا	لا	لا	لا	لا	لا	لا	لا	لا	لا	نعم	نعم	نعم	نعم	نعم	ربما	لا	لا
أنثى	18-25 سنة	أعزب\عزباء	أقل من 6000 جنيه مصري	مدينة	جامعة بكالوريوس /دبلوم	جامعة بكالوريوس /دبلوم	جامعة بكالوريوس /دبلوم	عامل	نعم	لا	ليس لدي شريك	لا	نعم	الإنترنت	نعم	نعم	نعم	نعم	نعم	لا	لا	لا	لا	لا	ربما	ربما	ربما	ربما	ربما	لا	لا	ربما	نعم	نعم	نعم	نعم	نعم	ربما	ربما	لا
أنثى	18-25 سنة	أعزب\عزباء	أقل من 6000 جنيه مصري	مدينة	جامعة بكالوريوس /دبلوم	ابتدائي	جامعة بكالوريوس /دبلوم	طالب	نعم	لا	ليس لدي شريك	لا	نعم	الإنترنت, التلفاز, المدرسة, الأهل, الأصدقاء, الصحف - الكتب - المجلات	نعم	ربما	ربما	نعم	نعم	لا	لا	لا	لا	لا	ربما	لا	ربما	لا	لا	لا	لا	لا	نعم	نعم	نعم	نعم	نعم	نعم	لا	لا
أنثى	18-25 سنة	أعزب\عزباء	6000-12000 جنيه مصري	ريف	جامعة بكالوريوس /دبلوم	جامعة بكالوريوس /دبلوم	جامعة بكالوريوس /دبلوم	طالب	نعم	لا	ليس لدي شريك	لا	نعم	الإنترنت, التلفاز, المدرسة, الأهل, الأصدقاء, الصحف - الكتب - المجلات, الطبيب, أخرى	نعم	نعم	نعم	نعم	نعم	نعم	ربما	ربما	ربما	ربما	ربما	ربما	ربما	ربما	ربما	ربما	ربما	ربما	نعم	ربما	ربما	ربما	لا	لا	نعم	نعم
أنثى	18-25 سنة	أعزب\عزباء	أقل من 6000 جنيه مصري	مدينة	جامعة بكالوريوس /دبلوم	ثانوي	ثانوي	طالب	نعم	لا	ليس لدي شريك	لا	نعم	الإنترنت, التلفاز, المدرسة, الأهل, الأصدقاء, الطبيب	نعم	نعم	نعم	نعم	لا	لا	لا	لا	لا	لا	ربما	لا	لا	لا	ربما	لا	لا	لا	نعم	نعم	نعم	نعم	نعم	نعم	لا	لا
أنثى	18-25 سنة	أعزب\عزباء	أقل من 6000 جنيه مصري	مدينة	جامعة بكالوريوس /دبلوم	ثانوي	ثانوي	طالب	نعم	لا	ليس لدي شريك	لا	نعم	الإنترنت	نعم	ربما	لا	ربما	ربما	لا	لا	لا	لا	لا	ربما	لا	ربما	لا	ربما	ربما	لا	ربما	نعم	نعم	نعم	نعم	نعم	نعم	لا	لا
أنثى	18-25 سنة	أعزب\عزباء	أقل من 6000 جنيه مصري	مدينة	جامعة بكالوريوس /دبلوم	جامعة بكالوريوس /دبلوم	جامعة بكالوريوس /دبلوم	طالب	نعم	لا	ليس لدي شريك	لا	نعم	الإنترنت, التلفاز, الأصدقاء, الطبيب	نعم	نعم	نعم	نعم	نعم	لا	لا	لا	لا	لا	لا	لا	نعم	لا	لا	لا	لا	ربما	نعم	نعم	نعم	نعم	ربما	ربما	ربما	لا
أنثى	18-25 سنة	أعزب\عزباء	6000-12000 جنيه مصري	ريف	جامعة بكالوريوس /دبلوم	جامعة بكالوريوس /دبلوم	جامعة بكالوريوس /دبلوم	طالب	نعم	لا	لا	لا	نعم	الإنترنت, التلفاز, المدرسة, الأهل, الأصدقاء, الصحف - الكتب - المجلات, الطبيب, أخرى	نعم	نعم	نعم	نعم	لا	لا	لا	لا	لا	لا	نعم	نعم	نعم	نعم	لا	نعم	نعم	نعم	لا	ربما	ربما	لا	ربما	نعم	نعم	نعم
أنثى	18-25 سنة	أعزب\عزباء	6000-12000 جنيه مصري	مدينة	جامعة بكالوريوس /دبلوم	جامعة بكالوريوس /دبلوم	جامعة بكالوريوس /دبلوم	طالب	نعم	لا	لا	لا	نعم	الإنترنت	نعم	نعم	لا	لا	ربما	لا	لا	لا	لا	لا	نعم	لا	نعم	ربما	لا	لا	لا	نعم	نعم	نعم	نعم	نعم	نعم	نعم	لا	لا
أنثى	18-25 سنة	أعزب\عزباء	6000-12000 جنيه مصري	مدينة	جامعة بكالوريوس /دبلوم	جامعة بكالوريوس /دبلوم	جامعة بكالوريوس /دبلوم	طالب	نعم	لا	ليس لدي شريك	لا	نعم	الإنترنت, التلفاز, المدرسة	نعم	نعم	ربما	نعم	نعم	لا	لا	لا	لا	لا	ربما	لا	ربما	لا	ربما	لا	ربما	لا	نعم	نعم	نعم	نعم	لا	لا	ربما	لا
أنثى	18-25 سنة	أعزب\عزباء	6000-12000 جنيه مصري	مدينة	جامعة بكالوريوس /دبلوم	جامعة بكالوريوس /دبلوم	جامعة بكالوريوس /دبلوم	طالب	نعم	لا	لا	لا	نعم	أخرى	ربما	لا	ربما	نعم	نعم	لا	لا	لا	لا	لا	لا	لا	لا	لا	لا	لا	لا	ربما	نعم	نعم	نعم	نعم	نعم	نعم	لا	لا
أنثى	18-25 سنة	أعزب\عزباء	أقل من 6000 جنيه مصري	ريف	جامعة بكالوريوس /دبلوم	جامعة بكالوريوس /دبلوم	جامعة بكالوريوس /دبلوم	طالب	نعم	لا	لا	لا	نعم	الإنترنت, التلفاز	نعم	نعم	لا	ربما	نعم	لا	لا	لا	لا	لا	نعم	لا	ربما	لا	لا	لا	لا	ربما	نعم	نعم	نعم	نعم	نعم	نعم	لا	لا
أنثى	18-25 سنة	أعزب\عزباء	6000-12000 جنيه مصري	مدينة	جامعة بكالوريوس /دبلوم	جامعة بكالوريوس /دبلوم	ثانوي	طالب	نعم	لا	ليس لدي شريك	لا	نعم	الإنترنت, المدرسة	نعم	ربما	ربما	نعم	نعم	لا	لا	لا	لا	لا	لا	لا	ربما	لا	لا	لا	لا	نعم	نعم	نعم	نعم	نعم	لا	لا	ربما	لا
أنثى	18-25 سنة	أعزب\عزباء	أكثر من 12000 جنيه مصري	مدينة	جامعة بكالوريوس /دبلوم	ابتدائي	جامعة بكالوريوس /دبلوم	طالب	نعم	لا	ليس لدي شريك	لا	نعم	الإنترنت	نعم	لا	لا	نعم	نعم	لا	لا	لا	لا	لا	لا	لا	نعم	لا	لا	لا	لا	ربما	نعم	نعم	نعم	نعم	ربما	ربما	لا	لا
أنثى	18-25 سنة	أعزب\عزباء	أقل من 6000 جنيه مصري	ريف	جامعة بكالوريوس /دبلوم	جامعة بكالوريوس /دبلوم	جامعة بكالوريوس /دبلوم	طالب	نعم	لا	ليس لدي شريك	لا	نعم	الإنترنت, التلفاز	نعم	نعم	لا	نعم	نعم	لا	لا	لا	لا	لا	لا	لا	ربما	لا	لا	لا	لا	لا	نعم	نعم	نعم	نعم	نعم	نعم	لا	لا
أنثى	18-25 سنة	أعزب\عزباء	6000-12000 جنيه مصري	مدينة	جامعة بكالوريوس /دبلوم	ثانوي	ثانوي	طالب	نعم	لا	ليس لدي شريك	لا	نعم	الإنترنت, التلفاز, الصحف - الكتب - المجلات	نعم	لا	ربما	لا	نعم	لا	لا	لا	لا	لا	لا	لا	لا	لا	لا	لا	لا	ربما	نعم	نعم	نعم	نعم	نعم	نعم	لا	لا
أنثى	18-25 سنة	أعزب\عزباء	أقل من 6000 جنيه مصري	مدينة	جامعة بكالوريوس /دبلوم	جامعة بكالوريوس /دبلوم	جامعة بكالوريوس /دبلوم	مربية منزل	لا	لا	ليس لدي شريك	لا	لا	أخرى	نعم	لا	نعم	لا	نعم	لا	لا	ربما	ربما	لا	لا	لا	نعم	لا	لا	لا	لا	لا	نعم	نعم	نعم	نعم	نعم	نعم	ربما	لا
أنثى	18-25 سنة	أعزب\عزباء	أكثر من 12000 جنيه مصري	مدينة	جامعة بكالوريوس /دبلوم	جامعة بكالوريوس /دبلوم	جامعة بكالوريوس /دبلوم	طالب	نعم	لا	ليس لدي شريك	لا	نعم	الإنترنت, التلفاز	نعم	لا	لا	نعم	نعم	لا	لا	لا	لا	لا	لا	لا	ربما	لا	لا	لا	لا	لا	نعم	نعم	نعم	نعم	نعم	نعم	لا	لا
أنثى	18-25 سنة	أعزب\عزباء	6000-12000 جنيه مصري	مدينة	جامعة بكالوريوس /دبلوم	جامعة بكالوريوس /دبلوم	جامعة بكالوريوس /دبلوم	طالب	نعم	لا	ليس لدي شريك	لا	نعم	الإنترنت, التلفاز, الصحف - الكتب - المجلات	نعم	نعم	لا	لا	نعم	لا	لا	لا	لا	لا	لا	لا	نعم	لا	لا	لا	لا	ربما	نعم	نعم	نعم	نعم	نعم	نعم	لا	نعم
أنثى	18-25 سنة	أعزب\عزباء	أقل من 6000 جنيه مصري	مدينة	جامعة بكالوريوس /دبلوم	جامعة بكالوريوس /دبلوم	جامعة بكالوريوس /دبلوم	طالب	نعم	لا	ليس لدي شريك	لا	نعم	الإنترنت, التلفاز	نعم	ربما	ربما	نعم	نعم	لا	لا	لا	لا	لا	ربما	ربما	ربما	لا	لا	لا	لا	لا	نعم	نعم	نعم	نعم	نعم	نعم	لا	لا
أنثى	18-25 سنة	أعزب\عزباء	6000-12000 جنيه مصري	مدينة	جامعة بكالوريوس /دبلوم	جامعة بكالوريوس /دبلوم	جامعة بكالوريوس /دبلوم	طالب	نعم	لا	ليس لدي شريك	لا	نعم	الإنترنت, التلفاز, المدرسة, الأهل, الأصدقاء, الصحف - الكتب - المجلات, الطبيب, أخرى	نعم	نعم	ربما	ربما	نعم	لا	لا	لا	لا	لا	لا	ربما	نعم	ربما	ربما	ربما	لا	لا	نعم	نعم	نعم	نعم	نعم	نعم	لا	لا
أنثى	18-25 سنة	أعزب\عزباء	أقل من 6000 جنيه مصري	مدينة	جامعة بكالوريوس /دبلوم	ابتدائي	جامعة بكالوريوس /دبلوم	طالب	نعم	لا	ليس لدي شريك	لا	نعم	الإنترنت, التلفاز, المدرسة	ربما	نعم	لا	ربما	نعم	لا	لا	لا	لا	لا	نعم	لا	لا	لا	لا	لا	لا	نعم	نعم	نعم	نعم	نعم	ربما	ربما	لا	لا
أنثى	18-25 سنة	أعزب\عزباء	أقل من 6000 جنيه مصري	مدينة	جامعة بكالوريوس /دبلوم	ثانوي	ثانوي	طالب	نعم	لا	ليس لدي شريك	لا	نعم	الإنترنت, التلفاز, المدرسة, الأصدقاء	ربما	نعم	ربما	ربما	نعم	لا	لا	لا	لا	لا	ربما	لا	لا	لا	لا	لا	لا	نعم	نعم	نعم	نعم	نعم	نعم	ربما	نعم	لا
أنثى	18-25 سنة	أعزب\عزباء	6000-12000 جنيه مصري	مدينة	شهادات عليا	شهادات عليا	جامعة بكالوريوس /دبلوم	طالب	نعم	لا	ليس لدي شريك	لا	نعم	الإنترنت, الصحف - الكتب - المجلات, الطبيب	نعم	لا	نعم	نعم	نعم	لا	لا	لا	لا	لا	لا	لا	نعم	لا	نعم	لا	لا	لا	ربما	نعم	نعم	نعم	لا	لا	ربما	لا
أنثى	18-25 سنة	متزوج/ة	أقل من 6000 جنيه مصري	مدينة	جامعة بكالوريوس /دبلوم	جامعة بكالوريوس /دبلوم	جامعة بكالوريوس /دبلوم	طالب	نعم	لا	لا	لا	نعم	الإنترنت, التلفاز, الأصدقاء, الصحف - الكتب - المجلات	نعم	ربما	ربما	ربما	لا	لا	لا	لا	لا	لا	لا	لا	ربما	لا	لا	لا	لا	ربما	نعم	نعم	نعم	نعم	نعم	نعم	لا	لا
أنثى	18-25 سنة	أعزب\عزباء	6000-12000 جنيه مصري	مدينة	جامعة بكالوريوس /دبلوم	ابتدائي	جامعة بكالوريوس /دبلوم	طالب	لا	لا	ليس لدي شريك	لا	نعم	المدرسة	ربما	نعم	نعم	لا	نعم	لا	لا	لا	لا	لا	نعم	لا	نعم	لا	نعم	لا	ربما	ربما	نعم	نعم	نعم	نعم	ربما	ربما	ربما	لا
أنثى	18-25 سنة	أعزب\عزباء	أقل من 6000 جنيه مصري	مدينة	جامعة بكالوريوس /دبلوم	ثانوي	ابتدائي	طالب	نعم	لا	ليس لدي شريك	لا	نعم	الأهل	نعم	نعم	ربما	لا	نعم	نعم	لا	لا	لا	لا	نعم	لا	ربما	لا	ربما	لا	لا	نعم	نعم	نعم	نعم	نعم	ربما	ربما	ربما	لا
ذكر	18-25 سنة	أعزب\عزباء	6000-12000 جنيه مصري	مدينة	جامعة بكالوريوس /دبلوم	جامعة بكالوريوس /دبلوم	جامعة بكالوريوس /دبلوم	طالب	نعم	لا	ليس لدي شريك	لا	نعم	الأصدقاء	نعم	نعم	لا	ربما	نعم	لا	لا	لا	لا	لا	لا	لا	لا	لا	لا	لا	لا	ربما	نعم	نعم	نعم	نعم	نعم	نعم	نعم	لا
أنثى	18-25 سنة	أعزب\عزباء	6000-12000 جنيه مصري	ريف	جامعة بكالوريوس /دبلوم	جامعة بكالوريوس /دبلوم	جامعة بكالوريوس /دبلوم	طالب	لا	لا	ليس لدي شريك	لا	نعم	الإنترنت, التلفاز, المدرسة	نعم	نعم	لا	لا	نعم	لا	لا	لا	لا	لا	لا	لا	لا	لا	لا	لا	لا	لا	نعم	نعم	نعم	نعم	نعم	نعم	لا	لا
أنثى	18-25 سنة	أعزب\عزباء	أقل من 6000 جنيه مصري	مدينة	جامعة بكالوريوس /دبلوم	ابتدائي	جامعة بكالوريوس /دبلوم	عامل	نعم	لا	لا	لا	نعم	أخرى	نعم	نعم	لا	لا	نعم	لا	لا	لا	لا	لا	لا	لا	لا	لا	لا	لا	لا	ربما	نعم	نعم	نعم	نعم	نعم	نعم	لا	لا
أنثى	18-25 سنة	أعزب\عزباء	6000-12000 جنيه مصري	مدينة	جامعة بكالوريوس /دبلوم	جامعة بكالوريوس /دبلوم	جامعة بكالوريوس /دبلوم	طالب	نعم	لا	لا	لا	نعم	الإنترنت, الأصدقاء, الطبيب	نعم	نعم	ربما	ربما	نعم	لا	لا	لا	لا	لا	ربما	لا	ربما	لا	لا	لا	لا	نعم	نعم	نعم	نعم	نعم	نعم	نعم	لا	لا
أنثى	18-25 سنة	أعزب\عزباء	6000-12000 جنيه مصري	ريف	جامعة بكالوريوس /دبلوم	جامعة بكالوريوس /دبلوم	جامعة بكالوريوس /دبلوم	عامل	لا	لا	لا	لا	نعم	الإنترنت, التلفاز, الصحف - الكتب - المجلات	نعم	ربما	لا	ربما	نعم	لا	لا	لا	لا	لا	ربما	لا	ربما	لا	ربما	لا	لا	ربما	نعم	نعم	نعم	نعم	نعم	نعم	لا	لا
أنثى	18-25 سنة	أعزب\عزباء	أقل من 6000 جنيه مصري	مدينة	جامعة بكالوريوس /دبلوم	ابتدائي	ابتدائي	عامل	لا	لا	لا	لا	نعم	الصحف - الكتب - المجلات	نعم	ربما	ربما	ربما	ربما	لا	لا	ربما	ربما	ربما	ربما	ربما	ربما	ربما	ربما	ربما	ربما	ربما	لا	ربما	ربما	ربما	ربما	ربما	ربما	ربما
أنثى	18-25 سنة	أعزب\عزباء	أقل من 6000 جنيه مصري	مدينة	جامعة بكالوريوس /دبلوم	ابتدائي	ابتدائي	طالب	نعم	لا	ليس لدي شريك	لا	نعم	أخرى	نعم	نعم	نعم	ربما	نعم	لا	لا	لا	لا	لا	لا	لا	لا	لا	لا	لا	لا	لا	نعم	نعم	نعم	نعم	ربما	ربما	ربما	لا
أنثى	18-25 سنة	أعزب\عزباء	أقل من 6000 جنيه مصري	مدينة	جامعة بكالوريوس /دبلوم	جامعة بكالوريوس /دبلوم	ابتدائي	طالب	نعم	لا	ليس لدي شريك	لا	نعم	الإنترنت	نعم	نعم	لا	لا	نعم	لا	لا	لا	لا	لا	لا	لا	ربما	لا	نعم	لا	لا	ربما	نعم	نعم	نعم	نعم	نعم	نعم	ربما	لا
أنثى	18-25 سنة	أعزب\عزباء	أقل من 6000 جنيه مصري	مدينة	جامعة بكالوريوس /دبلوم	ثانوي	ثانوي	طالب	نعم	لا	ليس لدي شريك	لا	نعم	الإنترنت	نعم	ربما	لا	لا	نعم	لا	لا	لا	لا	لا	لا	لا	لا	لا	لا	لا	لا	لا	نعم	نعم	نعم	نعم	نعم	نعم	لا	لا
أنثى	18-25 سنة	أعزب\عزباء	أقل من 6000 جنيه مصري	ريف	جامعة بكالوريوس /دبلوم	ابتدائي	ابتدائي	مربية منزل	نعم	لا	لا	لا	نعم	الإنترنت, الأصدقاء	ربما	نعم	نعم	ربما	نعم	لا	لا	لا	لا	لا	ربما	ربما	ربما	لا	ربما	لا	لا	ربما	نعم	ربما	ربما	ربما	لا	لا	ربما	ربما
أنثى	18-25 سنة	أعزب\عزباء	أكثر من 12000 جنيه مصري	مدينة	جامعة بكالوريوس /دبلوم	جامعة بكالوريوس /دبلوم	جامعة بكالوريوس /دبلوم	طالب	نعم	لا	ليس لدي شريك	لا	نعم	الإنترنت	نعم	ربما	لا	ربما	نعم	لا	لا	ربما	لا	لا	ربما	ربما	ربما	ربما	لا	لا	لا	لا	نعم	نعم	نعم	نعم	ربما	ربما	لا	لا
أنثى	18-25 سنة	أعزب\عزباء	أكثر من 12000 جنيه مصري	مدينة	جامعة بكالوريوس /دبلوم	جامعة بكالوريوس /دبلوم	جامعة بكالوريوس /دبلوم	طالب	نعم	لا	ليس لدي شريك	لا	نعم	أخرى	نعم	ربما	لا	لا	ربما	لا	لا	لا	لا	لا	لا	لا	نعم	لا	ربما	لا	لا	نعم	نعم	نعم	نعم	نعم	نعم	نعم	لا	لا
أنثى	18-25 سنة	أعزب\عزباء	6000-12000 جنيه مصري	مدينة	جامعة بكالوريوس /دبلوم	جامعة بكالوريوس /دبلوم	جامعة بكالوريوس /دبلوم	طالب	لا	لا	ليس لدي شريك	لا	نعم	الإنترنت, التلفاز, الصحف - الكتب - المجلات	نعم	ربما	ربما	نعم	نعم	لا	لا	لا	لا	لا	ربما	لا	لا	لا	ربما	لا	لا	لا	نعم	نعم	نعم	نعم	نعم	نعم	لا	لا
أنثى	18-25 سنة	أعزب\عزباء	6000-12000 جنيه مصري	ريف	ثانوي	جامعة بكالوريوس /دبلوم	جامعة بكالوريوس /دبلوم	طالب	نعم	لا	ليس لدي شريك	لا	نعم	الإنترنت	نعم	ربما	لا	لا	نعم	لا	لا	لا	لا	لا	لا	لا	نعم	لا	لا	لا	لا	لا	نعم	نعم	نعم	نعم	لا	ربما	لا	لا
ذكر	18-25 سنة	أعزب\عزباء	أقل من 6000 جنيه مصري	ريف	جامعة بكالوريوس /دبلوم	جامعة بكالوريوس /دبلوم	جامعة بكالوريوس /دبلوم	عامل	نعم	لا	لا	لا	نعم	الأصدقاء	نعم	نعم	لا	لا	نعم	لا	لا	لا	لا	لا	نعم	لا	لا	لا	لا	لا	لا	نعم	لا	نعم	نعم	نعم	لا	لا	نعم	لا
ذكر	18-25 سنة	أعزب\عزباء	6000-12000 جنيه مصري	مدينة	جامعة بكالوريوس /دبلوم	جامعة بكالوريوس /دبلوم	جامعة بكالوريوس /دبلوم	طالب	نعم	لا	ليس لدي شريك	لا	نعم	الإنترنت	ربما	ربما	ربما	ربما	نعم	لا	لا	ربما	ربما	لا	ربما	لا	نعم	ربما	ربما	ربما	لا	ربما	نعم	نعم	نعم	نعم	نعم	نعم	لا	لا
أنثى	18-25 سنة	أعزب\عزباء	أكثر من 12000 جنيه مصري	مدينة	ثانوي	شهادات عليا	شهادات عليا	طالب	نعم	لا	ليس لدي شريك	لا	نعم	الإنترنت, التلفاز, الأهل	نعم	نعم	لا	نعم	نعم	لا	لا	لا	لا	لا	لا	لا	نعم	لا	نعم	لا	لا	لا	نعم	نعم	نعم	نعم	ربما	ربما	لا	لا
أنثى	18-25 سنة	أعزب\عزباء	أقل من 6000 جنيه مصري	ريف	جامعة بكالوريوس /دبلوم	جامعة بكالوريوس /دبلوم	جامعة بكالوريوس /دبلوم	طالب	نعم	لا	لا	لا	نعم	الإنترنت, التلفاز, الصحف - الكتب - المجلات, أخرى	نعم	ربما	نعم	ربما	نعم	لا	لا	ربما	ربما	ربما	لا	لا	ربما	لا	ربما	لا	ربما	ربما	نعم	نعم	نعم	نعم	نعم	ربما	ربما	لا
أنثى	18-25 سنة	أعزب\عزباء	6000-12000 جنيه مصري	مدينة	شهادات عليا	جامعة بكالوريوس /دبلوم	شهادات عليا	طالب	نعم	لا	لا	لا	نعم	الإنترنت	نعم	نعم	لا	نعم	ربما	لا	لا	لا	لا	لا	لا	لا	نعم	لا	لا	لا	لا	ربما	نعم	نعم	نعم	نعم	ربما	نعم	لا	لا
أنثى	18-25 سنة	أعزب\عزباء	6000-12000 جنيه مصري	مدينة	شهادات عليا	جامعة بكالوريوس /دبلوم	جامعة بكالوريوس /دبلوم	طالب	نعم	لا	ليس لدي شريك	لا	نعم	الإنترنت, الأهل	نعم	نعم	ربما	لا	نعم	لا	لا	لا	لا	لا	لا	لا	نعم	لا	لا	لا	لا	ربما	نعم	نعم	نعم	نعم	نعم	نعم	لا	لا
أنثى	18-25 سنة	أعزب\عزباء	أقل من 6000 جنيه مصري	ريف	جامعة بكالوريوس /دبلوم	جامعة بكالوريوس /دبلوم	جامعة بكالوريوس /دبلوم	طالب	نعم	لا	ليس لدي شريك	لا	نعم	الإنترنت	ربما	ربما	ربما	ربما	ربما	ربما	ربما	ربما	ربما	ربما	ربما	ربما	ربما	ربما	ربما	ربما	ربما	ربما	ربما	ربما	ربما	ربما	ربما	ربما	ربما	ربما
أنثى	18-25 سنة	أعزب\عزباء	أكثر من 12000 جنيه مصري	مدينة	جامعة بكالوريوس /دبلوم	جامعة بكالوريوس /دبلوم	شهادات عليا	طالب	نعم	لا	ليس لدي شريك	لا	نعم	الإنترنت, التلفاز, المدرسة, الأهل, الصحف - الكتب - المجلات	نعم	ربما	لا	لا	نعم	لا	لا	لا	لا	لا	لا	لا	ربما	ربما	لا	لا	لا	ربما	نعم	نعم	نعم	نعم	نعم	نعم	لا	لا
أنثى	18-25 سنة	أعزب\عزباء	أقل من 6000 جنيه مصري	مدينة	جامعة بكالوريوس /دبلوم	ثانوي	ثانوي	عامل	نعم	لا	لا	لا	نعم	الإنترنت, التلفاز, المدرسة, الأهل, الأصدقاء	ربما	لا	لا	نعم	نعم	لا	لا	لا	لا	لا	لا	لا	لا	لا	نعم	لا	لا	نعم	نعم	نعم	نعم	نعم	نعم	نعم	لا	لا
أنثى	18-25 سنة	أعزب\عزباء	6000-12000 جنيه مصري	ريف	جامعة بكالوريوس /دبلوم	جامعة بكالوريوس /دبلوم	جامعة بكالوريوس /دبلوم	طالب	لا	لا	ليس لدي شريك	لا	نعم	الإنترنت, التلفاز, الأهل, الأصدقاء	نعم	نعم	ربما	نعم	ربما	لا	لا	لا	لا	لا	ربما	ربما	لا	ربما	لا	لا	لا	لا	نعم	نعم	نعم	نعم	نعم	نعم	لا	لا
أنثى	18-25 سنة	أعزب\عزباء	6000-12000 جنيه مصري	مدينة	جامعة بكالوريوس /دبلوم	جامعة بكالوريوس /دبلوم	جامعة بكالوريوس /دبلوم	طالب	نعم	لا	ليس لدي شريك	لا	نعم	الإنترنت	نعم	ربما	لا	ربما	نعم	لا	لا	لا	لا	لا	ربما	لا	ربما	ربما	ربما	لا	لا	ربما	نعم	نعم	نعم	نعم	نعم	نعم	لا	لا
أنثى	18-25 سنة	أعزب\عزباء	أكثر من 12000 جنيه مصري	مدينة	جامعة بكالوريوس /دبلوم	ثانوي	ثانوي	طالب	نعم	لا	لا	لا	نعم	الأصدقاء	نعم	نعم	ربما	ربما	ربما	نعم	ربما	ربما	ربما	ربما	ربما	ربما	ربما	ربما	ربما	لا	لا	نعم	نعم	نعم	نعم	نعم	نعم	نعم	ربما	لا
أنثى	18-25 سنة	أعزب\عزباء	أقل من 6000 جنيه مصري	مدينة	جامعة بكالوريوس /دبلوم	جامعة بكالوريوس /دبلوم	جامعة بكالوريوس /دبلوم	طالب	نعم	نعم	ليس لدي شريك	لا	نعم	الأهل	نعم	ربما	لا	لا	نعم	نعم	لا	لا	لا	ربما	ربما	لا	لا	لا	لا	لا	لا	نعم	نعم	نعم	نعم	نعم	نعم	نعم	لا	لا
أنثى	18-25 سنة	أعزب\عزباء	6000-12000 جنيه مصري	مدينة	جامعة بكالوريوس /دبلوم	جامعة بكالوريوس /دبلوم	جامعة بكالوريوس /دبلوم	عامل	نعم	لا	ليس لدي شريك	لا	نعم	الإنترنت, التلفاز, الأصدقاء, الصحف - الكتب - المجلات	نعم	نعم	نعم	نعم	ربما	لا	لا	لا	لا	لا	لا	لا	نعم	لا	لا	لا	لا	ربما	نعم	نعم	نعم	نعم	ربما	ربما	ربما	ربما
أنثى	18-25 سنة	أعزب\عزباء	أقل من 6000 جنيه مصري	ريف	شهادات عليا	جامعة بكالوريوس /دبلوم	جامعة بكالوريوس /دبلوم	عامل	نعم	لا	ليس لدي شريك	لا	نعم	الإنترنت, التلفاز, المدرسة, الأهل, الأصدقاء, الصحف - الكتب - المجلات, الطبيب, أخرى	نعم	نعم	لا	نعم	نعم	لا	لا	لا	لا	لا	نعم	لا	لا	لا	لا	لا	لا	ربما	نعم	نعم	نعم	نعم	نعم	نعم	ربما	لا
أنثى	18-25 سنة	أعزب\عزباء	أقل من 6000 جنيه مصري	مدينة	جامعة بكالوريوس /دبلوم	ثانوي	ثانوي	طالب	نعم	لا	لا	لا	نعم	الأهل	ربما	نعم	نعم	نعم	نعم	لا	لا	لا	لا	لا	ربما	ربما	نعم	ربما	ربما	ربما	لا	نعم	نعم	نعم	نعم	نعم	نعم	نعم	لا	لا
ذكر	18-25 سنة	أعزب\عزباء	أقل من 6000 جنيه مصري	مدينة	جامعة بكالوريوس /دبلوم	جامعة بكالوريوس /دبلوم	جامعة بكالوريوس /دبلوم	طالب	نعم	لا	ليس لدي شريك	لا	نعم	الأصدقاء	ربما	ربما	لا	ربما	لا	لا	لا	لا	لا	لا	ربما	لا	ربما	لا	ربما	لا	لا	ربما	نعم	نعم	نعم	نعم	لا	لا	لا	لا
ذكر	18-25 سنة	أعزب\عزباء	6000-12000 جنيه مصري	مدينة	جامعة بكالوريوس /دبلوم	جامعة بكالوريوس /دبلوم	جامعة بكالوريوس /دبلوم	متقاعد	نعم	لا	لا	لا	نعم	الأصدقاء, الطبيب	نعم	نعم	نعم	نعم	ربما	لا	لا	لا	لا	لا	لا	لا	نعم	لا	لا	لا	لا	لا	ربما	نعم	نعم	نعم	ربما	لا	لا	لا
أنثى	18-25 سنة	أعزب\عزباء	أقل من 6000 جنيه مصري	مدينة	جامعة بكالوريوس /دبلوم	جامعة بكالوريوس /دبلوم	جامعة بكالوريوس /دبلوم	طالب	لا	لا	لا	لا	نعم	الإنترنت	نعم	لا	لا	نعم	لا	لا	لا	لا	لا	لا	لا	لا	نعم	لا	لا	لا	لا	نعم	نعم	نعم	نعم	نعم	نعم	نعم	لا	لا
ذكر	18-25 سنة	أعزب\عزباء	6000-12000 جنيه مصري	ريف	جامعة بكالوريوس /دبلوم	جامعة بكالوريوس /دبلوم	جامعة بكالوريوس /دبلوم	طالب	نعم	لا	ليس لدي شريك	لا	نعم	الإنترنت, التلفاز, الأهل, الأصدقاء	نعم	لا	لا	لا	نعم	لا	لا	لا	لا	لا	لا	لا	نعم	لا	لا	لا	لا	لا	نعم	نعم	نعم	نعم	ربما	ربما	لا	لا
أنثى	18-25 سنة	أعزب\عزباء	أقل من 6000 جنيه مصري	ريف	جامعة بكالوريوس /دبلوم	جامعة بكالوريوس /دبلوم	شهادات عليا	طالب	نعم	لا	لا	لا	نعم	الإنترنت	نعم	نعم	نعم	لا	نعم	لا	لا	لا	لا	لا	لا	لا	لا	ربما	لا	لا	لا	ربما	نعم	نعم	نعم	نعم	نعم	نعم	ربما	لا
ذكر	18-25 سنة	أعزب\عزباء	أقل من 6000 جنيه مصري	مدينة	جامعة بكالوريوس /دبلوم	جامعة بكالوريوس /دبلوم	ثانوي	طالب	لا	لا	لا	لا	نعم	الأصدقاء	نعم	نعم	لا	ربما	نعم	ربما	لا	ربما	ربما	ربما	لا	لا	ربما	ربما	لا	لا	ربما	ربما	نعم	نعم	نعم	ربما	ربما	نعم	لا	لا
أنثى	36-50 سنة	متزوج/ة	أقل من 6000 جنيه مصري	ريف	جامعة بكالوريوس /دبلوم	جامعة بكالوريوس /دبلوم	جامعة بكالوريوس /دبلوم	عامل	نعم	لا	ليس لدي شريك	لا	نعم	الصحف - الكتب - المجلات	نعم	نعم	ربما	ربما	نعم	لا	لا	لا	لا	لا	ربما	لا	لا	لا	ربما	ربما	لا	ربما	نعم	نعم	نعم	نعم	ربما	ربما	لا	لا
أنثى	18-25 سنة	أعزب\عزباء	أكثر من 12000 جنيه مصري	ريف	جامعة بكالوريوس /دبلوم	ثانوي	ثانوي	طالب	نعم	لا	ليس لدي شريك	لا	نعم	الإنترنت, أخرى	نعم	ربما	ربما	نعم	نعم	لا	لا	لا	لا	لا	ربما	لا	نعم	لا	ربما	لا	لا	ربما	نعم	نعم	نعم	نعم	لا	لا	لا	لا
أنثى	18-25 سنة	أعزب\عزباء	أقل من 6000 جنيه مصري	ريف	جامعة بكالوريوس /دبلوم	جامعة بكالوريوس /دبلوم	جامعة بكالوريوس /دبلوم	عامل	لا	لا	ليس لدي شريك	لا	نعم	المدرسة	نعم	نعم	ربما	لا	نعم	لا	لا	لا	لا	لا	لا	لا	نعم	لا	ربما	لا	لا	ربما	ربما	نعم	نعم	نعم	نعم	نعم	لا	لا
ذكر	18-25 سنة	أعزب\عزباء	6000-12000 جنيه مصري	مدينة	جامعة بكالوريوس /دبلوم	جامعة بكالوريوس /دبلوم	جامعة بكالوريوس /دبلوم	عامل	نعم	لا	لا	لا	نعم	الصحف - الكتب - المجلات	لا	لا	لا	لا	نعم	لا	لا	لا	لا	لا	لا	لا	ربما	لا	لا	لا	لا	ربما	نعم	نعم	نعم	نعم	نعم	نعم	لا	لا
أنثى	18-25 سنة	أعزب\عزباء	6000-12000 جنيه مصري	ريف	جامعة بكالوريوس /دبلوم	شهادات عليا	جامعة بكالوريوس /دبلوم	طالب	نعم	لا	ليس لدي شريك	لا	نعم	الإنترنت, التلفاز, الأهل, الأصدقاء, الصحف - الكتب - المجلات, الطبيب, أخرى	نعم	نعم	ربما	نعم	نعم	لا	لا	لا	لا	لا	ربما	لا	ربما	لا	لا	لا	لا	لا	نعم	نعم	نعم	نعم	نعم	نعم	لا	لا
أنثى	18-25 سنة	أعزب\عزباء	6000-12000 جنيه مصري	مدينة	جامعة بكالوريوس /دبلوم	شهادات عليا	شهادات عليا	طالب	نعم	لا	ليس لدي شريك	لا	نعم	الصحف - الكتب - المجلات	نعم	نعم	ربما	ربما	نعم	لا	لا	لا	لا	لا	ربما	لا	ربما	لا	لا	لا	لا	نعم	نعم	نعم	نعم	نعم	ربما	ربما	لا	لا
أنثى	18-25 سنة	أعزب\عزباء	6000-12000 جنيه مصري	ريف	جامعة بكالوريوس /دبلوم	جامعة بكالوريوس /دبلوم	جامعة بكالوريوس /دبلوم	عامل	نعم	لا	ليس لدي شريك	لا	نعم	الطبيب	نعم	لا	ربما	لا	نعم	لا	لا	لا	لا	ربما	لا	لا	ربما	لا	ربما	لا	لا	ربما	ربما	ربما	ربما	ربما	ربما	ربما	لا	لا
أنثى	26-35 سنة	أعزب\عزباء	6000-12000 جنيه مصري	مدينة	جامعة بكالوريوس /دبلوم	جامعة بكالوريوس /دبلوم	جامعة بكالوريوس /دبلوم	طالب	نعم	لا	ليس لدي شريك	لا	نعم	الإنترنت, التلفاز, المدرسة, الأهل, الأصدقاء, الصحف - الكتب - المجلات, الطبيب, أخرى	نعم	نعم	ربما	نعم	ربما	لا	لا	لا	لا	لا	لا	لا	ربما	لا	ربما	لا	لا	نعم	نعم	نعم	نعم	نعم	نعم	نعم	لا	لا
ذكر	18-25 سنة	أعزب\عزباء	6000-12000 جنيه مصري	مدينة	جامعة بكالوريوس /دبلوم	جامعة بكالوريوس /دبلوم	جامعة بكالوريوس /دبلوم	عامل	نعم	لا	ليس لدي شريك	لا	نعم	الإنترنت, المدرسة, الصحف - الكتب - المجلات	نعم	ربما	ربما	ربما	نعم	لا	لا	لا	لا	لا	ربما	ربما	ربما	لا	ربما	لا	لا	نعم	نعم	نعم	نعم	نعم	نعم	لا	لا	لا
أنثى	18-25 سنة	أعزب\عزباء	أكثر من 12000 جنيه مصري	مدينة	جامعة بكالوريوس /دبلوم	جامعة بكالوريوس /دبلوم	جامعة بكالوريوس /دبلوم	طالب	نعم	لا	ليس لدي شريك	لا	نعم	الإنترنت, المدرسة, الأهل, الأصدقاء, الصحف - الكتب - المجلات, الطبيب	نعم	نعم	ربما	نعم	نعم	لا	لا	لا	لا	لا	ربما	لا	ربما	لا	ربما	لا	لا	نعم	نعم	نعم	نعم	نعم	نعم	نعم	لا	لا
أنثى	18-25 سنة	أعزب\عزباء	أكثر من 12000 جنيه مصري	مدينة	جامعة بكالوريوس /دبلوم	جامعة بكالوريوس /دبلوم	جامعة بكالوريوس /دبلوم	طالب	نعم	لا	ليس لدي شريك	لا	نعم	الإنترنت, التلفاز, المدرسة, الصحف - الكتب - المجلات, الطبيب	نعم	نعم	لا	لا	نعم	لا	لا	لا	لا	لا	لا	لا	لا	لا	لا	لا	لا	ربما	نعم	نعم	نعم	نعم	نعم	نعم	لا	لا
أنثى	18-25 سنة	أعزب\عزباء	أكثر من 12000 جنيه مصري	ريف	جامعة بكالوريوس /دبلوم	جامعة بكالوريوس /دبلوم	جامعة بكالوريوس /دبلوم	طالب	نعم	لا	لا	لا	نعم	الإنترنت, الأهل, الأصدقاء, الصحف - الكتب - المجلات, الطبيب	نعم	لا	لا	ربما	نعم	لا	لا	لا	لا	لا	لا	لا	لا	لا	ربما	لا	لا	ربما	نعم	نعم	نعم	ربما	لا	لا	لا	لا
أنثى	18-25 سنة	أعزب\عزباء	6000-12000 جنيه مصري	ريف	جامعة بكالوريوس /دبلوم	جامعة بكالوريوس /دبلوم	جامعة بكالوريوس /دبلوم	عامل	نعم	لا	ليس لدي شريك	لا	لا	أخرى	ربما	ربما	ربما	ربما	نعم	ربما	ربما	ربما	ربما	ربما	ربما	ربما	ربما	ربما	ربما	ربما	ربما	ربما	ربما	ربما	ربما	ربما	ربما	ربما	ربما	ربما
ذكر	18-25 سنة	أعزب\عزباء	6000-12000 جنيه مصري	مدينة	جامعة بكالوريوس /دبلوم	جامعة بكالوريوس /دبلوم	جامعة بكالوريوس /دبلوم	طالب	نعم	لا	لا	لا	نعم	الأصدقاء	نعم	نعم	نعم	نعم	نعم	لا	لا	لا	لا	لا	لا	لا	لا	لا	لا	لا	لا	لا	نعم	نعم	نعم	نعم	لا	لا	نعم	لا
أنثى	18-25 سنة	أعزب\عزباء	أقل من 6000 جنيه مصري	مدينة	جامعة بكالوريوس /دبلوم	ابتدائي	ابتدائي	عامل	نعم	لا	لا	لا	نعم	أخرى	نعم	نعم	نعم	ربما	نعم	لا	لا	لا	لا	لا	نعم	لا	نعم	لا	لا	لا	لا	نعم	نعم	نعم	نعم	نعم	ربما	ربما	لا	لا
ذكر	18-25 سنة	أعزب\عزباء	6000-12000 جنيه مصري	ريف	شهادات عليا	شهادات عليا	ثانوي	عامل	نعم	نعم	ليس لدي شريك	لا	نعم	أخرى	لا	نعم	ربما	نعم	نعم	لا	لا	لا	لا	لا	ربما	لا	لا	لا	نعم	لا	لا	نعم	نعم	نعم	ربما	نعم	نعم	نعم	لا	لا
أنثى	18-25 سنة	متزوج/ة	6000-12000 جنيه مصري	ريف	جامعة بكالوريوس /دبلوم	جامعة بكالوريوس /دبلوم	جامعة بكالوريوس /دبلوم	طالب	نعم	نعم	لا	لا	نعم	الإنترنت, التلفاز, المدرسة, الأهل, الأصدقاء, الصحف - الكتب - المجلات, الطبيب	نعم	نعم	لا	نعم	نعم	لا	لا	لا	لا	لا	نعم	لا	ربما	لا	لا	لا	لا	لا	نعم	نعم	نعم	نعم	ربما	ربما	لا	لا
أنثى	18-25 سنة	أعزب\عزباء	6000-12000 جنيه مصري	ريف	جامعة بكالوريوس /دبلوم	جامعة بكالوريوس /دبلوم	جامعة بكالوريوس /دبلوم	عامل	نعم	لا	ليس لدي شريك	لا	نعم	الإنترنت, الأهل, الأصدقاء, الطبيب	نعم	نعم	لا	نعم	نعم	لا	لا	لا	لا	لا	ربما	لا	ربما	لا	نعم	لا	لا	لا	نعم	نعم	نعم	نعم	نعم	نعم	لا	لا
أنثى	18-25 سنة	أعزب\عزباء	6000-12000 جنيه مصري	ريف	جامعة بكالوريوس /دبلوم	جامعة بكالوريوس /دبلوم	جامعة بكالوريوس /دبلوم	عامل	نعم	لا	ليس لدي شريك	لا	نعم	الطبيب	نعم	ربما	نعم	ربما	نعم	لا	لا	لا	لا	لا	لا	لا	ربما	لا	ربما	لا	لا	ربما	نعم	نعم	نعم	نعم	ربما	ربما	ربما	لا
أنثى	18-25 سنة	أعزب\عزباء	6000-12000 جنيه مصري	مدينة	جامعة بكالوريوس /دبلوم	جامعة بكالوريوس /دبلوم	جامعة بكالوريوس /دبلوم	عامل	نعم	لا	لا	لا	نعم	الإنترنت, الأصدقاء, الطبيب	نعم	نعم	لا	نعم	نعم	لا	لا	لا	لا	لا	لا	لا	لا	لا	لا	لا	لا	نعم	نعم	نعم	نعم	نعم	ربما	ربما	لا	لا
ذكر	18-25 سنة	أعزب\عزباء	أكثر من 12000 جنيه مصري	ريف	جامعة بكالوريوس /دبلوم	جامعة بكالوريوس /دبلوم	جامعة بكالوريوس /دبلوم	طالب	لا	لا	ليس لدي شريك	لا	نعم	الإنترنت, التلفاز, المدرسة, الأهل, الأصدقاء, أخرى	نعم	نعم	لا	ربما	نعم	لا	لا	لا	لا	لا	ربما	لا	ربما	لا	لا	لا	لا	ربما	نعم	نعم	نعم	نعم	نعم	نعم	لا	لا
ذكر	18-25 سنة	أعزب\عزباء	أقل من 6000 جنيه مصري	ريف	جامعة بكالوريوس /دبلوم	جامعة بكالوريوس /دبلوم	جامعة بكالوريوس /دبلوم	طالب	نعم	لا	ليس لدي شريك	لا	نعم	أخرى	نعم	لا	ربما	لا	نعم	لا	لا	لا	لا	لا	لا	لا	نعم	لا	لا	لا	لا	ربما	نعم	نعم	نعم	نعم	نعم	نعم	لا	لا
أنثى	36-50 سنة	متزوج/ة	6000-12000 جنيه مصري	ريف	جامعة بكالوريوس /دبلوم	جامعة بكالوريوس /دبلوم	جامعة بكالوريوس /دبلوم	عامل	لا	لا	لا	لا	نعم	الأصدقاء	نعم	نعم	نعم	نعم	نعم	لا	ربما	لا	لا	ربما	ربما	ربما	نعم	ربما	ربما	ربما	ربما	ربما	ربما	نعم	نعم	نعم	ربما	ربما	ربما	لا
أنثى	36-50 سنة	متزوج/ة	6000-12000 جنيه مصري	مدينة	ثانوي	ابتدائي	ابتدائي	مربية منزل	لا	لا	لا	لا	نعم	الإنترنت, التلفاز, الصحف - الكتب - المجلات	نعم	نعم	ربما	لا	نعم	لا	لا	لا	لا	لا	لا	لا	نعم	لا	ربما	ربما	لا	ربما	ربما	نعم	نعم	نعم	لا	لا	لا	ربما
أنثى	36-50 سنة	متزوج/ة	أكثر من 12000 جنيه مصري	مدينة	شهادات عليا	شهادات عليا	شهادات عليا	عامل	نعم	نعم	لا	لا	نعم	الطبيب	نعم	نعم	ربما	نعم	نعم	لا	لا	لا	لا	لا	نعم	لا	لا	لا	لا	نعم	لا	نعم	نعم	ربما	نعم	نعم	ربما	نعم	لا	لا
أنثى	36-50 سنة	متزوج/ة	أقل من 6000 جنيه مصري	ريف	جامعة بكالوريوس /دبلوم	جامعة بكالوريوس /دبلوم	جامعة بكالوريوس /دبلوم	مربية منزل	لا	لا	ليس لدي شريك	لا	نعم	الإنترنت, الصحف - الكتب - المجلات, أخرى	نعم	ربما	لا	لا	نعم	لا	لا	لا	لا	لا	ربما	لا	ربما	لا	ربما	لا	لا	ربما	نعم	نعم	نعم	نعم	ربما	ربما	لا	لا
ذكر	18-25 سنة	أعزب\عزباء	أكثر من 12000 جنيه مصري	ريف	شهادات عليا	جامعة بكالوريوس /دبلوم	جامعة بكالوريوس /دبلوم	طالب	نعم	لا	ليس لدي شريك	لا	نعم	الإنترنت	نعم	ربما	لا	لا	لا	لا	لا	لا	لا	لا	ربما	لا	ربما	لا	لا	لا	لا	لا	ربما	ربما	ربما	نعم	نعم	لا	لا	نعم
أنثى	26-35 سنة	متزوج/ة	6000-12000 جنيه مصري	مدينة	جامعة بكالوريوس /دبلوم	جامعة بكالوريوس /دبلوم	جامعة بكالوريوس /دبلوم	عامل	نعم	لا	لا	لا	نعم	الإنترنت, التلفاز, الأهل	نعم	نعم	نعم	لا	نعم	لا	لا	لا	لا	لا	لا	لا	لا	لا	لا	لا	لا	لا	نعم	نعم	نعم	نعم	نعم	نعم	لا	لا
أنثى	26-35 سنة	متزوج/ة	أكثر من 12000 جنيه مصري	مدينة	جامعة بكالوريوس /دبلوم	ثانوي	جامعة بكالوريوس /دبلوم	مربية منزل	لا	لا	لا	لا	نعم	الإنترنت, الأصدقاء	ربما	نعم	ربما	ربما	نعم	لا	لا	لا	لا	لا	لا	لا	نعم	لا	لا	لا	لا	ربما	نعم	نعم	نعم	نعم	ربما	ربما	لا	لا
أنثى	26-35 سنة	متزوج/ة	أكثر من 12000 جنيه مصري	مدينة	جامعة بكالوريوس /دبلوم	جامعة بكالوريوس /دبلوم	جامعة بكالوريوس /دبلوم	مربية منزل	لا	نعم	لا	لا	نعم	الأهل	نعم	نعم	لا	نعم	لا	لا	لا	لا	لا	لا	لا	لا	ربما	لا	لا	لا	لا	ربما	نعم	نعم	نعم	نعم	نعم	نعم	لا	لا
أنثى	36-50 سنة	متزوج/ة	أكثر من 12000 جنيه مصري	مدينة	جامعة بكالوريوس /دبلوم	ابتدائي	جامعة بكالوريوس /دبلوم	مربية منزل	لا	لا	لا	لا	نعم	الإنترنت, التلفاز, الأهل, الصحف - الكتب - المجلات	نعم	نعم	نعم	نعم	نعم	ربما	لا	ربما	لا	لا	ربما	لا	ربما	لا	ربما	لا	لا	ربما	ربما	نعم	نعم	نعم	ربما	نعم	ربما	لا
أنثى	26-35 سنة	متزوج/ة	أكثر من 12000 جنيه مصري	ريف	جامعة بكالوريوس /دبلوم	ثانوي	ثانوي	مربية منزل	لا	لا	لا	لا	نعم	أخرى	نعم	نعم	لا	ربما	نعم	لا	لا	لا	لا	لا	ربما	لا	ربما	لا	لا	لا	لا	ربما	نعم	نعم	نعم	نعم	ربما	ربما	لا	لا
أنثى	26-35 سنة	متزوج/ة	أكثر من 12000 جنيه مصري	مدينة	جامعة بكالوريوس /دبلوم	جامعة بكالوريوس /دبلوم	جامعة بكالوريوس /دبلوم	مربية منزل	لا	لا	لا	لا	نعم	الإنترنت, التلفاز, الأهل, الأصدقاء, الصحف - الكتب - المجلات, الطبيب	نعم	نعم	لا	ربما	نعم	لا	لا	ربما	لا	لا	ربما	ربما	ربما	لا	لا	لا	لا	لا	نعم	نعم	نعم	نعم	نعم	نعم	لا	لا
أنثى	36-50 سنة	متزوج/ة	6000-12000 جنيه مصري	مدينة	جامعة بكالوريوس /دبلوم	جامعة بكالوريوس /دبلوم	جامعة بكالوريوس /دبلوم	عامل	نعم	لا	لا	لا	نعم	الصحف - الكتب - المجلات	نعم	نعم	لا	نعم	نعم	لا	لا	لا	لا	لا	لا	لا	لا	لا	لا	لا	لا	نعم	نعم	نعم	نعم	نعم	نعم	نعم	لا	لا
أنثى	36-50 سنة	متزوج/ة	أكثر من 12000 جنيه مصري	مدينة	شهادات عليا	شهادات عليا	جامعة بكالوريوس /دبلوم	عامل	لا	لا	لا	لا	نعم	الإنترنت, التلفاز	نعم	ربما	لا	ربما	نعم	لا	لا	لا	ربما	لا	ربما	لا	ربما	لا	لا	لا	لا	ربما	نعم	نعم	نعم	نعم	ربما	ربما	ربما	لا
أنثى	51 سنة فأكثر	متزوج/ة	6000-12000 جنيه مصري	مدينة	شهادات عليا	شهادات عليا	شهادات عليا	عامل	نعم	لا	ليس لدي شريك	لا	نعم	الإنترنت, التلفاز, الأهل, الصحف - الكتب - المجلات, الطبيب, أخرى	نعم	نعم	ربما	نعم	نعم	لا	لا	لا	لا	لا	لا	لا	لا	لا	لا	لا	لا	لا	ربما	نعم	نعم	ربما	ربما	ربما	لا	لا
أنثى	36-50 سنة	متزوج/ة	أكثر من 12000 جنيه مصري	مدينة	شهادات عليا	ابتدائي	جامعة بكالوريوس /دبلوم	عامل	نعم	لا	لا	لا	نعم	الإنترنت, التلفاز	نعم	نعم	لا	لا	نعم	لا	لا	لا	لا	لا	لا	لا	نعم	لا	لا	لا	لا	لا	نعم	نعم	نعم	نعم	ربما	ربما	لا	لا
أنثى	36-50 سنة	متزوج/ة	أكثر من 12000 جنيه مصري	مدينة	جامعة بكالوريوس /دبلوم	شهادات عليا	جامعة بكالوريوس /دبلوم	مربية منزل	لا	لا	ليس لدي شريك	لا	نعم	الأهل	نعم	نعم	ربما	ربما	نعم	لا	لا	لا	لا	لا	لا	لا	ربما	لا	لا	لا	لا	ربما	نعم	نعم	نعم	نعم	نعم	لا	لا	لا
أنثى	26-35 سنة	متزوج/ة	6000-12000 جنيه مصري	مدينة	جامعة بكالوريوس /دبلوم	ابتدائي	ابتدائي	مربية منزل	لا	لا	لا	لا	نعم	التلفاز	نعم	نعم	ربما	نعم	نعم	لا	ربما	لا	لا	ربما	ربما	ربما	لا	لا	ربما	لا	لا	نعم	نعم	نعم	نعم	ربما	ربما	نعم	ربما	لا
أنثى	26-35 سنة	متزوج/ة	أقل من 6000 جنيه مصري	مدينة	شهادات عليا	جامعة بكالوريوس /دبلوم	جامعة بكالوريوس /دبلوم	عامل	لا	لا	لا	لا	نعم	الأصدقاء	نعم	نعم	لا	ربما	نعم	لا	لا	لا	لا	لا	ربما	ربما	نعم	لا	ربما	لا	ربما	نعم	نعم	نعم	نعم	نعم	نعم	نعم	ربما	لا
أنثى	36-50 سنة	متزوج/ة	أقل من 6000 جنيه مصري	ريف	جامعة بكالوريوس /دبلوم	جامعة بكالوريوس /دبلوم	جامعة بكالوريوس /دبلوم	عامل	لا	لا	لا	لا	نعم	الأهل	نعم	نعم	نعم	ربما	نعم	لا	لا	لا	لا	ربما	ربما	نعم	لا	ربما	لا	لا	لا	ربما	ربما	نعم	نعم	لا	لا	ربما	نعم	لا
ذكر	18-25 سنة	أعزب\عزباء	أقل من 6000 جنيه مصري	مدينة	جامعة بكالوريوس /دبلوم	شهادات عليا	شهادات عليا	طالب	لا	لا	لا	لا	نعم	أخرى	لا	لا	لا	لا	لا	لا	لا	لا	لا	لا	لا	لا	لا	لا	لا	لا	لا	لا	لا	لا	لا	لا	لا	لا	لا	لا
أنثى	26-35 سنة	متزوج/ة	أكثر من 12000 جنيه مصري	مدينة	جامعة بكالوريوس /دبلوم	ثانوي	ثانوي	مربية منزل	لا	لا	لا	لا	نعم	الإنترنت, التلفاز, المدرسة, الأصدقاء, الصحف - الكتب - المجلات	ربما	نعم	لا	نعم	نعم	لا	لا	لا	لا	لا	نعم	لا	لا	لا	لا	لا	ربما	لا	نعم	نعم	نعم	نعم	ربما	ربما	ربما	لا
أنثى	26-35 سنة	متزوج/ة	6000-12000 جنيه مصري	ريف	شهادات عليا	جامعة بكالوريوس /دبلوم	جامعة بكالوريوس /دبلوم	مربية منزل	لا	لا	لا	لا	نعم	الإنترنت, التلفاز, الأهل, الأصدقاء	نعم	لا	لا	ربما	نعم	لا	لا	لا	لا	لا	لا	لا	لا	لا	ربما	لا	لا	لا	نعم	نعم	نعم	نعم	ربما	ربما	لا	لا
ذكر	18-25 سنة	أعزب\عزباء	6000-12000 جنيه مصري	مدينة	جامعة بكالوريوس /دبلوم	جامعة بكالوريوس /دبلوم	جامعة بكالوريوس /دبلوم	طالب	لا	لا	ليس لدي شريك	لا	نعم	الإنترنت, التلفاز, الطبيب	نعم	ربما	ربما	ربما	نعم	ربما	لا	ربما	ربما	لا	لا	لا	ربما	لا	ربما	لا	لا	ربما	نعم	ربما	نعم	ربما	ربما	ربما	ربما	لا
أنثى	26-35 سنة	متزوج/ة	6000-12000 جنيه مصري	مدينة	شهادات عليا	شهادات عليا	شهادات عليا	مربية منزل	لا	لا	لا	لا	نعم	الإنترنت, التلفاز, المدرسة, الأهل, الأصدقاء, الصحف - الكتب - المجلات, الطبيب	نعم	نعم	ربما	نعم	نعم	لا	لا	لا	لا	لا	لا	لا	لا	لا	لا	لا	لا	ربما	نعم	نعم	نعم	نعم	نعم	نعم	لا	لا
ذكر	18-25 سنة	أعزب\عزباء	أقل من 6000 جنيه مصري	ريف	جامعة بكالوريوس /دبلوم	جامعة بكالوريوس /دبلوم	جامعة بكالوريوس /دبلوم	عامل	لا	لا	ليس لدي شريك	لا	نعم	الصحف - الكتب - المجلات	نعم	ربما	ربما	ربما	نعم	لا	لا	لا	لا	لا	ربما	لا	ربما	ربما	ربما	لا	لا	ربما	نعم	نعم	نعم	نعم	لا	لا	ربما	لا
أنثى	36-50 سنة	متزوج/ة	أقل من 6000 جنيه مصري	ريف	ابتدائي	ابتدائي	ابتدائي	مربية منزل	لا	لا	لا	لا	نعم	التلفاز	نعم	لا	نعم	ربما	نعم	لا	ربما	لا	لا	لا	ربما	لا	لا	لا	لا	لا	لا	لا	ربما	نعم	نعم	لا	لا	ربما	لا	لا
ذكر	26-35 سنة	متزوج/ة	6000-12000 جنيه مصري	ريف	جامعة بكالوريوس /دبلوم	ابتدائي	ابتدائي	عامل	نعم	لا	لا	لا	نعم	أخرى	ربما	نعم	ربما	ربما	نعم	لا	لا	ربما	لا	لا	لا	لا	لا	لا	ربما	لا	لا	نعم	ربما	نعم	نعم	ربما	لا	لا	نعم	لا
ذكر	26-35 سنة	متزوج/ة	6000-12000 جنيه مصري	مدينة	جامعة بكالوريوس /دبلوم	جامعة بكالوريوس /دبلوم	جامعة بكالوريوس /دبلوم	مربية منزل	نعم	لا	لا	لا	نعم	الإنترنت, التلفاز, المدرسة, الصحف - الكتب - المجلات, الطبيب, أخرى	نعم	نعم	نعم	نعم	نعم	لا	لا	لا	لا	لا	لا	لا	لا	لا	لا	لا	لا	نعم	نعم	نعم	نعم	نعم	ربما	نعم	لا	لا
ذكر	18-25 سنة	أعزب\عزباء	أكثر من 12000 جنيه مصري	ريف	جامعة بكالوريوس /دبلوم	شهادات عليا	جامعة بكالوريوس /دبلوم	طالب	لا	نعم	ليس لدي شريك	لا	نعم	الإنترنت, التلفاز, الأهل	نعم	ربما	ربما	نعم	نعم	لا	لا	لا	لا	لا	لا	لا	لا	لا	ربما	لا	لا	ربما	نعم	نعم	نعم	نعم	نعم	نعم	لا	لا
ذكر	26-35 سنة	أعزب\عزباء	6000-12000 جنيه مصري	ريف	جامعة بكالوريوس /دبلوم	جامعة بكالوريوس /دبلوم	جامعة بكالوريوس /دبلوم	عامل	نعم	لا	ليس لدي شريك	لا	نعم	الإنترنت, الأصدقاء	نعم	نعم	ربما	نعم	نعم	لا	لا	لا	لا	لا	نعم	لا	لا	لا	لا	لا	لا	ربما	نعم	نعم	نعم	نعم	ربما	ربما	لا	لا
ذكر	18-25 سنة	أعزب\عزباء	أقل من 6000 جنيه مصري	ريف	جامعة بكالوريوس /دبلوم	جامعة بكالوريوس /دبلوم	جامعة بكالوريوس /دبلوم	مربية منزل	لا	لا	ليس لدي شريك	لا	نعم	الأصدقاء	نعم	نعم	نعم	نعم	لا	لا	لا	لا	لا	ربما	ربما	لا	ربما	ربما	نعم	ربما	لا	لا	نعم	نعم	نعم	لا	لا	لا	نعم	لا
أنثى	18-25 سنة	أعزب\عزباء	أقل من 6000 جنيه مصري	ريف	جامعة بكالوريوس /دبلوم	جامعة بكالوريوس /دبلوم	جامعة بكالوريوس /دبلوم	عاطل عن العمل	لا	لا	ليس لدي شريك	لا	نعم	الأصدقاء	نعم	لا	لا	ربما	نعم	لا	لا	لا	لا	لا	لا	لا	لا	لا	ربما	لا	لا	نعم	نعم	نعم	نعم	نعم	نعم	نعم	لا	لا
ذكر	36-50 سنة	متزوج/ة	6000-12000 جنيه مصري	مدينة	جامعة بكالوريوس /دبلوم	ابتدائي	ابتدائي	عامل	لا	لا	لا	لا	نعم	الصحف - الكتب - المجلات	ربما	ربما	ربما	ربما	نعم	لا	لا	ربما	ربما	ربما	نعم	لا	ربما	ربما	لا	ربما	لا	نعم	ربما	نعم	ربما	نعم	لا	ربما	ربما	لا
ذكر	26-35 سنة	متزوج/ة	أقل من 6000 جنيه مصري	مدينة	جامعة بكالوريوس /دبلوم	جامعة بكالوريوس /دبلوم	ابتدائي	عامل	نعم	لا	لا	لا	نعم	الإنترنت	نعم	ربما	نعم	ربما	نعم	لا	لا	لا	لا	لا	ربما	لا	لا	لا	ربما	لا	لا	ربما	ربما	نعم	لا	نعم	لا	لا	ربما	لا
أنثى	18-25 سنة	أعزب\عزباء	أقل من 6000 جنيه مصري	ريف	ثانوي	ابتدائي	ابتدائي	عامل	لا	نعم	لا	لا	لا	أخرى	ربما	ربما	نعم	ربما	نعم	ربما	لا	ربما	ربما	ربما	ربما	ربما	ربما	ربما	ربما	لا	لا	ربما	لا	لا	نعم	نعم	لا	نعم	نعم	لا
أنثى	36-50 سنة	متزوج/ة	أقل من 6000 جنيه مصري	ريف	ثانوي	ابتدائي	ابتدائي	مربية منزل	لا	لا	لا	لا	نعم	أخرى	نعم	نعم	نعم	نعم	نعم	لا	لا	لا	لا	ربما	ربما	ربما	نعم	لا	ربما	لا	لا	ربما	ربما	ربما	ربما	ربما	ربما	ربما	نعم	لا
ذكر	36-50 سنة	متزوج/ة	أقل من 6000 جنيه مصري	ريف	جامعة بكالوريوس /دبلوم	ابتدائي	ابتدائي	عامل	لا	لا	لا	لا	نعم	أخرى	ربما	ربما	ربما	نعم	ربما	نعم	نعم	نعم	ربما	نعم	لا	نعم	نعم	نعم	لا	لا	نعم	نعم	لا	لا	لا	لا	لا	لا	ربما	لا
أنثى	18-25 سنة	أعزب\عزباء	أقل من 6000 جنيه مصري	ريف	جامعة بكالوريوس /دبلوم	ثانوي	ثانوي	طالب	لا	لا	ليس لدي شريك	لا	لا	الصحف - الكتب - المجلات	نعم	ربما	ربما	ربما	نعم	ربما	ربما	ربما	ربما	ربما	ربما	ربما	ربما	ربما	ربما	ربما	ربما	ربما	لا	لا	ربما	ربما	ربما	نعم	نعم	نعم
أنثى	51 سنة فأكثر	متزوج/ة	أقل من 6000 جنيه مصري	ريف	جامعة بكالوريوس /دبلوم	ابتدائي	ابتدائي	مربية منزل	لا	لا	لا	لا	نعم	الأهل, الأصدقاء	نعم	ربما	نعم	ربما	نعم	لا	لا	لا	لا	نعم	لا	لا	نعم	لا	لا	لا	لا	ربما	ربما	نعم	نعم	نعم	لا	لا	ربما	لا
أنثى	26-35 سنة	متزوج/ة	أقل من 6000 جنيه مصري	ريف	جامعة بكالوريوس /دبلوم	جامعة بكالوريوس /دبلوم	جامعة بكالوريوس /دبلوم	مربية منزل	لا	لا	لا	لا	لا	الإنترنت	ربما	ربما	ربما	لا	ربما	ربما	ربما	ربما	ربما	ربما	ربما	ربما	لا	ربما	ربما	ربما	ربما	ربما	نعم	نعم	نعم	نعم	نعم	نعم	لا	لا
أنثى	26-35 سنة	متزوج/ة	أقل من 6000 جنيه مصري	ريف	ثانوي	ابتدائي	ابتدائي	عامل	نعم	لا	لا	لا	نعم	أخرى	نعم	نعم	نعم	نعم	نعم	لا	لا	لا	لا	نعم	نعم	لا	لا	نعم	نعم	لا	لا	نعم	ربما	نعم	ربما	ربما	ربما	نعم	ربما	لا
ذكر	18-25 سنة	أعزب\عزباء	6000-12000 جنيه مصري	ريف	شهادات عليا	جامعة بكالوريوس /دبلوم	جامعة بكالوريوس /دبلوم	طالب	نعم	لا	لا	لا	نعم	الإنترنت, التلفاز, المدرسة, الأهل, الأصدقاء, الصحف - الكتب - المجلات	نعم	نعم	لا	ربما	نعم	لا	لا	لا	لا	لا	نعم	لا	نعم	لا	لا	لا	لا	نعم	نعم	نعم	نعم	نعم	نعم	نعم	لا	لا
ذكر	18-25 سنة	أعزب\عزباء	أقل من 6000 جنيه مصري	ريف	جامعة بكالوريوس /دبلوم	جامعة بكالوريوس /دبلوم	جامعة بكالوريوس /دبلوم	طالب	نعم	نعم	ليس لدي شريك	لا	نعم	الأهل	نعم	ربما	لا	ربما	نعم	لا	لا	لا	لا	ربما	ربما	ربما	ربما	ربما	ربما	لا	لا	لا	نعم	نعم	نعم	نعم	لا	لا	لا	لا
ذكر	18-25 سنة	أعزب\عزباء	أقل من 6000 جنيه مصري	ريف	شهادات عليا	شهادات عليا	جامعة بكالوريوس /دبلوم	طالب	نعم	لا	ليس لدي شريك	لا	نعم	الصحف - الكتب - المجلات	نعم	نعم	ربما	ربما	نعم	لا	لا	لا	لا	لا	نعم	لا	لا	ربما	لا	لا	لا	نعم	نعم	نعم	نعم	نعم	لا	ربما	ربما	لا
ذكر	26-35 سنة	أعزب\عزباء	أقل من 6000 جنيه مصري	ريف	جامعة بكالوريوس /دبلوم	ابتدائي	ثانوي	عامل	نعم	لا	ليس لدي شريك	لا	نعم	أخرى	نعم	نعم	لا	ربما	نعم	لا	ربما	ربما	لا	لا	ربما	لا	ربما	لا	ربما	لا	لا	لا	نعم	نعم	نعم	نعم	نعم	نعم	نعم	لا
أنثى	26-35 سنة	متزوج/ة	6000-12000 جنيه مصري	ريف	ثانوي	ابتدائي	ابتدائي	عامل	نعم	لا	لا	لا	نعم	الأصدقاء	نعم	لا	نعم	نعم	نعم	لا	لا	لا	لا	لا	ربما	لا	لا	لا	نعم	ربما	لا	نعم	لا	نعم	نعم	نعم	لا	لا	لا	لا
ذكر	26-35 سنة	أعزب\عزباء	أقل من 6000 جنيه مصري	ريف	جامعة بكالوريوس /دبلوم	جامعة بكالوريوس /دبلوم	جامعة بكالوريوس /دبلوم	عامل	نعم	لا	ليس لدي شريك	لا	نعم	الصحف - الكتب - المجلات, الطبيب	نعم	نعم	نعم	ربما	نعم	لا	لا	لا	لا	لا	لا	لا	ربما	لا	ربما	لا	لا	نعم	نعم	نعم	نعم	نعم	نعم	نعم	ربما	لا
ذكر	26-35 سنة	متزوج/ة	أقل من 6000 جنيه مصري	ريف	شهادات عليا	جامعة بكالوريوس /دبلوم	جامعة بكالوريوس /دبلوم	عامل	لا	لا	لا	لا	نعم	الإنترنت, التلفاز, الأهل, الأصدقاء	نعم	نعم	لا	نعم	نعم	لا	لا	لا	لا	لا	لا	لا	نعم	لا	لا	لا	لا	نعم	نعم	نعم	نعم	نعم	لا	لا	لا	لا
ذكر	26-35 سنة	أعزب\عزباء	6000-12000 جنيه مصري	ريف	جامعة بكالوريوس /دبلوم	ثانوي	ثانوي	طالب	نعم	لا	لا	لا	نعم	الإنترنت	نعم	نعم	نعم	نعم	نعم	لا	لا	لا	لا	لا	نعم	لا	نعم	لا	ربما	لا	لا	ربما	نعم	نعم	نعم	نعم	لا	نعم	نعم	نعم
أنثى	18-25 سنة	أعزب\عزباء	أقل من 6000 جنيه مصري	مدينة	جامعة بكالوريوس /دبلوم	جامعة بكالوريوس /دبلوم	جامعة بكالوريوس /دبلوم	طالب	نعم	لا	ليس لدي شريك	لا	نعم	المدرسة, الصحف - الكتب - المجلات	نعم	ربما	لا	لا	نعم	لا	لا	لا	لا	لا	لا	لا	لا	لا	ربما	لا	لا	ربما	نعم	نعم	نعم	نعم	ربما	ربما	لا	لا
ذكر	18-25 سنة	أعزب\عزباء	أكثر من 12000 جنيه مصري	مدينة	جامعة بكالوريوس /دبلوم	شهادات عليا	شهادات عليا	طالب	نعم	لا	ليس لدي شريك	لا	نعم	الإنترنت, التلفاز, أخرى	نعم	لا	لا	لا	نعم	لا	لا	لا	لا	لا	نعم	لا	نعم	لا	نعم	لا	لا	ربما	نعم	نعم	نعم	نعم	لا	لا	لا	لا
أنثى	18-25 سنة	أعزب\عزباء	أقل من 6000 جنيه مصري	ريف	جامعة بكالوريوس /دبلوم	شهادات عليا	جامعة بكالوريوس /دبلوم	طالب	لا	نعم	لا	لا	نعم	أخرى	نعم	نعم	لا	نعم	نعم	نعم	لا	ربما	ربما	لا	لا	لا	ربما	لا	لا	لا	لا	نعم	نعم	نعم	نعم	ربما	لا	لا	ربما	لا
أنثى	18-25 سنة	أعزب\عزباء	6000-12000 جنيه مصري	مدينة	جامعة بكالوريوس /دبلوم	جامعة بكالوريوس /دبلوم	ثانوي	طالب	نعم	لا	ليس لدي شريك	لا	نعم	الإنترنت, الأهل, الأصدقاء, الطبيب, أخرى	نعم	نعم	نعم	نعم	نعم	لا	لا	لا	لا	لا	نعم	لا	لا	لا	لا	لا	لا	ربما	نعم	نعم	نعم	ربما	لا	لا	ربما	لا
أنثى	18-25 سنة	أعزب\عزباء	6000-12000 جنيه مصري	مدينة	جامعة بكالوريوس /دبلوم	ثانوي	ثانوي	طالب	نعم	لا	ليس لدي شريك	لا	نعم	الإنترنت, التلفاز, الأصدقاء, أخرى	نعم	ربما	لا	لا	نعم	لا	لا	لا	لا	لا	ربما	لا	ربما	لا	ربما	لا	لا	ربما	نعم	نعم	نعم	نعم	ربما	ربما	لا	لا
أنثى	18-25 سنة	أعزب\عزباء	أقل من 6000 جنيه مصري	ريف	جامعة بكالوريوس /دبلوم	جامعة بكالوريوس /دبلوم	جامعة بكالوريوس /دبلوم	متقاعد	لا	لا	ليس لدي شريك	لا	نعم	الأصدقاء	ربما	ربما	ربما	ربما	نعم	لا	لا	لا	لا	ربما	ربما	ربما	ربما	ربما	ربما	لا	لا	نعم	نعم	نعم	نعم	نعم	نعم	نعم	لا	لا
ذكر	18-25 سنة	أعزب\عزباء	6000-12000 جنيه مصري	ريف	جامعة بكالوريوس /دبلوم	جامعة بكالوريوس /دبلوم	جامعة بكالوريوس /دبلوم	طالب	نعم	لا	ليس لدي شريك	لا	نعم	الإنترنت, أخرى	نعم	ربما	نعم	نعم	نعم	لا	لا	لا	لا	لا	ربما	ربما	نعم	لا	ربما	لا	لا	لا	نعم	نعم	نعم	نعم	لا	ربما	ربما	لا
أنثى	18-25 سنة	أعزب\عزباء	أقل من 6000 جنيه مصري	ريف	جامعة بكالوريوس /دبلوم	ثانوي	ثانوي	طالب	نعم	لا	لا	لا	نعم	الأصدقاء	نعم	نعم	نعم	لا	نعم	لا	لا	لا	لا	لا	لا	لا	لا	لا	لا	لا	لا	لا	ربما	نعم	نعم	نعم	ربما	لا	ربما	ربما
ذكر	18-25 سنة	أعزب\عزباء	أقل من 6000 جنيه مصري	ريف	جامعة بكالوريوس /دبلوم	جامعة بكالوريوس /دبلوم	جامعة بكالوريوس /دبلوم	طالب	نعم	لا	ليس لدي شريك	لا	نعم	الإنترنت, الصحف - الكتب - المجلات	نعم	نعم	لا	نعم	نعم	لا	لا	لا	لا	لا	لا	لا	نعم	لا	لا	لا	لا	نعم	نعم	نعم	نعم	نعم	نعم	نعم	لا	لا
ذكر	18-25 سنة	أعزب\عزباء	6000-12000 جنيه مصري	ريف	جامعة بكالوريوس /دبلوم	شهادات عليا	ثانوي	عامل	نعم	لا	ليس لدي شريك	لا	نعم	الأصدقاء, الصحف - الكتب - المجلات	نعم	نعم	ربما	نعم	نعم	لا	لا	لا	لا	لا	لا	لا	نعم	لا	ربما	لا	لا	نعم	نعم	نعم	نعم	نعم	نعم	نعم	لا	لا
ذكر	18-25 سنة	أعزب\عزباء	6000-12000 جنيه مصري	ريف	جامعة بكالوريوس /دبلوم	جامعة بكالوريوس /دبلوم	جامعة بكالوريوس /دبلوم	طالب	نعم	لا	لا	لا	نعم	الصحف - الكتب - المجلات	نعم	لا	لا	ربما	نعم	لا	لا	لا	لا	لا	لا	لا	نعم	لا	نعم	لا	لا	ربما	نعم	نعم	نعم	نعم	لا	لا	لا	لا
أنثى	18-25 سنة	أعزب\عزباء	6000-12000 جنيه مصري	ريف	جامعة بكالوريوس /دبلوم	ابتدائي	ابتدائي	طالب	لا	لا	ليس لدي شريك	لا	نعم	الصحف - الكتب - المجلات	نعم	ربما	ربما	ربما	نعم	ربما	ربما	ربما	ربما	ربما	ربما	ربما	ربما	ربما	ربما	ربما	نعم	نعم	لا	نعم	نعم	نعم	لا	لا	نعم	لا
أنثى	18-25 سنة	أعزب\عزباء	6000-12000 جنيه مصري	ريف	جامعة بكالوريوس /دبلوم	جامعة بكالوريوس /دبلوم	جامعة بكالوريوس /دبلوم	طالب	نعم	لا	ليس لدي شريك	لا	نعم	الإنترنت, التلفاز, الأصدقاء	نعم	نعم	لا	لا	نعم	لا	لا	لا	لا	لا	ربما	لا	ربما	لا	ربما	لا	لا	لا	نعم	نعم	نعم	نعم	نعم	نعم	لا	لا
أنثى	18-25 سنة	أعزب\عزباء	6000-12000 جنيه مصري	ريف	جامعة بكالوريوس /دبلوم	شهادات عليا	شهادات عليا	طالب	نعم	لا	لا	لا	نعم	الإنترنت	نعم	نعم	نعم	نعم	لا	نعم	ربما	لا	لا	لا	لا	لا	نعم	لا	ربما	ربما	لا	نعم	نعم	نعم	نعم	نعم	نعم	نعم	لا	لا
أنثى	18-25 سنة	أعزب\عزباء	أكثر من 12000 جنيه مصري	مدينة	جامعة بكالوريوس /دبلوم	شهادات عليا	شهادات عليا	طالب	نعم	لا	ليس لدي شريك	لا	نعم	الإنترنت, التلفاز, الصحف - الكتب - المجلات, أخرى	نعم	نعم	ربما	لا	نعم	ربما	لا	لا	لا	لا	ربما	لا	ربما	لا	لا	لا	لا	ربما	نعم	نعم	نعم	نعم	نعم	نعم	لا	لا
أنثى	18-25 سنة	أعزب\عزباء	أقل من 6000 جنيه مصري	مدينة	جامعة بكالوريوس /دبلوم	جامعة بكالوريوس /دبلوم	جامعة بكالوريوس /دبلوم	طالب	نعم	لا	لا	لا	نعم	الإنترنت	نعم	نعم	لا	لا	نعم	لا	لا	لا	لا	لا	لا	لا	لا	لا	لا	لا	لا	نعم	نعم	نعم	نعم	نعم	نعم	نعم	لا	لا
أنثى	18-25 سنة	أعزب\عزباء	أقل من 6000 جنيه مصري	ريف	جامعة بكالوريوس /دبلوم	جامعة بكالوريوس /دبلوم	جامعة بكالوريوس /دبلوم	طالب	نعم	لا	لا	لا	لا	الأصدقاء	لا	ربما	لا	نعم	نعم	لا	لا	لا	لا	لا	ربما	لا	لا	ربما	ربما	ربما	لا	ربما	لا	لا	لا	لا	لا	لا	لا	لا
أنثى	18-25 سنة	أعزب\عزباء	أقل من 6000 جنيه مصري	مدينة	شهادات عليا	جامعة بكالوريوس /دبلوم	جامعة بكالوريوس /دبلوم	طالب	نعم	لا	ليس لدي شريك	لا	نعم	الإنترنت, التلفاز, الأهل, الأصدقاء, الصحف - الكتب - المجلات, أخرى	نعم	نعم	ربما	نعم	نعم	لا	لا	لا	ربما	لا	ربما	لا	نعم	لا	نعم	لا	لا	ربما	نعم	نعم	نعم	نعم	ربما	نعم	لا	لا
أنثى	18-25 سنة	أعزب\عزباء	6000-12000 جنيه مصري	مدينة	جامعة بكالوريوس /دبلوم	جامعة بكالوريوس /دبلوم	جامعة بكالوريوس /دبلوم	طالب	نعم	لا	لا	لا	نعم	المدرسة	نعم	نعم	ربما	لا	نعم	لا	لا	لا	لا	لا	لا	لا	نعم	لا	ربما	لا	لا	نعم	نعم	نعم	نعم	نعم	ربما	ربما	ربما	لا
أنثى	18-25 سنة	أعزب\عزباء	أقل من 6000 جنيه مصري	مدينة	جامعة بكالوريوس /دبلوم	شهادات عليا	شهادات عليا	طالب	نعم	لا	ليس لدي شريك	لا	نعم	الإنترنت, التلفاز, المدرسة, الأهل, الأصدقاء, الصحف - الكتب - المجلات, الطبيب, أخرى	ربما	نعم	لا	لا	نعم	لا	لا	لا	لا	ربما	نعم	نعم	ربما	نعم	نعم	لا	لا	لا	نعم	نعم	نعم	نعم	ربما	ربما	لا	لا
أنثى	18-25 سنة	أعزب\عزباء	6000-12000 جنيه مصري	ريف	جامعة بكالوريوس /دبلوم	جامعة بكالوريوس /دبلوم	جامعة بكالوريوس /دبلوم	طالب	نعم	لا	ليس لدي شريك	لا	نعم	الأهل	نعم	لا	نعم	لا	نعم	لا	ربما	لا	لا	لا	ربما	ربما	نعم	لا	نعم	نعم	لا	ربما	نعم	نعم	نعم	نعم	لا	لا	نعم	ربما
أنثى	18-25 سنة	أعزب\عزباء	أقل من 6000 جنيه مصري	ريف	ثانوي	ابتدائي	ابتدائي	طالب	لا	لا	ليس لدي شريك	لا	لا	التلفاز	نعم	نعم	نعم	ربما	ربما	ربما	ربما	لا	لا	لا	لا	لا	لا	لا	لا	لا	لا	لا	ربما	نعم	ربما	لا	ربما	ربما	لا	لا
أنثى	18-25 سنة	أعزب\عزباء	أقل من 6000 جنيه مصري	ريف	ثانوي	ثانوي	ابتدائي	طالب	نعم	لا	ليس لدي شريك	لا	نعم	الأهل	نعم	ربما	ربما	ربما	ربما	لا	لا	لا	لا	لا	لا	لا	نعم	لا	ربما	لا	لا	لا	نعم	نعم	نعم	نعم	ربما	ربما	لا	لا
أنثى	18-25 سنة	أعزب\عزباء	6000-12000 جنيه مصري	مدينة	جامعة بكالوريوس /دبلوم	جامعة بكالوريوس /دبلوم	جامعة بكالوريوس /دبلوم	طالب	نعم	لا	ليس لدي شريك	لا	نعم	الإنترنت, التلفاز, الصحف - الكتب - المجلات	نعم	نعم	لا	ربما	نعم	لا	لا	لا	لا	لا	لا	نعم	نعم	لا	نعم	لا	لا	نعم	نعم	نعم	نعم	نعم	نعم	نعم	لا	لا
أنثى	18-25 سنة	أعزب\عزباء	أكثر من 12000 جنيه مصري	مدينة	جامعة بكالوريوس /دبلوم	ابتدائي	ابتدائي	طالب	لا	لا	لا	لا	نعم	الإنترنت, الأهل, الأصدقاء, الطبيب, أخرى	نعم	نعم	لا	لا	نعم	لا	لا	نعم	لا	نعم	نعم	لا	لا	لا	نعم	لا	لا	نعم	ربما	نعم	نعم	ربما	ربما	ربما	لا	لا
أنثى	18-25 سنة	أعزب\عزباء	6000-12000 جنيه مصري	مدينة	جامعة بكالوريوس /دبلوم	جامعة بكالوريوس /دبلوم	جامعة بكالوريوس /دبلوم	طالب	لا	لا	ليس لدي شريك	لا	نعم	الأهل	نعم	نعم	لا	لا	نعم	لا	لا	لا	لا	لا	لا	لا	لا	لا	لا	لا	لا	ربما	نعم	نعم	نعم	نعم	ربما	ربما	لا	لا
أنثى	18-25 سنة	متزوج/ة	أقل من 6000 جنيه مصري	ريف	جامعة بكالوريوس /دبلوم	جامعة بكالوريوس /دبلوم	جامعة بكالوريوس /دبلوم	مربية منزل	لا	لا	لا	لا	نعم	الإنترنت	ربما	ربما	ربما	ربما	نعم	لا	لا	لا	لا	لا	لا	لا	ربما	لا	لا	لا	لا	ربما	ربما	نعم	نعم	نعم	نعم	نعم	لا	لا
أنثى	18-25 سنة	أعزب\عزباء	أكثر من 12000 جنيه مصري	مدينة	ثانوي	ثانوي	جامعة بكالوريوس /دبلوم	عامل	نعم	لا	ليس لدي شريك	لا	نعم	المدرسة, الأهل	نعم	ربما	ربما	ربما	نعم	لا	لا	لا	لا	لا	نعم	لا	ربما	لا	ربما	لا	لا	ربما	نعم	نعم	نعم	نعم	ربما	ربما	ربما	لا
أنثى	18-25 سنة	أعزب\عزباء	6000-12000 جنيه مصري	ريف	جامعة بكالوريوس /دبلوم	جامعة بكالوريوس /دبلوم	جامعة بكالوريوس /دبلوم	طالب	نعم	لا	لا	لا	نعم	الأهل, أخرى	نعم	ربما	ربما	ربما	نعم	لا	لا	ربما	لا	لا	ربما	لا	لا	لا	لا	ربما	لا	نعم	نعم	نعم	نعم	نعم	ربما	ربما	ربما	لا
أنثى	18-25 سنة	أعزب\عزباء	أقل من 6000 جنيه مصري	مدينة	جامعة بكالوريوس /دبلوم	جامعة بكالوريوس /دبلوم	جامعة بكالوريوس /دبلوم	عامل	لا	لا	ليس لدي شريك	لا	نعم	الإنترنت, الأهل, الطبيب	نعم	نعم	لا	لا	نعم	لا	لا	لا	لا	ربما	ربما	لا	نعم	لا	لا	لا	لا	نعم	نعم	نعم	نعم	نعم	نعم	نعم	لا	لا
أنثى	18-25 سنة	أعزب\عزباء	6000-12000 جنيه مصري	مدينة	جامعة بكالوريوس /دبلوم	جامعة بكالوريوس /دبلوم	جامعة بكالوريوس /دبلوم	طالب	نعم	لا	ليس لدي شريك	لا	نعم	التلفاز, المدرسة	نعم	نعم	نعم	نعم	نعم	لا	لا	لا	لا	لا	لا	لا	لا	لا	لا	لا	لا	لا	نعم	نعم	نعم	نعم	لا	نعم	نعم	لا
أنثى	18-25 سنة	أعزب\عزباء	6000-12000 جنيه مصري	مدينة	جامعة بكالوريوس /دبلوم	جامعة بكالوريوس /دبلوم	جامعة بكالوريوس /دبلوم	طالب	نعم	لا	ليس لدي شريك	لا	نعم	الإنترنت, الصحف - الكتب - المجلات, أخرى	نعم	لا	ربما	ربما	نعم	لا	لا	لا	لا	لا	لا	لا	نعم	لا	لا	لا	لا	ربما	نعم	نعم	نعم	نعم	لا	ربما	لا	لا
أنثى	18-25 سنة	أعزب\عزباء	أقل من 6000 جنيه مصري	ريف	جامعة بكالوريوس /دبلوم	ثانوي	ابتدائي	عامل	نعم	لا	لا	لا	نعم	الإنترنت	نعم	نعم	لا	نعم	نعم	لا	لا	لا	لا	لا	نعم	لا	ربما	لا	ربما	لا	لا	لا	نعم	نعم	نعم	نعم	لا	لا	ربما	لا
أنثى	18-25 سنة	أعزب\عزباء	أقل من 6000 جنيه مصري	ريف	جامعة بكالوريوس /دبلوم	جامعة بكالوريوس /دبلوم	جامعة بكالوريوس /دبلوم	طالب	نعم	نعم	ليس لدي شريك	لا	نعم	الأهل	نعم	ربما	ربما	ربما	ربما	ربما	لا	ربما	ربما	نعم	لا	ربما	ربما	ربما	ربما	ربما	ربما	ربما	ربما	ربما	ربما	ربما	ربما	ربما	ربما	ربما
أنثى	18-25 سنة	أعزب\عزباء	أقل من 6000 جنيه مصري	مدينة	جامعة بكالوريوس /دبلوم	جامعة بكالوريوس /دبلوم	جامعة بكالوريوس /دبلوم	طالب	نعم	لا	لا	لا	نعم	المدرسة, الأصدقاء, الصحف - الكتب - المجلات	ربما	نعم	نعم	نعم	نعم	لا	لا	لا	لا	ربما	ربما	لا	نعم	ربما	ربما	لا	لا	لا	نعم	نعم	نعم	نعم	نعم	ربما	ربما	لا
أنثى	18-25 سنة	أعزب\عزباء	أقل من 6000 جنيه مصري	ريف	جامعة بكالوريوس /دبلوم	جامعة بكالوريوس /دبلوم	جامعة بكالوريوس /دبلوم	طالب	نعم	نعم	ليس لدي شريك	نعم	نعم	الإنترنت	نعم	نعم	ربما	نعم	ربما	لا	لا	لا	لا	لا	ربما	ربما	نعم	لا	لا	ربما	لا	نعم	نعم	نعم	نعم	نعم	نعم	نعم	لا	لا
أنثى	18-25 سنة	أعزب\عزباء	6000-12000 جنيه مصري	ريف	جامعة بكالوريوس /دبلوم	جامعة بكالوريوس /دبلوم	جامعة بكالوريوس /دبلوم	طالب	لا	لا	لا	لا	نعم	الإنترنت	نعم	ربما	ربما	ربما	ربما	لا	ربما	ربما	ربما	ربما	ربما	ربما	ربما	ربما	ربما	ربما	ربما	ربما	ربما	ربما	ربما	ربما	ربما	ربما	ربما	ربما
أنثى	18-25 سنة	أعزب\عزباء	أقل من 6000 جنيه مصري	مدينة	جامعة بكالوريوس /دبلوم	ابتدائي	ابتدائي	عامل	نعم	لا	ليس لدي شريك	لا	نعم	الإنترنت	نعم	ربما	نعم	نعم	نعم	ربما	لا	نعم	ربما	نعم	ربما	لا	ربما	ربما	ربما	لا	لا	نعم	ربما	ربما	ربما	ربما	ربما	ربما	ربما	ربما
أنثى	18-25 سنة	أعزب\عزباء	أقل من 6000 جنيه مصري	مدينة	جامعة بكالوريوس /دبلوم	جامعة بكالوريوس /دبلوم	جامعة بكالوريوس /دبلوم	طالب	لا	لا	لا	لا	نعم	الإنترنت	نعم	لا	لا	ربما	نعم	لا	لا	لا	لا	لا	لا	لا	ربما	لا	لا	لا	لا	ربما	نعم	نعم	نعم	نعم	ربما	ربما	لا	لا
أنثى	18-25 سنة	أعزب\عزباء	أقل من 6000 جنيه مصري	ريف	جامعة بكالوريوس /دبلوم	ثانوي	ثانوي	طالب	لا	لا	لا	لا	نعم	الإنترنت	ربما	نعم	لا	لا	ربما	لا	لا	لا	لا	لا	لا	لا	ربما	لا	نعم	لا	ربما	ربما	نعم	نعم	نعم	ربما	نعم	لا	ربما	لا
أنثى	18-25 سنة	أعزب\عزباء	أقل من 6000 جنيه مصري	ريف	ثانوي	جامعة بكالوريوس /دبلوم	جامعة بكالوريوس /دبلوم	طالب	لا	لا	لا	لا	نعم	الأهل	ربما	نعم	لا	ربما	نعم	نعم	ربما	نعم	ربما	لا	نعم	لا	لا	لا	ربما	لا	لا	ربما	نعم	نعم	نعم	ربما	ربما	ربما	لا	لا
أنثى	18-25 سنة	أعزب\عزباء	6000-12000 جنيه مصري	مدينة	جامعة بكالوريوس /دبلوم	جامعة بكالوريوس /دبلوم	جامعة بكالوريوس /دبلوم	طالب	لا	لا	ليس لدي شريك	لا	نعم	الإنترنت, التلفاز, الأصدقاء	نعم	لا	لا	لا	نعم	لا	لا	لا	لا	لا	لا	لا	لا	لا	لا	لا	لا	ربما	نعم	نعم	نعم	نعم	نعم	نعم	لا	لا
أنثى	18-25 سنة	أعزب\عزباء	6000-12000 جنيه مصري	ريف	جامعة بكالوريوس /دبلوم	جامعة بكالوريوس /دبلوم	جامعة بكالوريوس /دبلوم	عامل	نعم	لا	لا	لا	نعم	الصحف - الكتب - المجلات	نعم	نعم	ربما	لا	نعم	لا	لا	لا	لا	لا	لا	لا	ربما	لا	لا	لا	لا	ربما	نعم	نعم	نعم	نعم	ربما	ربما	لا	لا
أنثى	18-25 سنة	أعزب\عزباء	6000-12000 جنيه مصري	مدينة	جامعة بكالوريوس /دبلوم	جامعة بكالوريوس /دبلوم	جامعة بكالوريوس /دبلوم	طالب	لا	لا	ليس لدي شريك	لا	نعم	الإنترنت, التلفاز, الأهل	نعم	نعم	نعم	نعم	نعم	لا	لا	لا	لا	لا	لا	لا	لا	لا	ربما	لا	لا	لا	نعم	نعم	نعم	نعم	نعم	نعم	لا	لا
أنثى	18-25 سنة	أعزب\عزباء	أقل من 6000 جنيه مصري	ريف	جامعة بكالوريوس /دبلوم	جامعة بكالوريوس /دبلوم	جامعة بكالوريوس /دبلوم	طالب	نعم	لا	لا	لا	نعم	الإنترنت	نعم	نعم	لا	لا	نعم	لا	لا	لا	لا	لا	لا	لا	لا	لا	لا	لا	لا	لا	نعم	نعم	نعم	نعم	نعم	نعم	لا	لا
أنثى	18-25 سنة	أعزب\عزباء	أقل من 6000 جنيه مصري	ريف	شهادات عليا	جامعة بكالوريوس /دبلوم	ابتدائي	طالب	لا	لا	ليس لدي شريك	لا	نعم	أخرى	نعم	نعم	نعم	نعم	نعم	نعم	ربما	نعم	ربما	نعم	نعم	ربما	نعم	نعم	نعم	ربما	ربما	نعم	ربما	ربما	ربما	لا	لا	ربما	ربما	لا
أنثى	18-25 سنة	أعزب\عزباء	أقل من 6000 جنيه مصري	مدينة	جامعة بكالوريوس /دبلوم	جامعة بكالوريوس /دبلوم	جامعة بكالوريوس /دبلوم	طالب	لا	لا	ليس لدي شريك	لا	نعم	أخرى	لا	ربما	لا	ربما	نعم	لا	لا	لا	لا	لا	لا	لا	ربما	لا	لا	لا	لا	نعم	نعم	نعم	نعم	نعم	نعم	نعم	لا	لا
أنثى	18-25 سنة	أعزب\عزباء	أقل من 6000 جنيه مصري	ريف	ثانوي	ابتدائي	جامعة بكالوريوس /دبلوم	طالب	لا	لا	ليس لدي شريك	لا	نعم	الأصدقاء	نعم	ربما	ربما	ربما	ربما	لا	لا	لا	لا	ربما	ربما	ربما	ربما	ربما	ربما	لا	لا	لا	نعم	نعم	نعم	نعم	ربما	ربما	ربما	لا
أنثى	18-25 سنة	أعزب\عزباء	أقل من 6000 جنيه مصري	ريف	جامعة بكالوريوس /دبلوم	شهادات عليا	جامعة بكالوريوس /دبلوم	طالب	نعم	لا	ليس لدي شريك	لا	نعم	الإنترنت, الأهل, الأصدقاء, الصحف - الكتب - المجلات, الطبيب	ربما	نعم	ربما	نعم	نعم	لا	لا	ربما	لا	لا	ربما	لا	نعم	نعم	نعم	نعم	لا	نعم	نعم	نعم	نعم	نعم	نعم	نعم	لا	لا
أنثى	18-25 سنة	أعزب\عزباء	6000-12000 جنيه مصري	ريف	جامعة بكالوريوس /دبلوم	شهادات عليا	جامعة بكالوريوس /دبلوم	طالب	نعم	لا	لا	لا	نعم	الإنترنت, التلفاز, المدرسة, الأصدقاء, الصحف - الكتب - المجلات	نعم	ربما	ربما	ربما	ربما	لا	ربما	ربما	لا	ربما	ربما	ربما	ربما	ربما	ربما	ربما	ربما	ربما	نعم	نعم	نعم	نعم	لا	لا	لا	لا
أنثى	18-25 سنة	أعزب\عزباء	6000-12000 جنيه مصري	ريف	جامعة بكالوريوس /دبلوم	ثانوي	ابتدائي	طالب	نعم	لا	لا	لا	نعم	الإنترنت	نعم	لا	ربما	لا	نعم	لا	لا	لا	لا	لا	لا	لا	لا	لا	لا	لا	لا	نعم	نعم	نعم	نعم	نعم	نعم	نعم	لا	لا
أنثى	18-25 سنة	أعزب\عزباء	6000-12000 جنيه مصري	مدينة	جامعة بكالوريوس /دبلوم	جامعة بكالوريوس /دبلوم	جامعة بكالوريوس /دبلوم	طالب	لا	لا	لا	لا	نعم	الطبيب	نعم	نعم	نعم	ربما	نعم	لا	لا	نعم	لا	لا	لا	لا	ربما	لا	ربما	لا	لا	نعم	نعم	نعم	نعم	نعم	نعم	لا	لا	لا
أنثى	18-25 سنة	أعزب\عزباء	أقل من 6000 جنيه مصري	ريف	جامعة بكالوريوس /دبلوم	جامعة بكالوريوس /دبلوم	جامعة بكالوريوس /دبلوم	طالب	لا	لا	لا	لا	نعم	الإنترنت, التلفاز, المدرسة, الأهل, الأصدقاء, أخرى	نعم	ربما	لا	ربما	نعم	لا	ربما	ربما	لا	ربما	ربما	ربما	لا	ربما	لا	لا	لا	لا	نعم	نعم	نعم	نعم	نعم	نعم	لا	لا
أنثى	18-25 سنة	أعزب\عزباء	6000-12000 جنيه مصري	ريف	جامعة بكالوريوس /دبلوم	جامعة بكالوريوس /دبلوم	جامعة بكالوريوس /دبلوم	طالب	نعم	لا	ليس لدي شريك	لا	نعم	الإنترنت, التلفاز	نعم	لا	لا	نعم	نعم	لا	لا	لا	لا	لا	لا	لا	ربما	لا	لا	لا	لا	نعم	نعم	نعم	نعم	نعم	ربما	نعم	لا	لا
أنثى	18-25 سنة	أعزب\عزباء	أقل من 6000 جنيه مصري	ريف	جامعة بكالوريوس /دبلوم	ثانوي	ثانوي	طالب	نعم	لا	لا	لا	نعم	الأهل	نعم	لا	نعم	لا	نعم	لا	لا	لا	لا	لا	لا	لا	لا	لا	ربما	لا	لا	لا	نعم	نعم	نعم	نعم	نعم	نعم	لا	لا
أنثى	18-25 سنة	أعزب\عزباء	6000-12000 جنيه مصري	مدينة	جامعة بكالوريوس /دبلوم	جامعة بكالوريوس /دبلوم	جامعة بكالوريوس /دبلوم	طالب	لا	لا	ليس لدي شريك	لا	نعم	الأهل	نعم	لا	لا	نعم	ربما	لا	لا	لا	لا	لا	نعم	لا	لا	لا	نعم	ربما	لا	لا	نعم	نعم	نعم	نعم	ربما	ربما	لا	لا
أنثى	18-25 سنة	أعزب\عزباء	أقل من 6000 جنيه مصري	مدينة	جامعة بكالوريوس /دبلوم	جامعة بكالوريوس /دبلوم	ثانوي	طالب	لا	لا	لا	لا	نعم	الإنترنت	نعم	نعم	نعم	لا	نعم	لا	لا	لا	لا	لا	نعم	لا	لا	لا	لا	لا	لا	نعم	نعم	نعم	نعم	نعم	نعم	نعم	لا	لا
أنثى	18-25 سنة	متزوج/ة	6000-12000 جنيه مصري	مدينة	شهادات عليا	جامعة بكالوريوس /دبلوم	جامعة بكالوريوس /دبلوم	عامل	لا	نعم	لا	لا	نعم	الأهل	نعم	نعم	ربما	نعم	نعم	لا	لا	لا	لا	لا	لا	لا	نعم	لا	ربما	لا	لا	نعم	نعم	نعم	نعم	نعم	نعم	نعم	لا	لا
أنثى	18-25 سنة	أعزب\عزباء	أقل من 6000 جنيه مصري	ريف	جامعة بكالوريوس /دبلوم	ابتدائي	جامعة بكالوريوس /دبلوم	طالب	نعم	لا	ليس لدي شريك	لا	نعم	الأهل	نعم	نعم	ربما	لا	نعم	لا	لا	لا	لا	لا	لا	لا	ربما	لا	ربما	لا	ربما	لا	نعم	نعم	نعم	نعم	ربما	ربما	ربما	لا
أنثى	18-25 سنة	أعزب\عزباء	أقل من 6000 جنيه مصري	ريف	جامعة بكالوريوس /دبلوم	جامعة بكالوريوس /دبلوم	جامعة بكالوريوس /دبلوم	طالب	نعم	لا	ليس لدي شريك	لا	نعم	أخرى	نعم	ربما	نعم	ربما	نعم	لا	لا	لا	لا	لا	ربما	لا	ربما	لا	ربما	ربما	لا	نعم	نعم	نعم	نعم	ربما	لا	لا	لا	لا
أنثى	18-25 سنة	أعزب\عزباء	أقل من 6000 جنيه مصري	ريف	جامعة بكالوريوس /دبلوم	ابتدائي	ابتدائي	طالب	نعم	لا	لا	لا	نعم	الأهل	نعم	نعم	ربما	ربما	نعم	لا	ربما	لا	لا	لا	نعم	نعم	ربما	ربما	ربما	ربما	لا	نعم	نعم	نعم	نعم	نعم	نعم	نعم	لا	لا
أنثى	18-25 سنة	أعزب\عزباء	6000-12000 جنيه مصري	ريف	شهادات عليا	جامعة بكالوريوس /دبلوم	جامعة بكالوريوس /دبلوم	طالب	لا	لا	نعم	لا	نعم	الإنترنت	ربما	ربما	نعم	نعم	نعم	نعم	نعم	ربما	نعم	لا	لا	لا	لا	ربما	لا	لا	نعم	نعم	لا	لا	لا	لا	لا	لا	نعم	ربما
أنثى	18-25 سنة	أعزب\عزباء	أقل من 6000 جنيه مصري	ريف	جامعة بكالوريوس /دبلوم	جامعة بكالوريوس /دبلوم	جامعة بكالوريوس /دبلوم	طالب	لا	لا	ليس لدي شريك	لا	نعم	الإنترنت, التلفاز, الأصدقاء	نعم	ربما	ربما	ربما	نعم	لا	لا	لا	لا	لا	لا	لا	ربما	لا	لا	لا	لا	ربما	نعم	نعم	نعم	نعم	ربما	ربما	ربما	لا
أنثى	18-25 سنة	أعزب\عزباء	أقل من 6000 جنيه مصري	ريف	جامعة بكالوريوس /دبلوم	شهادات عليا	شهادات عليا	طالب	لا	لا	لا	لا	نعم	الإنترنت	نعم	لا	لا	لا	نعم	لا	لا	لا	لا	لا	لا	لا	ربما	لا	ربما	لا	لا	ربما	نعم	نعم	نعم	نعم	نعم	نعم	لا	لا
أنثى	18-25 سنة	أعزب\عزباء	6000-12000 جنيه مصري	مدينة	جامعة بكالوريوس /دبلوم	جامعة بكالوريوس /دبلوم	جامعة بكالوريوس /دبلوم	طالب	لا	لا	ليس لدي شريك	لا	نعم	الإنترنت	نعم	نعم	ربما	نعم	نعم	لا	لا	لا	لا	لا	لا	لا	نعم	لا	لا	ربما	لا	لا	ربما	لا	لا	لا	لا	لا	نعم	ربما
أنثى	18-25 سنة	أعزب\عزباء	أكثر من 12000 جنيه مصري	مدينة	جامعة بكالوريوس /دبلوم	جامعة بكالوريوس /دبلوم	جامعة بكالوريوس /دبلوم	طالب	نعم	لا	ليس لدي شريك	لا	نعم	الأهل	نعم	لا	ربما	لا	نعم	لا	لا	لا	لا	لا	ربما	لا	نعم	لا	لا	لا	لا	لا	نعم	نعم	نعم	نعم	ربما	ربما	ربما	لا
أنثى	18-25 سنة	أعزب\عزباء	أقل من 6000 جنيه مصري	ريف	شهادات عليا	جامعة بكالوريوس /دبلوم	جامعة بكالوريوس /دبلوم	طالب	لا	لا	لا	لا	نعم	التلفاز	نعم	ربما	لا	ربما	ربما	لا	لا	لا	لا	لا	ربما	ربما	ربما	لا	ربما	لا	لا	ربما	نعم	نعم	نعم	نعم	ربما	ربما	ربما	لا
أنثى	18-25 سنة	أعزب\عزباء	6000-12000 جنيه مصري	ريف	جامعة بكالوريوس /دبلوم	جامعة بكالوريوس /دبلوم	جامعة بكالوريوس /دبلوم	طالب	نعم	لا	ليس لدي شريك	لا	نعم	الإنترنت, التلفاز, الأصدقاء	نعم	نعم	لا	نعم	نعم	لا	لا	لا	لا	لا	ربما	لا	ربما	لا	لا	لا	لا	ربما	نعم	نعم	نعم	نعم	ربما	نعم	لا	لا
أنثى	18-25 سنة	أعزب\عزباء	أقل من 6000 جنيه مصري	مدينة	جامعة بكالوريوس /دبلوم	جامعة بكالوريوس /دبلوم	ابتدائي	متقاعد	لا	لا	ليس لدي شريك	لا	نعم	الإنترنت, التلفاز, الأهل	نعم	نعم	ربما	ربما	نعم	لا	لا	لا	لا	لا	نعم	لا	ربما	لا	ربما	ربما	لا	لا	نعم	نعم	نعم	نعم	نعم	نعم	لا	لا
أنثى	18-25 سنة	أعزب\عزباء	6000-12000 جنيه مصري	ريف	جامعة بكالوريوس /دبلوم	جامعة بكالوريوس /دبلوم	جامعة بكالوريوس /دبلوم	طالب	لا	لا	ليس لدي شريك	لا	نعم	الإنترنت, التلفاز, الأهل, الأصدقاء, الصحف - الكتب - المجلات, الطبيب	نعم	ربما	ربما	ربما	ربما	لا	لا	لا	لا	ربما	ربما	لا	ربما	لا	ربما	لا	لا	ربما	ربما	ربما	ربما	لا	لا	لا	ربما	لا
أنثى	18-25 سنة	أعزب\عزباء	أقل من 6000 جنيه مصري	ريف	جامعة بكالوريوس /دبلوم	ثانوي	ثانوي	طالب	نعم	لا	ليس لدي شريك	لا	نعم	الأصدقاء	نعم	نعم	نعم	نعم	نعم	نعم	لا	نعم	ربما	ربما	نعم	ربما	نعم	ربما	ربما	لا	ربما	ربما	لا	لا	نعم	نعم	نعم	نعم	ربما	لا
أنثى	18-25 سنة	أعزب\عزباء	6000-12000 جنيه مصري	ريف	جامعة بكالوريوس /دبلوم	شهادات عليا	جامعة بكالوريوس /دبلوم	طالب	نعم	لا	ليس لدي شريك	لا	نعم	المدرسة	نعم	لا	ربما	لا	نعم	لا	لا	لا	لا	لا	لا	لا	لا	لا	ربما	لا	لا	ربما	نعم	نعم	نعم	نعم	نعم	نعم	لا	لا
أنثى	18-25 سنة	أعزب\عزباء	6000-12000 جنيه مصري	مدينة	جامعة بكالوريوس /دبلوم	جامعة بكالوريوس /دبلوم	جامعة بكالوريوس /دبلوم	طالب	نعم	لا	لا	لا	نعم	التلفاز	نعم	نعم	لا	نعم	نعم	لا	لا	لا	لا	لا	ربما	لا	ربما	لا	لا	لا	لا	لا	نعم	نعم	نعم	نعم	ربما	ربما	لا	لا
أنثى	18-25 سنة	أعزب\عزباء	أقل من 6000 جنيه مصري	مدينة	جامعة بكالوريوس /دبلوم	جامعة بكالوريوس /دبلوم	جامعة بكالوريوس /دبلوم	عامل	لا	لا	ليس لدي شريك	لا	نعم	الإنترنت, التلفاز, الأهل, الأصدقاء	لا	نعم	ربما	نعم	نعم	لا	لا	لا	لا	لا	نعم	لا	ربما	لا	ربما	ربما	لا	لا	نعم	نعم	نعم	نعم	ربما	ربما	لا	لا
أنثى	18-25 سنة	أعزب\عزباء	6000-12000 جنيه مصري	ريف	جامعة بكالوريوس /دبلوم	جامعة بكالوريوس /دبلوم	جامعة بكالوريوس /دبلوم	طالب	نعم	لا	لا	لا	نعم	الأهل, الصحف - الكتب - المجلات	نعم	نعم	نعم	ربما	نعم	لا	لا	لا	لا	لا	ربما	ربما	نعم	ربما	ربما	لا	ربما	ربما	نعم	نعم	نعم	نعم	ربما	ربما	لا	ربما
أنثى	18-25 سنة	أعزب\عزباء	أكثر من 12000 جنيه مصري	ريف	جامعة بكالوريوس /دبلوم	جامعة بكالوريوس /دبلوم	جامعة بكالوريوس /دبلوم	عامل	لا	لا	ليس لدي شريك	لا	نعم	أخرى	نعم	نعم	نعم	نعم	نعم	لا	لا	لا	لا	لا	لا	لا	ربما	لا	ربما	لا	لا	نعم	نعم	نعم	نعم	نعم	ربما	ربما	لا	لا
أنثى	18-25 سنة	أعزب\عزباء	أقل من 6000 جنيه مصري	مدينة	شهادات عليا	جامعة بكالوريوس /دبلوم	جامعة بكالوريوس /دبلوم	عامل	لا	لا	لا	لا	نعم	الإنترنت, التلفاز, المدرسة, الأهل, الصحف - الكتب - المجلات, الطبيب	نعم	لا	لا	ربما	نعم	لا	لا	لا	لا	لا	ربما	ربما	نعم	ربما	ربما	لا	لا	لا	نعم	نعم	نعم	نعم	نعم	نعم	لا	لا
أنثى	18-25 سنة	أعزب\عزباء	6000-12000 جنيه مصري	مدينة	جامعة بكالوريوس /دبلوم	جامعة بكالوريوس /دبلوم	شهادات عليا	عامل	نعم	لا	لا	لا	نعم	الإنترنت	نعم	نعم	نعم	ربما	ربما	لا	لا	لا	لا	لا	لا	لا	نعم	لا	لا	لا	لا	لا	نعم	نعم	نعم	نعم	ربما	ربما	لا	لا
أنثى	18-25 سنة	أعزب\عزباء	6000-12000 جنيه مصري	مدينة	جامعة بكالوريوس /دبلوم	جامعة بكالوريوس /دبلوم	جامعة بكالوريوس /دبلوم	عامل	لا	لا	ليس لدي شريك	لا	نعم	الإنترنت, التلفاز	نعم	نعم	نعم	ربما	نعم	لا	لا	لا	لا	لا	لا	لا	لا	لا	ربما	لا	لا	لا	نعم	نعم	نعم	نعم	نعم	نعم	لا	لا
أنثى	18-25 سنة	أعزب\عزباء	أقل من 6000 جنيه مصري	مدينة	جامعة بكالوريوس /دبلوم	جامعة بكالوريوس /دبلوم	جامعة بكالوريوس /دبلوم	طالب	نعم	لا	نعم	لا	نعم	الأهل	نعم	نعم	نعم	لا	نعم	لا	لا	لا	لا	لا	لا	لا	لا	لا	لا	لا	لا	ربما	نعم	نعم	نعم	نعم	ربما	ربما	لا	لا
أنثى	18-25 سنة	أعزب\عزباء	أكثر من 12000 جنيه مصري	مدينة	جامعة بكالوريوس /دبلوم	جامعة بكالوريوس /دبلوم	جامعة بكالوريوس /دبلوم	طالب	نعم	لا	ليس لدي شريك	لا	نعم	الأهل, الصحف - الكتب - المجلات	نعم	نعم	نعم	ربما	ربما	لا	لا	لا	لا	ربما	ربما	لا	ربما	لا	ربما	لا	لا	ربما	نعم	نعم	نعم	نعم	ربما	لا	لا	لا
أنثى	18-25 سنة	أعزب\عزباء	6000-12000 جنيه مصري	ريف	جامعة بكالوريوس /دبلوم	جامعة بكالوريوس /دبلوم	جامعة بكالوريوس /دبلوم	طالب	نعم	لا	لا	لا	نعم	الصحف - الكتب - المجلات	نعم	ربما	ربما	ربما	نعم	لا	لا	لا	لا	لا	لا	لا	ربما	لا	ربما	لا	لا	لا	نعم	نعم	نعم	نعم	نعم	ربما	لا	لا
أنثى	18-25 سنة	أعزب\عزباء	أقل من 6000 جنيه مصري	ريف	جامعة بكالوريوس /دبلوم	ابتدائي	ثانوي	طالب	نعم	لا	لا	لا	نعم	التلفاز	نعم	نعم	لا	نعم	نعم	لا	لا	لا	لا	لا	ربما	لا	لا	لا	لا	لا	لا	ربما	نعم	نعم	نعم	نعم	نعم	نعم	لا	لا
أنثى	18-25 سنة	أعزب\عزباء	6000-12000 جنيه مصري	ريف	جامعة بكالوريوس /دبلوم	جامعة بكالوريوس /دبلوم	جامعة بكالوريوس /دبلوم	طالب	نعم	لا	ليس لدي شريك	لا	نعم	الإنترنت, الصحف - الكتب - المجلات, الطبيب	نعم	نعم	لا	نعم	نعم	لا	لا	لا	لا	لا	لا	لا	لا	لا	لا	لا	لا	لا	نعم	نعم	نعم	نعم	نعم	نعم	لا	لا
أنثى	18-25 سنة	أعزب\عزباء	6000-12000 جنيه مصري	مدينة	جامعة بكالوريوس /دبلوم	جامعة بكالوريوس /دبلوم	جامعة بكالوريوس /دبلوم	طالب	نعم	لا	ليس لدي شريك	لا	نعم	الإنترنت, التلفاز, الصحف - الكتب - المجلات	نعم	لا	لا	ربما	نعم	لا	لا	لا	لا	لا	لا	لا	نعم	لا	ربما	لا	لا	ربما	نعم	نعم	نعم	نعم	نعم	نعم	لا	لا
أنثى	18-25 سنة	أعزب\عزباء	6000-12000 جنيه مصري	مدينة	جامعة بكالوريوس /دبلوم	جامعة بكالوريوس /دبلوم	جامعة بكالوريوس /دبلوم	طالب	نعم	لا	ليس لدي شريك	لا	نعم	الإنترنت, التلفاز, الأهل	نعم	نعم	نعم	نعم	نعم	لا	لا	لا	لا	لا	ربما	لا	ربما	ربما	نعم	لا	لا	ربما	نعم	نعم	نعم	نعم	ربما	ربما	لا	لا
أنثى	18-25 سنة	أعزب\عزباء	أكثر من 12000 جنيه مصري	ريف	جامعة بكالوريوس /دبلوم	جامعة بكالوريوس /دبلوم	جامعة بكالوريوس /دبلوم	طالب	نعم	لا	ليس لدي شريك	لا	نعم	الإنترنت, المدرسة, الأهل	نعم	لا	ربما	لا	نعم	لا	لا	لا	لا	لا	لا	لا	ربما	لا	ربما	لا	لا	نعم	نعم	نعم	ربما	نعم	نعم	نعم	لا	لا
أنثى	18-25 سنة	أعزب\عزباء	أقل من 6000 جنيه مصري	ريف	جامعة بكالوريوس /دبلوم	جامعة بكالوريوس /دبلوم	ثانوي	طالب	نعم	لا	لا	لا	نعم	التلفاز	نعم	نعم	لا	لا	نعم	لا	لا	لا	لا	لا	لا	لا	نعم	لا	لا	لا	لا	ربما	نعم	ربما	نعم	نعم	لا	ربما	ربما	ربما
أنثى	18-25 سنة	أعزب\عزباء	أقل من 6000 جنيه مصري	مدينة	جامعة بكالوريوس /دبلوم	جامعة بكالوريوس /دبلوم	ثانوي	عاطل عن العمل	لا	لا	ليس لدي شريك	لا	نعم	الإنترنت, الأهل, الصحف - الكتب - المجلات	نعم	نعم	نعم	ربما	نعم	لا	لا	لا	لا	لا	لا	لا	ربما	لا	ربما	لا	لا	نعم	نعم	نعم	نعم	ربما	ربما	ربما	ربما	لا
أنثى	18-25 سنة	أعزب\عزباء	6000-12000 جنيه مصري	ريف	جامعة بكالوريوس /دبلوم	جامعة بكالوريوس /دبلوم	جامعة بكالوريوس /دبلوم	طالب	نعم	لا	ليس لدي شريك	لا	نعم	الإنترنت, التلفاز, الصحف - الكتب - المجلات	نعم	نعم	ربما	ربما	نعم	لا	لا	لا	لا	لا	ربما	لا	ربما	لا	ربما	لا	لا	لا	نعم	نعم	نعم	نعم	نعم	نعم	لا	لا
أنثى	18-25 سنة	أعزب\عزباء	6000-12000 جنيه مصري	مدينة	جامعة بكالوريوس /دبلوم	جامعة بكالوريوس /دبلوم	جامعة بكالوريوس /دبلوم	طالب	نعم	لا	ليس لدي شريك	لا	نعم	الإنترنت, التلفاز, المدرسة, الأهل, الأصدقاء, الصحف - الكتب - المجلات, الطبيب, أخرى	نعم	نعم	نعم	ربما	نعم	لا	لا	لا	لا	لا	لا	لا	نعم	لا	لا	لا	لا	لا	نعم	نعم	نعم	نعم	نعم	نعم	لا	لا
أنثى	18-25 سنة	أعزب\عزباء	6000-12000 جنيه مصري	ريف	جامعة بكالوريوس /دبلوم	شهادات عليا	جامعة بكالوريوس /دبلوم	طالب	نعم	لا	ليس لدي شريك	لا	نعم	الطبيب	نعم	نعم	ربما	ربما	نعم	لا	لا	لا	لا	لا	لا	ربما	نعم	ربما	ربما	لا	ربما	ربما	نعم	نعم	نعم	نعم	نعم	ربما	لا	لا
أنثى	18-25 سنة	أعزب\عزباء	أكثر من 12000 جنيه مصري	مدينة	جامعة بكالوريوس /دبلوم	جامعة بكالوريوس /دبلوم	جامعة بكالوريوس /دبلوم	عاطل عن العمل	لا	لا	ليس لدي شريك	لا	نعم	الإنترنت, التلفاز, الأهل, الصحف - الكتب - المجلات	نعم	ربما	لا	نعم	نعم	لا	لا	لا	لا	لا	لا	لا	ربما	لا	لا	لا	لا	ربما	نعم	نعم	نعم	نعم	ربما	ربما	لا	لا
ذكر	18-25 سنة	أعزب\عزباء	أقل من 6000 جنيه مصري	ريف	جامعة بكالوريوس /دبلوم	ثانوي	ثانوي	طالب	نعم	لا	ليس لدي شريك	لا	لا	أخرى	نعم	نعم	نعم	ربما	نعم	نعم	ربما	نعم	لا	لا	لا	لا	ربما	لا	ربما	ربما	لا	لا	ربما	ربما	لا	لا	لا	لا	نعم	لا
أنثى	18-25 سنة	أعزب\عزباء	أكثر من 12000 جنيه مصري	ريف	جامعة بكالوريوس /دبلوم	جامعة بكالوريوس /دبلوم	جامعة بكالوريوس /دبلوم	طالب	نعم	لا	ليس لدي شريك	لا	لا	أخرى	نعم	ربما	نعم	ربما	ربما	نعم	ربما	نعم	نعم	ربما	ربما	ربما	ربما	ربما	ربما	ربما	ربما	ربما	نعم	نعم	نعم	نعم	لا	لا	ربما	نعم
أنثى	18-25 سنة	متزوج/ة	6000-12000 جنيه مصري	مدينة	جامعة بكالوريوس /دبلوم	جامعة بكالوريوس /دبلوم	جامعة بكالوريوس /دبلوم	طالب	نعم	لا	لا	لا	نعم	التلفاز	نعم	ربما	ربما	نعم	ربما	لا	لا	لا	لا	لا	ربما	لا	ربما	لا	لا	لا	لا	ربما	نعم	نعم	نعم	نعم	نعم	نعم	لا	لا
أنثى	51 سنة فأكثر	متزوج/ة	6000-12000 جنيه مصري	ريف	جامعة بكالوريوس /دبلوم	شهادات عليا	ثانوي	مربية منزل	لا	لا	لا	لا	نعم	الصحف - الكتب - المجلات	نعم	ربما	ربما	ربما	ربما	لا	لا	ربما	لا	لا	ربما	ربما	ربما	ربما	ربما	لا	ربما	ربما	نعم	نعم	نعم	نعم	نعم	ربما	ربما	لا
ذكر	51 سنة فأكثر	متزوج/ة	6000-12000 جنيه مصري	ريف	شهادات عليا	جامعة بكالوريوس /دبلوم	جامعة بكالوريوس /دبلوم	عامل	لا	لا	لا	لا	نعم	الصحف - الكتب - المجلات	نعم	ربما	ربما	ربما	ربما	لا	لا	لا	لا	لا	ربما	ربما	ربما	ربما	ربما	لا	ربما	ربما	نعم	نعم	نعم	نعم	ربما	ربما	ربما	لا
أنثى	18-25 سنة	أعزب\عزباء	أكثر من 12000 جنيه مصري	مدينة	جامعة بكالوريوس /دبلوم	جامعة بكالوريوس /دبلوم	جامعة بكالوريوس /دبلوم	طالب	نعم	لا	ليس لدي شريك	لا	نعم	الإنترنت, التلفاز, المدرسة, الأهل, الصحف - الكتب - المجلات	نعم	ربما	لا	ربما	نعم	لا	لا	لا	لا	لا	نعم	لا	نعم	لا	ربما	ربما	لا	لا	نعم	نعم	نعم	نعم	ربما	ربما	لا	لا
أنثى	18-25 سنة	أعزب\عزباء	أقل من 6000 جنيه مصري	مدينة	جامعة بكالوريوس /دبلوم	جامعة بكالوريوس /دبلوم	جامعة بكالوريوس /دبلوم	طالب	نعم	لا	لا	لا	نعم	الإنترنت	نعم	نعم	لا	نعم	نعم	لا	لا	لا	لا	لا	لا	لا	لا	لا	نعم	لا	لا	نعم	نعم	نعم	نعم	نعم	لا	ربما	لا	لا
أنثى	18-25 سنة	أعزب\عزباء	أكثر من 12000 جنيه مصري	مدينة	جامعة بكالوريوس /دبلوم	جامعة بكالوريوس /دبلوم	جامعة بكالوريوس /دبلوم	طالب	نعم	لا	لا	لا	نعم	الإنترنت, التلفاز, المدرسة, الأصدقاء	نعم	نعم	نعم	نعم	نعم	لا	لا	لا	لا	لا	لا	لا	نعم	لا	ربما	لا	لا	لا	نعم	نعم	نعم	نعم	ربما	نعم	لا	لا
أنثى	18-25 سنة	أعزب\عزباء	أكثر من 12000 جنيه مصري	مدينة	جامعة بكالوريوس /دبلوم	جامعة بكالوريوس /دبلوم	جامعة بكالوريوس /دبلوم	طالب	نعم	لا	ليس لدي شريك	لا	نعم	الإنترنت, التلفاز, الأهل	نعم	نعم	نعم	نعم	نعم	لا	لا	لا	لا	لا	نعم	ربما	نعم	لا	ربما	لا	لا	ربما	نعم	نعم	نعم	نعم	ربما	لا	لا	لا
أنثى	18-25 سنة	أعزب\عزباء	أكثر من 12000 جنيه مصري	مدينة	جامعة بكالوريوس /دبلوم	شهادات عليا	شهادات عليا	طالب	نعم	لا	ليس لدي شريك	لا	نعم	أخرى	نعم	ربما	لا	نعم	نعم	لا	لا	لا	لا	لا	لا	لا	لا	لا	ربما	لا	لا	ربما	نعم	نعم	نعم	نعم	نعم	نعم	لا	لا
أنثى	18-25 سنة	أعزب\عزباء	6000-12000 جنيه مصري	ريف	جامعة بكالوريوس /دبلوم	جامعة بكالوريوس /دبلوم	جامعة بكالوريوس /دبلوم	عامل	لا	لا	لا	لا	نعم	الإنترنت, التلفاز, الصحف - الكتب - المجلات	نعم	نعم	لا	نعم	نعم	لا	لا	لا	لا	لا	لا	لا	نعم	لا	لا	لا	لا	لا	نعم	نعم	نعم	نعم	نعم	نعم	لا	لا
أنثى	18-25 سنة	أعزب\عزباء	6000-12000 جنيه مصري	ريف	شهادات عليا	شهادات عليا	شهادات عليا	مربية منزل	نعم	لا	نعم	لا	نعم	الإنترنت	ربما	نعم	نعم	نعم	نعم	لا	لا	لا	لا	لا	نعم	لا	نعم	لا	نعم	لا	لا	لا	لا	نعم	نعم	نعم	لا	لا	لا	نعم
أنثى	18-25 سنة	أعزب\عزباء	6000-12000 جنيه مصري	مدينة	جامعة بكالوريوس /دبلوم	ثانوي	ثانوي	طالب	نعم	لا	ليس لدي شريك	لا	نعم	الأهل	نعم	نعم	لا	نعم	نعم	لا	لا	لا	لا	نعم	نعم	لا	لا	ربما	لا	لا	لا	نعم	ربما	نعم	نعم	نعم	لا	لا	لا	لا
أنثى	18-25 سنة	أعزب\عزباء	أقل من 6000 جنيه مصري	ريف	جامعة بكالوريوس /دبلوم	جامعة بكالوريوس /دبلوم	جامعة بكالوريوس /دبلوم	طالب	نعم	لا	لا	لا	نعم	الصحف - الكتب - المجلات	نعم	نعم	ربما	نعم	نعم	لا	لا	لا	لا	لا	لا	لا	لا	لا	نعم	لا	لا	نعم	نعم	نعم	نعم	نعم	نعم	نعم	لا	لا
أنثى	18-25 سنة	أعزب\عزباء	أكثر من 12000 جنيه مصري	مدينة	جامعة بكالوريوس /دبلوم	جامعة بكالوريوس /دبلوم	جامعة بكالوريوس /دبلوم	طالب	نعم	لا	ليس لدي شريك	لا	نعم	الإنترنت, المدرسة, الطبيب	نعم	نعم	ربما	نعم	نعم	لا	لا	لا	لا	لا	نعم	لا	نعم	لا	لا	لا	لا	ربما	نعم	نعم	نعم	نعم	لا	لا	لا	لا
أنثى	18-25 سنة	أعزب\عزباء	6000-12000 جنيه مصري	مدينة	جامعة بكالوريوس /دبلوم	جامعة بكالوريوس /دبلوم	ثانوي	مربية منزل	نعم	لا	ليس لدي شريك	لا	نعم	الإنترنت	نعم	نعم	نعم	ربما	نعم	لا	لا	لا	لا	لا	لا	لا	ربما	لا	ربما	لا	لا	لا	نعم	نعم	نعم	نعم	نعم	نعم	لا	لا
أنثى	18-25 سنة	أعزب\عزباء	أقل من 6000 جنيه مصري	ريف	جامعة بكالوريوس /دبلوم	جامعة بكالوريوس /دبلوم	جامعة بكالوريوس /دبلوم	عامل	نعم	لا	لا	لا	نعم	الأصدقاء	لا	لا	لا	لا	نعم	لا	لا	لا	نعم	لا	نعم	لا	نعم	لا	نعم	لا	لا	لا	نعم	نعم	نعم	نعم	نعم	نعم	لا	لا
أنثى	18-25 سنة	أعزب\عزباء	6000-12000 جنيه مصري	ريف	جامعة بكالوريوس /دبلوم	جامعة بكالوريوس /دبلوم	جامعة بكالوريوس /دبلوم	طالب	لا	لا	ليس لدي شريك	لا	نعم	الإنترنت, الأهل, الصحف - الكتب - المجلات, الطبيب	نعم	نعم	لا	نعم	نعم	لا	لا	ربما	لا	لا	ربما	لا	ربما	لا	ربما	لا	ربما	نعم	نعم	نعم	نعم	نعم	نعم	نعم	لا	لا
أنثى	18-25 سنة	أعزب\عزباء	6000-12000 جنيه مصري	مدينة	جامعة بكالوريوس /دبلوم	جامعة بكالوريوس /دبلوم	جامعة بكالوريوس /دبلوم	طالب	نعم	لا	ليس لدي شريك	لا	نعم	الإنترنت, التلفاز, الصحف - الكتب - المجلات, الطبيب	نعم	ربما	ربما	ربما	نعم	لا	لا	لا	لا	لا	ربما	لا	لا	لا	ربما	لا	لا	لا	نعم	نعم	نعم	نعم	لا	ربما	لا	لا
أنثى	18-25 سنة	أعزب\عزباء	أكثر من 12000 جنيه مصري	مدينة	جامعة بكالوريوس /دبلوم	جامعة بكالوريوس /دبلوم	شهادات عليا	طالب	نعم	لا	ليس لدي شريك	لا	لا	أخرى	ربما	ربما	ربما	ربما	ربما	ربما	ربما	ربما	ربما	ربما	ربما	ربما	ربما	ربما	ربما	ربما	ربما	ربما	ربما	ربما	ربما	ربما	ربما	ربما	ربما	ربما
أنثى	18-25 سنة	أعزب\عزباء	6000-12000 جنيه مصري	مدينة	جامعة بكالوريوس /دبلوم	جامعة بكالوريوس /دبلوم	جامعة بكالوريوس /دبلوم	طالب	نعم	لا	ليس لدي شريك	لا	نعم	الطبيب	نعم	نعم	نعم	نعم	نعم	لا	لا	ربما	لا	ربما	ربما	ربما	ربما	لا	لا	لا	لا	ربما	نعم	نعم	نعم	نعم	ربما	ربما	لا	لا
أنثى	18-25 سنة	أعزب\عزباء	أكثر من 12000 جنيه مصري	مدينة	جامعة بكالوريوس /دبلوم	شهادات عليا	جامعة بكالوريوس /دبلوم	طالب	نعم	لا	ليس لدي شريك	لا	نعم	الإنترنت, التلفاز, الصحف - الكتب - المجلات	نعم	نعم	نعم	نعم	نعم	لا	لا	لا	لا	لا	نعم	لا	نعم	لا	لا	لا	لا	نعم	نعم	نعم	نعم	نعم	ربما	ربما	لا	لا
أنثى	18-25 سنة	أعزب\عزباء	6000-12000 جنيه مصري	مدينة	جامعة بكالوريوس /دبلوم	جامعة بكالوريوس /دبلوم	جامعة بكالوريوس /دبلوم	طالب	نعم	نعم	ليس لدي شريك	لا	نعم	الأهل, الأصدقاء, الصحف - الكتب - المجلات	نعم	نعم	ربما	ربما	نعم	لا	لا	لا	لا	لا	لا	لا	ربما	لا	لا	لا	لا	لا	نعم	نعم	نعم	نعم	نعم	نعم	لا	لا
أنثى	18-25 سنة	أعزب\عزباء	6000-12000 جنيه مصري	مدينة	جامعة بكالوريوس /دبلوم	جامعة بكالوريوس /دبلوم	جامعة بكالوريوس /دبلوم	طالب	نعم	لا	ليس لدي شريك	لا	نعم	التلفاز, أخرى	نعم	نعم	نعم	لا	نعم	لا	لا	لا	لا	لا	لا	لا	ربما	لا	ربما	لا	لا	ربما	نعم	نعم	نعم	نعم	نعم	نعم	لا	لا
أنثى	18-25 سنة	أعزب\عزباء	أقل من 6000 جنيه مصري	مدينة	جامعة بكالوريوس /دبلوم	جامعة بكالوريوس /دبلوم	جامعة بكالوريوس /دبلوم	طالب	لا	لا	ليس لدي شريك	لا	نعم	الإنترنت	ربما	ربما	لا	نعم	نعم	لا	لا	ربما	لا	لا	لا	ربما	ربما	ربما	ربما	لا	لا	ربما	نعم	نعم	نعم	ربما	ربما	ربما	لا	ربما
أنثى	18-25 سنة	أعزب\عزباء	6000-12000 جنيه مصري	مدينة	جامعة بكالوريوس /دبلوم	ثانوي	ثانوي	طالب	نعم	لا	ليس لدي شريك	لا	نعم	الإنترنت, الأهل, الأصدقاء	نعم	ربما	لا	لا	ربما	لا	لا	لا	لا	لا	لا	لا	ربما	لا	ربما	لا	لا	لا	نعم	نعم	نعم	نعم	لا	لا	لا	لا
أنثى	18-25 سنة	أعزب\عزباء	6000-12000 جنيه مصري	ريف	جامعة بكالوريوس /دبلوم	ثانوي	ثانوي	طالب	نعم	لا	ليس لدي شريك	لا	نعم	الإنترنت, التلفاز, الأهل, الأصدقاء, الصحف - الكتب - المجلات	نعم	نعم	ربما	نعم	نعم	لا	لا	لا	لا	لا	نعم	لا	نعم	لا	لا	لا	لا	ربما	نعم	نعم	نعم	نعم	لا	ربما	لا	لا
أنثى	18-25 سنة	أعزب\عزباء	6000-12000 جنيه مصري	ريف	جامعة بكالوريوس /دبلوم	شهادات عليا	جامعة بكالوريوس /دبلوم	طالب	لا	لا	لا	لا	لا	الإنترنت	ربما	لا	لا	لا	لا	ربما	لا	لا	ربما	لا	ربما	ربما	لا	لا	لا	لا	لا	لا	لا	ربما	لا	لا	لا	لا	لا	لا
أنثى	18-25 سنة	أعزب\عزباء	6000-12000 جنيه مصري	ريف	جامعة بكالوريوس /دبلوم	جامعة بكالوريوس /دبلوم	جامعة بكالوريوس /دبلوم	طالب	نعم	لا	لا	لا	نعم	أخرى	ربما	ربما	ربما	لا	نعم	لا	لا	لا	لا	لا	لا	لا	ربما	لا	لا	لا	لا	ربما	نعم	نعم	نعم	نعم	لا	لا	ربما	لا
أنثى	18-25 سنة	أعزب\عزباء	6000-12000 جنيه مصري	ريف	جامعة بكالوريوس /دبلوم	ثانوي	جامعة بكالوريوس /دبلوم	طالب	نعم	نعم	ليس لدي شريك	لا	نعم	الأهل	نعم	ربما	ربما	لا	ربما	لا	لا	لا	لا	لا	لا	لا	لا	لا	نعم	لا	لا	ربما	نعم	نعم	نعم	نعم	نعم	نعم	لا	لا
أنثى	18-25 سنة	أعزب\عزباء	أقل من 6000 جنيه مصري	ريف	جامعة بكالوريوس /دبلوم	ابتدائي	ابتدائي	طالب	لا	لا	ليس لدي شريك	لا	نعم	الإنترنت, الأهل, الأصدقاء, الصحف - الكتب - المجلات	نعم	ربما	نعم	ربما	نعم	لا	لا	لا	لا	لا	لا	لا	لا	لا	لا	لا	لا	ربما	نعم	نعم	نعم	نعم	لا	لا	ربما	لا
أنثى	18-25 سنة	أعزب\عزباء	أقل من 6000 جنيه مصري	ريف	جامعة بكالوريوس /دبلوم	جامعة بكالوريوس /دبلوم	جامعة بكالوريوس /دبلوم	عامل	لا	لا	ليس لدي شريك	لا	نعم	الإنترنت, الأصدقاء, أخرى	ربما	ربما	لا	نعم	ربما	لا	لا	لا	لا	لا	ربما	ربما	ربما	ربما	ربما	ربما	ربما	ربما	نعم	نعم	نعم	نعم	ربما	ربما	لا	ربما
أنثى	18-25 سنة	أعزب\عزباء	أكثر من 12000 جنيه مصري	مدينة	جامعة بكالوريوس /دبلوم	جامعة بكالوريوس /دبلوم	جامعة بكالوريوس /دبلوم	طالب	لا	لا	ليس لدي شريك	لا	لا	الإنترنت	ربما	ربما	ربما	ربما	ربما	ربما	ربما	ربما	ربما	ربما	ربما	ربما	ربما	ربما	ربما	ربما	ربما	ربما	لا	لا	لا	لا	لا	لا	نعم	نعم
أنثى	18-25 سنة	أعزب\عزباء	6000-12000 جنيه مصري	مدينة	جامعة بكالوريوس /دبلوم	شهادات عليا	شهادات عليا	طالب	لا	لا	ليس لدي شريك	لا	نعم	الإنترنت, التلفاز, الصحف - الكتب - المجلات	نعم	نعم	لا	ربما	نعم	لا	لا	لا	لا	لا	ربما	لا	نعم	ربما	ربما	لا	لا	ربما	نعم	نعم	نعم	نعم	نعم	نعم	لا	لا
أنثى	18-25 سنة	أعزب\عزباء	أقل من 6000 جنيه مصري	مدينة	ثانوي	جامعة بكالوريوس /دبلوم	جامعة بكالوريوس /دبلوم	طالب	لا	لا	ليس لدي شريك	لا	نعم	الإنترنت, التلفاز	نعم	ربما	نعم	ربما	نعم	لا	لا	لا	لا	لا	لا	لا	ربما	لا	لا	لا	لا	نعم	نعم	نعم	نعم	نعم	ربما	ربما	لا	لا
أنثى	26-35 سنة	أعزب\عزباء	أكثر من 12000 جنيه مصري	مدينة	شهادات عليا	جامعة بكالوريوس /دبلوم	شهادات عليا	عامل	نعم	نعم	ليس لدي شريك	لا	نعم	الأهل	نعم	نعم	ربما	نعم	نعم	لا	لا	لا	لا	لا	نعم	لا	نعم	لا	ربما	لا	لا	نعم	نعم	نعم	نعم	نعم	نعم	نعم	لا	لا
أنثى	18-25 سنة	أعزب\عزباء	أكثر من 12000 جنيه مصري	مدينة	جامعة بكالوريوس /دبلوم	جامعة بكالوريوس /دبلوم	جامعة بكالوريوس /دبلوم	طالب	نعم	لا	ليس لدي شريك	لا	نعم	الإنترنت, المدرسة, الصحف - الكتب - المجلات, الطبيب	نعم	ربما	لا	لا	نعم	لا	لا	لا	لا	لا	لا	لا	لا	لا	لا	لا	لا	لا	نعم	نعم	نعم	نعم	نعم	ربما	لا	لا
أنثى	18-25 سنة	أعزب\عزباء	6000-12000 جنيه مصري	مدينة	شهادات عليا	جامعة بكالوريوس /دبلوم	جامعة بكالوريوس /دبلوم	عامل	لا	لا	لا	لا	نعم	الإنترنت, التلفاز, الأهل	نعم	نعم	لا	نعم	نعم	لا	لا	لا	لا	لا	ربما	لا	ربما	لا	لا	لا	لا	ربما	نعم	نعم	نعم	ربما	نعم	نعم	لا	لا
أنثى	18-25 سنة	أعزب\عزباء	6000-12000 جنيه مصري	مدينة	جامعة بكالوريوس /دبلوم	جامعة بكالوريوس /دبلوم	جامعة بكالوريوس /دبلوم	طالب	نعم	لا	ليس لدي شريك	لا	نعم	الإنترنت, الأهل, الأصدقاء, الصحف - الكتب - المجلات	نعم	ربما	ربما	نعم	نعم	لا	لا	لا	لا	لا	لا	لا	لا	لا	ربما	لا	لا	نعم	نعم	نعم	نعم	نعم	ربما	ربما	لا	لا
أنثى	18-25 سنة	أعزب\عزباء	6000-12000 جنيه مصري	مدينة	جامعة بكالوريوس /دبلوم	شهادات عليا	شهادات عليا	طالب	نعم	لا	ليس لدي شريك	لا	نعم	الأهل, الصحف - الكتب - المجلات	نعم	لا	ربما	ربما	نعم	لا	لا	لا	لا	لا	لا	لا	ربما	لا	لا	لا	لا	نعم	نعم	نعم	نعم	نعم	نعم	نعم	لا	لا
أنثى	18-25 سنة	أعزب\عزباء	أقل من 6000 جنيه مصري	مدينة	جامعة بكالوريوس /دبلوم	جامعة بكالوريوس /دبلوم	جامعة بكالوريوس /دبلوم	عامل	لا	لا	ليس لدي شريك	لا	نعم	الإنترنت, التلفاز, الأصدقاء	نعم	نعم	لا	نعم	نعم	لا	لا	لا	لا	لا	لا	لا	نعم	لا	ربما	لا	لا	ربما	نعم	نعم	نعم	نعم	ربما	ربما	لا	لا
أنثى	18-25 سنة	أعزب\عزباء	أكثر من 12000 جنيه مصري	ريف	جامعة بكالوريوس /دبلوم	جامعة بكالوريوس /دبلوم	ثانوي	طالب	نعم	لا	نعم	لا	نعم	الإنترنت, التلفاز, المدرسة, الأهل, الأصدقاء, الصحف - الكتب - المجلات, الطبيب, أخرى	نعم	نعم	ربما	نعم	نعم	لا	لا	لا	لا	لا	ربما	لا	ربما	لا	لا	لا	لا	نعم	نعم	نعم	نعم	نعم	نعم	نعم	لا	لا
أنثى	18-25 سنة	أعزب\عزباء	أقل من 6000 جنيه مصري	ريف	جامعة بكالوريوس /دبلوم	جامعة بكالوريوس /دبلوم	جامعة بكالوريوس /دبلوم	طالب	نعم	لا	ليس لدي شريك	لا	نعم	المدرسة, أخرى	نعم	ربما	لا	لا	نعم	لا	لا	لا	لا	لا	لا	لا	ربما	لا	ربما	لا	لا	ربما	نعم	نعم	نعم	نعم	ربما	ربما	لا	لا
أنثى	18-25 سنة	أعزب\عزباء	أقل من 6000 جنيه مصري	ريف	جامعة بكالوريوس /دبلوم	جامعة بكالوريوس /دبلوم	جامعة بكالوريوس /دبلوم	طالب	نعم	لا	ليس لدي شريك	لا	نعم	الإنترنت, الأهل	لا	لا	لا	لا	نعم	لا	لا	لا	لا	لا	لا	لا	نعم	لا	لا	لا	لا	ربما	نعم	نعم	نعم	نعم	نعم	نعم	لا	لا
ذكر	18-25 سنة	أعزب\عزباء	أكثر من 12000 جنيه مصري	ريف	جامعة بكالوريوس /دبلوم	جامعة بكالوريوس /دبلوم	جامعة بكالوريوس /دبلوم	طالب	نعم	لا	لا	لا	لا	الإنترنت, الأهل	نعم	نعم	لا	ربما	لا	لا	لا	نعم	لا	لا	لا	نعم	لا	لا	نعم	لا	لا	نعم	لا	لا	لا	نعم	نعم	نعم	لا	لا
أنثى	18-25 سنة	أعزب\عزباء	6000-12000 جنيه مصري	مدينة	جامعة بكالوريوس /دبلوم	جامعة بكالوريوس /دبلوم	جامعة بكالوريوس /دبلوم	طالب	نعم	لا	لا	لا	نعم	الأصدقاء	نعم	نعم	لا	نعم	نعم	لا	لا	نعم	لا	لا	نعم	لا	لا	لا	نعم	لا	لا	لا	لا	نعم	نعم	نعم	لا	لا	ربما	لا
أنثى	18-25 سنة	أعزب\عزباء	أكثر من 12000 جنيه مصري	مدينة	جامعة بكالوريوس /دبلوم	جامعة بكالوريوس /دبلوم	جامعة بكالوريوس /دبلوم	طالب	نعم	لا	ليس لدي شريك	لا	نعم	التلفاز	نعم	ربما	ربما	ربما	نعم	لا	لا	لا	لا	لا	ربما	ربما	ربما	ربما	ربما	لا	لا	نعم	نعم	نعم	نعم	نعم	نعم	نعم	لا	لا
أنثى	18-25 سنة	أعزب\عزباء	6000-12000 جنيه مصري	مدينة	جامعة بكالوريوس /دبلوم	جامعة بكالوريوس /دبلوم	جامعة بكالوريوس /دبلوم	عاطل عن العمل	لا	لا	لا	لا	نعم	الإنترنت, الأصدقاء, الصحف - الكتب - المجلات	نعم	نعم	ربما	ربما	نعم	لا	لا	لا	لا	لا	ربما	لا	ربما	لا	لا	لا	لا	لا	نعم	نعم	نعم	نعم	نعم	نعم	لا	لا
أنثى	26-35 سنة	أعزب\عزباء	أقل من 6000 جنيه مصري	ريف	شهادات عليا	جامعة بكالوريوس /دبلوم	جامعة بكالوريوس /دبلوم	عامل	نعم	لا	لا	لا	نعم	الإنترنت, الطبيب, أخرى	نعم	نعم	ربما	نعم	نعم	لا	لا	لا	لا	لا	لا	لا	لا	لا	ربما	لا	لا	ربما	نعم	نعم	نعم	نعم	ربما	ربما	لا	لا
أنثى	18-25 سنة	أعزب\عزباء	6000-12000 جنيه مصري	مدينة	جامعة بكالوريوس /دبلوم	ابتدائي	ثانوي	طالب	لا	لا	ليس لدي شريك	نعم	نعم	الإنترنت, التلفاز, الأهل, الصحف - الكتب - المجلات, أخرى	نعم	نعم	ربما	نعم	نعم	ربما	ربما	لا	لا	ربما	ربما	لا	ربما	ربما	ربما	لا	لا	ربما	نعم	نعم	نعم	ربما	ربما	ربما	لا	لا
أنثى	18-25 سنة	أعزب\عزباء	أقل من 6000 جنيه مصري	ريف	جامعة بكالوريوس /دبلوم	جامعة بكالوريوس /دبلوم	شهادات عليا	طالب	نعم	لا	ليس لدي شريك	لا	نعم	الإنترنت, التلفاز, المدرسة, الأهل, الأصدقاء, الصحف - الكتب - المجلات, الطبيب	نعم	نعم	نعم	لا	نعم	لا	لا	لا	لا	لا	نعم	لا	نعم	لا	نعم	ربما	لا	لا	نعم	نعم	نعم	نعم	نعم	نعم	لا	لا
ذكر	18-25 سنة	أعزب\عزباء	أقل من 6000 جنيه مصري	ريف	شهادات عليا	ثانوي	ابتدائي	طالب	لا	لا	ليس لدي شريك	لا	نعم	الأهل	نعم	نعم	نعم	ربما	نعم	ربما	ربما	ربما	ربما	ربما	ربما	ربما	ربما	ربما	لا	لا	لا	ربما	لا	لا	لا	لا	لا	لا	نعم	نعم
أنثى	18-25 سنة	أعزب\عزباء	أكثر من 12000 جنيه مصري	مدينة	جامعة بكالوريوس /دبلوم	جامعة بكالوريوس /دبلوم	جامعة بكالوريوس /دبلوم	طالب	نعم	لا	ليس لدي شريك	لا	نعم	الإنترنت, الأهل, الصحف - الكتب - المجلات	نعم	ربما	نعم	نعم	نعم	لا	ربما	ربما	لا	لا	ربما	لا	ربما	لا	ربما	لا	لا	لا	نعم	نعم	نعم	نعم	لا	لا	لا	لا
أنثى	18-25 سنة	أعزب\عزباء	6000-12000 جنيه مصري	ريف	جامعة بكالوريوس /دبلوم	ثانوي	جامعة بكالوريوس /دبلوم	طالب	لا	لا	لا	لا	نعم	الأهل	نعم	نعم	ربما	ربما	نعم	ربما	ربما	ربما	ربما	لا	نعم	ربما	لا	لا	ربما	لا	لا	نعم	نعم	نعم	نعم	نعم	لا	لا	لا	لا
أنثى	18-25 سنة	أعزب\عزباء	أقل من 6000 جنيه مصري	مدينة	ثانوي	جامعة بكالوريوس /دبلوم	جامعة بكالوريوس /دبلوم	طالب	نعم	لا	ليس لدي شريك	لا	نعم	الإنترنت	نعم	نعم	ربما	ربما	نعم	لا	لا	لا	لا	لا	ربما	لا	ربما	لا	لا	لا	لا	ربما	نعم	نعم	نعم	نعم	ربما	ربما	لا	لا
أنثى	18-25 سنة	أعزب\عزباء	6000-12000 جنيه مصري	مدينة	جامعة بكالوريوس /دبلوم	جامعة بكالوريوس /دبلوم	جامعة بكالوريوس /دبلوم	طالب	نعم	لا	لا	لا	نعم	الإنترنت	نعم	نعم	نعم	نعم	نعم	نعم	لا	نعم	لا	ربما	نعم	نعم	نعم	ربما	ربما	لا	لا	نعم	نعم	نعم	نعم	لا	لا	لا	نعم	ربما
أنثى	18-25 سنة	أعزب\عزباء	أقل من 6000 جنيه مصري	مدينة	جامعة بكالوريوس /دبلوم	جامعة بكالوريوس /دبلوم	جامعة بكالوريوس /دبلوم	طالب	نعم	لا	لا	لا	نعم	الإنترنت, الطبيب	نعم	نعم	ربما	ربما	نعم	لا	لا	لا	لا	لا	ربما	لا	نعم	لا	لا	لا	لا	نعم	نعم	نعم	نعم	نعم	ربما	ربما	لا	لا
ذكر	18-25 سنة	أعزب\عزباء	أكثر من 12000 جنيه مصري	ريف	جامعة بكالوريوس /دبلوم	شهادات عليا	جامعة بكالوريوس /دبلوم	طالب	لا	لا	ليس لدي شريك	لا	نعم	الأصدقاء	نعم	ربما	ربما	نعم	ربما	لا	ربما	ربما	ربما	ربما	ربما	ربما	ربما	ربما	ربما	ربما	ربما	ربما	نعم	نعم	نعم	نعم	لا	لا	ربما	لا
أنثى	18-25 سنة	أعزب\عزباء	6000-12000 جنيه مصري	مدينة	جامعة بكالوريوس /دبلوم	جامعة بكالوريوس /دبلوم	جامعة بكالوريوس /دبلوم	طالب	نعم	لا	لا	لا	نعم	التلفاز	نعم	نعم	نعم	نعم	ربما	لا	لا	لا	لا	لا	لا	لا	لا	لا	لا	لا	لا	لا	نعم	نعم	نعم	نعم	لا	نعم	لا	لا
أنثى	18-25 سنة	أعزب\عزباء	6000-12000 جنيه مصري	مدينة	ثانوي	شهادات عليا	جامعة بكالوريوس /دبلوم	طالب	نعم	لا	ليس لدي شريك	لا	نعم	الإنترنت, أخرى	نعم	نعم	لا	نعم	نعم	لا	لا	لا	لا	لا	ربما	لا	ربما	لا	ربما	لا	لا	نعم	نعم	نعم	نعم	نعم	نعم	نعم	لا	لا
أنثى	18-25 سنة	أعزب\عزباء	أقل من 6000 جنيه مصري	ريف	شهادات عليا	جامعة بكالوريوس /دبلوم	جامعة بكالوريوس /دبلوم	طالب	نعم	لا	ليس لدي شريك	لا	نعم	الأهل, الأصدقاء, الصحف - الكتب - المجلات	نعم	نعم	نعم	نعم	نعم	نعم	لا	لا	لا	نعم	نعم	لا	نعم	لا	نعم	لا	لا	نعم	نعم	نعم	نعم	نعم	ربما	ربما	ربما	ربما
أنثى	18-25 سنة	أعزب\عزباء	6000-12000 جنيه مصري	ريف	جامعة بكالوريوس /دبلوم	جامعة بكالوريوس /دبلوم	جامعة بكالوريوس /دبلوم	طالب	نعم	لا	ليس لدي شريك	لا	نعم	المدرسة	نعم	نعم	نعم	نعم	نعم	لا	لا	لا	لا	لا	لا	لا	لا	لا	ربما	لا	لا	نعم	نعم	نعم	نعم	نعم	ربما	ربما	لا	لا
أنثى	18-25 سنة	أعزب\عزباء	6000-12000 جنيه مصري	ريف	جامعة بكالوريوس /دبلوم	ثانوي	ثانوي	عامل	لا	لا	لا	لا	نعم	الأصدقاء	نعم	ربما	ربما	ربما	نعم	لا	لا	لا	لا	ربما	لا	لا	لا	لا	لا	ربما	لا	ربما	نعم	نعم	نعم	نعم	نعم	نعم	لا	لا
أنثى	18-25 سنة	أعزب\عزباء	6000-12000 جنيه مصري	ريف	جامعة بكالوريوس /دبلوم	جامعة بكالوريوس /دبلوم	جامعة بكالوريوس /دبلوم	طالب	نعم	لا	ليس لدي شريك	لا	نعم	الإنترنت, الأهل	نعم	نعم	لا	ربما	نعم	لا	لا	لا	لا	لا	لا	لا	ربما	لا	ربما	لا	لا	ربما	نعم	نعم	نعم	نعم	نعم	نعم	لا	لا
أنثى	18-25 سنة	أعزب\عزباء	أكثر من 12000 جنيه مصري	مدينة	جامعة بكالوريوس /دبلوم	شهادات عليا	شهادات عليا	طالب	نعم	لا	ليس لدي شريك	لا	نعم	الإنترنت, الصحف - الكتب - المجلات	نعم	نعم	نعم	نعم	نعم	لا	لا	لا	لا	لا	نعم	لا	ربما	لا	ربما	ربما	لا	نعم	نعم	نعم	نعم	نعم	نعم	نعم	لا	لا
أنثى	18-25 سنة	أعزب\عزباء	أقل من 6000 جنيه مصري	مدينة	جامعة بكالوريوس /دبلوم	جامعة بكالوريوس /دبلوم	جامعة بكالوريوس /دبلوم	طالب	نعم	لا	لا	لا	لا	الإنترنت	ربما	ربما	ربما	ربما	نعم	ربما	ربما	ربما	ربما	ربما	ربما	ربما	ربما	ربما	ربما	ربما	ربما	ربما	ربما	ربما	ربما	ربما	ربما	ربما	ربما	ربما
أنثى	18-25 سنة	أعزب\عزباء	6000-12000 جنيه مصري	ريف	جامعة بكالوريوس /دبلوم	جامعة بكالوريوس /دبلوم	جامعة بكالوريوس /دبلوم	طالب	نعم	لا	ليس لدي شريك	لا	نعم	الطبيب	نعم	نعم	ربما	ربما	نعم	لا	لا	لا	لا	لا	لا	لا	نعم	لا	ربما	لا	لا	ربما	نعم	نعم	نعم	نعم	ربما	ربما	لا	لا
أنثى	18-25 سنة	أعزب\عزباء	6000-12000 جنيه مصري	مدينة	جامعة بكالوريوس /دبلوم	شهادات عليا	شهادات عليا	طالب	نعم	لا	ليس لدي شريك	لا	نعم	الإنترنت	نعم	نعم	ربما	ربما	نعم	لا	لا	لا	لا	لا	لا	لا	ربما	لا	لا	لا	لا	ربما	نعم	نعم	نعم	نعم	ربما	ربما	لا	لا
أنثى	18-25 سنة	أعزب\عزباء	أكثر من 12000 جنيه مصري	مدينة	شهادات عليا	جامعة بكالوريوس /دبلوم	شهادات عليا	طالب	نعم	لا	ليس لدي شريك	لا	نعم	الإنترنت, الطبيب	نعم	ربما	نعم	ربما	ربما	لا	ربما	لا	ربما	لا	ربما	لا	ربما	ربما	ربما	ربما	ربما	لا	نعم	نعم	نعم	نعم	ربما	ربما	ربما	لا
أنثى	18-25 سنة	أعزب\عزباء	6000-12000 جنيه مصري	ريف	ثانوي	جامعة بكالوريوس /دبلوم	جامعة بكالوريوس /دبلوم	طالب	نعم	لا	لا	لا	نعم	الطبيب	نعم	نعم	نعم	نعم	نعم	لا	لا	لا	لا	ربما	لا	نعم	نعم	لا	لا	لا	نعم	لا	لا	لا	نعم	نعم	نعم	نعم	لا	لا
أنثى	18-25 سنة	أعزب\عزباء	أكثر من 12000 جنيه مصري	مدينة	جامعة بكالوريوس /دبلوم	شهادات عليا	شهادات عليا	طالب	نعم	لا	لا	لا	نعم	المدرسة	نعم	ربما	نعم	نعم	نعم	نعم	لا	نعم	لا	ربما	ربما	لا	لا	ربما	ربما	لا	ربما	ربما	لا	لا	لا	لا	لا	لا	نعم	ربما
أنثى	18-25 سنة	أعزب\عزباء	أقل من 6000 جنيه مصري	ريف	جامعة بكالوريوس /دبلوم	جامعة بكالوريوس /دبلوم	جامعة بكالوريوس /دبلوم	عاطل عن العمل	لا	لا	ليس لدي شريك	لا	نعم	الإنترنت	نعم	ربما	نعم	لا	لا	ربما	ربما	لا	لا	ربما	ربما	ربما	نعم	نعم	ربما	ربما	ربما	نعم	نعم	نعم	نعم	لا	لا	نعم	لا	لا
ذكر	18-25 سنة	أعزب\عزباء	أقل من 6000 جنيه مصري	ريف	جامعة بكالوريوس /دبلوم	شهادات عليا	ابتدائي	طالب	نعم	لا	ليس لدي شريك	لا	نعم	الطبيب, أخرى	نعم	نعم	نعم	ربما	نعم	ربما	لا	ربما	لا	لا	ربما	لا	لا	لا	ربما	لا	لا	ربما	نعم	نعم	نعم	نعم	ربما	ربما	لا	لا
أنثى	26-35 سنة	متزوج/ة	6000-12000 جنيه مصري	ريف	جامعة بكالوريوس /دبلوم	جامعة بكالوريوس /دبلوم	جامعة بكالوريوس /دبلوم	مربية منزل	نعم	لا	لا	لا	نعم	المدرسة, الأهل	نعم	ربما	ربما	ربما	نعم	لا	لا	لا	لا	لا	ربما	لا	ربما	ربما	ربما	ربما	لا	ربما	نعم	نعم	نعم	نعم	ربما	نعم	لا	لا
أنثى	18-25 سنة	أعزب\عزباء	أكثر من 12000 جنيه مصري	مدينة	جامعة بكالوريوس /دبلوم	جامعة بكالوريوس /دبلوم	جامعة بكالوريوس /دبلوم	طالب	نعم	لا	ليس لدي شريك	لا	نعم	الأهل	نعم	نعم	ربما	نعم	نعم	لا	لا	لا	لا	لا	ربما	لا	ربما	لا	ربما	لا	ربما	لا	نعم	نعم	نعم	نعم	ربما	ربما	لا	لا
أنثى	18-25 سنة	أعزب\عزباء	أكثر من 12000 جنيه مصري	مدينة	شهادات عليا	شهادات عليا	شهادات عليا	عامل	نعم	لا	لا	لا	نعم	الإنترنت	نعم	ربما	نعم	ربما	نعم	لا	لا	لا	لا	لا	ربما	لا	ربما	لا	لا	لا	لا	ربما	نعم	نعم	نعم	نعم	لا	ربما	لا	لا
أنثى	18-25 سنة	أعزب\عزباء	أكثر من 12000 جنيه مصري	ريف	ثانوي	جامعة بكالوريوس /دبلوم	جامعة بكالوريوس /دبلوم	طالب	لا	لا	ليس لدي شريك	لا	نعم	الأهل	نعم	ربما	لا	ربما	نعم	لا	لا	لا	لا	لا	لا	لا	لا	لا	نعم	لا	لا	ربما	نعم	نعم	نعم	نعم	ربما	ربما	لا	لا
أنثى	18-25 سنة	أعزب\عزباء	6000-12000 جنيه مصري	مدينة	جامعة بكالوريوس /دبلوم	جامعة بكالوريوس /دبلوم	جامعة بكالوريوس /دبلوم	عامل	لا	لا	لا	لا	نعم	التلفاز	ربما	ربما	لا	ربما	نعم	لا	لا	لا	لا	لا	ربما	لا	لا	لا	لا	ربما	لا	ربما	نعم	نعم	نعم	نعم	ربما	ربما	لا	لا
أنثى	18-25 سنة	أعزب\عزباء	6000-12000 جنيه مصري	ريف	جامعة بكالوريوس /دبلوم	جامعة بكالوريوس /دبلوم	جامعة بكالوريوس /دبلوم	طالب	نعم	لا	لا	لا	نعم	الإنترنت, الأهل, الأصدقاء, الصحف - الكتب - المجلات, الطبيب	نعم	لا	لا	لا	نعم	لا	لا	لا	لا	لا	لا	لا	لا	لا	لا	لا	لا	لا	نعم	نعم	نعم	نعم	نعم	نعم	لا	لا
أنثى	18-25 سنة	أعزب\عزباء	6000-12000 جنيه مصري	ريف	جامعة بكالوريوس /دبلوم	جامعة بكالوريوس /دبلوم	جامعة بكالوريوس /دبلوم	عامل	نعم	لا	لا	لا	نعم	الإنترنت	نعم	نعم	نعم	نعم	نعم	لا	لا	لا	لا	لا	نعم	لا	لا	لا	لا	لا	لا	نعم	نعم	نعم	نعم	نعم	نعم	لا	لا	لا
أنثى	18-25 سنة	أعزب\عزباء	أقل من 6000 جنيه مصري	ريف	جامعة بكالوريوس /دبلوم	جامعة بكالوريوس /دبلوم	جامعة بكالوريوس /دبلوم	طالب	نعم	لا	ليس لدي شريك	لا	نعم	الإنترنت	نعم	ربما	ربما	ربما	نعم	لا	لا	لا	لا	لا	لا	لا	ربما	لا	ربما	لا	ربما	ربما	نعم	نعم	نعم	نعم	ربما	نعم	ربما	ربما
أنثى	18-25 سنة	أعزب\عزباء	أقل من 6000 جنيه مصري	مدينة	جامعة بكالوريوس /دبلوم	شهادات عليا	شهادات عليا	طالب	نعم	لا	ليس لدي شريك	لا	نعم	الأهل	نعم	نعم	ربما	ربما	ربما	لا	لا	ربما	ربما	ربما	ربما	لا	ربما	ربما	ربما	ربما	ربما	ربما	ربما	نعم	نعم	ربما	لا	لا	لا	لا
أنثى	18-25 سنة	أعزب\عزباء	أكثر من 12000 جنيه مصري	مدينة	جامعة بكالوريوس /دبلوم	جامعة بكالوريوس /دبلوم	جامعة بكالوريوس /دبلوم	طالب	نعم	لا	ليس لدي شريك	لا	نعم	الإنترنت, التلفاز, الأهل, الصحف - الكتب - المجلات	نعم	نعم	ربما	ربما	نعم	لا	لا	لا	لا	لا	لا	لا	نعم	لا	لا	لا	لا	نعم	نعم	نعم	نعم	نعم	نعم	نعم	لا	لا
أنثى	18-25 سنة	أعزب\عزباء	6000-12000 جنيه مصري	ريف	جامعة بكالوريوس /دبلوم	جامعة بكالوريوس /دبلوم	جامعة بكالوريوس /دبلوم	طالب	نعم	لا	ليس لدي شريك	لا	نعم	الإنترنت	نعم	نعم	لا	لا	نعم	لا	لا	لا	لا	لا	لا	لا	ربما	لا	لا	لا	لا	ربما	نعم	نعم	نعم	نعم	ربما	ربما	لا	لا
أنثى	18-25 سنة	أعزب\عزباء	أكثر من 12000 جنيه مصري	ريف	جامعة بكالوريوس /دبلوم	شهادات عليا	جامعة بكالوريوس /دبلوم	طالب	نعم	لا	لا	لا	نعم	الإنترنت	نعم	ربما	لا	ربما	لا	لا	لا	لا	لا	لا	ربما	ربما	لا	ربما	ربما	لا	لا	لا	نعم	نعم	نعم	نعم	نعم	نعم	لا	لا
أنثى	18-25 سنة	أعزب\عزباء	6000-12000 جنيه مصري	مدينة	جامعة بكالوريوس /دبلوم	شهادات عليا	جامعة بكالوريوس /دبلوم	طالب	نعم	لا	ليس لدي شريك	لا	نعم	الإنترنت, التلفاز, الصحف - الكتب - المجلات	نعم	نعم	لا	ربما	نعم	لا	لا	لا	لا	لا	ربما	لا	نعم	لا	ربما	لا	لا	نعم	نعم	نعم	نعم	نعم	ربما	ربما	لا	لا
أنثى	18-25 سنة	أعزب\عزباء	6000-12000 جنيه مصري	مدينة	جامعة بكالوريوس /دبلوم	ثانوي	ابتدائي	طالب	نعم	لا	ليس لدي شريك	لا	نعم	الإنترنت, التلفاز, المدرسة, الأهل, الصحف - الكتب - المجلات	نعم	ربما	لا	ربما	نعم	لا	لا	لا	لا	لا	لا	لا	ربما	لا	ربما	لا	لا	ربما	نعم	نعم	نعم	نعم	ربما	ربما	لا	لا
ذكر	18-25 سنة	أعزب\عزباء	أقل من 6000 جنيه مصري	مدينة	جامعة بكالوريوس /دبلوم	شهادات عليا	جامعة بكالوريوس /دبلوم	طالب	نعم	لا	ليس لدي شريك	لا	نعم	الإنترنت, أخرى	ربما	ربما	لا	لا	ربما	لا	لا	لا	لا	لا	ربما	لا	لا	لا	ربما	لا	لا	ربما	نعم	نعم	نعم	نعم	ربما	ربما	لا	لا
ذكر	18-25 سنة	أعزب\عزباء	6000-12000 جنيه مصري	ريف	جامعة بكالوريوس /دبلوم	جامعة بكالوريوس /دبلوم	جامعة بكالوريوس /دبلوم	طالب	نعم	لا	لا	لا	لا	أخرى	لا	ربما	ربما	ربما	لا	ربما	ربما	ربما	ربما	نعم	نعم	ربما	ربما	ربما	ربما	ربما	ربما	ربما	لا	لا	ربما	ربما	ربما	ربما	ربما	لا
ذكر	18-25 سنة	أعزب\عزباء	6000-12000 جنيه مصري	مدينة	جامعة بكالوريوس /دبلوم	شهادات عليا	شهادات عليا	طالب	نعم	لا	ليس لدي شريك	لا	نعم	الإنترنت	لا	نعم	لا	نعم	نعم	لا	لا	لا	ربما	لا	لا	لا	نعم	لا	ربما	ربما	لا	ربما	نعم	نعم	نعم	نعم	نعم	نعم	لا	لا
أنثى	18-25 سنة	أعزب\عزباء	6000-12000 جنيه مصري	مدينة	شهادات عليا	شهادات عليا	شهادات عليا	طالب	نعم	لا	لا	لا	نعم	الإنترنت, التلفاز, الأهل, الصحف - الكتب - المجلات, الطبيب, أخرى	نعم	نعم	نعم	نعم	نعم	لا	لا	لا	لا	لا	لا	لا	ربما	لا	لا	لا	لا	لا	نعم	نعم	نعم	نعم	نعم	نعم	لا	لا
ذكر	18-25 سنة	أعزب\عزباء	6000-12000 جنيه مصري	ريف	جامعة بكالوريوس /دبلوم	ثانوي	ثانوي	طالب	نعم	لا	ليس لدي شريك	لا	نعم	الإنترنت, التلفاز, أخرى	نعم	نعم	لا	ربما	نعم	نعم	لا	نعم	لا	لا	ربما	ربما	ربما	ربما	ربما	ربما	لا	ربما	نعم	نعم	نعم	نعم	لا	لا	ربما	لا
أنثى	18-25 سنة	أعزب\عزباء	أكثر من 12000 جنيه مصري	مدينة	جامعة بكالوريوس /دبلوم	جامعة بكالوريوس /دبلوم	جامعة بكالوريوس /دبلوم	طالب	نعم	لا	ليس لدي شريك	لا	نعم	الإنترنت	نعم	نعم	ربما	ربما	نعم	لا	لا	لا	لا	لا	لا	لا	ربما	لا	لا	لا	لا	نعم	نعم	نعم	نعم	نعم	نعم	نعم	لا	لا
أنثى	18-25 سنة	أعزب\عزباء	6000-12000 جنيه مصري	مدينة	شهادات عليا	جامعة بكالوريوس /دبلوم	ثانوي	مربية منزل	نعم	لا	لا	لا	نعم	الأصدقاء	نعم	نعم	نعم	نعم	نعم	نعم	لا	لا	لا	لا	لا	لا	لا	لا	نعم	لا	لا	ربما	نعم	ربما	ربما	ربما	لا	لا	نعم	نعم
ذكر	18-25 سنة	أعزب\عزباء	6000-12000 جنيه مصري	ريف	جامعة بكالوريوس /دبلوم	جامعة بكالوريوس /دبلوم	جامعة بكالوريوس /دبلوم	طالب	نعم	لا	ليس لدي شريك	لا	نعم	الإنترنت, المدرسة, الأهل, الأصدقاء	نعم	ربما	ربما	ربما	نعم	لا	لا	ربما	ربما	ربما	ربما	نعم	ربما	ربما	ربما	ربما	لا	ربما	ربما	نعم	ربما	لا	لا	لا	لا	لا
أنثى	18-25 سنة	أعزب\عزباء	أقل من 6000 جنيه مصري	مدينة	جامعة بكالوريوس /دبلوم	شهادات عليا	شهادات عليا	عامل	نعم	لا	ليس لدي شريك	لا	لا	الإنترنت, التلفاز, المدرسة, الأهل	نعم	ربما	نعم	ربما	نعم	لا	لا	لا	لا	لا	ربما	لا	ربما	لا	ربما	لا	لا	لا	نعم	نعم	نعم	ربما	لا	لا	لا	لا
ذكر	18-25 سنة	أعزب\عزباء	6000-12000 جنيه مصري	ريف	جامعة بكالوريوس /دبلوم	جامعة بكالوريوس /دبلوم	جامعة بكالوريوس /دبلوم	طالب	نعم	لا	لا	لا	نعم	الأصدقاء	نعم	ربما	نعم	لا	نعم	لا	لا	لا	لا	لا	ربما	لا	ربما	لا	لا	لا	لا	ربما	ربما	نعم	نعم	لا	لا	نعم	لا	لا
أنثى	18-25 سنة	أعزب\عزباء	أكثر من 12000 جنيه مصري	مدينة	جامعة بكالوريوس /دبلوم	جامعة بكالوريوس /دبلوم	جامعة بكالوريوس /دبلوم	طالب	نعم	لا	ليس لدي شريك	لا	نعم	الطبيب	ربما	نعم	نعم	ربما	نعم	لا	لا	ربما	لا	ربما	لا	ربما	لا	ربما	ربما	لا	لا	ربما	ربما	ربما	ربما	لا	لا	لا	ربما	نعم
أنثى	18-25 سنة	أعزب\عزباء	6000-12000 جنيه مصري	ريف	جامعة بكالوريوس /دبلوم	جامعة بكالوريوس /دبلوم	ثانوي	طالب	نعم	لا	ليس لدي شريك	لا	نعم	الإنترنت	نعم	نعم	ربما	نعم	نعم	نعم	نعم	نعم	نعم	نعم	نعم	لا	لا	لا	لا	لا	لا	ربما	ربما	ربما	ربما	ربما	ربما	ربما	لا	لا
ذكر	18-25 سنة	أعزب\عزباء	6000-12000 جنيه مصري	ريف	جامعة بكالوريوس /دبلوم	جامعة بكالوريوس /دبلوم	جامعة بكالوريوس /دبلوم	طالب	نعم	لا	ليس لدي شريك	لا	نعم	الإنترنت, التلفاز, المدرسة, الأهل, الصحف - الكتب - المجلات	نعم	نعم	نعم	ربما	نعم	لا	ربما	ربما	لا	ربما	نعم	نعم	لا	ربما	ربما	لا	ربما	نعم	نعم	نعم	نعم	لا	لا	لا	نعم	لا
أنثى	18-25 سنة	أعزب\عزباء	أقل من 6000 جنيه مصري	ريف	جامعة بكالوريوس /دبلوم	شهادات عليا	ثانوي	طالب	نعم	لا	ليس لدي شريك	لا	لا	أخرى	نعم	ربما	نعم	ربما	نعم	ربما	لا	لا	لا	لا	ربما	لا	نعم	لا	لا	لا	لا	ربما	نعم	نعم	نعم	لا	لا	لا	نعم	لا
ذكر	18-25 سنة	أعزب\عزباء	أقل من 6000 جنيه مصري	مدينة	ثانوي	ابتدائي	ابتدائي	عاطل عن العمل	لا	لا	ليس لدي شريك	لا	نعم	الإنترنت	نعم	ربما	نعم	ربما	نعم	لا	ربما	نعم	نعم	ربما	ربما	ربما	ربما	ربما	ربما	لا	لا	لا	نعم	لا	لا	لا	لا	لا	لا	لا
ذكر	18-25 سنة	أعزب\عزباء	أقل من 6000 جنيه مصري	ريف	ثانوي	جامعة بكالوريوس /دبلوم	ثانوي	طالب	لا	لا	ليس لدي شريك	لا	لا	الأصدقاء	نعم	نعم	لا	لا	نعم	لا	ربما	لا	لا	لا	ربما	لا	لا	لا	لا	لا	لا	ربما	نعم	نعم	نعم	نعم	ربما	ربما	ربما	لا
أنثى	18-25 سنة	أعزب\عزباء	أقل من 6000 جنيه مصري	مدينة	ثانوي	جامعة بكالوريوس /دبلوم	جامعة بكالوريوس /دبلوم	طالب	لا	لا	ليس لدي شريك	لا	نعم	الإنترنت, الصحف - الكتب - المجلات, أخرى	ربما	ربما	ربما	ربما	نعم	لا	ربما	لا	لا	ربما	ربما	ربما	ربما	ربما	ربما	ربما	لا	لا	نعم	نعم	نعم	نعم	نعم	نعم	لا	لا
أنثى	18-25 سنة	أعزب\عزباء	6000-12000 جنيه مصري	ريف	شهادات عليا	شهادات عليا	شهادات عليا	طالب	نعم	لا	ليس لدي شريك	لا	نعم	الصحف - الكتب - المجلات, الطبيب	نعم	نعم	لا	نعم	نعم	لا	لا	لا	لا	لا	ربما	لا	لا	لا	لا	لا	لا	ربما	نعم	نعم	نعم	نعم	نعم	نعم	لا	لا
ذكر	18-25 سنة	أعزب\عزباء	6000-12000 جنيه مصري	مدينة	شهادات عليا	شهادات عليا	شهادات عليا	طالب	نعم	لا	ليس لدي شريك	لا	نعم	المدرسة	نعم	نعم	لا	نعم	نعم	لا	لا	لا	لا	لا	لا	لا	نعم	لا	لا	لا	لا	لا	نعم	نعم	نعم	نعم	نعم	نعم	لا	لا
ذكر	18-25 سنة	أعزب\عزباء	أقل من 6000 جنيه مصري	ريف	ثانوي	شهادات عليا	شهادات عليا	متقاعد	لا	لا	ليس لدي شريك	لا	نعم	الأهل	نعم	نعم	نعم	نعم	نعم	لا	لا	لا	لا	لا	نعم	لا	لا	نعم	لا	لا	لا	نعم	نعم	نعم	نعم	نعم	ربما	ربما	ربما	ربما
أنثى	18-25 سنة	أعزب\عزباء	أقل من 6000 جنيه مصري	ريف	جامعة بكالوريوس /دبلوم	جامعة بكالوريوس /دبلوم	جامعة بكالوريوس /دبلوم	متقاعد	نعم	لا	لا	لا	نعم	المدرسة	نعم	نعم	لا	نعم	نعم	لا	لا	لا	لا	لا	لا	لا	لا	لا	نعم	لا	لا	لا	نعم	نعم	نعم	نعم	ربما	لا	لا	لا
أنثى	18-25 سنة	أعزب\عزباء	6000-12000 جنيه مصري	ريف	جامعة بكالوريوس /دبلوم	جامعة بكالوريوس /دبلوم	جامعة بكالوريوس /دبلوم	طالب	لا	لا	ليس لدي شريك	لا	نعم	الإنترنت, الصحف - الكتب - المجلات	نعم	نعم	لا	لا	نعم	لا	لا	لا	لا	لا	لا	لا	ربما	لا	لا	لا	لا	نعم	نعم	نعم	نعم	نعم	نعم	نعم	لا	لا
أنثى	18-25 سنة	أعزب\عزباء	أكثر من 12000 جنيه مصري	ريف	ثانوي	جامعة بكالوريوس /دبلوم	شهادات عليا	طالب	لا	لا	ليس لدي شريك	لا	نعم	الإنترنت, التلفاز, الصحف - الكتب - المجلات, الطبيب, أخرى	نعم	لا	نعم	نعم	نعم	لا	لا	لا	لا	لا	لا	لا	ربما	لا	ربما	لا	لا	ربما	نعم	نعم	نعم	نعم	ربما	ربما	لا	لا
أنثى	18-25 سنة	أعزب\عزباء	أقل من 6000 جنيه مصري	مدينة	ثانوي	شهادات عليا	شهادات عليا	طالب	لا	لا	نعم	لا	لا	الإنترنت, التلفاز, المدرسة, الأهل, الأصدقاء, الطبيب	نعم	نعم	نعم	نعم	نعم	لا	لا	لا	لا	لا	ربما	لا	لا	لا	ربما	ربما	لا	لا	نعم	نعم	نعم	نعم	نعم	نعم	لا	لا
أنثى	18-25 سنة	أعزب\عزباء	أقل من 6000 جنيه مصري	مدينة	جامعة بكالوريوس /دبلوم	جامعة بكالوريوس /دبلوم	جامعة بكالوريوس /دبلوم	عامل	نعم	لا	ليس لدي شريك	لا	نعم	التلفاز	ربما	نعم	ربما	ربما	نعم	لا	لا	لا	لا	لا	لا	لا	لا	لا	لا	لا	لا	لا	نعم	نعم	نعم	نعم	ربما	ربما	لا	لا
أنثى	18-25 سنة	أعزب\عزباء	6000-12000 جنيه مصري	ريف	ثانوي	جامعة بكالوريوس /دبلوم	جامعة بكالوريوس /دبلوم	عامل	لا	لا	ليس لدي شريك	لا	نعم	أخرى	نعم	ربما	ربما	نعم	نعم	لا	لا	ربما	لا	لا	ربما	لا	ربما	لا	لا	لا	لا	ربما	نعم	نعم	نعم	نعم	ربما	لا	ربما	لا
أنثى	18-25 سنة	أعزب\عزباء	أقل من 6000 جنيه مصري	مدينة	جامعة بكالوريوس /دبلوم	جامعة بكالوريوس /دبلوم	شهادات عليا	طالب	لا	لا	ليس لدي شريك	لا	نعم	الإنترنت	نعم	نعم	ربما	لا	نعم	لا	لا	لا	لا	لا	نعم	لا	لا	لا	لا	لا	لا	ربما	نعم	نعم	نعم	نعم	نعم	نعم	لا	لا
أنثى	18-25 سنة	أعزب\عزباء	أقل من 6000 جنيه مصري	مدينة	ثانوي	جامعة بكالوريوس /دبلوم	جامعة بكالوريوس /دبلوم	طالب	لا	نعم	ليس لدي شريك	لا	نعم	الطبيب	نعم	نعم	ربما	لا	نعم	لا	لا	لا	لا	لا	لا	لا	لا	لا	لا	لا	لا	نعم	نعم	نعم	نعم	نعم	ربما	ربما	ربما	لا
أنثى	18-25 سنة	أعزب\عزباء	6000-12000 جنيه مصري	مدينة	جامعة بكالوريوس /دبلوم	شهادات عليا	شهادات عليا	طالب	نعم	لا	ليس لدي شريك	لا	نعم	الأصدقاء	نعم	ربما	ربما	ربما	نعم	لا	لا	ربما	ربما	لا	ربما	ربما	نعم	لا	ربما	لا	لا	نعم	ربما	نعم	نعم	ربما	لا	لا	نعم	ربما
أنثى	18-25 سنة	أعزب\عزباء	أقل من 6000 جنيه مصري	ريف	جامعة بكالوريوس /دبلوم	ابتدائي	ابتدائي	عاطل عن العمل	لا	لا	ليس لدي شريك	لا	نعم	الأصدقاء	نعم	نعم	نعم	ربما	نعم	لا	لا	لا	لا	لا	ربما	ربما	لا	ربما	ربما	لا	لا	ربما	نعم	نعم	نعم	نعم	ربما	ربما	لا	لا
أنثى	18-25 سنة	أعزب\عزباء	6000-12000 جنيه مصري	مدينة	جامعة بكالوريوس /دبلوم	جامعة بكالوريوس /دبلوم	جامعة بكالوريوس /دبلوم	طالب	نعم	لا	لا	لا	نعم	الإنترنت, التلفاز, المدرسة, الصحف - الكتب - المجلات, الطبيب, أخرى	نعم	نعم	ربما	ربما	نعم	لا	لا	لا	لا	لا	نعم	لا	ربما	لا	لا	لا	لا	لا	نعم	نعم	نعم	نعم	نعم	نعم	لا	لا
أنثى	18-25 سنة	أعزب\عزباء	أقل من 6000 جنيه مصري	مدينة	جامعة بكالوريوس /دبلوم	جامعة بكالوريوس /دبلوم	جامعة بكالوريوس /دبلوم	عامل	نعم	نعم	ليس لدي شريك	لا	نعم	المدرسة	نعم	نعم	نعم	لا	نعم	لا	لا	لا	لا	لا	لا	لا	لا	لا	لا	لا	لا	نعم	نعم	نعم	نعم	نعم	نعم	نعم	لا	لا
أنثى	18-25 سنة	أعزب\عزباء	6000-12000 جنيه مصري	ريف	جامعة بكالوريوس /دبلوم	جامعة بكالوريوس /دبلوم	ثانوي	طالب	لا	لا	نعم	لا	نعم	الأصدقاء	نعم	نعم	لا	ربما	نعم	لا	لا	لا	لا	لا	لا	لا	نعم	لا	لا	ربما	لا	نعم	نعم	نعم	نعم	نعم	نعم	نعم	لا	لا
أنثى	18-25 سنة	أعزب\عزباء	أكثر من 12000 جنيه مصري	مدينة	جامعة بكالوريوس /دبلوم	جامعة بكالوريوس /دبلوم	جامعة بكالوريوس /دبلوم	طالب	نعم	لا	ليس لدي شريك	لا	نعم	أخرى	نعم	نعم	نعم	لا	نعم	لا	لا	لا	لا	لا	لا	لا	نعم	لا	ربما	لا	لا	لا	نعم	نعم	نعم	نعم	لا	لا	لا	لا
أنثى	18-25 سنة	أعزب\عزباء	6000-12000 جنيه مصري	ريف	جامعة بكالوريوس /دبلوم	جامعة بكالوريوس /دبلوم	ابتدائي	عاطل عن العمل	لا	لا	ليس لدي شريك	لا	نعم	الإنترنت	نعم	ربما	نعم	لا	نعم	لا	لا	لا	لا	ربما	ربما	لا	ربما	لا	لا	لا	لا	ربما	نعم	نعم	نعم	نعم	نعم	نعم	لا	لا
أنثى	18-25 سنة	أعزب\عزباء	6000-12000 جنيه مصري	مدينة	جامعة بكالوريوس /دبلوم	شهادات عليا	شهادات عليا	طالب	نعم	لا	ليس لدي شريك	لا	نعم	أخرى	نعم	ربما	نعم	لا	نعم	لا	لا	لا	لا	لا	ربما	لا	ربما	لا	لا	لا	لا	لا	نعم	نعم	نعم	ربما	ربما	ربما	ربما	لا
أنثى	18-25 سنة	أعزب\عزباء	أقل من 6000 جنيه مصري	مدينة	جامعة بكالوريوس /دبلوم	جامعة بكالوريوس /دبلوم	جامعة بكالوريوس /دبلوم	طالب	نعم	لا	ليس لدي شريك	لا	نعم	الإنترنت, الطبيب	نعم	نعم	ربما	ربما	ربما	لا	لا	لا	لا	لا	ربما	لا	لا	لا	ربما	لا	ربما	ربما	نعم	نعم	نعم	نعم	ربما	ربما	ربما	لا
أنثى	18-25 سنة	أعزب\عزباء	أقل من 6000 جنيه مصري	ريف	جامعة بكالوريوس /دبلوم	جامعة بكالوريوس /دبلوم	ثانوي	طالب	نعم	لا	لا	لا	نعم	الإنترنت, التلفاز, الأهل, الأصدقاء, الصحف - الكتب - المجلات	نعم	لا	ربما	لا	نعم	لا	لا	لا	لا	لا	لا	لا	لا	لا	لا	لا	لا	ربما	نعم	نعم	نعم	نعم	نعم	نعم	لا	لا
أنثى	18-25 سنة	أعزب\عزباء	6000-12000 جنيه مصري	ريف	جامعة بكالوريوس /دبلوم	جامعة بكالوريوس /دبلوم	جامعة بكالوريوس /دبلوم	عامل	نعم	لا	لا	لا	نعم	الإنترنت, التلفاز, المدرسة, الأهل, الأصدقاء	نعم	لا	ربما	لا	نعم	لا	لا	لا	لا	ربما	ربما	لا	نعم	ربما	لا	لا	لا	نعم	نعم	نعم	نعم	نعم	لا	لا	لا	لا
أنثى	18-25 سنة	أعزب\عزباء	6000-12000 جنيه مصري	ريف	جامعة بكالوريوس /دبلوم	شهادات عليا	شهادات عليا	طالب	لا	لا	ليس لدي شريك	لا	نعم	الإنترنت	نعم	ربما	ربما	لا	نعم	لا	لا	لا	لا	لا	ربما	لا	ربما	لا	ربما	لا	لا	لا	نعم	نعم	نعم	نعم	نعم	نعم	لا	لا
أنثى	18-25 سنة	أعزب\عزباء	6000-12000 جنيه مصري	ريف	جامعة بكالوريوس /دبلوم	جامعة بكالوريوس /دبلوم	جامعة بكالوريوس /دبلوم	طالب	نعم	لا	لا	لا	نعم	الإنترنت, الصحف - الكتب - المجلات	نعم	نعم	نعم	نعم	نعم	لا	لا	لا	لا	لا	لا	لا	ربما	لا	لا	لا	لا	نعم	نعم	نعم	نعم	نعم	نعم	نعم	لا	لا
أنثى	18-25 سنة	أعزب\عزباء	6000-12000 جنيه مصري	مدينة	ثانوي	شهادات عليا	شهادات عليا	طالب	لا	نعم	ليس لدي شريك	لا	نعم	الأهل	نعم	نعم	لا	نعم	نعم	لا	لا	لا	لا	لا	لا	لا	نعم	لا	لا	لا	لا	نعم	نعم	نعم	نعم	نعم	لا	لا	لا	لا
أنثى	18-25 سنة	أعزب\عزباء	أكثر من 12000 جنيه مصري	مدينة	جامعة بكالوريوس /دبلوم	جامعة بكالوريوس /دبلوم	جامعة بكالوريوس /دبلوم	طالب	نعم	لا	ليس لدي شريك	لا	نعم	الإنترنت, الأهل	نعم	نعم	لا	ربما	نعم	لا	لا	لا	لا	لا	ربما	لا	لا	لا	لا	ربما	لا	لا	نعم	نعم	نعم	نعم	نعم	ربما	لا	لا
أنثى	18-25 سنة	متزوج/ة	أكثر من 12000 جنيه مصري	مدينة	شهادات عليا	شهادات عليا	شهادات عليا	طالب	نعم	لا	لا	لا	نعم	الطبيب	نعم	ربما	ربما	لا	ربما	لا	لا	لا	لا	لا	ربما	ربما	لا	لا	ربما	لا	ربما	لا	نعم	نعم	نعم	نعم	نعم	نعم	لا	لا
أنثى	26-35 سنة	متزوج/ة	أقل من 6000 جنيه مصري	ريف	شهادات عليا	جامعة بكالوريوس /دبلوم	جامعة بكالوريوس /دبلوم	عامل	لا	لا	لا	لا	لا	الإنترنت	نعم	نعم	نعم	لا	نعم	لا	لا	لا	لا	لا	لا	لا	لا	لا	لا	لا	لا	نعم	نعم	نعم	نعم	نعم	لا	لا	لا	لا
أنثى	18-25 سنة	أعزب\عزباء	6000-12000 جنيه مصري	مدينة	ثانوي	جامعة بكالوريوس /دبلوم	جامعة بكالوريوس /دبلوم	طالب	لا	لا	لا	لا	نعم	الإنترنت	نعم	ربما	لا	لا	نعم	لا	لا	ربما	لا	ربما	نعم	لا	لا	ربما	لا	لا	لا	ربما	نعم	نعم	نعم	نعم	ربما	نعم	لا	لا
أنثى	18-25 سنة	أعزب\عزباء	أقل من 6000 جنيه مصري	ريف	جامعة بكالوريوس /دبلوم	جامعة بكالوريوس /دبلوم	جامعة بكالوريوس /دبلوم	طالب	نعم	لا	ليس لدي شريك	لا	نعم	الأهل	نعم	نعم	ربما	نعم	نعم	لا	لا	لا	لا	لا	نعم	لا	لا	لا	لا	ربما	لا	لا	نعم	نعم	نعم	نعم	لا	لا	ربما	لا
أنثى	18-25 سنة	أعزب\عزباء	6000-12000 جنيه مصري	مدينة	جامعة بكالوريوس /دبلوم	جامعة بكالوريوس /دبلوم	جامعة بكالوريوس /دبلوم	طالب	نعم	لا	لا	لا	نعم	التلفاز	نعم	لا	لا	لا	نعم	لا	لا	لا	لا	لا	لا	لا	لا	لا	لا	لا	لا	لا	نعم	نعم	نعم	نعم	نعم	نعم	لا	لا
أنثى	36-50 سنة	متزوج/ة	6000-12000 جنيه مصري	ريف	ثانوي	جامعة بكالوريوس /دبلوم	ابتدائي	مربية منزل	لا	لا	لا	لا	نعم	الأهل	نعم	نعم	لا	لا	نعم	لا	لا	لا	لا	لا	لا	لا	ربما	لا	لا	ربما	لا	نعم	نعم	نعم	نعم	نعم	نعم	نعم	لا	لا
أنثى	18-25 سنة	أعزب\عزباء	أقل من 6000 جنيه مصري	مدينة	جامعة بكالوريوس /دبلوم	جامعة بكالوريوس /دبلوم	جامعة بكالوريوس /دبلوم	طالب	نعم	لا	ليس لدي شريك	لا	نعم	الإنترنت	لا	لا	لا	لا	نعم	لا	لا	لا	لا	لا	لا	لا	ربما	لا	لا	لا	لا	ربما	نعم	نعم	نعم	نعم	ربما	نعم	لا	لا
أنثى	18-25 سنة	أعزب\عزباء	أقل من 6000 جنيه مصري	ريف	جامعة بكالوريوس /دبلوم	ابتدائي	ابتدائي	عاطل عن العمل	لا	لا	لا	لا	نعم	التلفاز	نعم	نعم	لا	نعم	نعم	لا	لا	لا	لا	لا	لا	لا	نعم	لا	لا	لا	لا	ربما	نعم	نعم	نعم	نعم	ربما	نعم	لا	لا
ذكر	18-25 سنة	أعزب\عزباء	أقل من 6000 جنيه مصري	مدينة	جامعة بكالوريوس /دبلوم	جامعة بكالوريوس /دبلوم	جامعة بكالوريوس /دبلوم	طالب	نعم	لا	ليس لدي شريك	لا	نعم	الإنترنت, الأصدقاء, الطبيب	نعم	نعم	لا	نعم	نعم	لا	لا	لا	لا	لا	لا	لا	نعم	لا	نعم	لا	لا	ربما	نعم	نعم	نعم	ربما	ربما	ربما	لا	لا
ذكر	18-25 سنة	أعزب\عزباء	6000-12000 جنيه مصري	مدينة	جامعة بكالوريوس /دبلوم	شهادات عليا	جامعة بكالوريوس /دبلوم	طالب	نعم	لا	ليس لدي شريك	لا	نعم	أخرى	نعم	نعم	ربما	نعم	نعم	لا	لا	لا	لا	لا	لا	لا	نعم	ربما	ربما	لا	ربما	ربما	نعم	نعم	نعم	نعم	نعم	نعم	لا	لا
أنثى	18-25 سنة	أعزب\عزباء	6000-12000 جنيه مصري	مدينة	جامعة بكالوريوس /دبلوم	جامعة بكالوريوس /دبلوم	ثانوي	طالب	نعم	لا	ليس لدي شريك	لا	نعم	التلفاز	نعم	ربما	ربما	ربما	نعم	ربما	لا	ربما	ربما	ربما	ربما	ربما	ربما	ربما	ربما	لا	ربما	نعم	ربما	ربما	نعم	ربما	لا	لا	ربما	لا
أنثى	18-25 سنة	أعزب\عزباء	أقل من 6000 جنيه مصري	ريف	جامعة بكالوريوس /دبلوم	جامعة بكالوريوس /دبلوم	ابتدائي	عاطل عن العمل	لا	لا	ليس لدي شريك	لا	نعم	الإنترنت	ربما	ربما	لا	نعم	نعم	لا	لا	لا	لا	لا	ربما	ربما	ربما	ربما	ربما	ربما	ربما	ربما	نعم	نعم	نعم	نعم	ربما	ربما	ربما	لا
أنثى	26-35 سنة	متزوج/ة	أقل من 6000 جنيه مصري	ريف	شهادات عليا	شهادات عليا	جامعة بكالوريوس /دبلوم	طالب	لا	لا	لا	لا	نعم	الصحف - الكتب - المجلات	ربما	نعم	لا	نعم	لا	ربما	لا	ربما	لا	لا	ربما	لا	لا	لا	ربما	لا	لا	ربما	نعم	نعم	نعم	نعم	نعم	نعم	لا	لا
أنثى	18-25 سنة	أعزب\عزباء	أقل من 6000 جنيه مصري	ريف	جامعة بكالوريوس /دبلوم	جامعة بكالوريوس /دبلوم	جامعة بكالوريوس /دبلوم	طالب	نعم	لا	ليس لدي شريك	لا	نعم	الإنترنت, التلفاز, المدرسة, الأهل, الأصدقاء, الصحف - الكتب - المجلات, الطبيب, أخرى	نعم	ربما	لا	نعم	ربما	لا	لا	لا	لا	لا	ربما	لا	ربما	لا	ربما	لا	لا	نعم	نعم	نعم	نعم	نعم	ربما	ربما	لا	لا
أنثى	18-25 سنة	أعزب\عزباء	6000-12000 جنيه مصري	مدينة	ثانوي	ثانوي	شهادات عليا	طالب	لا	لا	ليس لدي شريك	لا	نعم	الأهل	نعم	نعم	لا	ربما	نعم	لا	لا	لا	لا	لا	ربما	لا	لا	لا	ربما	لا	لا	ربما	نعم	نعم	نعم	نعم	ربما	ربما	لا	لا
أنثى	18-25 سنة	متزوج/ة	6000-12000 جنيه مصري	مدينة	جامعة بكالوريوس /دبلوم	جامعة بكالوريوس /دبلوم	ثانوي	عاطل عن العمل	لا	لا	لا	لا	نعم	الأصدقاء	نعم	نعم	لا	ربما	لا	لا	لا	لا	لا	لا	ربما	لا	لا	لا	ربما	ربما	ربما	لا	نعم	نعم	نعم	نعم	نعم	نعم	نعم	نعم
أنثى	18-25 سنة	أعزب\عزباء	6000-12000 جنيه مصري	مدينة	جامعة بكالوريوس /دبلوم	جامعة بكالوريوس /دبلوم	جامعة بكالوريوس /دبلوم	طالب	نعم	لا	لا	لا	نعم	التلفاز	نعم	لا	نعم	نعم	نعم	لا	لا	لا	لا	لا	لا	لا	لا	لا	نعم	لا	لا	نعم	نعم	نعم	نعم	نعم	ربما	نعم	لا	لا
أنثى	18-25 سنة	أعزب\عزباء	أقل من 6000 جنيه مصري	ريف	جامعة بكالوريوس /دبلوم	جامعة بكالوريوس /دبلوم	جامعة بكالوريوس /دبلوم	عامل	نعم	لا	لا	لا	نعم	الإنترنت, الصحف - الكتب - المجلات	نعم	نعم	نعم	نعم	نعم	لا	لا	لا	لا	لا	ربما	ربما	لا	ربما	ربما	لا	لا	ربما	نعم	نعم	نعم	نعم	نعم	نعم	لا	لا
أنثى	18-25 سنة	أعزب\عزباء	أقل من 6000 جنيه مصري	مدينة	جامعة بكالوريوس /دبلوم	جامعة بكالوريوس /دبلوم	جامعة بكالوريوس /دبلوم	طالب	نعم	لا	ليس لدي شريك	لا	نعم	الأهل	نعم	نعم	نعم	لا	نعم	لا	لا	لا	لا	ربما	ربما	نعم	ربما	ربما	لا	ربما	ربما	نعم	ربما	نعم	ربما	ربما	ربما	ربما	ربما	نعم
أنثى	18-25 سنة	أعزب\عزباء	6000-12000 جنيه مصري	ريف	جامعة بكالوريوس /دبلوم	جامعة بكالوريوس /دبلوم	ابتدائي	عاطل عن العمل	لا	لا	ليس لدي شريك	لا	نعم	الإنترنت, التلفاز, الأهل, الأصدقاء, الصحف - الكتب - المجلات	ربما	نعم	نعم	ربما	نعم	ربما	لا	لا	لا	لا	ربما	لا	ربما	لا	ربما	لا	لا	ربما	نعم	نعم	نعم	نعم	نعم	نعم	لا	لا
ذكر	18-25 سنة	أعزب\عزباء	6000-12000 جنيه مصري	ريف	جامعة بكالوريوس /دبلوم	جامعة بكالوريوس /دبلوم	ابتدائي	طالب	نعم	لا	لا	لا	نعم	الطبيب, أخرى	نعم	نعم	نعم	نعم	نعم	لا	لا	لا	لا	لا	نعم	لا	ربما	لا	نعم	لا	لا	لا	نعم	نعم	نعم	لا	ربما	ربما	لا	لا
ذكر	18-25 سنة	أعزب\عزباء	6000-12000 جنيه مصري	مدينة	جامعة بكالوريوس /دبلوم	جامعة بكالوريوس /دبلوم	جامعة بكالوريوس /دبلوم	طالب	نعم	لا	ليس لدي شريك	لا	نعم	الأصدقاء	نعم	نعم	نعم	ربما	نعم	لا	لا	لا	لا	لا	لا	لا	ربما	لا	لا	لا	لا	نعم	نعم	نعم	نعم	نعم	ربما	ربما	لا	لا
أنثى	18-25 سنة	أعزب\عزباء	أقل من 6000 جنيه مصري	ريف	جامعة بكالوريوس /دبلوم	جامعة بكالوريوس /دبلوم	جامعة بكالوريوس /دبلوم	طالب	لا	لا	لا	لا	نعم	الأصدقاء	نعم	نعم	ربما	ربما	نعم	ربما	ربما	ربما	ربما	ربما	ربما	ربما	ربما	ربما	ربما	ربما	ربما	نعم	نعم	نعم	نعم	ربما	ربما	نعم	ربما	لا
أنثى	18-25 سنة	أعزب\عزباء	أقل من 6000 جنيه مصري	مدينة	جامعة بكالوريوس /دبلوم	جامعة بكالوريوس /دبلوم	جامعة بكالوريوس /دبلوم	طالب	نعم	لا	ليس لدي شريك	لا	نعم	الطبيب	نعم	نعم	نعم	ربما	نعم	لا	لا	لا	لا	لا	ربما	لا	نعم	لا	لا	لا	لا	ربما	نعم	نعم	نعم	نعم	لا	لا	ربما	لا
أنثى	18-25 سنة	أعزب\عزباء	أقل من 6000 جنيه مصري	مدينة	جامعة بكالوريوس /دبلوم	ابتدائي	ابتدائي	عاطل عن العمل	لا	لا	لا	لا	نعم	الإنترنت	ربما	ربما	نعم	ربما	نعم	لا	لا	لا	لا	لا	ربما	ربما	ربما	ربما	ربما	ربما	ربما	ربما	ربما	نعم	نعم	لا	ربما	ربما	لا	لا
أنثى	18-25 سنة	أعزب\عزباء	أقل من 6000 جنيه مصري	مدينة	جامعة بكالوريوس /دبلوم	شهادات عليا	شهادات عليا	طالب	لا	لا	ليس لدي شريك	لا	نعم	الأصدقاء	نعم	لا	لا	لا	نعم	لا	لا	لا	لا	لا	ربما	لا	نعم	لا	نعم	لا	ربما	لا	نعم	نعم	نعم	نعم	نعم	نعم	لا	لا
أنثى	18-25 سنة	أعزب\عزباء	6000-12000 جنيه مصري	مدينة	جامعة بكالوريوس /دبلوم	ثانوي	ثانوي	عامل	لا	لا	لا	لا	نعم	الأصدقاء	ربما	نعم	نعم	نعم	نعم	لا	لا	نعم	ربما	نعم	ربما	نعم	لا	ربما	لا	لا	لا	نعم	نعم	نعم	نعم	نعم	نعم	نعم	لا	لا
أنثى	18-25 سنة	متزوج/ة	6000-12000 جنيه مصري	مدينة	جامعة بكالوريوس /دبلوم	جامعة بكالوريوس /دبلوم	ثانوي	مربية منزل	لا	لا	لا	لا	نعم	الإنترنت, التلفاز, أخرى	نعم	ربما	لا	ربما	نعم	لا	لا	لا	لا	لا	ربما	لا	لا	لا	لا	لا	لا	لا	نعم	نعم	نعم	نعم	نعم	نعم	لا	لا
أنثى	18-25 سنة	أعزب\عزباء	أقل من 6000 جنيه مصري	ريف	جامعة بكالوريوس /دبلوم	جامعة بكالوريوس /دبلوم	جامعة بكالوريوس /دبلوم	عاطل عن العمل	لا	لا	لا	لا	نعم	الإنترنت	نعم	نعم	نعم	نعم	ربما	نعم	نعم	نعم	نعم	نعم	نعم	نعم	نعم	نعم	لا	ربما	ربما	ربما	نعم	نعم	نعم	نعم	نعم	نعم	نعم	نعم
أنثى	18-25 سنة	أعزب\عزباء	أقل من 6000 جنيه مصري	ريف	جامعة بكالوريوس /دبلوم	جامعة بكالوريوس /دبلوم	جامعة بكالوريوس /دبلوم	طالب	نعم	لا	ليس لدي شريك	لا	نعم	المدرسة, الصحف - الكتب - المجلات, أخرى	نعم	نعم	نعم	ربما	نعم	لا	لا	لا	لا	لا	ربما	لا	ربما	لا	ربما	لا	لا	نعم	نعم	نعم	نعم	نعم	لا	لا	ربما	لا
أنثى	18-25 سنة	أعزب\عزباء	أكثر من 12000 جنيه مصري	مدينة	جامعة بكالوريوس /دبلوم	جامعة بكالوريوس /دبلوم	جامعة بكالوريوس /دبلوم	طالب	نعم	لا	ليس لدي شريك	لا	نعم	الطبيب	نعم	لا	نعم	ربما	نعم	لا	لا	لا	لا	لا	لا	لا	نعم	لا	ربما	لا	لا	لا	نعم	نعم	نعم	ربما	ربما	ربما	لا	لا
أنثى	18-25 سنة	أعزب\عزباء	6000-12000 جنيه مصري	مدينة	ثانوي	جامعة بكالوريوس /دبلوم	جامعة بكالوريوس /دبلوم	طالب	نعم	لا	ليس لدي شريك	لا	نعم	الإنترنت	نعم	نعم	لا	ربما	نعم	لا	لا	لا	لا	لا	لا	لا	ربما	لا	لا	لا	لا	ربما	نعم	نعم	نعم	نعم	نعم	نعم	لا	لا
ذكر	26-35 سنة	أعزب\عزباء	6000-12000 جنيه مصري	مدينة	ثانوي	ثانوي	ثانوي	عامل	لا	لا	ليس لدي شريك	لا	لا	أخرى	ربما	ربما	ربما	ربما	ربما	ربما	ربما	ربما	ربما	ربما	ربما	ربما	ربما	ربما	ربما	ربما	ربما	ربما	نعم	نعم	نعم	نعم	نعم	نعم	ربما	لا
أنثى	18-25 سنة	أعزب\عزباء	6000-12000 جنيه مصري	مدينة	جامعة بكالوريوس /دبلوم	جامعة بكالوريوس /دبلوم	جامعة بكالوريوس /دبلوم	متقاعد	نعم	لا	لا	لا	نعم	الإنترنت, الأهل, الأصدقاء, الصحف - الكتب - المجلات, الطبيب, أخرى	نعم	نعم	ربما	نعم	نعم	لا	لا	لا	لا	لا	ربما	لا	ربما	لا	ربما	لا	ربما	لا	نعم	لا	نعم	ربما	لا	نعم	نعم	ربما
أنثى	18-25 سنة	أعزب\عزباء	أكثر من 12000 جنيه مصري	مدينة	جامعة بكالوريوس /دبلوم	جامعة بكالوريوس /دبلوم	جامعة بكالوريوس /دبلوم	طالب	نعم	لا	ليس لدي شريك	لا	نعم	الإنترنت, الأهل	نعم	نعم	ربما	نعم	نعم	لا	لا	لا	لا	لا	لا	لا	لا	لا	لا	لا	لا	ربما	نعم	نعم	نعم	نعم	ربما	ربما	لا	لا
أنثى	18-25 سنة	أعزب\عزباء	أقل من 6000 جنيه مصري	ريف	جامعة بكالوريوس /دبلوم	جامعة بكالوريوس /دبلوم	جامعة بكالوريوس /دبلوم	طالب	نعم	لا	ليس لدي شريك	لا	نعم	المدرسة	نعم	نعم	نعم	نعم	نعم	لا	لا	لا	لا	لا	ربما	لا	نعم	لا	نعم	لا	لا	ربما	نعم	ربما	نعم	نعم	ربما	ربما	لا	لا
ذكر	18-25 سنة	أعزب\عزباء	6000-12000 جنيه مصري	ريف	جامعة بكالوريوس /دبلوم	شهادات عليا	جامعة بكالوريوس /دبلوم	طالب	نعم	لا	ليس لدي شريك	لا	نعم	الأهل	نعم	ربما	نعم	نعم	ربما	نعم	لا	نعم	لا	نعم	ربما	لا	ربما	لا	ربما	لا	لا	نعم	ربما	لا	نعم	ربما	نعم	نعم	ربما	لا
ذكر	18-25 سنة	أعزب\عزباء	أقل من 6000 جنيه مصري	ريف	جامعة بكالوريوس /دبلوم	جامعة بكالوريوس /دبلوم	جامعة بكالوريوس /دبلوم	طالب	نعم	لا	ليس لدي شريك	لا	نعم	الطبيب	نعم	نعم	نعم	نعم	نعم	لا	لا	لا	لا	لا	نعم	نعم	نعم	لا	لا	لا	لا	نعم	نعم	نعم	نعم	نعم	لا	لا	نعم	نعم
ذكر	18-25 سنة	أعزب\عزباء	6000-12000 جنيه مصري	ريف	جامعة بكالوريوس /دبلوم	ابتدائي	ابتدائي	طالب	نعم	لا	ليس لدي شريك	لا	نعم	أخرى	نعم	لا	نعم	نعم	نعم	ربما	لا	نعم	نعم	نعم	نعم	نعم	نعم	نعم	نعم	نعم	لا	نعم	نعم	نعم	نعم	نعم	لا	لا	نعم	لا
أنثى	18-25 سنة	أعزب\عزباء	أقل من 6000 جنيه مصري	ريف	جامعة بكالوريوس /دبلوم	شهادات عليا	شهادات عليا	طالب	نعم	لا	ليس لدي شريك	لا	نعم	أخرى	نعم	نعم	لا	لا	نعم	لا	ربما	لا	لا	لا	نعم	لا	نعم	لا	نعم	لا	لا	لا	نعم	نعم	نعم	نعم	ربما	ربما	ربما	ربما
أنثى	18-25 سنة	أعزب\عزباء	أقل من 6000 جنيه مصري	مدينة	جامعة بكالوريوس /دبلوم	جامعة بكالوريوس /دبلوم	جامعة بكالوريوس /دبلوم	طالب	نعم	لا	لا	لا	نعم	الإنترنت, التلفاز, المدرسة, الأصدقاء	نعم	ربما	لا	نعم	نعم	لا	لا	لا	لا	لا	ربما	لا	ربما	ربما	ربما	لا	لا	ربما	نعم	نعم	نعم	نعم	ربما	ربما	لا	لا
ذكر	18-25 سنة	أعزب\عزباء	6000-12000 جنيه مصري	مدينة	ثانوي	جامعة بكالوريوس /دبلوم	جامعة بكالوريوس /دبلوم	طالب	نعم	لا	لا	لا	لا	الإنترنت, التلفاز, الصحف - الكتب - المجلات	نعم	لا	لا	لا	لا	ربما	لا	لا	لا	لا	نعم	لا	لا	لا	لا	نعم	لا	لا	لا	لا	لا	لا	لا	لا	لا	لا
ذكر	18-25 سنة	أعزب\عزباء	أقل من 6000 جنيه مصري	ريف	جامعة بكالوريوس /دبلوم	جامعة بكالوريوس /دبلوم	جامعة بكالوريوس /دبلوم	طالب	نعم	لا	لا	لا	لا	الإنترنت	نعم	ربما	ربما	ربما	ربما	ربما	ربما	ربما	ربما	ربما	ربما	ربما	ربما	ربما	ربما	ربما	ربما	ربما	ربما	ربما	ربما	ربما	ربما	ربما	ربما	ربما
ذكر	18-25 سنة	أعزب\عزباء	أقل من 6000 جنيه مصري	ريف	جامعة بكالوريوس /دبلوم	جامعة بكالوريوس /دبلوم	جامعة بكالوريوس /دبلوم	طالب	نعم	لا	ليس لدي شريك	لا	نعم	الإنترنت, الصحف - الكتب - المجلات, الطبيب	نعم	نعم	نعم	ربما	نعم	لا	لا	لا	لا	لا	لا	لا	لا	ربما	لا	ربما	لا	نعم	نعم	نعم	نعم	نعم	نعم	نعم	لا	لا
ذكر	18-25 سنة	أعزب\عزباء	أقل من 6000 جنيه مصري	ريف	جامعة بكالوريوس /دبلوم	ثانوي	ثانوي	طالب	نعم	لا	لا	لا	لا	أخرى	نعم	لا	نعم	لا	نعم	لا	لا	لا	لا	لا	نعم	لا	نعم	ربما	ربما	لا	لا	ربما	ربما	ربما	ربما	ربما	لا	لا	نعم	ربما
ذكر	26-35 سنة	متزوج/ة	أقل من 6000 جنيه مصري	ريف	ثانوي	ابتدائي	ابتدائي	عامل	لا	لا	لا	لا	نعم	الإنترنت	نعم	لا	نعم	ربما	نعم	ربما	ربما	ربما	ربما	نعم	ربما	ربما	لا	ربما	ربما	ربما	ربما	نعم	لا	نعم	نعم	لا	لا	لا	لا	لا
ذكر	18-25 سنة	أعزب\عزباء	أقل من 6000 جنيه مصري	ريف	جامعة بكالوريوس /دبلوم	جامعة بكالوريوس /دبلوم	جامعة بكالوريوس /دبلوم	طالب	نعم	لا	لا	لا	لا	أخرى	ربما	ربما	ربما	ربما	ربما	ربما	ربما	ربما	ربما	ربما	ربما	ربما	ربما	ربما	ربما	ربما	ربما	ربما	نعم	نعم	نعم	نعم	لا	نعم	لا	لا
ذكر	18-25 سنة	أعزب\عزباء	أقل من 6000 جنيه مصري	ريف	جامعة بكالوريوس /دبلوم	جامعة بكالوريوس /دبلوم	جامعة بكالوريوس /دبلوم	طالب	نعم	لا	لا	لا	نعم	الأهل	نعم	نعم	نعم	نعم	نعم	لا	لا	لا	لا	لا	نعم	لا	نعم	لا	لا	لا	لا	لا	نعم	نعم	نعم	نعم	لا	لا	لا	لا
ذكر	18-25 سنة	أعزب\عزباء	6000-12000 جنيه مصري	ريف	ثانوي	ابتدائي	ابتدائي	عامل	لا	لا	نعم	لا	نعم	الأصدقاء	نعم	نعم	لا	نعم	نعم	لا	نعم	نعم	نعم	نعم	نعم	نعم	نعم	نعم	نعم	نعم	نعم	نعم	نعم	نعم	نعم	نعم	نعم	نعم	نعم	نعم
ذكر	26-35 سنة	متزوج/ة	أقل من 6000 جنيه مصري	مدينة	جامعة بكالوريوس /دبلوم	ثانوي	ثانوي	متقاعد	لا	لا	نعم	نعم	نعم	المدرسة	ربما	لا	لا	ربما	لا	ربما	لا	ربما	ربما	ربما	لا	نعم	لا	ربما	ربما	نعم	لا	لا	نعم	لا	لا	ربما	لا	لا	لا	لا
ذكر	18-25 سنة	أعزب\عزباء	6000-12000 جنيه مصري	ريف	جامعة بكالوريوس /دبلوم	جامعة بكالوريوس /دبلوم	جامعة بكالوريوس /دبلوم	طالب	نعم	لا	لا	لا	نعم	الإنترنت, الصحف - الكتب - المجلات, الطبيب, أخرى	نعم	ربما	ربما	ربما	ربما	ربما	لا	نعم	لا	ربما	ربما	ربما	ربما	ربما	ربما	ربما	ربما	لا	نعم	نعم	نعم	نعم	ربما	ربما	ربما	لا
أنثى	18-25 سنة	أعزب\عزباء	أقل من 6000 جنيه مصري	مدينة	جامعة بكالوريوس /دبلوم	جامعة بكالوريوس /دبلوم	ابتدائي	عامل	لا	لا	ليس لدي شريك	لا	نعم	الإنترنت, التلفاز	نعم	لا	ربما	لا	نعم	لا	لا	لا	لا	لا	لا	لا	نعم	لا	نعم	لا	لا	لا	نعم	نعم	نعم	نعم	نعم	نعم	لا	لا
ذكر	18-25 سنة	أعزب\عزباء	أقل من 6000 جنيه مصري	ريف	جامعة بكالوريوس /دبلوم	جامعة بكالوريوس /دبلوم	جامعة بكالوريوس /دبلوم	عامل	نعم	لا	لا	لا	نعم	الإنترنت, التلفاز, المدرسة, الأهل, الأصدقاء, الصحف - الكتب - المجلات, الطبيب	نعم	ربما	نعم	ربما	نعم	نعم	لا	نعم	لا	نعم	نعم	لا	ربما	ربما	ربما	لا	لا	ربما	نعم	ربما	نعم	نعم	لا	لا	لا	نعم
ذكر	18-25 سنة	متزوج/ة	6000-12000 جنيه مصري	ريف	جامعة بكالوريوس /دبلوم	ابتدائي	ابتدائي	طالب	لا	لا	لا	لا	نعم	الأصدقاء	ربما	ربما	نعم	لا	نعم	لا	لا	لا	لا	لا	لا	ربما	ربما	لا	ربما	لا	لا	نعم	ربما	نعم	نعم	نعم	ربما	ربما	لا	لا
ذكر	18-25 سنة	أعزب\عزباء	6000-12000 جنيه مصري	ريف	جامعة بكالوريوس /دبلوم	جامعة بكالوريوس /دبلوم	جامعة بكالوريوس /دبلوم	طالب	نعم	لا	ليس لدي شريك	لا	نعم	أخرى	نعم	ربما	لا	ربما	نعم	لا	لا	لا	لا	لا	ربما	لا	ربما	ربما	ربما	لا	لا	نعم	نعم	نعم	نعم	نعم	نعم	نعم	لا	لا
أنثى	18-25 سنة	أعزب\عزباء	أقل من 6000 جنيه مصري	ريف	جامعة بكالوريوس /دبلوم	جامعة بكالوريوس /دبلوم	جامعة بكالوريوس /دبلوم	طالب	نعم	لا	لا	لا	نعم	الإنترنت, التلفاز, أخرى	نعم	نعم	نعم	لا	نعم	لا	لا	لا	لا	ربما	ربما	ربما	ربما	لا	لا	لا	لا	نعم	نعم	نعم	نعم	نعم	ربما	ربما	لا	لا
أنثى	18-25 سنة	أعزب\عزباء	6000-12000 جنيه مصري	ريف	ثانوي	جامعة بكالوريوس /دبلوم	جامعة بكالوريوس /دبلوم	عامل	نعم	لا	ليس لدي شريك	لا	نعم	الإنترنت, التلفاز, المدرسة, الأهل, الأصدقاء, الصحف - الكتب - المجلات, الطبيب	نعم	نعم	لا	نعم	نعم	لا	لا	لا	لا	لا	لا	لا	لا	لا	لا	لا	لا	لا	نعم	نعم	نعم	نعم	لا	لا	ربما	ربما
أنثى	18-25 سنة	أعزب\عزباء	6000-12000 جنيه مصري	ريف	جامعة بكالوريوس /دبلوم	جامعة بكالوريوس /دبلوم	جامعة بكالوريوس /دبلوم	طالب	نعم	لا	ليس لدي شريك	لا	نعم	الإنترنت	نعم	ربما	لا	ربما	نعم	لا	لا	لا	لا	لا	ربما	لا	ربما	لا	ربما	لا	لا	لا	نعم	نعم	نعم	نعم	ربما	ربما	لا	لا
ذكر	18-25 سنة	أعزب\عزباء	6000-12000 جنيه مصري	ريف	جامعة بكالوريوس /دبلوم	جامعة بكالوريوس /دبلوم	جامعة بكالوريوس /دبلوم	طالب	نعم	لا	ليس لدي شريك	لا	نعم	الإنترنت, التلفاز	نعم	نعم	لا	نعم	نعم	لا	لا	لا	لا	نعم	نعم	نعم	نعم	نعم	لا	لا	لا	لا	نعم	نعم	نعم	نعم	لا	ربما	لا	لا
أنثى	18-25 سنة	أعزب\عزباء	أقل من 6000 جنيه مصري	ريف	جامعة بكالوريوس /دبلوم	جامعة بكالوريوس /دبلوم	جامعة بكالوريوس /دبلوم	طالب	لا	لا	ليس لدي شريك	لا	نعم	الإنترنت, الصحف - الكتب - المجلات	نعم	ربما	لا	نعم	نعم	لا	لا	لا	لا	لا	ربما	ربما	ربما	ربما	ربما	ربما	لا	ربما	نعم	نعم	نعم	نعم	لا	لا	لا	لا
ذكر	18-25 سنة	أعزب\عزباء	أقل من 6000 جنيه مصري	مدينة	جامعة بكالوريوس /دبلوم	ثانوي	ثانوي	طالب	نعم	لا	لا	لا	نعم	الإنترنت, التلفاز, الأهل, الأصدقاء, أخرى	نعم	لا	ربما	لا	نعم	لا	لا	لا	لا	لا	لا	لا	نعم	لا	لا	لا	لا	ربما	نعم	نعم	نعم	نعم	ربما	ربما	لا	لا
أنثى	18-25 سنة	متزوج/ة	6000-12000 جنيه مصري	مدينة	جامعة بكالوريوس /دبلوم	جامعة بكالوريوس /دبلوم	ثانوي	طالب	لا	لا	لا	لا	نعم	الإنترنت, التلفاز, المدرسة, الأهل, الأصدقاء, الصحف - الكتب - المجلات, الطبيب	نعم	ربما	نعم	ربما	نعم	لا	لا	لا	لا	لا	ربما	ربما	ربما	ربما	ربما	لا	لا	نعم	نعم	نعم	نعم	نعم	نعم	نعم	لا	لا
ذكر	18-25 سنة	أعزب\عزباء	6000-12000 جنيه مصري	ريف	جامعة بكالوريوس /دبلوم	جامعة بكالوريوس /دبلوم	جامعة بكالوريوس /دبلوم	طالب	نعم	لا	لا	لا	نعم	المدرسة	نعم	لا	لا	لا	لا	لا	لا	لا	لا	لا	لا	لا	لا	لا	لا	لا	لا	لا	لا	لا	لا	لا	لا	لا	لا	لا
أنثى	18-25 سنة	أعزب\عزباء	أقل من 6000 جنيه مصري	ريف	جامعة بكالوريوس /دبلوم	جامعة بكالوريوس /دبلوم	جامعة بكالوريوس /دبلوم	طالب	لا	لا	ليس لدي شريك	لا	نعم	الإنترنت	نعم	نعم	ربما	ربما	نعم	لا	لا	لا	لا	لا	لا	لا	لا	لا	لا	لا	لا	لا	نعم	نعم	نعم	نعم	نعم	نعم	لا	لا
أنثى	18-25 سنة	أعزب\عزباء	6000-12000 جنيه مصري	مدينة	جامعة بكالوريوس /دبلوم	شهادات عليا	شهادات عليا	عامل	نعم	لا	لا	لا	نعم	الإنترنت	نعم	نعم	ربما	نعم	ربما	لا	لا	لا	لا	ربما	نعم	ربما	نعم	ربما	نعم	ربما	لا	لا	نعم	نعم	ربما	نعم	ربما	ربما	لا	لا
ذكر	18-25 سنة	أعزب\عزباء	6000-12000 جنيه مصري	ريف	جامعة بكالوريوس /دبلوم	جامعة بكالوريوس /دبلوم	جامعة بكالوريوس /دبلوم	طالب	نعم	لا	ليس لدي شريك	لا	نعم	الإنترنت	نعم	ربما	نعم	ربما	نعم	ربما	لا	ربما	ربما	نعم	ربما	لا	ربما	ربما	ربما	لا	لا	ربما	نعم	نعم	نعم	نعم	نعم	نعم	لا	لا
ذكر	26-35 سنة	متزوج/ة	أكثر من 12000 جنيه مصري	ريف	شهادات عليا	ابتدائي	ابتدائي	عامل	لا	نعم	لا	لا	نعم	الصحف - الكتب - المجلات, أخرى	نعم	نعم	نعم	نعم	نعم	لا	لا	لا	لا	لا	لا	لا	لا	لا	لا	لا	لا	لا	نعم	نعم	نعم	نعم	نعم	نعم	نعم	ربما
أنثى	18-25 سنة	أعزب\عزباء	6000-12000 جنيه مصري	مدينة	جامعة بكالوريوس /دبلوم	شهادات عليا	شهادات عليا	عامل	نعم	لا	ليس لدي شريك	لا	نعم	الإنترنت	نعم	نعم	ربما	نعم	نعم	لا	لا	لا	لا	ربما	نعم	لا	نعم	ربما	نعم	ربما	لا	ربما	نعم	نعم	ربما	نعم	ربما	ربما	لا	لا
أنثى	18-25 سنة	أعزب\عزباء	6000-12000 جنيه مصري	مدينة	جامعة بكالوريوس /دبلوم	جامعة بكالوريوس /دبلوم	جامعة بكالوريوس /دبلوم	طالب	نعم	لا	ليس لدي شريك	لا	نعم	الإنترنت	نعم	نعم	لا	ربما	نعم	لا	لا	لا	لا	لا	لا	لا	ربما	ربما	لا	لا	لا	ربما	نعم	نعم	نعم	ربما	ربما	ربما	لا	لا
أنثى	18-25 سنة	أعزب\عزباء	أقل من 6000 جنيه مصري	مدينة	جامعة بكالوريوس /دبلوم	ابتدائي	جامعة بكالوريوس /دبلوم	طالب	نعم	لا	لا	لا	نعم	الإنترنت	نعم	ربما	نعم	ربما	نعم	لا	لا	لا	لا	لا	نعم	لا	لا	لا	ربما	ربما	لا	ربما	نعم	نعم	نعم	نعم	نعم	نعم	لا	لا
ذكر	18-25 سنة	أعزب\عزباء	أقل من 6000 جنيه مصري	مدينة	جامعة بكالوريوس /دبلوم	جامعة بكالوريوس /دبلوم	ثانوي	طالب	نعم	لا	لا	لا	نعم	الإنترنت	نعم	لا	لا	نعم	نعم	لا	لا	لا	لا	لا	لا	لا	نعم	لا	لا	نعم	لا	نعم	نعم	نعم	نعم	نعم	ربما	ربما	ربما	لا
ذكر	18-25 سنة	أعزب\عزباء	أقل من 6000 جنيه مصري	ريف	شهادات عليا	جامعة بكالوريوس /دبلوم	جامعة بكالوريوس /دبلوم	عاطل عن العمل	نعم	لا	ليس لدي شريك	لا	نعم	الإنترنت, الصحف - الكتب - المجلات	ربما	نعم	ربما	ربما	ربما	ربما	ربما	ربما	ربما	نعم	ربما	ربما	ربما	ربما	ربما	ربما	ربما	ربما	ربما	ربما	ربما	ربما	ربما	ربما	ربما	ربما
ذكر	18-25 سنة	أعزب\عزباء	أقل من 6000 جنيه مصري	ريف	جامعة بكالوريوس /دبلوم	جامعة بكالوريوس /دبلوم	جامعة بكالوريوس /دبلوم	متقاعد	نعم	لا	نعم	لا	لا	الأهل	ربما	ربما	ربما	ربما	ربما	ربما	ربما	ربما	ربما	ربما	ربما	ربما	ربما	ربما	ربما	ربما	ربما	ربما	ربما	ربما	ربما	ربما	ربما	ربما	ربما	ربما
أنثى	18-25 سنة	أعزب\عزباء	أقل من 6000 جنيه مصري	ريف	شهادات عليا	شهادات عليا	ابتدائي	عاطل عن العمل	لا	لا	لا	لا	نعم	الإنترنت, المدرسة, الصحف - الكتب - المجلات	نعم	ربما	ربما	لا	نعم	لا	لا	لا	لا	لا	ربما	لا	ربما	ربما	ربما	لا	لا	لا	نعم	نعم	نعم	نعم	نعم	ربما	لا	لا
أنثى	18-25 سنة	أعزب\عزباء	أقل من 6000 جنيه مصري	ريف	جامعة بكالوريوس /دبلوم	جامعة بكالوريوس /دبلوم	جامعة بكالوريوس /دبلوم	طالب	نعم	لا	ليس لدي شريك	لا	نعم	الإنترنت	نعم	ربما	نعم	ربما	نعم	لا	لا	لا	لا	لا	لا	لا	ربما	لا	ربما	لا	لا	لا	نعم	نعم	نعم	ربما	ربما	ربما	ربما	لا
أنثى	18-25 سنة	أعزب\عزباء	6000-12000 جنيه مصري	مدينة	جامعة بكالوريوس /دبلوم	جامعة بكالوريوس /دبلوم	جامعة بكالوريوس /دبلوم	طالب	نعم	لا	ليس لدي شريك	لا	نعم	الأصدقاء	نعم	ربما	لا	ربما	نعم	لا	لا	لا	لا	لا	ربما	لا	ربما	لا	ربما	لا	لا	ربما	نعم	نعم	نعم	نعم	نعم	لا	لا	لا
أنثى	18-25 سنة	أعزب\عزباء	أقل من 6000 جنيه مصري	ريف	ثانوي	جامعة بكالوريوس /دبلوم	ابتدائي	طالب	لا	لا	لا	لا	نعم	الإنترنت, التلفاز, المدرسة, الأهل, الأصدقاء, الصحف - الكتب - المجلات	نعم	لا	ربما	نعم	نعم	لا	لا	لا	لا	لا	لا	لا	ربما	لا	ربما	لا	لا	لا	نعم	نعم	نعم	نعم	ربما	ربما	لا	لا
ذكر	18-25 سنة	أعزب\عزباء	أقل من 6000 جنيه مصري	ريف	جامعة بكالوريوس /دبلوم	جامعة بكالوريوس /دبلوم	جامعة بكالوريوس /دبلوم	طالب	لا	لا	لا	لا	لا	أخرى	ربما	لا	لا	لا	لا	لا	لا	لا	لا	لا	لا	لا	لا	لا	لا	لا	لا	لا	لا	لا	لا	لا	لا	لا	لا	لا
أنثى	18-25 سنة	متزوج/ة	أقل من 6000 جنيه مصري	مدينة	جامعة بكالوريوس /دبلوم	جامعة بكالوريوس /دبلوم	جامعة بكالوريوس /دبلوم	عامل	لا	لا	لا	لا	نعم	الإنترنت	نعم	نعم	نعم	ربما	نعم	ربما	لا	لا	لا	لا	ربما	ربما	ربما	ربما	ربما	ربما	ربما	ربما	نعم	نعم	نعم	نعم	نعم	نعم	لا	لا
أنثى	18-25 سنة	أعزب\عزباء	أقل من 6000 جنيه مصري	مدينة	جامعة بكالوريوس /دبلوم	جامعة بكالوريوس /دبلوم	جامعة بكالوريوس /دبلوم	طالب	لا	لا	لا	لا	نعم	الإنترنت, التلفاز, الصحف - الكتب - المجلات	نعم	ربما	نعم	لا	نعم	لا	لا	لا	لا	لا	لا	لا	ربما	لا	لا	لا	لا	ربما	نعم	نعم	نعم	نعم	لا	لا	لا	لا
أنثى	18-25 سنة	أعزب\عزباء	أكثر من 12000 جنيه مصري	ريف	جامعة بكالوريوس /دبلوم	ثانوي	ثانوي	طالب	نعم	لا	ليس لدي شريك	لا	نعم	التلفاز	لا	لا	لا	لا	نعم	لا	لا	لا	لا	لا	لا	لا	ربما	لا	ربما	لا	ربما	لا	نعم	نعم	نعم	نعم	ربما	نعم	لا	لا
ذكر	18-25 سنة	أعزب\عزباء	أقل من 6000 جنيه مصري	ريف	جامعة بكالوريوس /دبلوم	جامعة بكالوريوس /دبلوم	ثانوي	طالب	لا	لا	ليس لدي شريك	لا	لا	الإنترنت	ربما	ربما	ربما	ربما	ربما	ربما	ربما	ربما	ربما	ربما	ربما	ربما	ربما	ربما	ربما	ربما	ربما	ربما	لا	ربما	ربما	ربما	ربما	ربما	ربما	ربما
أنثى	18-25 سنة	أعزب\عزباء	6000-12000 جنيه مصري	ريف	جامعة بكالوريوس /دبلوم	ثانوي	ثانوي	طالب	نعم	لا	ليس لدي شريك	لا	نعم	الأصدقاء, الطبيب, أخرى	نعم	نعم	نعم	نعم	نعم	لا	لا	لا	لا	نعم	ربما	لا	ربما	ربما	نعم	لا	لا	ربما	نعم	نعم	نعم	نعم	ربما	ربما	لا	لا
ذكر	18-25 سنة	أعزب\عزباء	6000-12000 جنيه مصري	ريف	جامعة بكالوريوس /دبلوم	جامعة بكالوريوس /دبلوم	ثانوي	طالب	لا	لا	ليس لدي شريك	لا	نعم	الإنترنت, الطبيب	نعم	نعم	نعم	نعم	نعم	لا	لا	لا	لا	لا	نعم	لا	ربما	لا	ربما	ربما	لا	ربما	نعم	نعم	نعم	نعم	ربما	ربما	نعم	ربما
أنثى	18-25 سنة	أعزب\عزباء	أقل من 6000 جنيه مصري	ريف	جامعة بكالوريوس /دبلوم	جامعة بكالوريوس /دبلوم	ابتدائي	طالب	لا	لا	ليس لدي شريك	لا	لا	الإنترنت	نعم	ربما	نعم	ربما	نعم	لا	لا	لا	لا	ربما	لا	لا	لا	ربما	لا	لا	لا	لا	نعم	ربما	ربما	ربما	لا	ربما	لا	ربما
أنثى	18-25 سنة	أعزب\عزباء	أقل من 6000 جنيه مصري	مدينة	شهادات عليا	شهادات عليا	شهادات عليا	طالب	لا	لا	ليس لدي شريك	لا	نعم	الإنترنت, التلفاز	نعم	ربما	ربما	ربما	ربما	لا	لا	لا	لا	ربما	ربما	ربما	ربما	ربما	ربما	ربما	ربما	ربما	ربما	ربما	ربما	ربما	ربما	ربما	ربما	ربما
ذكر	18-25 سنة	أعزب\عزباء	6000-12000 جنيه مصري	مدينة	جامعة بكالوريوس /دبلوم	جامعة بكالوريوس /دبلوم	ثانوي	طالب	نعم	لا	ليس لدي شريك	لا	نعم	الإنترنت, التلفاز, الصحف - الكتب - المجلات	نعم	ربما	نعم	ربما	نعم	ربما	ربما	ربما	ربما	ربما	ربما	ربما	لا	لا	ربما	ربما	لا	نعم	نعم	ربما	نعم	نعم	نعم	نعم	ربما	لا
أنثى	18-25 سنة	أعزب\عزباء	أقل من 6000 جنيه مصري	مدينة	جامعة بكالوريوس /دبلوم	جامعة بكالوريوس /دبلوم	جامعة بكالوريوس /دبلوم	عامل	نعم	لا	ليس لدي شريك	لا	نعم	التلفاز	نعم	ربما	ربما	ربما	ربما	لا	ربما	ربما	ربما	ربما	ربما	ربما	ربما	ربما	ربما	ربما	ربما	ربما	نعم	نعم	نعم	نعم	ربما	نعم	لا	لا
ذكر	18-25 سنة	أعزب\عزباء	6000-12000 جنيه مصري	ريف	جامعة بكالوريوس /دبلوم	ثانوي	ابتدائي	طالب	نعم	لا	ليس لدي شريك	لا	نعم	المدرسة	نعم	ربما	ربما	ربما	نعم	لا	لا	لا	لا	ربما	نعم	لا	لا	ربما	نعم	لا	لا	ربما	نعم	نعم	نعم	نعم	نعم	نعم	لا	لا
أنثى	18-25 سنة	أعزب\عزباء	6000-12000 جنيه مصري	مدينة	جامعة بكالوريوس /دبلوم	شهادات عليا	شهادات عليا	طالب	نعم	نعم	ليس لدي شريك	نعم	نعم	الأهل	ربما	ربما	لا	لا	نعم	لا	لا	لا	لا	لا	لا	لا	ربما	لا	لا	لا	لا	ربما	نعم	نعم	نعم	نعم	ربما	ربما	لا	لا
أنثى	18-25 سنة	أعزب\عزباء	أقل من 6000 جنيه مصري	مدينة	جامعة بكالوريوس /دبلوم	جامعة بكالوريوس /دبلوم	جامعة بكالوريوس /دبلوم	طالب	لا	لا	ليس لدي شريك	لا	نعم	الإنترنت, التلفاز, المدرسة, الصحف - الكتب - المجلات	لا	ربما	نعم	نعم	ربما	لا	لا	ربما	ربما	لا	ربما	لا	نعم	ربما	لا	لا	لا	نعم	نعم	نعم	نعم	نعم	نعم	نعم	لا	لا
أنثى	18-25 سنة	أعزب\عزباء	6000-12000 جنيه مصري	ريف	جامعة بكالوريوس /دبلوم	جامعة بكالوريوس /دبلوم	جامعة بكالوريوس /دبلوم	طالب	نعم	لا	لا	لا	نعم	الإنترنت, الأهل, الأصدقاء	ربما	نعم	لا	ربما	نعم	ربما	ربما	ربما	ربما	ربما	ربما	نعم	نعم	ربما	ربما	لا	لا	ربما	نعم	نعم	نعم	نعم	ربما	ربما	لا	لا
أنثى	18-25 سنة	أعزب\عزباء	أقل من 6000 جنيه مصري	ريف	جامعة بكالوريوس /دبلوم	ثانوي	جامعة بكالوريوس /دبلوم	طالب	نعم	لا	ليس لدي شريك	لا	نعم	المدرسة, الصحف - الكتب - المجلات, أخرى	نعم	نعم	نعم	نعم	نعم	لا	لا	لا	لا	لا	نعم	لا	ربما	لا	نعم	ربما	لا	نعم	نعم	نعم	نعم	نعم	لا	لا	ربما	لا
أنثى	18-25 سنة	أعزب\عزباء	6000-12000 جنيه مصري	مدينة	جامعة بكالوريوس /دبلوم	شهادات عليا	جامعة بكالوريوس /دبلوم	طالب	نعم	لا	ليس لدي شريك	لا	نعم	الإنترنت	نعم	ربما	لا	ربما	نعم	لا	لا	لا	لا	لا	ربما	لا	ربما	لا	لا	لا	لا	ربما	نعم	نعم	نعم	نعم	ربما	ربما	لا	لا
أنثى	18-25 سنة	أعزب\عزباء	أكثر من 12000 جنيه مصري	مدينة	جامعة بكالوريوس /دبلوم	جامعة بكالوريوس /دبلوم	جامعة بكالوريوس /دبلوم	طالب	لا	لا	ليس لدي شريك	لا	نعم	الإنترنت, الأهل, أخرى	نعم	نعم	نعم	ربما	ربما	لا	لا	لا	لا	لا	ربما	ربما	ربما	لا	ربما	لا	لا	ربما	نعم	نعم	نعم	نعم	ربما	ربما	لا	لا
ذكر	18-25 سنة	أعزب\عزباء	6000-12000 جنيه مصري	ريف	جامعة بكالوريوس /دبلوم	جامعة بكالوريوس /دبلوم	ثانوي	طالب	نعم	لا	ليس لدي شريك	لا	نعم	الإنترنت, التلفاز, أخرى	نعم	ربما	ربما	ربما	نعم	لا	لا	لا	لا	لا	لا	لا	نعم	لا	ربما	ربما	لا	ربما	نعم	نعم	نعم	نعم	ربما	ربما	ربما	ربما
أنثى	18-25 سنة	أعزب\عزباء	6000-12000 جنيه مصري	ريف	جامعة بكالوريوس /دبلوم	جامعة بكالوريوس /دبلوم	جامعة بكالوريوس /دبلوم	طالب	نعم	لا	لا	لا	نعم	الصحف - الكتب - المجلات	نعم	نعم	ربما	ربما	ربما	لا	لا	لا	لا	لا	لا	لا	لا	لا	لا	لا	لا	ربما	نعم	نعم	نعم	نعم	ربما	ربما	لا	ربما
أنثى	18-25 سنة	أعزب\عزباء	أقل من 6000 جنيه مصري	مدينة	جامعة بكالوريوس /دبلوم	جامعة بكالوريوس /دبلوم	جامعة بكالوريوس /دبلوم	طالب	لا	لا	لا	لا	نعم	التلفاز	نعم	ربما	نعم	نعم	نعم	لا	لا	لا	لا	لا	نعم	لا	لا	لا	لا	لا	لا	لا	نعم	نعم	نعم	نعم	نعم	نعم	لا	لا
أنثى	18-25 سنة	أعزب\عزباء	أقل من 6000 جنيه مصري	ريف	جامعة بكالوريوس /دبلوم	شهادات عليا	ثانوي	طالب	نعم	لا	ليس لدي شريك	لا	لا	أخرى	ربما	ربما	ربما	ربما	نعم	ربما	ربما	ربما	ربما	ربما	ربما	ربما	ربما	ربما	ربما	لا	ربما	نعم	ربما	نعم	نعم	نعم	نعم	نعم	لا	لا
أنثى	18-25 سنة	أعزب\عزباء	أقل من 6000 جنيه مصري	ريف	جامعة بكالوريوس /دبلوم	ابتدائي	ابتدائي	طالب	نعم	لا	لا	لا	نعم	الإنترنت, المدرسة	ربما	نعم	لا	ربما	نعم	لا	لا	لا	لا	لا	لا	لا	ربما	لا	ربما	لا	لا	لا	نعم	نعم	نعم	نعم	ربما	نعم	ربما	لا
أنثى	18-25 سنة	أعزب\عزباء	6000-12000 جنيه مصري	مدينة	جامعة بكالوريوس /دبلوم	شهادات عليا	شهادات عليا	طالب	نعم	نعم	ليس لدي شريك	نعم	نعم	الإنترنت, الأهل, الطبيب	نعم	نعم	لا	نعم	نعم	لا	لا	لا	لا	لا	لا	لا	ربما	لا	ربما	لا	لا	نعم	نعم	نعم	نعم	نعم	نعم	نعم	لا	لا
أنثى	18-25 سنة	أعزب\عزباء	أقل من 6000 جنيه مصري	ريف	ثانوي	ابتدائي	ثانوي	طالب	لا	لا	ليس لدي شريك	لا	نعم	الإنترنت, التلفاز	نعم	ربما	ربما	ربما	نعم	لا	لا	لا	لا	لا	ربما	لا	لا	لا	لا	لا	لا	ربما	نعم	نعم	نعم	نعم	ربما	ربما	ربما	لا
أنثى	18-25 سنة	أعزب\عزباء	أكثر من 12000 جنيه مصري	مدينة	جامعة بكالوريوس /دبلوم	جامعة بكالوريوس /دبلوم	جامعة بكالوريوس /دبلوم	طالب	نعم	لا	ليس لدي شريك	لا	نعم	الإنترنت, التلفاز	نعم	نعم	ربما	نعم	نعم	لا	لا	لا	لا	لا	لا	لا	نعم	لا	لا	لا	لا	لا	نعم	نعم	نعم	نعم	نعم	نعم	لا	لا
أنثى	18-25 سنة	أعزب\عزباء	أقل من 6000 جنيه مصري	مدينة	شهادات عليا	جامعة بكالوريوس /دبلوم	جامعة بكالوريوس /دبلوم	عامل	نعم	لا	ليس لدي شريك	لا	نعم	الإنترنت	نعم	لا	ربما	ربما	نعم	لا	لا	نعم	ربما	لا	ربما	ربما	ربما	لا	ربما	ربما	لا	ربما	ربما	ربما	ربما	ربما	لا	لا	ربما	نعم
أنثى	18-25 سنة	أعزب\عزباء	6000-12000 جنيه مصري	ريف	شهادات عليا	جامعة بكالوريوس /دبلوم	جامعة بكالوريوس /دبلوم	طالب	نعم	نعم	ليس لدي شريك	لا	نعم	أخرى	نعم	نعم	ربما	نعم	نعم	لا	لا	لا	لا	لا	لا	لا	لا	لا	ربما	لا	لا	لا	نعم	نعم	نعم	نعم	نعم	نعم	لا	لا
أنثى	18-25 سنة	أعزب\عزباء	6000-12000 جنيه مصري	ريف	جامعة بكالوريوس /دبلوم	جامعة بكالوريوس /دبلوم	جامعة بكالوريوس /دبلوم	طالب	نعم	لا	لا	لا	نعم	الإنترنت	نعم	نعم	ربما	ربما	نعم	لا	لا	لا	لا	لا	نعم	لا	لا	لا	ربما	لا	لا	نعم	نعم	نعم	نعم	نعم	لا	لا	ربما	ربما
أنثى	18-25 سنة	أعزب\عزباء	أقل من 6000 جنيه مصري	ريف	جامعة بكالوريوس /دبلوم	جامعة بكالوريوس /دبلوم	ابتدائي	عامل	لا	لا	نعم	لا	نعم	الأصدقاء, الصحف - الكتب - المجلات	نعم	نعم	لا	ربما	نعم	لا	لا	لا	لا	لا	لا	لا	نعم	لا	لا	لا	لا	لا	نعم	نعم	نعم	نعم	نعم	نعم	لا	لا
أنثى	18-25 سنة	أعزب\عزباء	6000-12000 جنيه مصري	ريف	جامعة بكالوريوس /دبلوم	جامعة بكالوريوس /دبلوم	جامعة بكالوريوس /دبلوم	طالب	نعم	لا	ليس لدي شريك	لا	نعم	الإنترنت	نعم	نعم	لا	لا	نعم	لا	لا	لا	لا	لا	ربما	لا	لا	لا	نعم	لا	لا	ربما	نعم	نعم	نعم	نعم	نعم	نعم	ربما	لا
أنثى	26-35 سنة	أعزب\عزباء	أقل من 6000 جنيه مصري	ريف	جامعة بكالوريوس /دبلوم	ابتدائي	ابتدائي	عامل	لا	لا	لا	لا	نعم	الإنترنت	نعم	نعم	ربما	ربما	لا	لا	لا	ربما	ربما	لا	ربما	لا	ربما	لا	لا	لا	لا	ربما	نعم	نعم	نعم	نعم	ربما	نعم	لا	لا
أنثى	18-25 سنة	أعزب\عزباء	6000-12000 جنيه مصري	مدينة	جامعة بكالوريوس /دبلوم	جامعة بكالوريوس /دبلوم	جامعة بكالوريوس /دبلوم	طالب	نعم	لا	ليس لدي شريك	لا	نعم	الطبيب	نعم	نعم	ربما	ربما	نعم	لا	لا	لا	لا	لا	ربما	ربما	ربما	لا	ربما	لا	لا	ربما	نعم	نعم	نعم	نعم	نعم	ربما	لا	لا
ذكر	18-25 سنة	أعزب\عزباء	أقل من 6000 جنيه مصري	ريف	جامعة بكالوريوس /دبلوم	جامعة بكالوريوس /دبلوم	شهادات عليا	طالب	نعم	لا	لا	لا	لا	الإنترنت, التلفاز, أخرى	نعم	لا	ربما	ربما	نعم	لا	لا	لا	لا	لا	لا	لا	نعم	لا	لا	لا	لا	لا	نعم	نعم	نعم	نعم	ربما	ربما	لا	لا
ذكر	18-25 سنة	أعزب\عزباء	أقل من 6000 جنيه مصري	ريف	جامعة بكالوريوس /دبلوم	جامعة بكالوريوس /دبلوم	جامعة بكالوريوس /دبلوم	طالب	لا	لا	ليس لدي شريك	لا	نعم	الصحف - الكتب - المجلات	نعم	لا	لا	لا	ربما	لا	لا	لا	لا	لا	لا	لا	نعم	لا	لا	لا	لا	لا	نعم	نعم	نعم	نعم	ربما	ربما	ربما	لا
أنثى	18-25 سنة	أعزب\عزباء	6000-12000 جنيه مصري	مدينة	جامعة بكالوريوس /دبلوم	جامعة بكالوريوس /دبلوم	جامعة بكالوريوس /دبلوم	طالب	نعم	لا	ليس لدي شريك	لا	نعم	الصحف - الكتب - المجلات	نعم	نعم	نعم	نعم	نعم	لا	لا	لا	لا	لا	ربما	لا	ربما	لا	ربما	لا	ربما	لا	نعم	نعم	نعم	نعم	ربما	ربما	لا	لا
أنثى	18-25 سنة	أعزب\عزباء	6000-12000 جنيه مصري	مدينة	ثانوي	شهادات عليا	شهادات عليا	طالب	نعم	لا	لا	لا	نعم	الأهل, أخرى	نعم	نعم	ربما	نعم	نعم	لا	لا	لا	لا	لا	لا	لا	ربما	لا	لا	لا	لا	نعم	نعم	نعم	نعم	نعم	نعم	نعم	لا	لا
أنثى	18-25 سنة	أعزب\عزباء	أقل من 6000 جنيه مصري	مدينة	جامعة بكالوريوس /دبلوم	ثانوي	ابتدائي	عامل	نعم	لا	ليس لدي شريك	لا	نعم	أخرى	لا	لا	لا	لا	نعم	لا	لا	لا	لا	لا	لا	لا	لا	لا	لا	لا	لا	لا	نعم	نعم	نعم	نعم	ربما	ربما	لا	لا
أنثى	18-25 سنة	أعزب\عزباء	6000-12000 جنيه مصري	ريف	جامعة بكالوريوس /دبلوم	جامعة بكالوريوس /دبلوم	جامعة بكالوريوس /دبلوم	طالب	لا	لا	ليس لدي شريك	لا	نعم	الإنترنت, الصحف - الكتب - المجلات, أخرى	نعم	نعم	لا	ربما	نعم	لا	لا	لا	لا	لا	ربما	لا	نعم	لا	نعم	لا	لا	ربما	نعم	نعم	نعم	نعم	نعم	نعم	لا	لا
أنثى	26-35 سنة	أعزب\عزباء	6000-12000 جنيه مصري	مدينة	جامعة بكالوريوس /دبلوم	شهادات عليا	جامعة بكالوريوس /دبلوم	عامل	لا	لا	لا	لا	نعم	الإنترنت, التلفاز, الأصدقاء	ربما	نعم	لا	لا	نعم	لا	لا	لا	لا	لا	ربما	لا	ربما	لا	لا	لا	لا	ربما	نعم	نعم	نعم	نعم	ربما	ربما	لا	لا
أنثى	18-25 سنة	أعزب\عزباء	6000-12000 جنيه مصري	مدينة	جامعة بكالوريوس /دبلوم	جامعة بكالوريوس /دبلوم	ثانوي	طالب	نعم	لا	ليس لدي شريك	لا	نعم	الإنترنت	نعم	نعم	لا	نعم	نعم	لا	لا	لا	لا	لا	نعم	لا	نعم	لا	ربما	لا	لا	ربما	نعم	نعم	نعم	نعم	ربما	ربما	لا	لا
أنثى	18-25 سنة	أعزب\عزباء	أقل من 6000 جنيه مصري	ريف	جامعة بكالوريوس /دبلوم	جامعة بكالوريوس /دبلوم	جامعة بكالوريوس /دبلوم	طالب	نعم	لا	ليس لدي شريك	لا	نعم	الأصدقاء	نعم	نعم	نعم	نعم	نعم	لا	لا	لا	لا	لا	لا	لا	لا	لا	لا	لا	لا	نعم	نعم	نعم	نعم	نعم	نعم	نعم	نعم	لا
أنثى	18-25 سنة	أعزب\عزباء	أقل من 6000 جنيه مصري	ريف	جامعة بكالوريوس /دبلوم	جامعة بكالوريوس /دبلوم	جامعة بكالوريوس /دبلوم	طالب	نعم	لا	ليس لدي شريك	لا	نعم	الإنترنت	نعم	ربما	ربما	ربما	نعم	لا	لا	ربما	لا	ربما	ربما	لا	لا	لا	ربما	لا	لا	نعم	نعم	نعم	نعم	ربما	لا	لا	لا	لا
أنثى	18-25 سنة	أعزب\عزباء	أقل من 6000 جنيه مصري	ريف	جامعة بكالوريوس /دبلوم	جامعة بكالوريوس /دبلوم	جامعة بكالوريوس /دبلوم	طالب	نعم	لا	ليس لدي شريك	لا	نعم	أخرى	نعم	لا	نعم	ربما	نعم	لا	لا	لا	لا	لا	لا	لا	نعم	لا	لا	لا	لا	لا	نعم	نعم	نعم	نعم	نعم	ربما	لا	لا
أنثى	18-25 سنة	متزوج/ة	6000-12000 جنيه مصري	مدينة	جامعة بكالوريوس /دبلوم	جامعة بكالوريوس /دبلوم	جامعة بكالوريوس /دبلوم	مربية منزل	لا	لا	لا	لا	نعم	الإنترنت	نعم	نعم	ربما	نعم	نعم	لا	لا	لا	لا	لا	نعم	لا	ربما	لا	لا	لا	لا	لا	نعم	نعم	نعم	نعم	نعم	نعم	لا	لا
أنثى	18-25 سنة	أعزب\عزباء	أكثر من 12000 جنيه مصري	مدينة	جامعة بكالوريوس /دبلوم	جامعة بكالوريوس /دبلوم	جامعة بكالوريوس /دبلوم	طالب	نعم	لا	ليس لدي شريك	لا	نعم	الإنترنت, الصحف - الكتب - المجلات	نعم	ربما	ربما	لا	نعم	نعم	لا	نعم	لا	لا	لا	ربما	ربما	ربما	نعم	ربما	لا	ربما	ربما	لا	نعم	لا	لا	نعم	نعم	ربما
أنثى	18-25 سنة	أعزب\عزباء	أقل من 6000 جنيه مصري	مدينة	جامعة بكالوريوس /دبلوم	جامعة بكالوريوس /دبلوم	جامعة بكالوريوس /دبلوم	طالب	نعم	لا	ليس لدي شريك	لا	نعم	الإنترنت, المدرسة, الصحف - الكتب - المجلات	نعم	ربما	لا	ربما	نعم	لا	لا	لا	لا	لا	ربما	لا	نعم	لا	ربما	لا	لا	ربما	نعم	نعم	نعم	نعم	ربما	ربما	لا	لا
أنثى	26-35 سنة	متزوج/ة	6000-12000 جنيه مصري	ريف	جامعة بكالوريوس /دبلوم	ثانوي	ثانوي	مربية منزل	لا	لا	لا	لا	نعم	الإنترنت	نعم	ربما	لا	نعم	نعم	لا	لا	لا	لا	لا	ربما	لا	ربما	لا	لا	لا	لا	نعم	نعم	نعم	نعم	نعم	ربما	ربما	ربما	لا
ذكر	18-25 سنة	أعزب\عزباء	أكثر من 12000 جنيه مصري	ريف	جامعة بكالوريوس /دبلوم	جامعة بكالوريوس /دبلوم	ثانوي	طالب	لا	لا	ليس لدي شريك	لا	نعم	الإنترنت	ربما	ربما	ربما	ربما	ربما	لا	لا	لا	ربما	ربما	ربما	ربما	ربما	ربما	ربما	لا	ربما	ربما	نعم	نعم	نعم	ربما	ربما	نعم	ربما	لا
أنثى	26-35 سنة	أعزب\عزباء	6000-12000 جنيه مصري	مدينة	جامعة بكالوريوس /دبلوم	جامعة بكالوريوس /دبلوم	جامعة بكالوريوس /دبلوم	عامل	لا	نعم	ليس لدي شريك	لا	نعم	الإنترنت, التلفاز, الأهل, الطبيب	نعم	نعم	نعم	نعم	نعم	لا	لا	لا	لا	لا	نعم	لا	نعم	لا	ربما	لا	لا	ربما	نعم	نعم	نعم	نعم	لا	لا	لا	لا
ذكر	18-25 سنة	أعزب\عزباء	6000-12000 جنيه مصري	ريف	جامعة بكالوريوس /دبلوم	جامعة بكالوريوس /دبلوم	جامعة بكالوريوس /دبلوم	طالب	نعم	لا	ليس لدي شريك	لا	نعم	الأهل	نعم	ربما	ربما	نعم	نعم	لا	لا	لا	لا	لا	لا	ربما	ربما	ربما	ربما	لا	لا	ربما	نعم	نعم	نعم	نعم	نعم	نعم	ربما	لا
أنثى	18-25 سنة	أعزب\عزباء	6000-12000 جنيه مصري	ريف	جامعة بكالوريوس /دبلوم	جامعة بكالوريوس /دبلوم	جامعة بكالوريوس /دبلوم	طالب	نعم	لا	ليس لدي شريك	لا	نعم	الإنترنت, المدرسة, الصحف - الكتب - المجلات	نعم	نعم	نعم	ربما	نعم	لا	لا	لا	لا	لا	لا	لا	نعم	لا	ربما	لا	لا	ربما	نعم	نعم	نعم	نعم	نعم	ربما	لا	لا
أنثى	18-25 سنة	أعزب\عزباء	6000-12000 جنيه مصري	ريف	جامعة بكالوريوس /دبلوم	جامعة بكالوريوس /دبلوم	جامعة بكالوريوس /دبلوم	طالب	نعم	لا	ليس لدي شريك	لا	نعم	الإنترنت	نعم	ربما	لا	ربما	نعم	لا	لا	لا	لا	لا	ربما	لا	لا	ربما	لا	لا	لا	ربما	نعم	نعم	نعم	نعم	لا	لا	لا	لا
أنثى	18-25 سنة	أعزب\عزباء	6000-12000 جنيه مصري	مدينة	جامعة بكالوريوس /دبلوم	جامعة بكالوريوس /دبلوم	جامعة بكالوريوس /دبلوم	طالب	نعم	لا	ليس لدي شريك	لا	نعم	الإنترنت, التلفاز, الأهل, الصحف - الكتب - المجلات	نعم	ربما	لا	ربما	نعم	لا	لا	لا	لا	لا	لا	لا	ربما	لا	ربما	لا	لا	نعم	نعم	نعم	نعم	نعم	ربما	ربما	لا	لا
أنثى	18-25 سنة	أعزب\عزباء	6000-12000 جنيه مصري	ريف	جامعة بكالوريوس /دبلوم	جامعة بكالوريوس /دبلوم	جامعة بكالوريوس /دبلوم	طالب	لا	لا	ليس لدي شريك	لا	نعم	الصحف - الكتب - المجلات	نعم	ربما	نعم	ربما	ربما	ربما	لا	ربما	لا	لا	ربما	ربما	ربما	ربما	ربما	ربما	ربما	ربما	نعم	ربما	ربما	ربما	لا	لا	ربما	ربما
أنثى	18-25 سنة	متزوج/ة	أقل من 6000 جنيه مصري	مدينة	جامعة بكالوريوس /دبلوم	جامعة بكالوريوس /دبلوم	جامعة بكالوريوس /دبلوم	عاطل عن العمل	لا	لا	لا	لا	نعم	التلفاز	ربما	ربما	ربما	ربما	ربما	لا	لا	لا	لا	لا	لا	لا	ربما	ربما	ربما	ربما	لا	ربما	نعم	نعم	لا	لا	لا	لا	لا	لا
أنثى	18-25 سنة	أعزب\عزباء	6000-12000 جنيه مصري	مدينة	جامعة بكالوريوس /دبلوم	شهادات عليا	جامعة بكالوريوس /دبلوم	طالب	نعم	لا	ليس لدي شريك	لا	نعم	الإنترنت, التلفاز, المدرسة, الأهل, الأصدقاء, الصحف - الكتب - المجلات, الطبيب	نعم	ربما	ربما	ربما	نعم	لا	لا	لا	لا	لا	ربما	ربما	ربما	لا	ربما	لا	لا	ربما	نعم	نعم	نعم	نعم	لا	ربما	ربما	ربما
ذكر	18-25 سنة	أعزب\عزباء	6000-12000 جنيه مصري	مدينة	جامعة بكالوريوس /دبلوم	جامعة بكالوريوس /دبلوم	جامعة بكالوريوس /دبلوم	عامل	لا	لا	لا	لا	نعم	الأصدقاء	نعم	ربما	نعم	ربما	نعم	لا	لا	لا	ربما	نعم	نعم	ربما	نعم	ربما	ربما	نعم	نعم	لا	ربما	نعم	نعم	لا	لا	لا	نعم	نعم
ذكر	18-25 سنة	أعزب\عزباء	6000-12000 جنيه مصري	مدينة	شهادات عليا	جامعة بكالوريوس /دبلوم	جامعة بكالوريوس /دبلوم	طالب	لا	لا	لا	لا	نعم	الإنترنت, أخرى	نعم	ربما	ربما	ربما	نعم	لا	لا	ربما	ربما	ربما	ربما	ربما	ربما	ربما	ربما	ربما	لا	لا	لا	نعم	نعم	ربما	لا	ربما	ربما	ربما
أنثى	26-35 سنة	أعزب\عزباء	6000-12000 جنيه مصري	ريف	جامعة بكالوريوس /دبلوم	جامعة بكالوريوس /دبلوم	جامعة بكالوريوس /دبلوم	عامل	نعم	لا	لا	لا	نعم	الإنترنت, التلفاز, الأهل	نعم	نعم	لا	نعم	نعم	لا	لا	لا	لا	لا	لا	لا	ربما	لا	ربما	لا	لا	لا	نعم	نعم	نعم	نعم	نعم	نعم	لا	لا
أنثى	18-25 سنة	أعزب\عزباء	أقل من 6000 جنيه مصري	مدينة	شهادات عليا	جامعة بكالوريوس /دبلوم	جامعة بكالوريوس /دبلوم	طالب	لا	لا	لا	لا	نعم	الإنترنت	ربما	لا	ربما	لا	ربما	لا	لا	لا	لا	لا	لا	لا	لا	لا	لا	لا	لا	لا	نعم	نعم	نعم	نعم	لا	نعم	لا	لا
أنثى	26-35 سنة	متزوج/ة	أقل من 6000 جنيه مصري	مدينة	جامعة بكالوريوس /دبلوم	ثانوي	ثانوي	مربية منزل	لا	لا	لا	لا	نعم	الأصدقاء	نعم	نعم	لا	ربما	نعم	لا	لا	لا	لا	لا	نعم	لا	ربما	ربما	لا	لا	لا	نعم	نعم	نعم	نعم	نعم	ربما	نعم	لا	لا
أنثى	18-25 سنة	أعزب\عزباء	6000-12000 جنيه مصري	مدينة	جامعة بكالوريوس /دبلوم	شهادات عليا	شهادات عليا	عامل	نعم	لا	ليس لدي شريك	لا	نعم	الإنترنت, التلفاز, الصحف - الكتب - المجلات	نعم	لا	ربما	لا	ربما	لا	لا	لا	لا	لا	لا	لا	نعم	لا	ربما	لا	لا	ربما	نعم	نعم	نعم	نعم	ربما	ربما	لا	لا
أنثى	18-25 سنة	أعزب\عزباء	6000-12000 جنيه مصري	مدينة	جامعة بكالوريوس /دبلوم	جامعة بكالوريوس /دبلوم	جامعة بكالوريوس /دبلوم	طالب	نعم	لا	ليس لدي شريك	لا	نعم	الإنترنت, التلفاز, الأهل	نعم	ربما	لا	لا	نعم	لا	لا	لا	لا	لا	ربما	لا	نعم	لا	ربما	لا	لا	ربما	ربما	نعم	نعم	نعم	نعم	نعم	لا	لا
أنثى	18-25 سنة	أعزب\عزباء	أقل من 6000 جنيه مصري	ريف	جامعة بكالوريوس /دبلوم	ثانوي	ثانوي	طالب	لا	لا	ليس لدي شريك	لا	نعم	الأهل	ربما	لا	نعم	ربما	نعم	لا	لا	لا	لا	لا	ربما	ربما	نعم	لا	ربما	لا	لا	ربما	نعم	نعم	نعم	نعم	نعم	نعم	لا	لا
أنثى	18-25 سنة	أعزب\عزباء	6000-12000 جنيه مصري	ريف	جامعة بكالوريوس /دبلوم	شهادات عليا	جامعة بكالوريوس /دبلوم	متقاعد	نعم	لا	ليس لدي شريك	لا	نعم	الإنترنت, التلفاز	نعم	ربما	ربما	ربما	نعم	لا	لا	ربما	لا	لا	لا	لا	ربما	لا	ربما	لا	ربما	ربما	نعم	نعم	نعم	نعم	نعم	نعم	لا	لا
أنثى	18-25 سنة	أعزب\عزباء	أقل من 6000 جنيه مصري	ريف	جامعة بكالوريوس /دبلوم	جامعة بكالوريوس /دبلوم	جامعة بكالوريوس /دبلوم	طالب	نعم	لا	ليس لدي شريك	لا	نعم	الإنترنت, التلفاز, أخرى	نعم	نعم	ربما	نعم	نعم	لا	لا	لا	لا	لا	لا	لا	نعم	لا	نعم	لا	لا	ربما	نعم	نعم	نعم	نعم	ربما	ربما	لا	لا
أنثى	18-25 سنة	أعزب\عزباء	أقل من 6000 جنيه مصري	مدينة	جامعة بكالوريوس /دبلوم	شهادات عليا	شهادات عليا	طالب	لا	لا	نعم	لا	نعم	الإنترنت, المدرسة, الأصدقاء, الطبيب	نعم	ربما	لا	لا	لا	نعم	لا	نعم	لا	لا	لا	لا	ربما	لا	ربما	لا	لا	لا	نعم	نعم	نعم	نعم	نعم	نعم	لا	لا
أنثى	18-25 سنة	أعزب\عزباء	6000-12000 جنيه مصري	ريف	جامعة بكالوريوس /دبلوم	شهادات عليا	شهادات عليا	طالب	نعم	نعم	ليس لدي شريك	لا	نعم	الأهل	نعم	ربما	لا	نعم	نعم	لا	لا	لا	لا	لا	لا	لا	لا	لا	ربما	ربما	لا	ربما	نعم	نعم	نعم	نعم	نعم	نعم	لا	لا
أنثى	18-25 سنة	أعزب\عزباء	6000-12000 جنيه مصري	ريف	جامعة بكالوريوس /دبلوم	جامعة بكالوريوس /دبلوم	جامعة بكالوريوس /دبلوم	عامل	نعم	لا	لا	لا	نعم	الإنترنت, التلفاز, المدرسة, الأهل, الأصدقاء, الصحف - الكتب - المجلات, الطبيب	نعم	نعم	ربما	ربما	ربما	لا	لا	لا	لا	لا	لا	لا	نعم	لا	ربما	لا	لا	ربما	نعم	نعم	نعم	نعم	ربما	ربما	لا	لا
أنثى	18-25 سنة	أعزب\عزباء	6000-12000 جنيه مصري	مدينة	جامعة بكالوريوس /دبلوم	شهادات عليا	جامعة بكالوريوس /دبلوم	عامل	لا	لا	لا	لا	نعم	الإنترنت	نعم	ربما	ربما	لا	نعم	لا	لا	ربما	لا	ربما	لا	لا	ربما	ربما	لا	لا	لا	نعم	نعم	نعم	نعم	ربما	ربما	ربما	ربما	لا
أنثى	18-25 سنة	أعزب\عزباء	أكثر من 12000 جنيه مصري	ريف	جامعة بكالوريوس /دبلوم	جامعة بكالوريوس /دبلوم	جامعة بكالوريوس /دبلوم	طالب	نعم	لا	ليس لدي شريك	لا	نعم	الإنترنت	نعم	نعم	نعم	ربما	نعم	لا	لا	لا	لا	لا	لا	لا	ربما	لا	ربما	لا	لا	لا	نعم	نعم	نعم	نعم	نعم	نعم	لا	لا
أنثى	18-25 سنة	أعزب\عزباء	6000-12000 جنيه مصري	ريف	جامعة بكالوريوس /دبلوم	جامعة بكالوريوس /دبلوم	جامعة بكالوريوس /دبلوم	طالب	نعم	لا	ليس لدي شريك	لا	نعم	الإنترنت, التلفاز, المدرسة, الأهل, الأصدقاء, الصحف - الكتب - المجلات	نعم	نعم	لا	نعم	ربما	لا	لا	لا	لا	لا	لا	لا	نعم	لا	ربما	لا	لا	نعم	نعم	ربما	نعم	ربما	لا	نعم	لا	لا
أنثى	18-25 سنة	أعزب\عزباء	أقل من 6000 جنيه مصري	ريف	ثانوي	جامعة بكالوريوس /دبلوم	جامعة بكالوريوس /دبلوم	طالب	نعم	لا	ليس لدي شريك	لا	نعم	الإنترنت	ربما	ربما	ربما	ربما	ربما	لا	ربما	ربما	ربما	ربما	ربما	ربما	ربما	ربما	ربما	ربما	ربما	ربما	ربما	ربما	ربما	ربما	ربما	ربما	ربما	ربما
أنثى	18-25 سنة	أعزب\عزباء	أكثر من 12000 جنيه مصري	ريف	جامعة بكالوريوس /دبلوم	شهادات عليا	جامعة بكالوريوس /دبلوم	طالب	نعم	لا	ليس لدي شريك	لا	نعم	أخرى	نعم	نعم	نعم	نعم	نعم	لا	لا	لا	لا	لا	لا	لا	نعم	لا	لا	لا	لا	لا	نعم	نعم	نعم	ربما	ربما	نعم	ربما	لا
ذكر	18-25 سنة	أعزب\عزباء	6000-12000 جنيه مصري	مدينة	جامعة بكالوريوس /دبلوم	جامعة بكالوريوس /دبلوم	جامعة بكالوريوس /دبلوم	طالب	نعم	لا	ليس لدي شريك	لا	لا	الإنترنت	ربما	ربما	ربما	ربما	ربما	ربما	لا	نعم	ربما	ربما	ربما	ربما	ربما	ربما	ربما	ربما	ربما	ربما	لا	لا	لا	ربما	ربما	ربما	ربما	ربما
أنثى	18-25 سنة	أعزب\عزباء	أكثر من 12000 جنيه مصري	مدينة	جامعة بكالوريوس /دبلوم	شهادات عليا	شهادات عليا	طالب	نعم	نعم	ليس لدي شريك	لا	نعم	أخرى	نعم	نعم	لا	نعم	نعم	ربما	ربما	نعم	لا	لا	ربما	ربما	ربما	لا	نعم	لا	لا	نعم	نعم	نعم	ربما	ربما	ربما	ربما	ربما	لا
أنثى	18-25 سنة	أعزب\عزباء	أقل من 6000 جنيه مصري	ريف	جامعة بكالوريوس /دبلوم	جامعة بكالوريوس /دبلوم	شهادات عليا	مربية منزل	نعم	لا	ليس لدي شريك	لا	لا	أخرى	ربما	ربما	ربما	ربما	ربما	لا	لا	ربما	ربما	ربما	ربما	ربما	ربما	ربما	ربما	ربما	ربما	ربما	ربما	ربما	ربما	نعم	نعم	ربما	ربما	ربما
أنثى	18-25 سنة	أعزب\عزباء	6000-12000 جنيه مصري	مدينة	جامعة بكالوريوس /دبلوم	شهادات عليا	جامعة بكالوريوس /دبلوم	طالب	لا	لا	ليس لدي شريك	لا	نعم	الإنترنت, التلفاز	نعم	نعم	لا	نعم	ربما	لا	لا	لا	لا	لا	ربما	لا	ربما	لا	ربما	لا	لا	ربما	نعم	نعم	نعم	نعم	ربما	ربما	لا	لا
أنثى	18-25 سنة	أعزب\عزباء	6000-12000 جنيه مصري	ريف	جامعة بكالوريوس /دبلوم	شهادات عليا	جامعة بكالوريوس /دبلوم	طالب	نعم	لا	ليس لدي شريك	لا	نعم	الإنترنت, المدرسة, الأصدقاء, الطبيب	نعم	ربما	ربما	نعم	نعم	ربما	لا	لا	لا	ربما	ربما	لا	ربما	لا	ربما	لا	لا	نعم	نعم	نعم	نعم	نعم	نعم	نعم	نعم	ربما
أنثى	18-25 سنة	متزوج/ة	أكثر من 12000 جنيه مصري	مدينة	جامعة بكالوريوس /دبلوم	جامعة بكالوريوس /دبلوم	ابتدائي	مربية منزل	لا	لا	لا	لا	نعم	الإنترنت	ربما	نعم	ربما	نعم	ربما	ربما	ربما	ربما	ربما	ربما	ربما	ربما	ربما	ربما	ربما	ربما	ربما	نعم	ربما	نعم	نعم	نعم	ربما	ربما	ربما	ربما
أنثى	18-25 سنة	أعزب\عزباء	أقل من 6000 جنيه مصري	ريف	جامعة بكالوريوس /دبلوم	جامعة بكالوريوس /دبلوم	ابتدائي	طالب	نعم	لا	لا	لا	نعم	أخرى	نعم	نعم	نعم	نعم	نعم	لا	لا	لا	لا	ربما	نعم	نعم	ربما	ربما	ربما	ربما	لا	ربما	نعم	نعم	نعم	نعم	ربما	ربما	ربما	لا
أنثى	18-25 سنة	أعزب\عزباء	6000-12000 جنيه مصري	ريف	جامعة بكالوريوس /دبلوم	جامعة بكالوريوس /دبلوم	جامعة بكالوريوس /دبلوم	طالب	نعم	لا	ليس لدي شريك	لا	نعم	الإنترنت	نعم	نعم	نعم	ربما	نعم	لا	لا	لا	لا	لا	لا	لا	ربما	لا	لا	لا	لا	نعم	نعم	نعم	نعم	نعم	ربما	نعم	لا	لا
أنثى	18-25 سنة	أعزب\عزباء	أقل من 6000 جنيه مصري	ريف	جامعة بكالوريوس /دبلوم	جامعة بكالوريوس /دبلوم	جامعة بكالوريوس /دبلوم	طالب	لا	لا	لا	لا	نعم	الإنترنت, التلفاز, الطبيب, أخرى	نعم	نعم	نعم	نعم	نعم	لا	لا	لا	لا	لا	نعم	لا	نعم	ربما	لا	لا	لا	ربما	نعم	نعم	نعم	ربما	ربما	ربما	ربما	لا
أنثى	18-25 سنة	أعزب\عزباء	أقل من 6000 جنيه مصري	ريف	ثانوي	جامعة بكالوريوس /دبلوم	جامعة بكالوريوس /دبلوم	طالب	نعم	لا	لا	لا	نعم	الإنترنت, التلفاز	ربما	نعم	نعم	ربما	نعم	لا	لا	لا	ربما	لا	ربما	لا	ربما	لا	ربما	لا	لا	لا	لا	نعم	لا	ربما	ربما	ربما	لا	لا
أنثى	18-25 سنة	أعزب\عزباء	6000-12000 جنيه مصري	ريف	جامعة بكالوريوس /دبلوم	جامعة بكالوريوس /دبلوم	جامعة بكالوريوس /دبلوم	طالب	نعم	لا	ليس لدي شريك	لا	نعم	الأهل	نعم	لا	نعم	ربما	نعم	لا	لا	لا	لا	لا	لا	لا	نعم	لا	ربما	لا	لا	لا	نعم	ربما	ربما	ربما	لا	لا	ربما	ربما
أنثى	18-25 سنة	أعزب\عزباء	6000-12000 جنيه مصري	ريف	جامعة بكالوريوس /دبلوم	جامعة بكالوريوس /دبلوم	جامعة بكالوريوس /دبلوم	طالب	لا	لا	ليس لدي شريك	لا	نعم	الإنترنت, التلفاز, الصحف - الكتب - المجلات	نعم	ربما	ربما	نعم	نعم	لا	لا	لا	لا	لا	ربما	ربما	ربما	ربما	ربما	لا	لا	لا	نعم	نعم	نعم	نعم	نعم	نعم	لا	لا
أنثى	18-25 سنة	أعزب\عزباء	أكثر من 12000 جنيه مصري	مدينة	جامعة بكالوريوس /دبلوم	شهادات عليا	شهادات عليا	طالب	نعم	لا	ليس لدي شريك	لا	نعم	الإنترنت, الأصدقاء	نعم	نعم	نعم	نعم	نعم	لا	لا	لا	لا	لا	لا	لا	لا	لا	لا	لا	لا	نعم	نعم	نعم	نعم	نعم	نعم	نعم	لا	لا
أنثى	18-25 سنة	أعزب\عزباء	أقل من 6000 جنيه مصري	مدينة	جامعة بكالوريوس /دبلوم	جامعة بكالوريوس /دبلوم	ثانوي	طالب	لا	لا	ليس لدي شريك	لا	نعم	الإنترنت, التلفاز, الصحف - الكتب - المجلات, أخرى	نعم	نعم	لا	نعم	نعم	لا	لا	لا	لا	لا	نعم	نعم	نعم	لا	لا	لا	لا	لا	نعم	نعم	نعم	نعم	ربما	ربما	لا	لا
أنثى	26-35 سنة	أعزب\عزباء	أكثر من 12000 جنيه مصري	مدينة	شهادات عليا	شهادات عليا	شهادات عليا	عامل	نعم	نعم	ليس لدي شريك	لا	نعم	أخرى	نعم	نعم	لا	نعم	نعم	لا	لا	لا	لا	لا	نعم	لا	نعم	لا	ربما	لا	لا	نعم	نعم	نعم	نعم	نعم	ربما	نعم	لا	لا
أنثى	18-25 سنة	أعزب\عزباء	6000-12000 جنيه مصري	مدينة	جامعة بكالوريوس /دبلوم	جامعة بكالوريوس /دبلوم	جامعة بكالوريوس /دبلوم	طالب	نعم	لا	ليس لدي شريك	لا	نعم	الإنترنت, المدرسة, الأصدقاء, الطبيب	نعم	نعم	نعم	نعم	نعم	لا	لا	لا	لا	لا	نعم	لا	نعم	لا	لا	لا	لا	ربما	نعم	نعم	نعم	نعم	ربما	نعم	لا	لا
أنثى	18-25 سنة	أعزب\عزباء	أكثر من 12000 جنيه مصري	مدينة	جامعة بكالوريوس /دبلوم	جامعة بكالوريوس /دبلوم	جامعة بكالوريوس /دبلوم	طالب	نعم	لا	ليس لدي شريك	لا	نعم	الإنترنت, التلفاز, الصحف - الكتب - المجلات, أخرى	نعم	نعم	ربما	ربما	نعم	لا	لا	لا	لا	لا	لا	لا	نعم	لا	ربما	لا	لا	لا	نعم	نعم	نعم	نعم	لا	لا	لا	لا
ذكر	18-25 سنة	أعزب\عزباء	6000-12000 جنيه مصري	مدينة	جامعة بكالوريوس /دبلوم	جامعة بكالوريوس /دبلوم	جامعة بكالوريوس /دبلوم	طالب	لا	لا	لا	لا	لا	أخرى	ربما	نعم	نعم	نعم	نعم	لا	لا	لا	لا	لا	ربما	لا	ربما	لا	ربما	ربما	لا	لا	نعم	نعم	نعم	نعم	ربما	ربما	لا	لا
ذكر	18-25 سنة	أعزب\عزباء	6000-12000 جنيه مصري	مدينة	جامعة بكالوريوس /دبلوم	جامعة بكالوريوس /دبلوم	جامعة بكالوريوس /دبلوم	طالب	نعم	لا	ليس لدي شريك	لا	لا	التلفاز	ربما	نعم	لا	ربما	نعم	لا	لا	لا	لا	لا	نعم	ربما	ربما	لا	ربما	لا	لا	ربما	نعم	نعم	نعم	نعم	لا	لا	نعم	لا
أنثى	18-25 سنة	أعزب\عزباء	أقل من 6000 جنيه مصري	ريف	جامعة بكالوريوس /دبلوم	جامعة بكالوريوس /دبلوم	جامعة بكالوريوس /دبلوم	طالب	لا	لا	لا	لا	نعم	الإنترنت, الأهل	نعم	نعم	لا	ربما	نعم	لا	لا	لا	لا	لا	ربما	لا	نعم	لا	لا	لا	لا	ربما	نعم	نعم	نعم	نعم	ربما	نعم	لا	لا
أنثى	18-25 سنة	أعزب\عزباء	6000-12000 جنيه مصري	مدينة	جامعة بكالوريوس /دبلوم	شهادات عليا	جامعة بكالوريوس /دبلوم	طالب	نعم	لا	لا	لا	نعم	الإنترنت, التلفاز, الأصدقاء	نعم	ربما	ربما	ربما	نعم	لا	لا	لا	لا	لا	ربما	لا	ربما	لا	ربما	لا	لا	ربما	نعم	نعم	نعم	نعم	ربما	ربما	لا	لا
أنثى	18-25 سنة	أعزب\عزباء	6000-12000 جنيه مصري	ريف	جامعة بكالوريوس /دبلوم	ثانوي	ثانوي	طالب	نعم	لا	ليس لدي شريك	لا	نعم	الإنترنت, المدرسة, الصحف - الكتب - المجلات	نعم	نعم	نعم	نعم	نعم	لا	لا	لا	لا	لا	لا	لا	ربما	لا	لا	لا	ربما	ربما	نعم	نعم	نعم	نعم	ربما	نعم	لا	لا
أنثى	18-25 سنة	أعزب\عزباء	أكثر من 12000 جنيه مصري	ريف	جامعة بكالوريوس /دبلوم	جامعة بكالوريوس /دبلوم	جامعة بكالوريوس /دبلوم	طالب	نعم	لا	ليس لدي شريك	لا	نعم	الإنترنت, المدرسة, الأهل, الأصدقاء	نعم	ربما	نعم	ربما	نعم	لا	لا	لا	لا	لا	ربما	لا	ربما	لا	ربما	لا	لا	ربما	نعم	نعم	نعم	نعم	نعم	نعم	لا	لا
أنثى	18-25 سنة	أعزب\عزباء	أقل من 6000 جنيه مصري	ريف	ثانوي	ابتدائي	ثانوي	طالب	نعم	لا	ليس لدي شريك	لا	نعم	الإنترنت, المدرسة, أخرى	نعم	ربما	نعم	ربما	نعم	لا	لا	لا	لا	ربما	ربما	ربما	ربما	ربما	ربما	لا	ربما	ربما	نعم	نعم	نعم	نعم	لا	ربما	لا	لا
أنثى	18-25 سنة	أعزب\عزباء	أكثر من 12000 جنيه مصري	ريف	جامعة بكالوريوس /دبلوم	جامعة بكالوريوس /دبلوم	جامعة بكالوريوس /دبلوم	طالب	نعم	لا	ليس لدي شريك	لا	نعم	الإنترنت, التلفاز, الأهل, الطبيب	نعم	نعم	ربما	ربما	نعم	لا	لا	لا	لا	لا	لا	لا	ربما	لا	لا	لا	لا	نعم	نعم	نعم	نعم	نعم	نعم	نعم	لا	لا
ذكر	18-25 سنة	أعزب\عزباء	أكثر من 12000 جنيه مصري	مدينة	جامعة بكالوريوس /دبلوم	جامعة بكالوريوس /دبلوم	جامعة بكالوريوس /دبلوم	طالب	نعم	لا	ليس لدي شريك	لا	نعم	الأهل, أخرى	نعم	نعم	نعم	ربما	نعم	لا	لا	لا	لا	لا	ربما	لا	نعم	لا	نعم	ربما	لا	لا	نعم	نعم	نعم	نعم	ربما	نعم	لا	لا
ذكر	36-50 سنة	متزوج/ة	أقل من 6000 جنيه مصري	ريف	جامعة بكالوريوس /دبلوم	ثانوي	ثانوي	عامل	لا	لا	لا	لا	نعم	الإنترنت, التلفاز, المدرسة, الأهل, الأصدقاء	نعم	نعم	نعم	نعم	نعم	لا	لا	لا	لا	لا	نعم	لا	نعم	لا	لا	لا	لا	نعم	نعم	نعم	نعم	نعم	ربما	نعم	نعم	لا
ذكر	18-25 سنة	أعزب\عزباء	أكثر من 12000 جنيه مصري	مدينة	جامعة بكالوريوس /دبلوم	جامعة بكالوريوس /دبلوم	جامعة بكالوريوس /دبلوم	طالب	نعم	لا	لا	لا	نعم	الإنترنت, الطبيب	نعم	نعم	نعم	نعم	نعم	لا	لا	لا	لا	لا	لا	لا	ربما	لا	ربما	لا	لا	ربما	نعم	نعم	نعم	نعم	نعم	نعم	لا	لا
ذكر	18-25 سنة	أعزب\عزباء	6000-12000 جنيه مصري	مدينة	جامعة بكالوريوس /دبلوم	جامعة بكالوريوس /دبلوم	جامعة بكالوريوس /دبلوم	عاطل عن العمل	لا	لا	ليس لدي شريك	لا	نعم	الإنترنت, التلفاز, المدرسة, الأهل, الأصدقاء, الصحف - الكتب - المجلات, الطبيب, أخرى	نعم	لا	لا	لا	نعم	لا	لا	لا	لا	لا	لا	لا	لا	لا	لا	لا	لا	ربما	نعم	نعم	نعم	نعم	نعم	نعم	لا	لا
ذكر	26-35 سنة	أعزب\عزباء	6000-12000 جنيه مصري	مدينة	جامعة بكالوريوس /دبلوم	جامعة بكالوريوس /دبلوم	جامعة بكالوريوس /دبلوم	عامل	نعم	لا	لا	لا	نعم	أخرى	نعم	لا	لا	ربما	نعم	لا	لا	لا	لا	لا	لا	لا	نعم	لا	لا	لا	لا	ربما	نعم	نعم	نعم	نعم	نعم	نعم	لا	لا
أنثى	18-25 سنة	أعزب\عزباء	أكثر من 12000 جنيه مصري	مدينة	جامعة بكالوريوس /دبلوم	جامعة بكالوريوس /دبلوم	جامعة بكالوريوس /دبلوم	عامل	نعم	لا	ليس لدي شريك	لا	نعم	الإنترنت, التلفاز, المدرسة, الأهل, الأصدقاء, الصحف - الكتب - المجلات	نعم	نعم	لا	نعم	نعم	لا	لا	لا	لا	لا	لا	لا	ربما	لا	ربما	ربما	لا	ربما	نعم	نعم	نعم	نعم	نعم	نعم	لا	لا
ذكر	26-35 سنة	أعزب\عزباء	أقل من 6000 جنيه مصري	ريف	جامعة بكالوريوس /دبلوم	جامعة بكالوريوس /دبلوم	جامعة بكالوريوس /دبلوم	عامل	نعم	لا	ليس لدي شريك	لا	نعم	الإنترنت, الصحف - الكتب - المجلات, الطبيب	نعم	نعم	لا	ربما	نعم	لا	لا	لا	لا	لا	لا	لا	ربما	لا	لا	لا	لا	ربما	نعم	نعم	نعم	نعم	نعم	نعم	لا	لا
ذكر	51 سنة فأكثر	متزوج/ة	6000-12000 جنيه مصري	مدينة	جامعة بكالوريوس /دبلوم	ابتدائي	ابتدائي	عامل	لا	لا	لا	لا	نعم	الإنترنت, الأهل	نعم	ربما	لا	ربما	نعم	ربما	ربما	ربما	ربما	نعم	ربما	ربما	ربما	ربما	ربما	لا	لا	ربما	نعم	نعم	نعم	نعم	ربما	ربما	لا	لا
ذكر	36-50 سنة	متزوج/ة	أكثر من 12000 جنيه مصري	مدينة	جامعة بكالوريوس /دبلوم	ابتدائي	ابتدائي	عامل	نعم	لا	لا	لا	نعم	الصحف - الكتب - المجلات	نعم	نعم	نعم	نعم	نعم	لا	لا	لا	لا	لا	لا	لا	نعم	لا	لا	لا	لا	نعم	نعم	نعم	نعم	نعم	نعم	نعم	لا	لا
أنثى	51 سنة فأكثر	متزوج/ة	6000-12000 جنيه مصري	مدينة	جامعة بكالوريوس /دبلوم	ابتدائي	ابتدائي	متقاعد	لا	لا	لا	لا	نعم	الإنترنت, التلفاز, الأهل, الأصدقاء, الطبيب	نعم	ربما	لا	ربما	نعم	لا	لا	لا	لا	ربما	ربما	ربما	ربما	ربما	ربما	ربما	لا	نعم	نعم	نعم	نعم	نعم	ربما	لا	ربما	لا
ذكر	18-25 سنة	أعزب\عزباء	أكثر من 12000 جنيه مصري	ريف	شهادات عليا	شهادات عليا	جامعة بكالوريوس /دبلوم	عامل	نعم	لا	لا	لا	نعم	أخرى	نعم	نعم	ربما	نعم	نعم	لا	لا	لا	لا	لا	نعم	ربما	نعم	ربما	ربما	لا	لا	نعم	نعم	نعم	نعم	نعم	ربما	ربما	ربما	لا
ذكر	26-35 سنة	متزوج/ة	6000-12000 جنيه مصري	مدينة	شهادات عليا	شهادات عليا	شهادات عليا	عامل	لا	لا	لا	لا	نعم	الإنترنت, الأهل, الطبيب	نعم	ربما	لا	ربما	نعم	لا	لا	ربما	ربما	نعم	ربما	لا	نعم	لا	ربما	لا	لا	ربما	نعم	نعم	نعم	نعم	نعم	نعم	لا	لا
ذكر	18-25 سنة	أعزب\عزباء	أقل من 6000 جنيه مصري	ريف	جامعة بكالوريوس /دبلوم	ابتدائي	ابتدائي	طالب	لا	لا	ليس لدي شريك	لا	نعم	الإنترنت, التلفاز, المدرسة, الأهل, الأصدقاء, الصحف - الكتب - المجلات	نعم	نعم	لا	ربما	نعم	لا	لا	لا	لا	لا	ربما	لا	لا	لا	ربما	لا	لا	لا	نعم	نعم	نعم	نعم	ربما	ربما	ربما	لا
ذكر	18-25 سنة	أعزب\عزباء	6000-12000 جنيه مصري	مدينة	جامعة بكالوريوس /دبلوم	جامعة بكالوريوس /دبلوم	جامعة بكالوريوس /دبلوم	عامل	لا	لا	ليس لدي شريك	لا	نعم	الإنترنت, التلفاز, المدرسة, الأهل, الأصدقاء, الطبيب	نعم	نعم	ربما	نعم	نعم	لا	لا	لا	لا	لا	لا	لا	لا	لا	ربما	ربما	لا	لا	نعم	نعم	نعم	ربما	لا	لا	ربما	لا
ذكر	18-25 سنة	أعزب\عزباء	أكثر من 12000 جنيه مصري	مدينة	جامعة بكالوريوس /دبلوم	جامعة بكالوريوس /دبلوم	جامعة بكالوريوس /دبلوم	طالب	لا	لا	لا	لا	نعم	الطبيب	نعم	نعم	لا	لا	نعم	لا	ربما	لا	لا	لا	لا	لا	ربما	لا	لا	لا	لا	ربما	نعم	نعم	نعم	نعم	نعم	نعم	لا	لا
أنثى	36-50 سنة	متزوج/ة	أكثر من 12000 جنيه مصري	مدينة	جامعة بكالوريوس /دبلوم	جامعة بكالوريوس /دبلوم	جامعة بكالوريوس /دبلوم	عامل	لا	لا	لا	لا	نعم	الأهل	نعم	نعم	لا	نعم	نعم	لا	لا	لا	لا	لا	نعم	لا	نعم	لا	لا	لا	لا	لا	نعم	نعم	نعم	نعم	نعم	نعم	لا	لا
ذكر	18-25 سنة	أعزب\عزباء	6000-12000 جنيه مصري	ريف	جامعة بكالوريوس /دبلوم	ثانوي	ثانوي	طالب	نعم	نعم	لا	لا	نعم	الإنترنت, الأهل	نعم	نعم	نعم	نعم	نعم	لا	لا	لا	لا	لا	نعم	نعم	نعم	لا	لا	لا	لا	لا	نعم	نعم	نعم	نعم	لا	لا	نعم	لا
ذكر	26-35 سنة	متزوج/ة	أكثر من 12000 جنيه مصري	مدينة	جامعة بكالوريوس /دبلوم	ابتدائي	ابتدائي	عامل	نعم	لا	لا	لا	لا	الأهل	ربما	ربما	ربما	ربما	ربما	ربما	ربما	ربما	ربما	ربما	ربما	ربما	ربما	ربما	ربما	ربما	ربما	ربما	ربما	ربما	ربما	ربما	ربما	ربما	ربما	ربما
ذكر	18-25 سنة	أعزب\عزباء	6000-12000 جنيه مصري	مدينة	جامعة بكالوريوس /دبلوم	جامعة بكالوريوس /دبلوم	جامعة بكالوريوس /دبلوم	عامل	نعم	لا	لا	لا	نعم	الإنترنت, التلفاز, المدرسة, الأهل, الأصدقاء, الصحف - الكتب - المجلات, الطبيب, أخرى	لا	نعم	لا	نعم	نعم	لا	لا	لا	لا	نعم	نعم	لا	ربما	لا	نعم	لا	لا	نعم	نعم	نعم	نعم	ربما	ربما	ربما	ربما	ربما
ذكر	18-25 سنة	أعزب\عزباء	6000-12000 جنيه مصري	مدينة	شهادات عليا	شهادات عليا	جامعة بكالوريوس /دبلوم	طالب	نعم	لا	ليس لدي شريك	لا	نعم	الأهل, الأصدقاء	نعم	نعم	ربما	لا	نعم	لا	لا	لا	لا	لا	لا	لا	ربما	لا	لا	لا	لا	لا	نعم	نعم	نعم	نعم	نعم	نعم	لا	لا
ذكر	18-25 سنة	أعزب\عزباء	6000-12000 جنيه مصري	مدينة	جامعة بكالوريوس /دبلوم	جامعة بكالوريوس /دبلوم	جامعة بكالوريوس /دبلوم	عامل	نعم	لا	لا	لا	نعم	الطبيب	نعم	نعم	ربما	ربما	نعم	لا	لا	لا	لا	ربما	لا	لا	ربما	لا	ربما	لا	لا	ربما	نعم	نعم	نعم	نعم	نعم	نعم	لا	لا
ذكر	18-25 سنة	أعزب\عزباء	6000-12000 جنيه مصري	ريف	جامعة بكالوريوس /دبلوم	جامعة بكالوريوس /دبلوم	ثانوي	طالب	نعم	نعم	لا	لا	نعم	الأصدقاء	نعم	لا	لا	لا	نعم	نعم	لا	لا	لا	نعم	لا	نعم	نعم	لا	لا	لا	لا	نعم	لا	نعم	نعم	ربما	ربما	ربما	لا	ربما
ذكر	18-25 سنة	أعزب\عزباء	6000-12000 جنيه مصري	مدينة	جامعة بكالوريوس /دبلوم	جامعة بكالوريوس /دبلوم	جامعة بكالوريوس /دبلوم	عامل	نعم	لا	لا	لا	نعم	الإنترنت, المدرسة, الأهل, الأصدقاء	نعم	نعم	نعم	ربما	نعم	لا	لا	لا	لا	لا	ربما	لا	نعم	لا	لا	لا	لا	نعم	نعم	نعم	نعم	ربما	ربما	ربما	لا	لا
أنثى	18-25 سنة	متزوج/ة	6000-12000 جنيه مصري	مدينة	جامعة بكالوريوس /دبلوم	جامعة بكالوريوس /دبلوم	جامعة بكالوريوس /دبلوم	طالب	نعم	لا	لا	لا	نعم	الإنترنت, الصحف - الكتب - المجلات	نعم	نعم	لا	نعم	نعم	لا	لا	لا	لا	لا	لا	لا	نعم	لا	لا	لا	لا	نعم	نعم	نعم	نعم	نعم	نعم	نعم	لا	لا
ذكر	18-25 سنة	أعزب\عزباء	6000-12000 جنيه مصري	ريف	جامعة بكالوريوس /دبلوم	جامعة بكالوريوس /دبلوم	جامعة بكالوريوس /دبلوم	طالب	نعم	لا	ليس لدي شريك	لا	نعم	الصحف - الكتب - المجلات	نعم	نعم	ربما	ربما	نعم	لا	لا	لا	لا	لا	لا	لا	لا	لا	نعم	لا	لا	ربما	نعم	نعم	ربما	لا	لا	لا	لا	لا
ذكر	18-25 سنة	أعزب\عزباء	أكثر من 12000 جنيه مصري	مدينة	جامعة بكالوريوس /دبلوم	جامعة بكالوريوس /دبلوم	جامعة بكالوريوس /دبلوم	طالب	نعم	لا	ليس لدي شريك	لا	نعم	أخرى	نعم	نعم	ربما	ربما	نعم	لا	لا	لا	لا	لا	ربما	ربما	ربما	ربما	ربما	لا	لا	ربما	نعم	نعم	نعم	نعم	نعم	ربما	لا	لا
ذكر	18-25 سنة	أعزب\عزباء	6000-12000 جنيه مصري	ريف	شهادات عليا	شهادات عليا	شهادات عليا	عامل	نعم	لا	لا	لا	نعم	أخرى	نعم	لا	نعم	نعم	نعم	ربما	لا	نعم	لا	نعم	نعم	لا	نعم	نعم	نعم	لا	لا	نعم	نعم	نعم	نعم	نعم	نعم	نعم	نعم	لا
ذكر	18-25 سنة	أعزب\عزباء	أكثر من 12000 جنيه مصري	مدينة	جامعة بكالوريوس /دبلوم	جامعة بكالوريوس /دبلوم	جامعة بكالوريوس /دبلوم	عامل	نعم	لا	نعم	لا	نعم	الإنترنت, التلفاز, الأهل, الأصدقاء, الطبيب, أخرى	نعم	نعم	نعم	نعم	نعم	لا	لا	لا	لا	لا	لا	لا	نعم	لا	ربما	ربما	ربما	لا	نعم	نعم	نعم	نعم	ربما	ربما	لا	لا
أنثى	18-25 سنة	أعزب\عزباء	6000-12000 جنيه مصري	مدينة	جامعة بكالوريوس /دبلوم	جامعة بكالوريوس /دبلوم	جامعة بكالوريوس /دبلوم	طالب	نعم	لا	ليس لدي شريك	لا	نعم	الإنترنت, التلفاز, المدرسة, الصحف - الكتب - المجلات, أخرى	نعم	نعم	ربما	نعم	نعم	لا	لا	لا	لا	لا	ربما	ربما	ربما	لا	لا	ربما	لا	لا	نعم	نعم	نعم	نعم	ربما	ربما	ربما	لا
أنثى	18-25 سنة	أعزب\عزباء	6000-12000 جنيه مصري	مدينة	جامعة بكالوريوس /دبلوم	جامعة بكالوريوس /دبلوم	جامعة بكالوريوس /دبلوم	عاطل عن العمل	نعم	لا	لا	لا	نعم	الإنترنت	نعم	لا	ربما	ربما	نعم	لا	لا	لا	لا	لا	ربما	لا	نعم	لا	ربما	لا	لا	ربما	نعم	نعم	نعم	نعم	نعم	نعم	لا	لا
ذكر	18-25 سنة	أعزب\عزباء	أكثر من 12000 جنيه مصري	مدينة	جامعة بكالوريوس /دبلوم	جامعة بكالوريوس /دبلوم	شهادات عليا	عامل	نعم	لا	ليس لدي شريك	لا	نعم	الإنترنت, التلفاز, المدرسة, الأهل, الأصدقاء, الصحف - الكتب - المجلات, الطبيب, أخرى	ربما	ربما	نعم	ربما	نعم	لا	لا	لا	لا	لا	ربما	ربما	ربما	ربما	ربما	لا	ربما	ربما	نعم	نعم	نعم	نعم	ربما	ربما	ربما	لا
أنثى	18-25 سنة	أعزب\عزباء	6000-12000 جنيه مصري	مدينة	جامعة بكالوريوس /دبلوم	جامعة بكالوريوس /دبلوم	جامعة بكالوريوس /دبلوم	طالب	نعم	لا	لا	لا	نعم	الإنترنت, الصحف - الكتب - المجلات	نعم	نعم	ربما	ربما	نعم	لا	لا	لا	لا	لا	لا	لا	ربما	لا	ربما	لا	لا	لا	نعم	نعم	نعم	نعم	ربما	ربما	ربما	لا
ذكر	18-25 سنة	متزوج/ة	أقل من 6000 جنيه مصري	ريف	جامعة بكالوريوس /دبلوم	جامعة بكالوريوس /دبلوم	جامعة بكالوريوس /دبلوم	عاطل عن العمل	لا	لا	نعم	لا	لا	الإنترنت, التلفاز	ربما	لا	نعم	نعم	لا	ربما	لا	لا	لا	لا	لا	لا	نعم	نعم	لا	لا	لا	لا	نعم	نعم	نعم	لا	لا	نعم	نعم	نعم
أنثى	26-35 سنة	متزوج/ة	6000-12000 جنيه مصري	مدينة	ثانوي	ثانوي	ثانوي	متقاعد	لا	لا	لا	نعم	نعم	التلفاز, المدرسة	ربما	لا	نعم	نعم	نعم	لا	لا	لا	نعم	نعم	لا	لا	نعم	لا	ربما	لا	لا	لا	لا	لا	لا	نعم	نعم	ربما	نعم	نعم
ذكر	26-35 سنة	أعزب\عزباء	6000-12000 جنيه مصري	ريف	ثانوي	جامعة بكالوريوس /دبلوم	ثانوي	عامل	لا	لا	نعم	نعم	نعم	الإنترنت	نعم	نعم	نعم	لا	نعم	نعم	لا	نعم	لا	لا	لا	نعم	نعم	لا	لا	لا	لا	ربما	نعم	لا	لا	ربما	لا	نعم	نعم	لا
ذكر	26-35 سنة	متزوج/ة	6000-12000 جنيه مصري	ريف	ثانوي	ثانوي	ثانوي	عاطل عن العمل	نعم	لا	نعم	نعم	نعم	الإنترنت	نعم	نعم	نعم	لا	لا	لا	لا	لا	نعم	نعم	لا	نعم	نعم	لا	لا	نعم	لا	نعم	نعم	لا	لا	ربما	ربما	لا	ربما	ربما
ذكر	26-35 سنة	أعزب\عزباء	6000-12000 جنيه مصري	ريف	جامعة بكالوريوس /دبلوم	ثانوي	ابتدائي	مربية منزل	لا	نعم	ليس لدي شريك	نعم	نعم	الإنترنت	نعم	لا	نعم	لا	نعم	لا	لا	نعم	نعم	لا	نعم	نعم	نعم	لا	نعم	نعم	لا	لا	لا	لا	لا	نعم	نعم	نعم	نعم	لا
ذكر	18-25 سنة	متزوج/ة	6000-12000 جنيه مصري	ريف	جامعة بكالوريوس /دبلوم	ثانوي	ثانوي	عاطل عن العمل	نعم	نعم	ليس لدي شريك	نعم	لا	المدرسة	لا	لا	ربما	ربما	نعم	لا	ربما	لا	نعم	لا	لا	لا	ربما	نعم	نعم	نعم	نعم	نعم	نعم	نعم	نعم	نعم	نعم	نعم	نعم	نعم
ذكر	18-25 سنة	أعزب\عزباء	6000-12000 جنيه مصري	ريف	شهادات عليا	ثانوي	ثانوي	متقاعد	لا	لا	لا	لا	نعم	التلفاز	ربما	نعم	لا	نعم	لا	لا	لا	لا	لا	لا	لا	نعم	لا	لا	ربما	ربما	ربما	ربما	نعم	نعم	نعم	نعم	نعم	نعم	لا	لا
ذكر	26-35 سنة	أعزب\عزباء	6000-12000 جنيه مصري	ريف	ابتدائي	جامعة بكالوريوس /دبلوم	ثانوي	عامل	نعم	لا	لا	نعم	لا	التلفاز	نعم	نعم	نعم	نعم	لا	لا	لا	نعم	نعم	نعم	نعم	لا	نعم	لا	لا	لا	نعم	نعم	لا	لا	نعم	لا	لا	لا	لا	نعم
ذكر	18-25 سنة	أعزب\عزباء	6000-12000 جنيه مصري	ريف	جامعة بكالوريوس /دبلوم	جامعة بكالوريوس /دبلوم	ثانوي	طالب	نعم	لا	لا	نعم	نعم	الإنترنت, الصحف - الكتب - المجلات	نعم	ربما	لا	لا	ربما	نعم	لا	نعم	لا	لا	ربما	ربما	لا	نعم	لا	لا	ربما	ربما	لا	نعم	لا	نعم	نعم	لا	لا	لا
ذكر	18-25 سنة	أعزب\عزباء	6000-12000 جنيه مصري	مدينة	جامعة بكالوريوس /دبلوم	ابتدائي	ابتدائي	طالب	نعم	لا	ليس لدي شريك	لا	نعم	أخرى	نعم	نعم	نعم	نعم	نعم	لا	لا	لا	لا	نعم	نعم	لا	لا	لا	لا	لا	لا	نعم	نعم	نعم	نعم	نعم	نعم	نعم	نعم	نعم
ذكر	18-25 سنة	أعزب\عزباء	أكثر من 12000 جنيه مصري	مدينة	جامعة بكالوريوس /دبلوم	جامعة بكالوريوس /دبلوم	جامعة بكالوريوس /دبلوم	عامل	نعم	لا	لا	لا	نعم	الإنترنت, الصحف - الكتب - المجلات, الطبيب	نعم	نعم	لا	نعم	نعم	لا	لا	لا	لا	لا	نعم	لا	لا	لا	نعم	لا	لا	لا	نعم	نعم	نعم	نعم	نعم	نعم	لا	لا
ذكر	26-35 سنة	متزوج/ة	6000-12000 جنيه مصري	مدينة	جامعة بكالوريوس /دبلوم	ابتدائي	ابتدائي	عامل	نعم	لا	لا	لا	نعم	الإنترنت, التلفاز, المدرسة, الأهل, الأصدقاء, الصحف - الكتب - المجلات, الطبيب, أخرى	ربما	ربما	ربما	ربما	ربما	ربما	ربما	ربما	ربما	ربما	ربما	ربما	ربما	ربما	ربما	ربما	ربما	ربما	ربما	ربما	ربما	ربما	ربما	ربما	ربما	ربما
ذكر	18-25 سنة	أعزب\عزباء	6000-12000 جنيه مصري	مدينة	جامعة بكالوريوس /دبلوم	جامعة بكالوريوس /دبلوم	ثانوي	طالب	نعم	لا	ليس لدي شريك	لا	نعم	أخرى	نعم	لا	نعم	نعم	نعم	نعم	ربما	نعم	نعم	ربما	ربما	ربما	لا	ربما	ربما	لا	ربما	نعم	نعم	ربما	نعم	ربما	ربما	لا	ربما	لا
أنثى	26-35 سنة	متزوج/ة	أقل من 6000 جنيه مصري	ريف	شهادات عليا	جامعة بكالوريوس /دبلوم	ثانوي	عامل	لا	لا	ليس لدي شريك	نعم	نعم	الإنترنت	نعم	ربما	لا	نعم	ربما	نعم	لا	ربما	ربما	ربما	ربما	ربما	ربما	نعم	نعم	نعم	لا	لا	لا	نعم	نعم	لا	لا	نعم	لا	لا
أنثى	26-35 سنة	أعزب\عزباء	أقل من 6000 جنيه مصري	مدينة	ثانوي	ثانوي	ثانوي	عاطل عن العمل	نعم	لا	لا	لا	نعم	التلفاز	نعم	ربما	نعم	نعم	نعم	نعم	نعم	نعم	ربما	ربما	ربما	لا	ربما	لا	لا	لا	نعم	لا	نعم	نعم	نعم	نعم	لا	لا	لا	لا
أنثى	18-25 سنة	أعزب\عزباء	6000-12000 جنيه مصري	مدينة	شهادات عليا	ثانوي	ثانوي	طالب	لا	لا	ليس لدي شريك	نعم	نعم	التلفاز	لا	لا	لا	لا	لا	لا	نعم	ربما	لا	نعم	نعم	نعم	ربما	لا	لا	نعم	لا	نعم	لا	نعم	لا	نعم	لا	لا	لا	لا
أنثى	36-50 سنة	أعزب\عزباء	6000-12000 جنيه مصري	مدينة	ثانوي	ثانوي	جامعة بكالوريوس /دبلوم	طالب	نعم	نعم	نعم	لا	نعم	التلفاز	نعم	لا	نعم	نعم	لا	لا	لا	نعم	نعم	نعم	لا	نعم	نعم	لا	نعم	نعم	نعم	لا	لا	لا	لا	نعم	نعم	نعم	نعم	لا
أنثى	18-25 سنة	أعزب\عزباء	6000-12000 جنيه مصري	ريف	شهادات عليا	جامعة بكالوريوس /دبلوم	شهادات عليا	متقاعد	لا	نعم	نعم	نعم	نعم	الإنترنت, التلفاز	نعم	لا	نعم	نعم	نعم	نعم	نعم	لا	لا	نعم	لا	لا	لا	نعم	نعم	نعم	نعم	لا	لا	نعم	نعم	نعم	نعم	نعم	نعم	لا
أنثى	18-25 سنة	أعزب\عزباء	6000-12000 جنيه مصري	مدينة	جامعة بكالوريوس /دبلوم	ثانوي	ابتدائي	عاطل عن العمل	نعم	نعم	نعم	نعم	نعم	المدرسة	لا	نعم	لا	لا	لا	لا	ربما	لا	نعم	نعم	نعم	لا	نعم	نعم	لا	لا	نعم	نعم	لا	لا	لا	نعم	نعم	لا	لا	نعم
أنثى	18-25 سنة	أعزب\عزباء	أكثر من 12000 جنيه مصري	مدينة	شهادات عليا	شهادات عليا	جامعة بكالوريوس /دبلوم	عامل	لا	لا	لا	نعم	نعم	التلفاز	لا	نعم	نعم	نعم	نعم	نعم	نعم	نعم	لا	لا	لا	نعم	نعم	لا	نعم	نعم	لا	لا	نعم	نعم	لا	لا	نعم	نعم	لا	لا
أنثى	26-35 سنة	متزوج/ة	6000-12000 جنيه مصري	مدينة	شهادات عليا	جامعة بكالوريوس /دبلوم	ثانوي	متقاعد	نعم	لا	ليس لدي شريك	نعم	نعم	التلفاز	لا	ربما	نعم	لا	لا	نعم	لا	لا	نعم	لا	لا	لا	ربما	ربما	لا	نعم	نعم	نعم	نعم	لا	لا	لا	لا	لا	لا	نعم
ذكر	18-25 سنة	متزوج/ة	6000-12000 جنيه مصري	ريف	ثانوي	شهادات عليا	جامعة بكالوريوس /دبلوم	عامل	نعم	نعم	نعم	نعم	نعم	الإنترنت, التلفاز	نعم	لا	لا	ربما	نعم	لا	نعم	نعم	نعم	نعم	نعم	نعم	لا	نعم	لا	نعم	نعم	نعم	لا	لا	نعم	لا	لا	نعم	نعم	نعم
أنثى	26-35 سنة	أعزب\عزباء	6000-12000 جنيه مصري	ريف	شهادات عليا	شهادات عليا	شهادات عليا	مربية منزل	لا	لا	ليس لدي شريك	لا	نعم	الإنترنت	نعم	لا	لا	نعم	نعم	نعم	نعم	لا	نعم	نعم	نعم	نعم	لا	نعم	نعم	نعم	نعم	لا	لا	لا	لا	لا	نعم	نعم	ربما	لا
أنثى	26-35 سنة	أعزب\عزباء	6000-12000 جنيه مصري	ريف	شهادات عليا	شهادات عليا	ثانوي	متقاعد	لا	لا	نعم	نعم	نعم	الإنترنت, التلفاز	نعم	لا	لا	لا	لا	نعم	نعم	نعم	نعم	لا	نعم	نعم	نعم	لا	نعم	نعم	لا	لا	نعم	لا	لا	لا	لا	نعم	لا	نعم
أنثى	26-35 سنة	أعزب\عزباء	6000-12000 جنيه مصري	ريف	شهادات عليا	ثانوي	جامعة بكالوريوس /دبلوم	متقاعد	لا	نعم	لا	نعم	نعم	الإنترنت, التلفاز, المدرسة	لا	نعم	نعم	نعم	نعم	لا	نعم	نعم	لا	نعم	لا	لا	نعم	لا	لا	نعم	لا	نعم	نعم	لا	لا	لا	ربما	لا	نعم	لا
أنثى	18-25 سنة	أعزب\عزباء	6000-12000 جنيه مصري	مدينة	جامعة بكالوريوس /دبلوم	ابتدائي	ثانوي	طالب	نعم	لا	لا	لا	نعم	الصحف - الكتب - المجلات	نعم	لا	لا	ربما	نعم	لا	لا	لا	لا	لا	لا	لا	ربما	لا	لا	لا	لا	نعم	نعم	نعم	نعم	نعم	نعم	نعم	لا	لا
ذكر	18-25 سنة	أعزب\عزباء	6000-12000 جنيه مصري	مدينة	جامعة بكالوريوس /دبلوم	ابتدائي	جامعة بكالوريوس /دبلوم	طالب	نعم	لا	ليس لدي شريك	لا	نعم	الإنترنت, التلفاز, الأصدقاء, الصحف - الكتب - المجلات, الطبيب, أخرى	نعم	ربما	نعم	ربما	نعم	ربما	ربما	ربما	ربما	ربما	ربما	ربما	ربما	ربما	ربما	لا	ربما	ربما	نعم	نعم	نعم	نعم	ربما	ربما	ربما	لا
ذكر	18-25 سنة	أعزب\عزباء	أقل من 6000 جنيه مصري	ريف	جامعة بكالوريوس /دبلوم	ابتدائي	ابتدائي	طالب	نعم	لا	ليس لدي شريك	لا	نعم	الصحف - الكتب - المجلات, الطبيب	نعم	ربما	ربما	نعم	نعم	لا	لا	لا	لا	نعم	ربما	ربما	ربما	لا	لا	لا	لا	ربما	نعم	نعم	نعم	نعم	ربما	ربما	ربما	لا
أنثى	18-25 سنة	أعزب\عزباء	6000-12000 جنيه مصري	ريف	جامعة بكالوريوس /دبلوم	جامعة بكالوريوس /دبلوم	جامعة بكالوريوس /دبلوم	طالب	نعم	نعم	لا	لا	نعم	أخرى	نعم	نعم	نعم	نعم	نعم	لا	لا	لا	لا	لا	لا	لا	نعم	لا	نعم	لا	لا	لا	نعم	نعم	نعم	نعم	لا	لا	لا	لا
أنثى	18-25 سنة	أعزب\عزباء	6000-12000 جنيه مصري	ريف	جامعة بكالوريوس /دبلوم	جامعة بكالوريوس /دبلوم	جامعة بكالوريوس /دبلوم	طالب	نعم	لا	ليس لدي شريك	لا	نعم	الطبيب	نعم	نعم	ربما	نعم	نعم	لا	لا	لا	لا	لا	ربما	ربما	ربما	لا	ربما	ربما	ربما	نعم	نعم	نعم	ربما	نعم	لا	ربما	لا	لا
أنثى	18-25 سنة	أعزب\عزباء	6000-12000 جنيه مصري	ريف	جامعة بكالوريوس /دبلوم	جامعة بكالوريوس /دبلوم	جامعة بكالوريوس /دبلوم	طالب	نعم	لا	لا	لا	نعم	المدرسة	نعم	نعم	نعم	نعم	نعم	لا	لا	لا	لا	لا	نعم	لا	نعم	لا	ربما	لا	لا	نعم	نعم	نعم	نعم	نعم	نعم	نعم	لا	لا
ذكر	18-25 سنة	أعزب\عزباء	6000-12000 جنيه مصري	ريف	جامعة بكالوريوس /دبلوم	جامعة بكالوريوس /دبلوم	جامعة بكالوريوس /دبلوم	طالب	نعم	لا	لا	لا	نعم	الإنترنت, المدرسة, الطبيب	نعم	نعم	ربما	نعم	نعم	لا	لا	لا	لا	لا	نعم	لا	ربما	لا	ربما	لا	لا	ربما	نعم	نعم	نعم	نعم	لا	ربما	ربما	لا
أنثى	26-35 سنة	متزوج/ة	6000-12000 جنيه مصري	مدينة	ثانوي	ثانوي	ثانوي	عاطل عن العمل	نعم	لا	لا	لا	لا	الإنترنت, التلفاز	نعم	ربما	ربما	ربما	لا	لا	لا	لا	لا	لا	لا	لا	لا	لا	لا	ربما	لا	لا	لا	ربما	ربما	ربما	ربما	ربما	ربما	ربما
أنثى	26-35 سنة	متزوج/ة	6000-12000 جنيه مصري	ريف	ثانوي	ثانوي	ابتدائي	عامل	نعم	نعم	لا	لا	نعم	المدرسة	لا	ربما	ربما	لا	لا	لا	ربما	ربما	لا	ربما	ربما	ربما	ربما	لا	نعم	نعم	نعم	نعم	لا	لا	لا	لا	لا	نعم	نعم	نعم
أنثى	26-35 سنة	أعزب\عزباء	6000-12000 جنيه مصري	ريف	جامعة بكالوريوس /دبلوم	ثانوي	ثانوي	عاطل عن العمل	نعم	نعم	نعم	نعم	نعم	الإنترنت, التلفاز	لا	نعم	لا	ربما	ربما	لا	لا	لا	لا	لا	لا	لا	نعم	ربما	ربما	ربما	ربما	ربما	لا	لا	لا	لا	ربما	لا	ربما	لا
ذكر	18-25 سنة	متزوج/ة	6000-12000 جنيه مصري	ريف	ابتدائي	ابتدائي	شهادات عليا	عاطل عن العمل	لا	نعم	نعم	لا	لا	الإنترنت, التلفاز	نعم	نعم	نعم	نعم	نعم	نعم	نعم	نعم	نعم	لا	لا	نعم	نعم	نعم	لا	لا	لا	لا	لا	لا	لا	لا	نعم	لا	ربما	لا
أنثى	18-25 سنة	متزوج/ة	6000-12000 جنيه مصري	مدينة	شهادات عليا	شهادات عليا	جامعة بكالوريوس /دبلوم	عاطل عن العمل	لا	لا	لا	نعم	نعم	الإنترنت, التلفاز	نعم	نعم	لا	نعم	لا	نعم	نعم	لا	لا	لا	نعم	نعم	لا	لا	لا	لا	نعم	لا	لا	لا	لا	نعم	نعم	لا	لا	ربما
ذكر	18-25 سنة	أعزب\عزباء	6000-12000 جنيه مصري	ريف	جامعة بكالوريوس /دبلوم	ثانوي	ثانوي	عاطل عن العمل	لا	لا	لا	نعم	نعم	الإنترنت, التلفاز	لا	ربما	لا	لا	لا	ربما	ربما	لا	ربما	ربما	لا	ربما	لا	لا	لا	لا	لا	لا	لا	نعم	نعم	نعم	لا	نعم	لا	نعم
ذكر	18-25 سنة	أعزب\عزباء	6000-12000 جنيه مصري	ريف	ثانوي	ابتدائي	ابتدائي	عامل	نعم	نعم	نعم	نعم	نعم	التلفاز	نعم	لا	نعم	لا	لا	نعم	نعم	نعم	نعم	لا	لا	لا	نعم	نعم	لا	نعم	لا	لا	نعم	لا	لا	لا	لا	لا	نعم	نعم
أنثى	26-35 سنة	أعزب\عزباء	6000-12000 جنيه مصري	مدينة	شهادات عليا	شهادات عليا	جامعة بكالوريوس /دبلوم	عاطل عن العمل	لا	لا	لا	نعم	نعم	التلفاز, المدرسة	نعم	لا	نعم	نعم	نعم	نعم	نعم	لا	لا	لا	لا	لا	نعم	لا	لا	نعم	نعم	لا	لا	لا	نعم	نعم	لا	لا	نعم	نعم
ذكر	26-35 سنة	أعزب\عزباء	6000-12000 جنيه مصري	ريف	ثانوي	ثانوي	ثانوي	عامل	لا	لا	ليس لدي شريك	نعم	نعم	المدرسة	لا	لا	نعم	نعم	ربما	ربما	ربما	ربما	لا	ربما	ربما	ربما	نعم	لا	ربما	لا	ربما	ربما	لا	ربما	ربما	لا	لا	نعم	نعم	نعم
أنثى	18-25 سنة	أعزب\عزباء	6000-12000 جنيه مصري	مدينة	شهادات عليا	جامعة بكالوريوس /دبلوم	جامعة بكالوريوس /دبلوم	عاطل عن العمل	لا	لا	لا	لا	لا	التلفاز	نعم	لا	لا	لا	ربما	لا	لا	لا	لا	لا	لا	نعم	نعم	نعم	ربما	لا	ربما	ربما	لا	ربما	ربما	لا	لا	لا	لا	لا
أنثى	26-35 سنة	متزوج/ة	6000-12000 جنيه مصري	مدينة	جامعة بكالوريوس /دبلوم	جامعة بكالوريوس /دبلوم	ثانوي	مربية منزل	لا	لا	لا	لا	نعم	التلفاز	لا	نعم	لا	نعم	نعم	لا	نعم	نعم	نعم	نعم	نعم	لا	لا	لا	لا	لا	لا	لا	نعم	نعم	لا	لا	لا	نعم	نعم	نعم
أنثى	26-35 سنة	متزوج/ة	6000-12000 جنيه مصري	ريف	جامعة بكالوريوس /دبلوم	ثانوي	جامعة بكالوريوس /دبلوم	عاطل عن العمل	نعم	نعم	لا	لا	لا	المدرسة	لا	لا	لا	لا	لا	ربما	ربما	ربما	لا	لا	نعم	لا	لا	ربما	ربما	ربما	ربما	نعم	ربما	لا	نعم	نعم	لا	لا	نعم	نعم
ذكر	26-35 سنة	أعزب\عزباء	6000-12000 جنيه مصري	مدينة	جامعة بكالوريوس /دبلوم	ثانوي	ثانوي	عاطل عن العمل	نعم	نعم	لا	نعم	نعم	الإنترنت, التلفاز	نعم	لا	نعم	نعم	لا	نعم	نعم	نعم	نعم	لا	لا	نعم	لا	نعم	نعم	لا	لا	لا	لا	نعم	لا	نعم	لا	نعم	نعم	نعم
أنثى	18-25 سنة	متزوج/ة	6000-12000 جنيه مصري	ريف	جامعة بكالوريوس /دبلوم	جامعة بكالوريوس /دبلوم	جامعة بكالوريوس /دبلوم	متقاعد	لا	نعم	نعم	نعم	لا	الإنترنت, التلفاز	نعم	لا	لا	لا	لا	نعم	نعم	لا	نعم	لا	نعم	نعم	لا	لا	لا	نعم	لا	نعم	لا	نعم	نعم	لا	لا	ربما	نعم	نعم
أنثى	26-35 سنة	متزوج/ة	6000-12000 جنيه مصري	ريف	جامعة بكالوريوس /دبلوم	ثانوي	ثانوي	متقاعد	نعم	نعم	نعم	نعم	نعم	الإنترنت, المدرسة	نعم	لا	نعم	لا	لا	نعم	نعم	نعم	نعم	نعم	نعم	نعم	نعم	لا	نعم	نعم	نعم	لا	لا	لا	لا	لا	لا	لا	نعم	نعم
أنثى	26-35 سنة	متزوج/ة	6000-12000 جنيه مصري	ريف	ثانوي	ثانوي	ثانوي	متقاعد	نعم	لا	لا	نعم	لا	الإنترنت, المدرسة	نعم	لا	لا	لا	لا	نعم	لا	لا	نعم	لا	لا	لا	لا	نعم	نعم	نعم	نعم	لا	نعم	نعم	نعم	لا	لا	نعم	نعم	نعم
أنثى	26-35 سنة	متزوج/ة	6000-12000 جنيه مصري	ريف	ثانوي	شهادات عليا	جامعة بكالوريوس /دبلوم	متقاعد	نعم	نعم	لا	لا	لا	الإنترنت, التلفاز	لا	لا	نعم	لا	نعم	لا	لا	نعم	نعم	نعم	لا	لا	لا	لا	لا	لا	نعم	لا	نعم	نعم	نعم	لا	نعم	لا	لا	لا
أنثى	26-35 سنة	أعزب\عزباء	6000-12000 جنيه مصري	ريف	ثانوي	ثانوي	ابتدائي	عاطل عن العمل	نعم	نعم	لا	نعم	نعم	التلفاز, الأهل	لا	لا	نعم	نعم	لا	نعم	نعم	لا	لا	نعم	نعم	لا	نعم	لا	نعم	نعم	نعم	نعم	نعم	لا	نعم	نعم	نعم	لا	لا	لا
ذكر	26-35 سنة	أعزب\عزباء	6000-12000 جنيه مصري	مدينة	جامعة بكالوريوس /دبلوم	جامعة بكالوريوس /دبلوم	ابتدائي	متقاعد	نعم	نعم	نعم	نعم	نعم	التلفاز, المدرسة	لا	لا	لا	لا	لا	لا	لا	لا	نعم	لا	لا	لا	لا	لا	ربما	ربما	لا	لا	لا	نعم	لا	نعم	لا	لا	نعم	نعم
أنثى	18-25 سنة	متزوج/ة	6000-12000 جنيه مصري	مدينة	ثانوي	ثانوي	ثانوي	عاطل عن العمل	نعم	لا	نعم	نعم	نعم	الإنترنت, التلفاز	لا	لا	نعم	نعم	لا	لا	لا	لا	نعم	لا	لا	لا	لا	لا	لا	لا	لا	لا	نعم	لا	نعم	نعم	نعم	نعم	نعم	لا
أنثى	18-25 سنة	متزوج/ة	6000-12000 جنيه مصري	ريف	ثانوي	ابتدائي	ابتدائي	عامل	نعم	لا	ليس لدي شريك	لا	لا	الإنترنت	لا	لا	لا	نعم	لا	نعم	نعم	لا	لا	لا	لا	لا	لا	لا	لا	نعم	نعم	لا	ربما	لا	لا	لا	لا	لا	لا	نعم
أنثى	26-35 سنة	متزوج/ة	أقل من 6000 جنيه مصري	مدينة	ابتدائي	ابتدائي	ثانوي	عامل	لا	لا	نعم	نعم	نعم	الإنترنت	نعم	لا	لا	لا	لا	نعم	نعم	نعم	نعم	نعم	نعم	نعم	لا	لا	نعم	نعم	نعم	لا	نعم	نعم	لا	لا	لا	لا	لا	لا
ذكر	18-25 سنة	متزوج/ة	أقل من 6000 جنيه مصري	مدينة	شهادات عليا	ابتدائي	شهادات عليا	طالب	لا	نعم	لا	لا	لا	التلفاز	لا	نعم	نعم	نعم	نعم	لا	لا	لا	نعم	لا	نعم	نعم	نعم	ربما	ربما	نعم	نعم	نعم	لا	لا	نعم	نعم	لا	لا	لا	لا
ذكر	18-25 سنة	متزوج/ة	6000-12000 جنيه مصري	مدينة	ثانوي	ثانوي	ثانوي	عاطل عن العمل	نعم	لا	لا	نعم	نعم	الإنترنت	نعم	لا	لا	لا	لا	نعم	لا	نعم	لا	لا	لا	لا	لا	لا	ربما	نعم	نعم	نعم	لا	لا	نعم	نعم	لا	لا	لا	نعم
ذكر	18-25 سنة	أعزب\عزباء	6000-12000 جنيه مصري	مدينة	ثانوي	ثانوي	ثانوي	عاطل عن العمل	نعم	لا	ليس لدي شريك	نعم	نعم	الإنترنت	نعم	لا	نعم	نعم	نعم	نعم	نعم	نعم	نعم	نعم	لا	نعم	نعم	نعم	نعم	نعم	نعم	لا	نعم	نعم	نعم	لا	لا	نعم	لا	نعم
أنثى	36-50 سنة	أعزب\عزباء	6000-12000 جنيه مصري	ريف	ثانوي	ثانوي	ثانوي	متقاعد	لا	لا	لا	لا	لا	التلفاز	لا	نعم	نعم	نعم	نعم	لا	لا	لا	لا	لا	لا	لا	نعم	لا	ربما	نعم	ربما	لا	نعم	نعم	ربما	لا	نعم	لا	لا	لا
أنثى	26-35 سنة	أعزب\عزباء	6000-12000 جنيه مصري	ريف	ابتدائي	ثانوي	جامعة بكالوريوس /دبلوم	عاطل عن العمل	نعم	نعم	نعم	لا	نعم	التلفاز	نعم	لا	لا	لا	نعم	لا	لا	لا	لا	لا	ربما	لا	لا	لا	نعم	نعم	نعم	نعم	لا	نعم	نعم	لا	لا	لا	لا	لا
أنثى	18-25 سنة	متزوج/ة	6000-12000 جنيه مصري	ريف	ثانوي	ثانوي	ابتدائي	عامل	نعم	نعم	نعم	نعم	نعم	التلفاز	نعم	لا	لا	لا	نعم	نعم	لا	لا	لا	نعم	لا	لا	لا	نعم	نعم	نعم	نعم	نعم	نعم	لا	نعم	لا	لا	لا	لا	لا
ذكر	36-50 سنة	أعزب\عزباء	6000-12000 جنيه مصري	مدينة	ثانوي	ثانوي	ثانوي	عاطل عن العمل	نعم	لا	نعم	لا	نعم	الإنترنت	نعم	لا	نعم	نعم	نعم	نعم	نعم	لا	لا	ربما	لا	لا	نعم	نعم	لا	نعم	لا	نعم	نعم	نعم	نعم	لا	لا	لا	لا	لا
أنثى	26-35 سنة	متزوج/ة	6000-12000 جنيه مصري	مدينة	ثانوي	ثانوي	ابتدائي	عامل	لا	لا	لا	نعم	نعم	التلفاز, المدرسة	لا	لا	نعم	نعم	نعم	نعم	نعم	نعم	نعم	نعم	لا	لا	لا	نعم	نعم	نعم	نعم	نعم	نعم	لا	نعم	نعم	لا	لا	نعم	نعم
أنثى	18-25 سنة	متزوج/ة	6000-12000 جنيه مصري	ريف	جامعة بكالوريوس /دبلوم	جامعة بكالوريوس /دبلوم	ثانوي	عاطل عن العمل	نعم	نعم	نعم	نعم	نعم	التلفاز, المدرسة	لا	نعم	لا	نعم	لا	نعم	نعم	نعم	نعم	نعم	نعم	نعم	لا	نعم	نعم	نعم	نعم	لا	لا	نعم	لا	نعم	نعم	نعم	لا	لا
أنثى	18-25 سنة	متزوج/ة	6000-12000 جنيه مصري	مدينة	ابتدائي	ابتدائي	ابتدائي	عامل	لا	لا	لا	نعم	نعم	الإنترنت	نعم	نعم	نعم	نعم	نعم	لا	لا	لا	نعم	نعم	لا	ربما	نعم	لا	لا	لا	لا	لا	لا	لا	نعم	نعم	لا	لا	لا	نعم
أنثى	18-25 سنة	متزوج/ة	6000-12000 جنيه مصري	مدينة	ابتدائي	ثانوي	ثانوي	مربية منزل	لا	لا	لا	لا	نعم	الإنترنت	نعم	لا	لا	لا	نعم	نعم	نعم	لا	لا	لا	لا	نعم	لا	لا	لا	لا	نعم	لا	نعم	لا	لا	لا	لا	لا	لا	لا
أنثى	18-25 سنة	متزوج/ة	6000-12000 جنيه مصري	مدينة	ثانوي	ثانوي	ابتدائي	عاطل عن العمل	نعم	لا	لا	نعم	نعم	الإنترنت	نعم	لا	نعم	نعم	نعم	نعم	نعم	نعم	نعم	نعم	نعم	نعم	نعم	نعم	لا	نعم	نعم	نعم	نعم	لا	لا	لا	ربما	لا	لا	لا
ذكر	18-25 سنة	متزوج/ة	6000-12000 جنيه مصري	ريف	ثانوي	ثانوي	ثانوي	عامل	نعم	نعم	لا	نعم	نعم	الإنترنت, التلفاز	لا	لا	نعم	نعم	لا	لا	لا	لا	لا	لا	لا	لا	لا	لا	لا	نعم	لا	ربما	نعم	نعم	نعم	لا	لا	لا	لا	نعم
ذكر	18-25 سنة	أعزب\عزباء	6000-12000 جنيه مصري	مدينة	ثانوي	شهادات عليا	جامعة بكالوريوس /دبلوم	متقاعد	لا	لا	نعم	لا	نعم	الإنترنت, التلفاز	لا	نعم	لا	نعم	لا	نعم	نعم	نعم	نعم	نعم	لا	لا	لا	نعم	نعم	نعم	نعم	نعم	لا	نعم	نعم	لا	نعم	نعم	نعم	لا
أنثى	26-35 سنة	متزوج/ة	أقل من 6000 جنيه مصري	ريف	ثانوي	ثانوي	جامعة بكالوريوس /دبلوم	عاطل عن العمل	نعم	لا	لا	نعم	نعم	التلفاز	لا	لا	لا	لا	نعم	لا	لا	نعم	نعم	لا	نعم	لا	لا	لا	لا	نعم	لا	لا	نعم	نعم	نعم	لا	لا	لا	نعم	نعم
أنثى	26-35 سنة	متزوج/ة	6000-12000 جنيه مصري	ريف	ثانوي	ابتدائي	ابتدائي	عامل	نعم	لا	لا	نعم	نعم	التلفاز, المدرسة	لا	نعم	نعم	نعم	نعم	نعم	نعم	نعم	نعم	لا	ربما	ربما	لا	لا	لا	لا	لا	لا	لا	لا	نعم	نعم	نعم	لا	لا	نعم
أنثى	26-35 سنة	أعزب\عزباء	أقل من 6000 جنيه مصري	ريف	ثانوي	ابتدائي	ثانوي	عاطل عن العمل	لا	لا	لا	نعم	نعم	الإنترنت	نعم	لا	نعم	نعم	نعم	ربما	لا	لا	لا	لا	لا	نعم	نعم	لا	لا	نعم	نعم	نعم	نعم	نعم	نعم	نعم	لا	نعم	لا	لا
ذكر	26-35 سنة	متزوج/ة	6000-12000 جنيه مصري	مدينة	ابتدائي	ابتدائي	ابتدائي	عامل	نعم	نعم	نعم	نعم	نعم	الإنترنت	لا	لا	نعم	نعم	نعم	نعم	نعم	لا	نعم	نعم	لا	لا	لا	نعم	نعم	نعم	نعم	نعم	نعم	نعم	نعم	لا	لا	نعم	نعم	نعم
أنثى	18-25 سنة	أعزب\عزباء	أكثر من 12000 جنيه مصري	ريف	ثانوي	ثانوي	ابتدائي	عامل	نعم	لا	لا	نعم	نعم	التلفاز	ربما	نعم	نعم	نعم	نعم	لا	لا	لا	لا	نعم	نعم	نعم	نعم	نعم	ربما	نعم	نعم	نعم	نعم	نعم	نعم	نعم	نعم	نعم	نعم	نعم
ذكر	26-35 سنة	أعزب\عزباء	6000-12000 جنيه مصري	مدينة	ابتدائي	ثانوي	ثانوي	عاطل عن العمل	نعم	لا	لا	نعم	لا	المدرسة	نعم	نعم	نعم	نعم	لا	نعم	لا	لا	نعم	لا	لا	نعم	نعم	نعم	لا	نعم	نعم	لا	نعم	لا	لا	لا	لا	نعم	نعم	نعم
ذكر	18-25 سنة	متزوج/ة	أقل من 6000 جنيه مصري	ريف	جامعة بكالوريوس /دبلوم	ابتدائي	ثانوي	عامل	نعم	نعم	نعم	نعم	نعم	التلفاز	لا	نعم	نعم	لا	نعم	لا	نعم	نعم	نعم	نعم	ربما	نعم	نعم	لا	لا	نعم	لا	ربما	لا	ربما	لا	لا	نعم	نعم	لا	نعم
أنثى	18-25 سنة	متزوج/ة	6000-12000 جنيه مصري	مدينة	جامعة بكالوريوس /دبلوم	ثانوي	ابتدائي	عاطل عن العمل	نعم	لا	لا	نعم	نعم	التلفاز	لا	نعم	نعم	نعم	لا	نعم	نعم	نعم	نعم	نعم	لا	لا	نعم	لا	لا	لا	لا	لا	نعم	لا	نعم	نعم	لا	نعم	لا	لا
أنثى	18-25 سنة	أعزب\عزباء	6000-12000 جنيه مصري	ريف	ثانوي	ابتدائي	ابتدائي	عامل	نعم	لا	ليس لدي شريك	لا	نعم	الإنترنت	لا	لا	لا	نعم	لا	نعم	نعم	نعم	نعم	نعم	لا	لا	لا	لا	نعم	نعم	نعم	لا	ربما	ربما	نعم	لا	نعم	ربما	لا	لا
أنثى	26-35 سنة	متزوج/ة	أقل من 6000 جنيه مصري	مدينة	شهادات عليا	شهادات عليا	شهادات عليا	مربية منزل	نعم	نعم	لا	نعم	لا	المدرسة	نعم	نعم	نعم	لا	نعم	نعم	نعم	لا	نعم	نعم	لا	نعم	نعم	نعم	نعم	لا	ربما	نعم	نعم	لا	نعم	لا	نعم	نعم	نعم	لا
ذكر	18-25 سنة	أعزب\عزباء	6000-12000 جنيه مصري	ريف	ثانوي	جامعة بكالوريوس /دبلوم	ثانوي	عاطل عن العمل	نعم	لا	لا	نعم	نعم	الإنترنت	نعم	نعم	لا	نعم	نعم	نعم	نعم	لا	لا	نعم	نعم	نعم	نعم	لا	لا	لا	ربما	لا	لا	لا	لا	ربما	نعم	نعم	نعم	نعم
أنثى	26-35 سنة	أعزب\عزباء	6000-12000 جنيه مصري	مدينة	جامعة بكالوريوس /دبلوم	جامعة بكالوريوس /دبلوم	ثانوي	عاطل عن العمل	نعم	نعم	نعم	لا	لا	الإنترنت	ربما	لا	نعم	لا	لا	لا	لا	نعم	لا	لا	لا	لا	لا	نعم	نعم	نعم	نعم	نعم	نعم	لا	نعم	نعم	لا	نعم	لا	لا
أنثى	18-25 سنة	أعزب\عزباء	6000-12000 جنيه مصري	مدينة	جامعة بكالوريوس /دبلوم	ثانوي	ثانوي	عامل	نعم	نعم	نعم	نعم	نعم	المدرسة	نعم	نعم	لا	نعم	لا	نعم	لا	لا	لا	لا	لا	نعم	لا	لا	لا	لا	لا	لا	نعم	لا	لا	نعم	نعم	لا	لا	لا
ذكر	18-25 سنة	أعزب\عزباء	6000-12000 جنيه مصري	مدينة	جامعة بكالوريوس /دبلوم	جامعة بكالوريوس /دبلوم	جامعة بكالوريوس /دبلوم	طالب	نعم	لا	ليس لدي شريك	لا	نعم	الإنترنت, الأهل, الطبيب, أخرى	نعم	ربما	ربما	ربما	نعم	لا	لا	لا	لا	لا	لا	لا	نعم	لا	لا	لا	لا	لا	نعم	نعم	نعم	نعم	ربما	نعم	لا	لا
أنثى	18-25 سنة	أعزب\عزباء	أكثر من 12000 جنيه مصري	مدينة	جامعة بكالوريوس /دبلوم	شهادات عليا	شهادات عليا	طالب	لا	لا	ليس لدي شريك	لا	نعم	الإنترنت	ربما	ربما	لا	لا	لا	لا	لا	لا	لا	لا	ربما	لا	ربما	لا	لا	لا	لا	لا	نعم	نعم	نعم	نعم	نعم	نعم	لا	لا
أنثى	18-25 سنة	أعزب\عزباء	6000-12000 جنيه مصري	مدينة	جامعة بكالوريوس /دبلوم	جامعة بكالوريوس /دبلوم	جامعة بكالوريوس /دبلوم	طالب	لا	لا	نعم	لا	نعم	الإنترنت	نعم	ربما	لا	لا	نعم	لا	لا	لا	لا	لا	لا	لا	لا	لا	ربما	لا	لا	ربما	نعم	نعم	نعم	نعم	نعم	نعم	لا	لا
ذكر	18-25 سنة	أعزب\عزباء	أكثر من 12000 جنيه مصري	مدينة	جامعة بكالوريوس /دبلوم	جامعة بكالوريوس /دبلوم	جامعة بكالوريوس /دبلوم	طالب	نعم	لا	نعم	لا	نعم	الإنترنت, التلفاز, المدرسة, الأهل, الأصدقاء, الصحف - الكتب - المجلات, الطبيب, أخرى	نعم	نعم	لا	ربما	نعم	لا	لا	لا	لا	لا	لا	لا	ربما	لا	ربما	لا	لا	ربما	نعم	نعم	نعم	نعم	نعم	نعم	لا	لا
ذكر	18-25 سنة	أعزب\عزباء	أقل من 6000 جنيه مصري	مدينة	جامعة بكالوريوس /دبلوم	جامعة بكالوريوس /دبلوم	جامعة بكالوريوس /دبلوم	طالب	نعم	لا	لا	لا	نعم	الإنترنت	لا	لا	لا	لا	لا	لا	لا	لا	لا	لا	نعم	لا	لا	لا	لا	نعم	لا	نعم	ربما	لا	نعم	لا	لا	لا	لا	لا
أنثى	18-25 سنة	أعزب\عزباء	6000-12000 جنيه مصري	مدينة	جامعة بكالوريوس /دبلوم	جامعة بكالوريوس /دبلوم	جامعة بكالوريوس /دبلوم	طالب	نعم	لا	ليس لدي شريك	لا	نعم	الأهل, الأصدقاء	نعم	نعم	ربما	نعم	نعم	لا	لا	لا	لا	لا	ربما	ربما	ربما	ربما	ربما	لا	لا	نعم	نعم	نعم	نعم	نعم	نعم	نعم	لا	لا
ذكر	18-25 سنة	أعزب\عزباء	6000-12000 جنيه مصري	مدينة	جامعة بكالوريوس /دبلوم	جامعة بكالوريوس /دبلوم	جامعة بكالوريوس /دبلوم	طالب	نعم	لا	لا	لا	نعم	الإنترنت, التلفاز, الأصدقاء, الصحف - الكتب - المجلات	نعم	نعم	ربما	نعم	نعم	لا	لا	لا	لا	لا	لا	لا	ربما	لا	ربما	لا	لا	لا	نعم	نعم	نعم	نعم	نعم	نعم	لا	لا
ذكر	18-25 سنة	أعزب\عزباء	6000-12000 جنيه مصري	مدينة	جامعة بكالوريوس /دبلوم	جامعة بكالوريوس /دبلوم	جامعة بكالوريوس /دبلوم	عامل	نعم	لا	لا	لا	نعم	الإنترنت, التلفاز, المدرسة, الأهل, الأصدقاء, الطبيب	نعم	نعم	نعم	نعم	نعم	لا	لا	لا	لا	نعم	نعم	ربما	لا	لا	لا	لا	لا	نعم	نعم	نعم	نعم	نعم	نعم	نعم	نعم	نعم
ذكر	18-25 سنة	أعزب\عزباء	6000-12000 جنيه مصري	مدينة	جامعة بكالوريوس /دبلوم	جامعة بكالوريوس /دبلوم	جامعة بكالوريوس /دبلوم	طالب	نعم	لا	لا	لا	نعم	الإنترنت, الأهل, الأصدقاء	نعم	ربما	لا	نعم	نعم	لا	لا	لا	لا	لا	ربما	لا	ربما	لا	ربما	لا	لا	نعم	نعم	نعم	نعم	نعم	نعم	نعم	لا	لا
ذكر	18-25 سنة	أعزب\عزباء	6000-12000 جنيه مصري	مدينة	جامعة بكالوريوس /دبلوم	جامعة بكالوريوس /دبلوم	جامعة بكالوريوس /دبلوم	طالب	نعم	لا	ليس لدي شريك	لا	نعم	الإنترنت, التلفاز, المدرسة, الأهل, الأصدقاء, الصحف - الكتب - المجلات	نعم	نعم	نعم	لا	نعم	لا	لا	لا	لا	ربما	لا	لا	لا	لا	لا	لا	لا	لا	نعم	نعم	نعم	نعم	نعم	نعم	لا	لا
أنثى	36-50 سنة	متزوج/ة	6000-12000 جنيه مصري	مدينة	جامعة بكالوريوس /دبلوم	جامعة بكالوريوس /دبلوم	جامعة بكالوريوس /دبلوم	مربية منزل	لا	لا	لا	لا	نعم	الإنترنت, التلفاز, المدرسة, الأهل, الأصدقاء, الصحف - الكتب - المجلات	نعم	نعم	ربما	لا	ربما	لا	لا	لا	لا	لا	نعم	لا	ربما	لا	لا	لا	لا	ربما	ربما	نعم	نعم	نعم	ربما	ربما	لا	لا
ذكر	18-25 سنة	أعزب\عزباء	أكثر من 12000 جنيه مصري	مدينة	جامعة بكالوريوس /دبلوم	ثانوي	جامعة بكالوريوس /دبلوم	طالب	نعم	لا	ليس لدي شريك	لا	نعم	أخرى	نعم	ربما	نعم	ربما	ربما	ربما	ربما	ربما	ربما	ربما	ربما	لا	ربما	ربما	ربما	لا	لا	ربما	ربما	نعم	ربما	نعم	ربما	ربما	ربما	ربما
ذكر	18-25 سنة	أعزب\عزباء	6000-12000 جنيه مصري	ريف	جامعة بكالوريوس /دبلوم	جامعة بكالوريوس /دبلوم	جامعة بكالوريوس /دبلوم	عامل	لا	لا	لا	لا	نعم	الإنترنت	نعم	نعم	نعم	نعم	لا	لا	لا	لا	نعم	نعم	لا	لا	نعم	لا	نعم	لا	لا	ربما	نعم	نعم	نعم	نعم	ربما	نعم	لا	لا
ذكر	18-25 سنة	أعزب\عزباء	أكثر من 12000 جنيه مصري	ريف	شهادات عليا	جامعة بكالوريوس /دبلوم	جامعة بكالوريوس /دبلوم	طالب	نعم	لا	لا	لا	نعم	الإنترنت, التلفاز, الأصدقاء, الطبيب	نعم	نعم	نعم	نعم	نعم	ربما	لا	ربما	ربما	نعم	لا	لا	ربما	لا	ربما	لا	لا	نعم	نعم	نعم	نعم	نعم	ربما	ربما	لا	لا
ذكر	18-25 سنة	أعزب\عزباء	6000-12000 جنيه مصري	ريف	جامعة بكالوريوس /دبلوم	جامعة بكالوريوس /دبلوم	جامعة بكالوريوس /دبلوم	طالب	نعم	لا	ليس لدي شريك	لا	نعم	الإنترنت, الأهل	نعم	ربما	نعم	ربما	نعم	لا	لا	لا	لا	لا	ربما	لا	ربما	ربما	ربما	لا	لا	ربما	لا	نعم	نعم	نعم	لا	لا	ربما	لا
أنثى	18-25 سنة	أعزب\عزباء	أكثر من 12000 جنيه مصري	مدينة	جامعة بكالوريوس /دبلوم	جامعة بكالوريوس /دبلوم	جامعة بكالوريوس /دبلوم	طالب	نعم	نعم	لا	لا	نعم	الأهل, الطبيب	نعم	لا	لا	نعم	نعم	لا	لا	لا	لا	لا	لا	لا	لا	لا	لا	لا	لا	ربما	نعم	نعم	نعم	نعم	نعم	نعم	لا	لا
ذكر	18-25 سنة	أعزب\عزباء	أكثر من 12000 جنيه مصري	مدينة	جامعة بكالوريوس /دبلوم	جامعة بكالوريوس /دبلوم	جامعة بكالوريوس /دبلوم	طالب	نعم	لا	ليس لدي شريك	لا	نعم	المدرسة	نعم	ربما	ربما	ربما	نعم	لا	لا	لا	لا	ربما	ربما	ربما	ربما	لا	ربما	ربما	لا	لا	نعم	نعم	نعم	نعم	ربما	ربما	لا	لا
ذكر	18-25 سنة	أعزب\عزباء	أقل من 6000 جنيه مصري	مدينة	جامعة بكالوريوس /دبلوم	جامعة بكالوريوس /دبلوم	شهادات عليا	عامل	نعم	لا	ليس لدي شريك	لا	نعم	الإنترنت, الأهل, الأصدقاء	نعم	نعم	لا	ربما	نعم	لا	لا	لا	لا	لا	نعم	لا	لا	لا	لا	لا	لا	ربما	نعم	نعم	نعم	نعم	نعم	نعم	لا	لا
أنثى	18-25 سنة	أعزب\عزباء	6000-12000 جنيه مصري	ريف	جامعة بكالوريوس /دبلوم	ثانوي	ابتدائي	طالب	نعم	لا	ليس لدي شريك	لا	نعم	الإنترنت, المدرسة, أخرى	نعم	نعم	نعم	نعم	نعم	لا	لا	لا	لا	لا	نعم	لا	نعم	لا	نعم	لا	لا	لا	نعم	نعم	ربما	نعم	ربما	ربما	لا	لا
ذكر	18-25 سنة	أعزب\عزباء	6000-12000 جنيه مصري	ريف	جامعة بكالوريوس /دبلوم	جامعة بكالوريوس /دبلوم	جامعة بكالوريوس /دبلوم	طالب	نعم	لا	ليس لدي شريك	لا	نعم	الإنترنت, التلفاز, المدرسة, الأصدقاء	نعم	لا	لا	لا	نعم	لا	لا	لا	لا	لا	لا	لا	نعم	لا	لا	لا	لا	لا	نعم	نعم	نعم	نعم	لا	لا	لا	لا
ذكر	18-25 سنة	أعزب\عزباء	6000-12000 جنيه مصري	ريف	جامعة بكالوريوس /دبلوم	جامعة بكالوريوس /دبلوم	جامعة بكالوريوس /دبلوم	طالب	نعم	لا	لا	لا	نعم	المدرسة	نعم	لا	ربما	لا	نعم	ربما	لا	ربما	لا	لا	ربما	لا	لا	لا	لا	لا	لا	نعم	نعم	ربما	ربما	لا	لا	نعم	ربما	ربما
أنثى	18-25 سنة	أعزب\عزباء	أكثر من 12000 جنيه مصري	مدينة	جامعة بكالوريوس /دبلوم	جامعة بكالوريوس /دبلوم	جامعة بكالوريوس /دبلوم	عامل	لا	لا	لا	لا	نعم	الإنترنت, التلفاز, الصحف - الكتب - المجلات	نعم	لا	ربما	ربما	نعم	لا	لا	لا	لا	لا	لا	لا	لا	لا	لا	لا	لا	ربما	نعم	نعم	نعم	نعم	نعم	نعم	لا	لا
أنثى	18-25 سنة	أعزب\عزباء	أكثر من 12000 جنيه مصري	مدينة	شهادات عليا	شهادات عليا	شهادات عليا	عامل	نعم	لا	لا	لا	نعم	الإنترنت, التلفاز, المدرسة, الأهل, الأصدقاء, الصحف - الكتب - المجلات, الطبيب	نعم	لا	لا	لا	نعم	لا	لا	لا	لا	لا	لا	لا	لا	لا	لا	لا	لا	نعم	نعم	نعم	نعم	نعم	نعم	نعم	لا	لا
أنثى	18-25 سنة	أعزب\عزباء	6000-12000 جنيه مصري	مدينة	جامعة بكالوريوس /دبلوم	شهادات عليا	جامعة بكالوريوس /دبلوم	عاطل عن العمل	نعم	لا	ليس لدي شريك	لا	نعم	الإنترنت, التلفاز, المدرسة, الأهل, الأصدقاء	نعم	ربما	ربما	لا	نعم	لا	لا	لا	لا	لا	ربما	لا	ربما	لا	لا	لا	لا	ربما	نعم	نعم	نعم	نعم	ربما	ربما	ربما	لا
أنثى	18-25 سنة	أعزب\عزباء	6000-12000 جنيه مصري	مدينة	جامعة بكالوريوس /دبلوم	جامعة بكالوريوس /دبلوم	جامعة بكالوريوس /دبلوم	عاطل عن العمل	لا	لا	ليس لدي شريك	لا	نعم	الإنترنت, التلفاز, الطبيب	ربما	ربما	ربما	ربما	نعم	لا	لا	لا	لا	لا	ربما	ربما	ربما	ربما	ربما	لا	لا	ربما	نعم	نعم	نعم	نعم	نعم	نعم	لا	لا
أنثى	18-25 سنة	أعزب\عزباء	6000-12000 جنيه مصري	مدينة	جامعة بكالوريوس /دبلوم	جامعة بكالوريوس /دبلوم	جامعة بكالوريوس /دبلوم	عامل	لا	لا	ليس لدي شريك	لا	نعم	الإنترنت	نعم	نعم	نعم	لا	نعم	لا	لا	لا	لا	لا	لا	لا	نعم	لا	نعم	لا	لا	لا	نعم	نعم	نعم	نعم	نعم	نعم	لا	لا
أنثى	26-35 سنة	أعزب\عزباء	6000-12000 جنيه مصري	مدينة	جامعة بكالوريوس /دبلوم	جامعة بكالوريوس /دبلوم	جامعة بكالوريوس /دبلوم	عاطل عن العمل	لا	لا	ليس لدي شريك	لا	نعم	التلفاز, الأصدقاء	نعم	نعم	لا	نعم	نعم	لا	لا	لا	لا	لا	لا	لا	لا	لا	لا	لا	لا	ربما	نعم	نعم	نعم	نعم	ربما	ربما	لا	لا
ذكر	18-25 سنة	أعزب\عزباء	أكثر من 12000 جنيه مصري	مدينة	جامعة بكالوريوس /دبلوم	جامعة بكالوريوس /دبلوم	جامعة بكالوريوس /دبلوم	طالب	نعم	لا	ليس لدي شريك	لا	نعم	الإنترنت, التلفاز, الأهل, الأصدقاء, الطبيب	نعم	لا	لا	لا	نعم	لا	لا	لا	لا	لا	لا	لا	نعم	لا	ربما	لا	لا	ربما	نعم	نعم	نعم	نعم	ربما	ربما	لا	لا
أنثى	26-35 سنة	أعزب\عزباء	6000-12000 جنيه مصري	مدينة	شهادات عليا	جامعة بكالوريوس /دبلوم	جامعة بكالوريوس /دبلوم	عامل	نعم	لا	ليس لدي شريك	لا	نعم	الإنترنت, المدرسة, الأصدقاء	نعم	ربما	لا	ربما	نعم	لا	لا	لا	لا	لا	لا	لا	ربما	ربما	ربما	ربما	لا	ربما	نعم	نعم	نعم	نعم	ربما	لا	لا	لا
أنثى	18-25 سنة	أعزب\عزباء	أقل من 6000 جنيه مصري	مدينة	جامعة بكالوريوس /دبلوم	جامعة بكالوريوس /دبلوم	جامعة بكالوريوس /دبلوم	عامل	لا	لا	ليس لدي شريك	لا	نعم	الإنترنت, الأهل	نعم	ربما	ربما	ربما	نعم	لا	لا	لا	لا	لا	لا	لا	ربما	لا	ربما	لا	لا	نعم	نعم	نعم	نعم	نعم	ربما	ربما	لا	لا
أنثى	18-25 سنة	أعزب\عزباء	6000-12000 جنيه مصري	مدينة	جامعة بكالوريوس /دبلوم	ثانوي	ثانوي	عاطل عن العمل	لا	لا	ليس لدي شريك	لا	نعم	الإنترنت, التلفاز, المدرسة, الصحف - الكتب - المجلات	نعم	نعم	لا	ربما	نعم	لا	لا	لا	لا	لا	نعم	لا	ربما	لا	لا	ربما	لا	ربما	نعم	نعم	نعم	نعم	نعم	نعم	لا	لا
أنثى	18-25 سنة	أعزب\عزباء	أقل من 6000 جنيه مصري	مدينة	جامعة بكالوريوس /دبلوم	جامعة بكالوريوس /دبلوم	جامعة بكالوريوس /دبلوم	طالب	نعم	لا	لا	لا	نعم	الإنترنت, التلفاز, المدرسة, الأهل, الأصدقاء, الصحف - الكتب - المجلات, الطبيب, أخرى	نعم	نعم	لا	ربما	نعم	لا	لا	لا	لا	لا	لا	لا	نعم	لا	لا	لا	لا	لا	نعم	نعم	نعم	نعم	نعم	نعم	لا	لا
أنثى	18-25 سنة	أعزب\عزباء	أكثر من 12000 جنيه مصري	مدينة	جامعة بكالوريوس /دبلوم	جامعة بكالوريوس /دبلوم	جامعة بكالوريوس /دبلوم	عامل	نعم	لا	ليس لدي شريك	لا	نعم	الإنترنت	ربما	نعم	لا	نعم	نعم	نعم	لا	نعم	ربما	لا	ربما	لا	لا	ربما	ربما	لا	لا	نعم	نعم	نعم	نعم	نعم	ربما	ربما	لا	لا
أنثى	18-25 سنة	أعزب\عزباء	أقل من 6000 جنيه مصري	ريف	جامعة بكالوريوس /دبلوم	ثانوي	ثانوي	عاطل عن العمل	لا	لا	ليس لدي شريك	لا	نعم	الإنترنت, التلفاز, المدرسة, الأهل, الأصدقاء, الصحف - الكتب - المجلات	نعم	نعم	نعم	نعم	نعم	لا	لا	لا	لا	ربما	ربما	ربما	ربما	ربما	ربما	لا	لا	ربما	نعم	نعم	نعم	نعم	ربما	ربما	لا	لا
أنثى	26-35 سنة	متزوج/ة	أقل من 6000 جنيه مصري	ريف	جامعة بكالوريوس /دبلوم	جامعة بكالوريوس /دبلوم	ثانوي	عاطل عن العمل	لا	لا	لا	لا	نعم	الإنترنت	نعم	ربما	نعم	ربما	نعم	ربما	لا	لا	لا	ربما	لا	لا	لا	ربما	ربما	ربما	لا	ربما	ربما	لا	ربما	ربما	لا	لا	ربما	لا
أنثى	18-25 سنة	أعزب\عزباء	أقل من 6000 جنيه مصري	مدينة	شهادات عليا	جامعة بكالوريوس /دبلوم	ثانوي	طالب	نعم	لا	ليس لدي شريك	لا	نعم	الإنترنت	نعم	نعم	نعم	ربما	نعم	ربما	لا	ربما	لا	لا	لا	لا	لا	لا	نعم	لا	لا	ربما	ربما	ربما	ربما	لا	لا	لا	لا	لا
أنثى	18-25 سنة	أعزب\عزباء	6000-12000 جنيه مصري	ريف	شهادات عليا	ثانوي	ابتدائي	طالب	لا	لا	ليس لدي شريك	لا	نعم	التلفاز	ربما	ربما	نعم	ربما	نعم	ربما	ربما	لا	نعم	لا	ربما	لا	ربما	ربما	ربما	لا	لا	لا	ربما	نعم	نعم	نعم	ربما	لا	لا	لا
أنثى	18-25 سنة	أعزب\عزباء	أقل من 6000 جنيه مصري	ريف	جامعة بكالوريوس /دبلوم	ثانوي	ثانوي	عامل	نعم	لا	لا	لا	نعم	الأصدقاء	نعم	نعم	لا	ربما	نعم	لا	لا	لا	لا	لا	ربما	ربما	لا	ربما	ربما	لا	لا	ربما	نعم	نعم	نعم	نعم	نعم	نعم	لا	لا
أنثى	18-25 سنة	أعزب\عزباء	6000-12000 جنيه مصري	ريف	جامعة بكالوريوس /دبلوم	جامعة بكالوريوس /دبلوم	جامعة بكالوريوس /دبلوم	طالب	نعم	لا	لا	لا	نعم	الإنترنت, التلفاز, الطبيب	نعم	نعم	لا	نعم	نعم	لا	لا	لا	لا	لا	نعم	لا	لا	لا	ربما	لا	لا	ربما	نعم	نعم	نعم	نعم	نعم	نعم	لا	لا
أنثى	18-25 سنة	أعزب\عزباء	6000-12000 جنيه مصري	ريف	جامعة بكالوريوس /دبلوم	جامعة بكالوريوس /دبلوم	ابتدائي	عامل	نعم	لا	ليس لدي شريك	لا	نعم	الإنترنت	نعم	ربما	ربما	ربما	نعم	لا	لا	لا	لا	لا	ربما	ربما	لا	ربما	ربما	لا	لا	لا	نعم	نعم	نعم	نعم	ربما	ربما	لا	لا
أنثى	18-25 سنة	أعزب\عزباء	6000-12000 جنيه مصري	ريف	جامعة بكالوريوس /دبلوم	جامعة بكالوريوس /دبلوم	جامعة بكالوريوس /دبلوم	عامل	لا	لا	لا	لا	نعم	الإنترنت	نعم	نعم	لا	ربما	نعم	لا	لا	لا	لا	ربما	ربما	ربما	نعم	ربما	ربما	لا	لا	ربما	نعم	نعم	ربما	نعم	ربما	لا	ربما	لا
أنثى	36-50 سنة	متزوج/ة	أكثر من 12000 جنيه مصري	مدينة	شهادات عليا	جامعة بكالوريوس /دبلوم	ابتدائي	عامل	لا	لا	لا	لا	نعم	الأهل	نعم	ربما	لا	ربما	نعم	لا	لا	لا	لا	لا	لا	لا	لا	لا	لا	لا	لا	لا	نعم	نعم	نعم	نعم	نعم	نعم	لا	لا
أنثى	18-25 سنة	أعزب\عزباء	أقل من 6000 جنيه مصري	مدينة	جامعة بكالوريوس /دبلوم	جامعة بكالوريوس /دبلوم	جامعة بكالوريوس /دبلوم	طالب	نعم	لا	ليس لدي شريك	لا	نعم	الإنترنت, الأصدقاء, الصحف - الكتب - المجلات	نعم	نعم	ربما	نعم	نعم	لا	لا	لا	لا	ربما	ربما	لا	نعم	ربما	ربما	ربما	لا	نعم	ربما	ربما	ربما	ربما	لا	لا	لا	لا
أنثى	18-25 سنة	أعزب\عزباء	أقل من 6000 جنيه مصري	ريف	جامعة بكالوريوس /دبلوم	جامعة بكالوريوس /دبلوم	ابتدائي	طالب	لا	لا	لا	لا	نعم	الإنترنت	نعم	ربما	نعم	نعم	نعم	لا	لا	لا	لا	ربما	ربما	ربما	ربما	لا	نعم	نعم	لا	نعم	نعم	نعم	نعم	نعم	لا	لا	لا	لا
أنثى	18-25 سنة	أعزب\عزباء	6000-12000 جنيه مصري	ريف	جامعة بكالوريوس /دبلوم	جامعة بكالوريوس /دبلوم	جامعة بكالوريوس /دبلوم	عامل	نعم	لا	ليس لدي شريك	لا	نعم	المدرسة	نعم	نعم	لا	نعم	نعم	لا	لا	لا	لا	لا	لا	لا	ربما	لا	لا	لا	لا	نعم	نعم	نعم	نعم	نعم	نعم	نعم	لا	لا
أنثى	18-25 سنة	أعزب\عزباء	أقل من 6000 جنيه مصري	مدينة	جامعة بكالوريوس /دبلوم	جامعة بكالوريوس /دبلوم	جامعة بكالوريوس /دبلوم	طالب	نعم	لا	لا	لا	نعم	الإنترنت, المدرسة, الأصدقاء, الصحف - الكتب - المجلات, الطبيب	نعم	نعم	ربما	لا	نعم	لا	لا	لا	لا	لا	لا	لا	ربما	لا	ربما	لا	ربما	نعم	نعم	نعم	نعم	نعم	ربما	ربما	لا	لا
أنثى	18-25 سنة	أعزب\عزباء	أكثر من 12000 جنيه مصري	ريف	جامعة بكالوريوس /دبلوم	جامعة بكالوريوس /دبلوم	جامعة بكالوريوس /دبلوم	عامل	نعم	نعم	لا	لا	نعم	الإنترنت, الأهل	نعم	نعم	ربما	نعم	نعم	لا	لا	لا	لا	لا	لا	لا	ربما	لا	لا	لا	لا	ربما	نعم	نعم	نعم	نعم	ربما	ربما	لا	لا
أنثى	18-25 سنة	أعزب\عزباء	6000-12000 جنيه مصري	مدينة	جامعة بكالوريوس /دبلوم	جامعة بكالوريوس /دبلوم	جامعة بكالوريوس /دبلوم	عامل	نعم	لا	ليس لدي شريك	لا	نعم	الطبيب, أخرى	نعم	نعم	ربما	ربما	نعم	لا	لا	لا	لا	لا	ربما	لا	نعم	لا	نعم	لا	لا	نعم	نعم	نعم	نعم	نعم	ربما	ربما	لا	لا
أنثى	18-25 سنة	أعزب\عزباء	أقل من 6000 جنيه مصري	مدينة	جامعة بكالوريوس /دبلوم	جامعة بكالوريوس /دبلوم	جامعة بكالوريوس /دبلوم	طالب	نعم	لا	ليس لدي شريك	لا	نعم	الإنترنت, التلفاز, المدرسة, الأهل, الصحف - الكتب - المجلات, الطبيب	نعم	نعم	ربما	نعم	ربما	لا	لا	لا	لا	لا	ربما	لا	ربما	لا	لا	لا	لا	ربما	نعم	نعم	نعم	ربما	ربما	ربما	لا	لا
أنثى	18-25 سنة	أعزب\عزباء	أقل من 6000 جنيه مصري	ريف	جامعة بكالوريوس /دبلوم	ابتدائي	ابتدائي	عامل	نعم	لا	لا	لا	نعم	أخرى	نعم	نعم	نعم	نعم	نعم	لا	لا	لا	لا	لا	لا	لا	لا	لا	ربما	لا	لا	نعم	نعم	نعم	نعم	نعم	ربما	ربما	لا	لا
أنثى	18-25 سنة	أعزب\عزباء	6000-12000 جنيه مصري	مدينة	شهادات عليا	جامعة بكالوريوس /دبلوم	ثانوي	عامل	نعم	لا	ليس لدي شريك	لا	لا	الصحف - الكتب - المجلات	نعم	نعم	ربما	ربما	نعم	لا	لا	لا	لا	لا	ربما	ربما	ربما	لا	ربما	لا	لا	لا	نعم	نعم	نعم	نعم	لا	لا	ربما	لا
أنثى	26-35 سنة	متزوج/ة	أقل من 6000 جنيه مصري	ريف	جامعة بكالوريوس /دبلوم	جامعة بكالوريوس /دبلوم	ابتدائي	مربية منزل	لا	لا	لا	لا	نعم	الأهل	نعم	ربما	نعم	ربما	نعم	لا	لا	لا	لا	ربما	ربما	لا	ربما	ربما	لا	ربما	لا	ربما	نعم	نعم	نعم	نعم	ربما	ربما	ربما	ربما
أنثى	18-25 سنة	أعزب\عزباء	6000-12000 جنيه مصري	مدينة	جامعة بكالوريوس /دبلوم	جامعة بكالوريوس /دبلوم	جامعة بكالوريوس /دبلوم	طالب	نعم	لا	ليس لدي شريك	لا	نعم	الإنترنت, المدرسة, الطبيب	نعم	نعم	ربما	نعم	نعم	لا	لا	لا	لا	لا	ربما	لا	نعم	لا	لا	لا	لا	نعم	نعم	نعم	نعم	نعم	لا	ربما	لا	لا
أنثى	18-25 سنة	أعزب\عزباء	6000-12000 جنيه مصري	مدينة	جامعة بكالوريوس /دبلوم	جامعة بكالوريوس /دبلوم	جامعة بكالوريوس /دبلوم	طالب	نعم	لا	ليس لدي شريك	لا	نعم	الإنترنت, التلفاز, المدرسة, الطبيب	نعم	نعم	نعم	ربما	نعم	لا	لا	لا	لا	لا	ربما	لا	ربما	لا	نعم	لا	لا	ربما	ربما	نعم	ربما	نعم	لا	لا	لا	لا
أنثى	18-25 سنة	أعزب\عزباء	أكثر من 12000 جنيه مصري	مدينة	جامعة بكالوريوس /دبلوم	جامعة بكالوريوس /دبلوم	جامعة بكالوريوس /دبلوم	عامل	نعم	لا	ليس لدي شريك	لا	نعم	الإنترنت, الأهل, الطبيب, أخرى	نعم	نعم	ربما	نعم	نعم	لا	لا	لا	لا	لا	لا	لا	ربما	لا	ربما	لا	لا	لا	نعم	نعم	نعم	نعم	لا	ربما	لا	لا
أنثى	18-25 سنة	أعزب\عزباء	6000-12000 جنيه مصري	مدينة	جامعة بكالوريوس /دبلوم	جامعة بكالوريوس /دبلوم	جامعة بكالوريوس /دبلوم	طالب	نعم	لا	ليس لدي شريك	لا	نعم	الإنترنت, التلفاز, الطبيب	نعم	نعم	ربما	نعم	نعم	لا	لا	لا	لا	لا	لا	لا	لا	لا	لا	لا	لا	نعم	نعم	نعم	نعم	نعم	نعم	نعم	لا	لا
ذكر	18-25 سنة	أعزب\عزباء	أقل من 6000 جنيه مصري	ريف	جامعة بكالوريوس /دبلوم	جامعة بكالوريوس /دبلوم	ثانوي	عامل	نعم	لا	ليس لدي شريك	لا	لا	الإنترنت, التلفاز, الطبيب	نعم	نعم	لا	لا	نعم	لا	لا	لا	لا	لا	لا	لا	لا	لا	لا	لا	لا	نعم	نعم	نعم	لا	نعم	نعم	لا	لا	لا
أنثى	18-25 سنة	أعزب\عزباء	6000-12000 جنيه مصري	مدينة	جامعة بكالوريوس /دبلوم	جامعة بكالوريوس /دبلوم	جامعة بكالوريوس /دبلوم	طالب	نعم	لا	ليس لدي شريك	لا	نعم	الإنترنت, الأهل	نعم	نعم	نعم	ربما	نعم	لا	لا	لا	لا	لا	ربما	لا	ربما	لا	لا	لا	لا	نعم	نعم	نعم	نعم	نعم	ربما	ربما	لا	لا
أنثى	18-25 سنة	متزوج/ة	6000-12000 جنيه مصري	مدينة	جامعة بكالوريوس /دبلوم	ثانوي	ابتدائي	طالب	نعم	لا	نعم	لا	نعم	الأصدقاء	نعم	نعم	نعم	ربما	نعم	لا	لا	لا	لا	لا	ربما	ربما	ربما	ربما	ربما	لا	ربما	لا	ربما	نعم	نعم	نعم	ربما	ربما	لا	لا
أنثى	26-35 سنة	أعزب\عزباء	6000-12000 جنيه مصري	ريف	جامعة بكالوريوس /دبلوم	جامعة بكالوريوس /دبلوم	ثانوي	عامل	نعم	نعم	ليس لدي شريك	لا	نعم	الأهل, الطبيب	نعم	ربما	ربما	ربما	نعم	لا	لا	لا	لا	لا	ربما	لا	ربما	لا	ربما	لا	لا	لا	نعم	نعم	نعم	نعم	لا	لا	ربما	لا
ذكر	26-35 سنة	أعزب\عزباء	أكثر من 12000 جنيه مصري	مدينة	شهادات عليا	جامعة بكالوريوس /دبلوم	جامعة بكالوريوس /دبلوم	عامل	نعم	لا	لا	لا	نعم	الصحف - الكتب - المجلات, الطبيب	نعم	نعم	لا	نعم	نعم	لا	لا	لا	لا	لا	ربما	لا	لا	لا	ربما	لا	لا	نعم	نعم	نعم	نعم	نعم	ربما	نعم	لا	لا
أنثى	36-50 سنة	متزوج/ة	أقل من 6000 جنيه مصري	مدينة	جامعة بكالوريوس /دبلوم	جامعة بكالوريوس /دبلوم	ثانوي	مربية منزل	لا	لا	لا	لا	نعم	الأصدقاء	ربما	نعم	ربما	نعم	نعم	لا	لا	لا	لا	لا	لا	لا	لا	لا	لا	لا	لا	ربما	نعم	نعم	نعم	نعم	نعم	نعم	لا	لا
أنثى	18-25 سنة	أعزب\عزباء	أقل من 6000 جنيه مصري	ريف	جامعة بكالوريوس /دبلوم	جامعة بكالوريوس /دبلوم	جامعة بكالوريوس /دبلوم	طالب	نعم	لا	ليس لدي شريك	لا	نعم	الطبيب	نعم	نعم	لا	لا	نعم	لا	لا	لا	لا	لا	نعم	لا	نعم	لا	لا	لا	لا	ربما	نعم	نعم	نعم	نعم	لا	لا	لا	لا
أنثى	18-25 سنة	متزوج/ة	6000-12000 جنيه مصري	ريف	جامعة بكالوريوس /دبلوم	جامعة بكالوريوس /دبلوم	جامعة بكالوريوس /دبلوم	مربية منزل	لا	لا	ليس لدي شريك	لا	نعم	الإنترنت	نعم	نعم	لا	ربما	نعم	لا	ربما	لا	لا	لا	لا	لا	ربما	ربما	ربما	لا	لا	ربما	ربما	نعم	ربما	ربما	لا	لا	ربما	لا
ذكر	18-25 سنة	أعزب\عزباء	6000-12000 جنيه مصري	مدينة	جامعة بكالوريوس /دبلوم	ثانوي	ثانوي	عامل	نعم	لا	ليس لدي شريك	لا	نعم	الإنترنت, التلفاز, المدرسة, الأهل, الأصدقاء, الصحف - الكتب - المجلات, الطبيب, أخرى	نعم	ربما	نعم	ربما	نعم	لا	ربما	ربما	ربما	لا	ربما	ربما	ربما	ربما	ربما	لا	لا	ربما	نعم	نعم	نعم	ربما	ربما	نعم	لا	لا
ذكر	18-25 سنة	أعزب\عزباء	أقل من 6000 جنيه مصري	مدينة	جامعة بكالوريوس /دبلوم	ثانوي	ثانوي	عامل	نعم	لا	ليس لدي شريك	لا	نعم	المدرسة, الأهل, الأصدقاء, الصحف - الكتب - المجلات	نعم	لا	لا	لا	لا	لا	لا	لا	لا	لا	لا	لا	لا	لا	لا	لا	لا	لا	نعم	نعم	نعم	نعم	نعم	نعم	لا	لا
أنثى	18-25 سنة	أعزب\عزباء	أقل من 6000 جنيه مصري	مدينة	جامعة بكالوريوس /دبلوم	ثانوي	ثانوي	طالب	نعم	لا	ليس لدي شريك	لا	نعم	الإنترنت, التلفاز, المدرسة	نعم	نعم	ربما	نعم	نعم	لا	لا	لا	لا	لا	نعم	لا	نعم	ربما	ربما	لا	لا	لا	نعم	نعم	نعم	نعم	ربما	ربما	لا	لا
ذكر	18-25 سنة	أعزب\عزباء	أكثر من 12000 جنيه مصري	مدينة	جامعة بكالوريوس /دبلوم	جامعة بكالوريوس /دبلوم	جامعة بكالوريوس /دبلوم	عامل	نعم	لا	لا	لا	نعم	الإنترنت, المدرسة, الأهل	نعم	نعم	لا	نعم	نعم	لا	لا	لا	لا	لا	لا	لا	نعم	لا	لا	لا	لا	لا	نعم	نعم	نعم	نعم	ربما	ربما	لا	لا
ذكر	18-25 سنة	أعزب\عزباء	6000-12000 جنيه مصري	مدينة	جامعة بكالوريوس /دبلوم	جامعة بكالوريوس /دبلوم	جامعة بكالوريوس /دبلوم	طالب	نعم	لا	ليس لدي شريك	لا	نعم	الإنترنت, التلفاز, الأصدقاء, الصحف - الكتب - المجلات, أخرى	نعم	لا	ربما	نعم	نعم	لا	لا	لا	لا	لا	لا	لا	لا	لا	لا	لا	لا	ربما	نعم	نعم	نعم	نعم	ربما	ربما	لا	لا
أنثى	18-25 سنة	متزوج/ة	أقل من 6000 جنيه مصري	مدينة	جامعة بكالوريوس /دبلوم	ابتدائي	ابتدائي	عامل	نعم	لا	لا	لا	نعم	التلفاز	نعم	نعم	نعم	نعم	نعم	لا	لا	لا	لا	لا	ربما	لا	ربما	لا	نعم	لا	ربما	ربما	نعم	نعم	نعم	نعم	ربما	ربما	لا	لا
أنثى	18-25 سنة	أعزب\عزباء	أقل من 6000 جنيه مصري	مدينة	جامعة بكالوريوس /دبلوم	ابتدائي	جامعة بكالوريوس /دبلوم	عاطل عن العمل	لا	لا	ليس لدي شريك	لا	نعم	الأهل	نعم	ربما	لا	لا	نعم	لا	لا	لا	لا	لا	ربما	لا	ربما	ربما	ربما	لا	لا	ربما	نعم	نعم	نعم	نعم	ربما	ربما	لا	لا
ذكر	18-25 سنة	أعزب\عزباء	6000-12000 جنيه مصري	مدينة	جامعة بكالوريوس /دبلوم	ابتدائي	جامعة بكالوريوس /دبلوم	طالب	نعم	لا	ليس لدي شريك	لا	نعم	الإنترنت, المدرسة, الأصدقاء, الصحف - الكتب - المجلات	نعم	نعم	لا	لا	نعم	ربما	ربما	لا	لا	ربما	لا	لا	لا	لا	ربما	لا	لا	نعم	نعم	نعم	نعم	نعم	نعم	نعم	لا	لا
ذكر	18-25 سنة	أعزب\عزباء	6000-12000 جنيه مصري	مدينة	شهادات عليا	شهادات عليا	شهادات عليا	عامل	نعم	لا	لا	لا	نعم	الإنترنت, التلفاز, المدرسة, الأهل, الأصدقاء, الصحف - الكتب - المجلات, الطبيب	نعم	نعم	نعم	نعم	نعم	لا	لا	لا	لا	نعم	نعم	لا	ربما	ربما	ربما	لا	لا	ربما	نعم	نعم	نعم	نعم	نعم	نعم	لا	لا
أنثى	18-25 سنة	أعزب\عزباء	أقل من 6000 جنيه مصري	مدينة	جامعة بكالوريوس /دبلوم	جامعة بكالوريوس /دبلوم	ابتدائي	طالب	نعم	لا	ليس لدي شريك	لا	نعم	الإنترنت, التلفاز, الأهل	نعم	ربما	ربما	نعم	نعم	لا	لا	لا	لا	ربما	ربما	ربما	لا	ربما	ربما	ربما	لا	ربما	نعم	نعم	نعم	نعم	نعم	نعم	لا	لا
أنثى	18-25 سنة	أعزب\عزباء	6000-12000 جنيه مصري	مدينة	جامعة بكالوريوس /دبلوم	جامعة بكالوريوس /دبلوم	جامعة بكالوريوس /دبلوم	طالب	لا	نعم	لا	لا	نعم	الإنترنت, الأصدقاء	نعم	نعم	لا	نعم	نعم	لا	لا	لا	لا	لا	نعم	لا	ربما	لا	لا	ربما	لا	ربما	نعم	نعم	نعم	نعم	نعم	نعم	لا	لا
أنثى	18-25 سنة	أعزب\عزباء	6000-12000 جنيه مصري	مدينة	جامعة بكالوريوس /دبلوم	جامعة بكالوريوس /دبلوم	جامعة بكالوريوس /دبلوم	عامل	نعم	لا	ليس لدي شريك	لا	نعم	الإنترنت, التلفاز, الصحف - الكتب - المجلات	نعم	نعم	لا	لا	نعم	لا	لا	لا	لا	لا	لا	لا	ربما	لا	لا	لا	لا	لا	نعم	نعم	نعم	نعم	نعم	نعم	لا	لا
أنثى	18-25 سنة	أعزب\عزباء	أقل من 6000 جنيه مصري	مدينة	جامعة بكالوريوس /دبلوم	جامعة بكالوريوس /دبلوم	جامعة بكالوريوس /دبلوم	طالب	لا	لا	ليس لدي شريك	لا	نعم	الإنترنت, التلفاز	ربما	نعم	نعم	ربما	نعم	لا	لا	لا	لا	لا	لا	لا	ربما	لا	ربما	ربما	لا	لا	نعم	نعم	نعم	نعم	نعم	نعم	لا	لا
ذكر	18-25 سنة	أعزب\عزباء	6000-12000 جنيه مصري	مدينة	جامعة بكالوريوس /دبلوم	شهادات عليا	ابتدائي	عامل	نعم	لا	ليس لدي شريك	لا	نعم	الإنترنت, التلفاز, المدرسة, أخرى	ربما	نعم	نعم	لا	لا	لا	لا	لا	لا	لا	نعم	لا	نعم	لا	لا	لا	لا	نعم	نعم	نعم	نعم	نعم	نعم	نعم	نعم	نعم
ذكر	18-25 سنة	أعزب\عزباء	أقل من 6000 جنيه مصري	مدينة	جامعة بكالوريوس /دبلوم	ثانوي	ثانوي	طالب	نعم	لا	ليس لدي شريك	لا	نعم	المدرسة, الأهل, الأصدقاء, الصحف - الكتب - المجلات, الطبيب	نعم	لا	نعم	نعم	نعم	لا	لا	لا	لا	ربما	نعم	نعم	نعم	لا	لا	لا	لا	نعم	نعم	نعم	نعم	نعم	نعم	نعم	لا	لا
ذكر	18-25 سنة	أعزب\عزباء	6000-12000 جنيه مصري	مدينة	جامعة بكالوريوس /دبلوم	جامعة بكالوريوس /دبلوم	جامعة بكالوريوس /دبلوم	طالب	لا	لا	ليس لدي شريك	لا	نعم	الإنترنت, التلفاز, الصحف - الكتب - المجلات	نعم	ربما	ربما	لا	نعم	لا	لا	لا	لا	لا	لا	لا	لا	لا	لا	لا	لا	لا	نعم	نعم	نعم	نعم	نعم	نعم	لا	لا
أنثى	18-25 سنة	أعزب\عزباء	6000-12000 جنيه مصري	مدينة	جامعة بكالوريوس /دبلوم	جامعة بكالوريوس /دبلوم	جامعة بكالوريوس /دبلوم	طالب	لا	لا	لا	لا	نعم	الأهل	نعم	نعم	ربما	نعم	نعم	لا	لا	لا	لا	لا	لا	لا	لا	لا	لا	لا	لا	ربما	نعم	نعم	نعم	نعم	نعم	نعم	لا	لا
ذكر	18-25 سنة	أعزب\عزباء	6000-12000 جنيه مصري	مدينة	ثانوي	جامعة بكالوريوس /دبلوم	جامعة بكالوريوس /دبلوم	طالب	لا	نعم	ليس لدي شريك	لا	نعم	الأهل	نعم	ربما	ربما	ربما	نعم	لا	لا	لا	لا	ربما	لا	لا	لا	لا	لا	لا	لا	ربما	نعم	نعم	نعم	نعم	نعم	نعم	لا	لا
أنثى	18-25 سنة	أعزب\عزباء	6000-12000 جنيه مصري	مدينة	جامعة بكالوريوس /دبلوم	جامعة بكالوريوس /دبلوم	جامعة بكالوريوس /دبلوم	طالب	لا	لا	ليس لدي شريك	لا	نعم	الإنترنت, التلفاز	ربما	ربما	لا	نعم	نعم	لا	لا	لا	لا	لا	لا	لا	ربما	لا	ربما	لا	ربما	نعم	نعم	نعم	نعم	نعم	ربما	ربما	لا	لا
أنثى	18-25 سنة	أعزب\عزباء	أقل من 6000 جنيه مصري	مدينة	شهادات عليا	جامعة بكالوريوس /دبلوم	جامعة بكالوريوس /دبلوم	طالب	نعم	لا	ليس لدي شريك	لا	نعم	الإنترنت, التلفاز, الأهل, الأصدقاء	نعم	نعم	ربما	نعم	نعم	لا	لا	لا	لا	لا	لا	لا	لا	لا	لا	لا	لا	ربما	نعم	نعم	نعم	نعم	ربما	نعم	لا	لا
ذكر	18-25 سنة	أعزب\عزباء	6000-12000 جنيه مصري	مدينة	ثانوي	جامعة بكالوريوس /دبلوم	جامعة بكالوريوس /دبلوم	طالب	لا	لا	لا	لا	نعم	الإنترنت, التلفاز, المدرسة, الصحف - الكتب - المجلات	لا	ربما	ربما	ربما	نعم	لا	لا	لا	لا	لا	لا	لا	لا	لا	لا	لا	لا	ربما	نعم	نعم	نعم	نعم	نعم	نعم	لا	لا
أنثى	18-25 سنة	أعزب\عزباء	6000-12000 جنيه مصري	مدينة	جامعة بكالوريوس /دبلوم	جامعة بكالوريوس /دبلوم	جامعة بكالوريوس /دبلوم	عامل	لا	لا	ليس لدي شريك	لا	نعم	الإنترنت	نعم	نعم	لا	ربما	نعم	لا	لا	لا	لا	ربما	ربما	لا	ربما	لا	ربما	لا	ربما	ربما	نعم	نعم	نعم	نعم	ربما	نعم	لا	لا
أنثى	18-25 سنة	أعزب\عزباء	6000-12000 جنيه مصري	ريف	جامعة بكالوريوس /دبلوم	جامعة بكالوريوس /دبلوم	ثانوي	طالب	نعم	لا	ليس لدي شريك	لا	نعم	الإنترنت, الأهل	نعم	لا	لا	ربما	نعم	لا	لا	لا	لا	لا	ربما	لا	نعم	لا	ربما	لا	لا	نعم	نعم	نعم	نعم	نعم	ربما	نعم	لا	لا
أنثى	18-25 سنة	أعزب\عزباء	6000-12000 جنيه مصري	مدينة	جامعة بكالوريوس /دبلوم	ثانوي	ثانوي	طالب	نعم	لا	ليس لدي شريك	لا	نعم	الإنترنت	نعم	ربما	نعم	نعم	ربما	لا	لا	ربما	لا	لا	ربما	ربما	نعم	لا	لا	لا	لا	ربما	ربما	نعم	نعم	نعم	لا	لا	ربما	لا
ذكر	18-25 سنة	أعزب\عزباء	أقل من 6000 جنيه مصري	مدينة	جامعة بكالوريوس /دبلوم	جامعة بكالوريوس /دبلوم	جامعة بكالوريوس /دبلوم	طالب	نعم	لا	ليس لدي شريك	لا	نعم	الإنترنت	نعم	نعم	نعم	ربما	نعم	نعم	ربما	نعم	ربما	ربما	ربما	ربما	ربما	ربما	ربما	ربما	ربما	ربما	ربما	ربما	نعم	ربما	ربما	ربما	لا	لا
ذكر	18-25 سنة	أعزب\عزباء	أقل من 6000 جنيه مصري	مدينة	جامعة بكالوريوس /دبلوم	جامعة بكالوريوس /دبلوم	جامعة بكالوريوس /دبلوم	طالب	نعم	لا	ليس لدي شريك	لا	نعم	الإنترنت, المدرسة, الطبيب	نعم	نعم	لا	ربما	نعم	ربما	لا	لا	ربما	لا	ربما	ربما	ربما	ربما	ربما	ربما	ربما	ربما	نعم	نعم	نعم	ربما	نعم	نعم	لا	لا
أنثى	18-25 سنة	أعزب\عزباء	6000-12000 جنيه مصري	مدينة	جامعة بكالوريوس /دبلوم	جامعة بكالوريوس /دبلوم	جامعة بكالوريوس /دبلوم	طالب	نعم	لا	ليس لدي شريك	لا	نعم	الإنترنت, التلفاز, الأهل, الأصدقاء, الصحف - الكتب - المجلات	نعم	نعم	ربما	نعم	نعم	لا	لا	لا	لا	لا	لا	لا	ربما	لا	ربما	لا	لا	ربما	نعم	نعم	نعم	نعم	نعم	نعم	لا	لا
أنثى	18-25 سنة	أعزب\عزباء	أقل من 6000 جنيه مصري	مدينة	شهادات عليا	جامعة بكالوريوس /دبلوم	جامعة بكالوريوس /دبلوم	عامل	لا	لا	ليس لدي شريك	لا	نعم	الإنترنت, التلفاز, المدرسة, أخرى	نعم	نعم	ربما	ربما	نعم	لا	لا	لا	لا	لا	لا	لا	ربما	لا	ربما	لا	لا	ربما	ربما	نعم	نعم	نعم	ربما	ربما	لا	لا
ذكر	18-25 سنة	أعزب\عزباء	6000-12000 جنيه مصري	مدينة	جامعة بكالوريوس /دبلوم	جامعة بكالوريوس /دبلوم	ابتدائي	طالب	لا	لا	لا	لا	نعم	الإنترنت, التلفاز	نعم	ربما	نعم	نعم	نعم	لا	لا	لا	لا	لا	ربما	ربما	لا	لا	لا	لا	لا	نعم	نعم	نعم	نعم	نعم	ربما	ربما	لا	لا
أنثى	18-25 سنة	أعزب\عزباء	أقل من 6000 جنيه مصري	مدينة	جامعة بكالوريوس /دبلوم	جامعة بكالوريوس /دبلوم	ثانوي	طالب	نعم	لا	لا	لا	نعم	الإنترنت	نعم	نعم	نعم	ربما	نعم	نعم	لا	نعم	ربما	لا	لا	لا	لا	لا	لا	لا	ربما	لا	نعم	نعم	نعم	نعم	نعم	نعم	لا	لا
ذكر	18-25 سنة	أعزب\عزباء	أقل من 6000 جنيه مصري	مدينة	جامعة بكالوريوس /دبلوم	ثانوي	جامعة بكالوريوس /دبلوم	متقاعد	نعم	لا	ليس لدي شريك	لا	نعم	الإنترنت, التلفاز, الأصدقاء, أخرى	نعم	نعم	لا	نعم	نعم	لا	لا	لا	لا	لا	نعم	لا	نعم	ربما	ربما	لا	ربما	ربما	نعم	نعم	نعم	ربما	ربما	ربما	لا	لا
ذكر	18-25 سنة	أعزب\عزباء	6000-12000 جنيه مصري	ريف	جامعة بكالوريوس /دبلوم	جامعة بكالوريوس /دبلوم	جامعة بكالوريوس /دبلوم	طالب	لا	لا	لا	لا	نعم	الإنترنت, الأهل, أخرى	نعم	نعم	نعم	نعم	نعم	نعم	لا	لا	لا	لا	لا	لا	نعم	نعم	نعم	نعم	نعم	لا	نعم	ربما	ربما	ربما	لا	لا	لا	لا
ذكر	18-25 سنة	أعزب\عزباء	6000-12000 جنيه مصري	ريف	جامعة بكالوريوس /دبلوم	ابتدائي	ابتدائي	عامل	لا	لا	لا	لا	نعم	الإنترنت, التلفاز, المدرسة	نعم	نعم	ربما	ربما	نعم	ربما	ربما	نعم	لا	ربما	ربما	ربما	ربما	ربما	ربما	لا	ربما	لا	نعم	نعم	نعم	نعم	ربما	ربما	لا	لا
أنثى	18-25 سنة	أعزب\عزباء	6000-12000 جنيه مصري	مدينة	جامعة بكالوريوس /دبلوم	جامعة بكالوريوس /دبلوم	جامعة بكالوريوس /دبلوم	طالب	نعم	لا	ليس لدي شريك	لا	نعم	الإنترنت, التلفاز	ربما	ربما	نعم	لا	نعم	لا	لا	لا	لا	لا	ربما	لا	لا	لا	ربما	لا	ربما	لا	نعم	نعم	ربما	ربما	ربما	ربما	لا	لا
ذكر	18-25 سنة	أعزب\عزباء	6000-12000 جنيه مصري	مدينة	جامعة بكالوريوس /دبلوم	جامعة بكالوريوس /دبلوم	جامعة بكالوريوس /دبلوم	عامل	لا	لا	ليس لدي شريك	لا	نعم	الإنترنت, الأهل, الأصدقاء, الطبيب	ربما	لا	لا	ربما	ربما	لا	لا	لا	لا	ربما	لا	ربما	ربما	لا	لا	ربما	لا	ربما	نعم	نعم	ربما	ربما	ربما	ربما	لا	لا
أنثى	18-25 سنة	أعزب\عزباء	6000-12000 جنيه مصري	مدينة	جامعة بكالوريوس /دبلوم	جامعة بكالوريوس /دبلوم	جامعة بكالوريوس /دبلوم	طالب	نعم	لا	ليس لدي شريك	لا	نعم	الإنترنت, الأهل, الصحف - الكتب - المجلات	ربما	نعم	ربما	نعم	نعم	لا	لا	لا	لا	لا	ربما	ربما	لا	ربما	نعم	لا	لا	ربما	نعم	نعم	نعم	نعم	ربما	ربما	لا	لا
أنثى	18-25 سنة	أعزب\عزباء	أقل من 6000 جنيه مصري	مدينة	جامعة بكالوريوس /دبلوم	جامعة بكالوريوس /دبلوم	جامعة بكالوريوس /دبلوم	عامل	لا	لا	ليس لدي شريك	لا	نعم	الإنترنت, التلفاز, الصحف - الكتب - المجلات	نعم	نعم	ربما	لا	ربما	لا	لا	لا	لا	لا	لا	لا	ربما	لا	نعم	لا	لا	ربما	نعم	نعم	نعم	نعم	نعم	نعم	لا	لا
أنثى	18-25 سنة	أعزب\عزباء	6000-12000 جنيه مصري	مدينة	جامعة بكالوريوس /دبلوم	جامعة بكالوريوس /دبلوم	جامعة بكالوريوس /دبلوم	طالب	نعم	لا	ليس لدي شريك	لا	نعم	الإنترنت, المدرسة, الأصدقاء	نعم	نعم	ربما	لا	نعم	ربما	ربما	ربما	ربما	ربما	ربما	ربما	نعم	لا	ربما	لا	لا	ربما	نعم	نعم	نعم	نعم	نعم	نعم	لا	لا
أنثى	18-25 سنة	أعزب\عزباء	6000-12000 جنيه مصري	مدينة	جامعة بكالوريوس /دبلوم	جامعة بكالوريوس /دبلوم	جامعة بكالوريوس /دبلوم	طالب	نعم	لا	ليس لدي شريك	لا	نعم	الإنترنت, التلفاز	نعم	نعم	نعم	نعم	نعم	لا	لا	لا	لا	لا	لا	لا	لا	لا	لا	لا	لا	ربما	نعم	نعم	نعم	نعم	نعم	نعم	لا	لا
أنثى	18-25 سنة	أعزب\عزباء	6000-12000 جنيه مصري	مدينة	جامعة بكالوريوس /دبلوم	جامعة بكالوريوس /دبلوم	جامعة بكالوريوس /دبلوم	طالب	نعم	لا	ليس لدي شريك	لا	نعم	الإنترنت	نعم	نعم	لا	ربما	نعم	لا	لا	لا	لا	ربما	ربما	ربما	نعم	ربما	ربما	لا	لا	نعم	نعم	نعم	نعم	نعم	نعم	نعم	لا	لا
أنثى	18-25 سنة	أعزب\عزباء	أقل من 6000 جنيه مصري	مدينة	جامعة بكالوريوس /دبلوم	جامعة بكالوريوس /دبلوم	جامعة بكالوريوس /دبلوم	طالب	نعم	لا	ليس لدي شريك	لا	نعم	الأصدقاء, الصحف - الكتب - المجلات, الطبيب	نعم	نعم	ربما	نعم	نعم	لا	لا	لا	ربما	لا	ربما	لا	نعم	لا	ربما	لا	ربما	لا	ربما	نعم	نعم	نعم	ربما	ربما	ربما	ربما
أنثى	18-25 سنة	أعزب\عزباء	أقل من 6000 جنيه مصري	مدينة	جامعة بكالوريوس /دبلوم	جامعة بكالوريوس /دبلوم	جامعة بكالوريوس /دبلوم	طالب	لا	لا	لا	لا	نعم	الإنترنت, التلفاز	نعم	لا	ربما	نعم	نعم	لا	لا	لا	لا	لا	لا	لا	نعم	لا	لا	لا	لا	ربما	نعم	نعم	نعم	نعم	نعم	نعم	لا	نعم
أنثى	18-25 سنة	أعزب\عزباء	6000-12000 جنيه مصري	ريف	جامعة بكالوريوس /دبلوم	جامعة بكالوريوس /دبلوم	جامعة بكالوريوس /دبلوم	طالب	نعم	لا	ليس لدي شريك	لا	نعم	الإنترنت, التلفاز, المدرسة, الأصدقاء, الصحف - الكتب - المجلات	ربما	ربما	ربما	نعم	نعم	لا	لا	لا	لا	ربما	ربما	ربما	ربما	لا	ربما	ربما	لا	نعم	نعم	نعم	نعم	نعم	نعم	نعم	ربما	لا
ذكر	18-25 سنة	أعزب\عزباء	6000-12000 جنيه مصري	مدينة	جامعة بكالوريوس /دبلوم	جامعة بكالوريوس /دبلوم	جامعة بكالوريوس /دبلوم	عامل	نعم	لا	ليس لدي شريك	لا	نعم	الإنترنت, التلفاز, الصحف - الكتب - المجلات	نعم	لا	ربما	لا	نعم	لا	لا	لا	لا	لا	لا	لا	لا	لا	لا	لا	لا	لا	نعم	نعم	نعم	نعم	ربما	ربما	ربما	لا
ذكر	18-25 سنة	أعزب\عزباء	أكثر من 12000 جنيه مصري	مدينة	جامعة بكالوريوس /دبلوم	شهادات عليا	جامعة بكالوريوس /دبلوم	عاطل عن العمل	لا	نعم	لا	لا	نعم	الأهل	نعم	نعم	لا	نعم	نعم	لا	لا	لا	لا	لا	نعم	نعم	لا	لا	لا	لا	لا	ربما	نعم	نعم	نعم	نعم	ربما	نعم	لا	لا
ذكر	18-25 سنة	أعزب\عزباء	أكثر من 12000 جنيه مصري	مدينة	جامعة بكالوريوس /دبلوم	جامعة بكالوريوس /دبلوم	ثانوي	طالب	لا	لا	ليس لدي شريك	لا	نعم	الإنترنت	نعم	نعم	ربما	نعم	نعم	ربما	ربما	ربما	ربما	ربما	لا	ربما	نعم	ربما	ربما	لا	ربما	ربما	نعم	نعم	نعم	نعم	نعم	نعم	لا	لا
أنثى	18-25 سنة	أعزب\عزباء	أكثر من 12000 جنيه مصري	مدينة	جامعة بكالوريوس /دبلوم	جامعة بكالوريوس /دبلوم	جامعة بكالوريوس /دبلوم	طالب	نعم	لا	ليس لدي شريك	لا	نعم	الإنترنت, التلفاز	نعم	نعم	ربما	ربما	نعم	لا	لا	لا	لا	لا	لا	لا	لا	لا	لا	لا	لا	ربما	نعم	نعم	نعم	نعم	ربما	ربما	لا	لا
أنثى	18-25 سنة	أعزب\عزباء	6000-12000 جنيه مصري	مدينة	شهادات عليا	شهادات عليا	ثانوي	عاطل عن العمل	نعم	لا	لا	لا	نعم	الإنترنت	نعم	لا	ربما	ربما	لا	لا	لا	لا	لا	لا	لا	لا	ربما	لا	لا	لا	لا	لا	نعم	نعم	نعم	نعم	نعم	نعم	لا	لا
ذكر	18-25 سنة	أعزب\عزباء	أكثر من 12000 جنيه مصري	مدينة	جامعة بكالوريوس /دبلوم	جامعة بكالوريوس /دبلوم	جامعة بكالوريوس /دبلوم	طالب	نعم	لا	لا	لا	نعم	الإنترنت, التلفاز, المدرسة, الأهل, الأصدقاء	نعم	لا	لا	لا	نعم	لا	ربما	ربما	لا	لا	لا	لا	ربما	لا	لا	لا	لا	نعم	نعم	نعم	نعم	نعم	نعم	نعم	لا	لا
أنثى	18-25 سنة	متزوج/ة	أكثر من 12000 جنيه مصري	مدينة	جامعة بكالوريوس /دبلوم	جامعة بكالوريوس /دبلوم	جامعة بكالوريوس /دبلوم	مربية منزل	نعم	لا	لا	لا	نعم	الإنترنت, التلفاز, المدرسة, الأصدقاء	نعم	نعم	لا	لا	نعم	لا	لا	لا	لا	لا	لا	لا	لا	لا	لا	لا	لا	نعم	نعم	نعم	نعم	نعم	نعم	نعم	لا	لا
أنثى	18-25 سنة	أعزب\عزباء	6000-12000 جنيه مصري	مدينة	جامعة بكالوريوس /دبلوم	جامعة بكالوريوس /دبلوم	جامعة بكالوريوس /دبلوم	عامل	لا	لا	ليس لدي شريك	لا	نعم	الإنترنت, الأهل, الصحف - الكتب - المجلات	نعم	نعم	نعم	ربما	نعم	لا	لا	لا	لا	لا	لا	لا	نعم	لا	ربما	لا	لا	ربما	نعم	نعم	نعم	نعم	ربما	ربما	ربما	لا
ذكر	18-25 سنة	أعزب\عزباء	أكثر من 12000 جنيه مصري	مدينة	جامعة بكالوريوس /دبلوم	جامعة بكالوريوس /دبلوم	ثانوي	طالب	نعم	لا	ليس لدي شريك	لا	نعم	الأهل	نعم	لا	لا	لا	نعم	لا	لا	لا	لا	لا	لا	لا	نعم	لا	لا	لا	لا	ربما	نعم	نعم	نعم	نعم	نعم	نعم	لا	لا
أنثى	18-25 سنة	أعزب\عزباء	أقل من 6000 جنيه مصري	مدينة	جامعة بكالوريوس /دبلوم	جامعة بكالوريوس /دبلوم	جامعة بكالوريوس /دبلوم	متقاعد	لا	لا	ليس لدي شريك	لا	نعم	الأصدقاء	نعم	لا	نعم	نعم	نعم	لا	لا	لا	لا	لا	لا	لا	نعم	لا	لا	لا	لا	ربما	نعم	نعم	نعم	نعم	ربما	نعم	لا	لا
أنثى	18-25 سنة	أعزب\عزباء	6000-12000 جنيه مصري	مدينة	جامعة بكالوريوس /دبلوم	جامعة بكالوريوس /دبلوم	جامعة بكالوريوس /دبلوم	طالب	نعم	لا	ليس لدي شريك	لا	نعم	الإنترنت, التلفاز	نعم	نعم	لا	نعم	نعم	لا	لا	لا	لا	لا	ربما	لا	ربما	لا	ربما	لا	لا	ربما	نعم	نعم	نعم	نعم	ربما	ربما	لا	لا
ذكر	18-25 سنة	أعزب\عزباء	أقل من 6000 جنيه مصري	مدينة	جامعة بكالوريوس /دبلوم	جامعة بكالوريوس /دبلوم	جامعة بكالوريوس /دبلوم	طالب	نعم	لا	لا	لا	نعم	الإنترنت	نعم	لا	لا	ربما	نعم	لا	لا	لا	لا	لا	لا	لا	نعم	لا	لا	لا	لا	لا	نعم	نعم	نعم	نعم	نعم	نعم	لا	لا
أنثى	18-25 سنة	أعزب\عزباء	أقل من 6000 جنيه مصري	مدينة	ثانوي	شهادات عليا	جامعة بكالوريوس /دبلوم	طالب	لا	لا	ليس لدي شريك	لا	نعم	الإنترنت, التلفاز	نعم	نعم	نعم	لا	ربما	لا	ربما	لا	ربما	لا	ربما	ربما	ربما	ربما	لا	لا	ربما	ربما	نعم	نعم	نعم	نعم	نعم	نعم	لا	لا
أنثى	18-25 سنة	أعزب\عزباء	6000-12000 جنيه مصري	مدينة	جامعة بكالوريوس /دبلوم	جامعة بكالوريوس /دبلوم	جامعة بكالوريوس /دبلوم	طالب	نعم	لا	لا	لا	نعم	الإنترنت	نعم	نعم	نعم	لا	نعم	نعم	ربما	ربما	لا	نعم	نعم	لا	ربما	لا	لا	لا	ربما	ربما	نعم	نعم	نعم	نعم	نعم	نعم	لا	لا
أنثى	18-25 سنة	أعزب\عزباء	6000-12000 جنيه مصري	مدينة	جامعة بكالوريوس /دبلوم	جامعة بكالوريوس /دبلوم	جامعة بكالوريوس /دبلوم	طالب	نعم	نعم	ليس لدي شريك	لا	نعم	الأهل	نعم	نعم	نعم	نعم	نعم	لا	لا	لا	لا	لا	نعم	لا	ربما	لا	لا	لا	لا	ربما	نعم	نعم	نعم	نعم	ربما	ربما	لا	لا
أنثى	18-25 سنة	أعزب\عزباء	6000-12000 جنيه مصري	مدينة	جامعة بكالوريوس /دبلوم	جامعة بكالوريوس /دبلوم	جامعة بكالوريوس /دبلوم	طالب	لا	لا	لا	لا	نعم	الإنترنت	نعم	ربما	نعم	ربما	نعم	ربما	لا	لا	لا	لا	ربما	لا	ربما	لا	ربما	لا	لا	ربما	نعم	نعم	نعم	نعم	نعم	نعم	لا	لا
أنثى	18-25 سنة	أعزب\عزباء	أقل من 6000 جنيه مصري	مدينة	جامعة بكالوريوس /دبلوم	ثانوي	ثانوي	طالب	لا	لا	لا	لا	نعم	الإنترنت	نعم	نعم	لا	لا	نعم	لا	لا	ربما	ربما	لا	لا	لا	نعم	لا	لا	لا	لا	ربما	نعم	نعم	نعم	نعم	نعم	ربما	لا	لا
أنثى	18-25 سنة	أعزب\عزباء	أقل من 6000 جنيه مصري	مدينة	جامعة بكالوريوس /دبلوم	جامعة بكالوريوس /دبلوم	جامعة بكالوريوس /دبلوم	عامل	لا	لا	لا	لا	نعم	الإنترنت, التلفاز, المدرسة, الأهل, الأصدقاء, الصحف - الكتب - المجلات	نعم	نعم	لا	لا	نعم	لا	لا	لا	لا	لا	لا	لا	ربما	لا	لا	لا	لا	ربما	نعم	نعم	نعم	نعم	نعم	نعم	لا	لا
ذكر	18-25 سنة	أعزب\عزباء	أقل من 6000 جنيه مصري	مدينة	جامعة بكالوريوس /دبلوم	ثانوي	ثانوي	عامل	نعم	لا	ليس لدي شريك	لا	نعم	الإنترنت, التلفاز, المدرسة, الأهل	لا	ربما	لا	لا	نعم	لا	لا	لا	لا	لا	ربما	لا	ربما	لا	ربما	لا	لا	ربما	نعم	نعم	نعم	نعم	ربما	لا	لا	لا
ذكر	26-35 سنة	أعزب\عزباء	6000-12000 جنيه مصري	ريف	جامعة بكالوريوس /دبلوم	جامعة بكالوريوس /دبلوم	جامعة بكالوريوس /دبلوم	عاطل عن العمل	نعم	لا	ليس لدي شريك	لا	نعم	الإنترنت, التلفاز, المدرسة, الأهل, الأصدقاء, الصحف - الكتب - المجلات, الطبيب, أخرى	نعم	لا	ربما	لا	نعم	لا	لا	لا	لا	لا	لا	لا	لا	لا	لا	لا	لا	ربما	نعم	نعم	نعم	نعم	نعم	نعم	لا	لا
أنثى	18-25 سنة	أعزب\عزباء	6000-12000 جنيه مصري	مدينة	جامعة بكالوريوس /دبلوم	ثانوي	ثانوي	طالب	لا	لا	لا	لا	نعم	الإنترنت	نعم	نعم	ربما	ربما	نعم	لا	لا	لا	لا	ربما	ربما	ربما	لا	لا	ربما	ربما	ربما	لا	نعم	نعم	نعم	نعم	ربما	نعم	لا	لا
أنثى	18-25 سنة	أعزب\عزباء	أقل من 6000 جنيه مصري	مدينة	جامعة بكالوريوس /دبلوم	ابتدائي	ثانوي	متقاعد	لا	لا	ليس لدي شريك	لا	نعم	الإنترنت, التلفاز	ربما	ربما	لا	نعم	ربما	لا	لا	لا	لا	لا	لا	لا	لا	لا	لا	لا	لا	ربما	نعم	نعم	نعم	نعم	نعم	نعم	لا	لا
أنثى	18-25 سنة	أعزب\عزباء	6000-12000 جنيه مصري	مدينة	جامعة بكالوريوس /دبلوم	جامعة بكالوريوس /دبلوم	جامعة بكالوريوس /دبلوم	طالب	نعم	لا	ليس لدي شريك	لا	نعم	الإنترنت, التلفاز	ربما	نعم	لا	نعم	نعم	لا	لا	لا	لا	ربما	نعم	لا	لا	لا	لا	ربما	لا	ربما	نعم	نعم	نعم	نعم	ربما	نعم	لا	لا
أنثى	18-25 سنة	أعزب\عزباء	6000-12000 جنيه مصري	مدينة	جامعة بكالوريوس /دبلوم	جامعة بكالوريوس /دبلوم	جامعة بكالوريوس /دبلوم	طالب	نعم	لا	لا	لا	نعم	الإنترنت	نعم	نعم	لا	ربما	نعم	لا	لا	لا	لا	لا	ربما	لا	ربما	لا	لا	ربما	لا	نعم	نعم	نعم	نعم	ربما	ربما	لا	ربما	لا
أنثى	18-25 سنة	أعزب\عزباء	أقل من 6000 جنيه مصري	مدينة	جامعة بكالوريوس /دبلوم	شهادات عليا	شهادات عليا	طالب	نعم	لا	لا	لا	نعم	الأصدقاء	نعم	نعم	نعم	لا	نعم	لا	لا	لا	لا	لا	لا	لا	نعم	لا	لا	ربما	لا	لا	نعم	نعم	نعم	نعم	نعم	نعم	لا	لا
أنثى	18-25 سنة	أعزب\عزباء	6000-12000 جنيه مصري	مدينة	جامعة بكالوريوس /دبلوم	جامعة بكالوريوس /دبلوم	جامعة بكالوريوس /دبلوم	طالب	لا	لا	لا	لا	نعم	الإنترنت, التلفاز, الأهل, الصحف - الكتب - المجلات, أخرى	نعم	نعم	لا	نعم	نعم	لا	لا	لا	لا	لا	نعم	لا	لا	لا	نعم	لا	لا	نعم	نعم	نعم	نعم	نعم	نعم	نعم	لا	لا
أنثى	18-25 سنة	أعزب\عزباء	6000-12000 جنيه مصري	مدينة	جامعة بكالوريوس /دبلوم	جامعة بكالوريوس /دبلوم	ابتدائي	طالب	نعم	لا	لا	لا	نعم	الصحف - الكتب - المجلات	نعم	لا	لا	لا	نعم	لا	لا	لا	لا	لا	لا	لا	نعم	لا	لا	لا	لا	ربما	نعم	نعم	نعم	نعم	نعم	نعم	لا	لا
أنثى	26-35 سنة	أعزب\عزباء	6000-12000 جنيه مصري	مدينة	جامعة بكالوريوس /دبلوم	ثانوي	ابتدائي	طالب	لا	لا	ليس لدي شريك	لا	نعم	الإنترنت, التلفاز	نعم	نعم	لا	ربما	نعم	لا	لا	لا	لا	لا	ربما	لا	ربما	لا	ربما	لا	لا	نعم	نعم	نعم	نعم	نعم	ربما	ربما	لا	لا
أنثى	18-25 سنة	أعزب\عزباء	أكثر من 12000 جنيه مصري	مدينة	جامعة بكالوريوس /دبلوم	جامعة بكالوريوس /دبلوم	جامعة بكالوريوس /دبلوم	عامل	نعم	لا	ليس لدي شريك	لا	نعم	الإنترنت, التلفاز	نعم	ربما	ربما	نعم	نعم	لا	لا	لا	لا	لا	لا	لا	نعم	لا	لا	لا	لا	لا	نعم	نعم	نعم	ربما	ربما	ربما	لا	لا
أنثى	18-25 سنة	أعزب\عزباء	أقل من 6000 جنيه مصري	مدينة	جامعة بكالوريوس /دبلوم	جامعة بكالوريوس /دبلوم	ابتدائي	طالب	لا	لا	ليس لدي شريك	لا	نعم	الإنترنت, المدرسة, الأهل	نعم	ربما	لا	نعم	نعم	لا	لا	لا	لا	لا	ربما	لا	لا	ربما	ربما	لا	لا	ربما	نعم	نعم	نعم	نعم	نعم	نعم	لا	لا
أنثى	18-25 سنة	أعزب\عزباء	أقل من 6000 جنيه مصري	ريف	جامعة بكالوريوس /دبلوم	جامعة بكالوريوس /دبلوم	جامعة بكالوريوس /دبلوم	طالب	لا	لا	لا	لا	نعم	الإنترنت	ربما	لا	لا	ربما	نعم	لا	لا	لا	لا	لا	ربما	لا	نعم	لا	ربما	لا	لا	لا	نعم	نعم	نعم	نعم	لا	لا	ربما	لا
أنثى	26-35 سنة	متزوج/ة	6000-12000 جنيه مصري	مدينة	شهادات عليا	جامعة بكالوريوس /دبلوم	جامعة بكالوريوس /دبلوم	عامل	لا	لا	ليس لدي شريك	لا	نعم	الأهل	نعم	نعم	لا	نعم	نعم	لا	لا	لا	لا	لا	لا	لا	نعم	لا	لا	لا	لا	ربما	ربما	ربما	ربما	ربما	ربما	ربما	ربما	ربما
أنثى	18-25 سنة	أعزب\عزباء	6000-12000 جنيه مصري	مدينة	جامعة بكالوريوس /دبلوم	جامعة بكالوريوس /دبلوم	جامعة بكالوريوس /دبلوم	طالب	لا	لا	ليس لدي شريك	لا	نعم	الإنترنت, التلفاز	نعم	نعم	لا	ربما	نعم	لا	لا	ربما	لا	لا	ربما	لا	لا	لا	ربما	لا	لا	ربما	نعم	نعم	نعم	نعم	ربما	ربما	لا	لا
أنثى	18-25 سنة	أعزب\عزباء	6000-12000 جنيه مصري	مدينة	جامعة بكالوريوس /دبلوم	جامعة بكالوريوس /دبلوم	جامعة بكالوريوس /دبلوم	طالب	نعم	لا	ليس لدي شريك	لا	نعم	الإنترنت, الأصدقاء	نعم	لا	لا	لا	نعم	لا	ربما	ربما	ربما	لا	ربما	لا	نعم	لا	لا	لا	لا	لا	نعم	نعم	نعم	ربما	ربما	ربما	لا	لا
أنثى	18-25 سنة	أعزب\عزباء	6000-12000 جنيه مصري	مدينة	جامعة بكالوريوس /دبلوم	جامعة بكالوريوس /دبلوم	جامعة بكالوريوس /دبلوم	طالب	نعم	نعم	لا	نعم	نعم	الأصدقاء, الطبيب	نعم	نعم	نعم	نعم	نعم	لا	لا	لا	لا	لا	نعم	ربما	ربما	لا	ربما	لا	لا	نعم	نعم	نعم	نعم	نعم	لا	لا	لا	لا
ذكر	18-25 سنة	أعزب\عزباء	أقل من 6000 جنيه مصري	مدينة	جامعة بكالوريوس /دبلوم	ثانوي	ثانوي	عامل	نعم	لا	لا	لا	نعم	الإنترنت, التلفاز, المدرسة, الأهل, الأصدقاء, الصحف - الكتب - المجلات, الطبيب	لا	لا	نعم	لا	نعم	لا	لا	لا	لا	لا	لا	لا	لا	لا	لا	لا	لا	لا	نعم	نعم	نعم	نعم	لا	لا	نعم	لا
أنثى	18-25 سنة	أعزب\عزباء	أقل من 6000 جنيه مصري	مدينة	جامعة بكالوريوس /دبلوم	ثانوي	ثانوي	طالب	نعم	لا	لا	لا	نعم	الإنترنت	لا	نعم	لا	نعم	نعم	لا	لا	لا	لا	لا	لا	لا	لا	لا	لا	لا	لا	لا	نعم	نعم	نعم	نعم	نعم	نعم	لا	لا
أنثى	18-25 سنة	أعزب\عزباء	أقل من 6000 جنيه مصري	مدينة	جامعة بكالوريوس /دبلوم	جامعة بكالوريوس /دبلوم	جامعة بكالوريوس /دبلوم	طالب	نعم	لا	ليس لدي شريك	لا	نعم	الإنترنت, التلفاز, المدرسة, الأهل, الأصدقاء, الصحف - الكتب - المجلات, الطبيب, أخرى	نعم	نعم	ربما	ربما	نعم	ربما	ربما	ربما	لا	لا	ربما	لا	ربما	ربما	ربما	ربما	لا	ربما	نعم	نعم	نعم	نعم	ربما	ربما	لا	لا
أنثى	26-35 سنة	متزوج/ة	6000-12000 جنيه مصري	مدينة	جامعة بكالوريوس /دبلوم	جامعة بكالوريوس /دبلوم	جامعة بكالوريوس /دبلوم	مربية منزل	نعم	لا	لا	لا	نعم	الأهل	نعم	لا	لا	لا	نعم	لا	لا	لا	لا	لا	لا	لا	لا	لا	لا	لا	لا	لا	نعم	نعم	نعم	نعم	نعم	نعم	لا	لا
أنثى	18-25 سنة	أعزب\عزباء	6000-12000 جنيه مصري	مدينة	جامعة بكالوريوس /دبلوم	جامعة بكالوريوس /دبلوم	جامعة بكالوريوس /دبلوم	طالب	نعم	لا	لا	لا	نعم	التلفاز	ربما	ربما	نعم	ربما	نعم	ربما	ربما	نعم	ربما	لا	ربما	ربما	ربما	ربما	لا	ربما	لا	ربما	ربما	ربما	ربما	لا	لا	لا	ربما	لا
أنثى	18-25 سنة	أعزب\عزباء	أقل من 6000 جنيه مصري	مدينة	جامعة بكالوريوس /دبلوم	ثانوي	ثانوي	طالب	لا	لا	ليس لدي شريك	لا	نعم	الإنترنت, التلفاز, المدرسة, الأهل, الأصدقاء, الصحف - الكتب - المجلات	ربما	ربما	ربما	لا	نعم	لا	لا	لا	لا	لا	ربما	لا	ربما	لا	لا	لا	لا	ربما	نعم	نعم	نعم	نعم	ربما	ربما	ربما	لا
أنثى	26-35 سنة	متزوج/ة	6000-12000 جنيه مصري	مدينة	جامعة بكالوريوس /دبلوم	جامعة بكالوريوس /دبلوم	جامعة بكالوريوس /دبلوم	مربية منزل	نعم	لا	لا	لا	نعم	الأهل	نعم	لا	لا	لا	نعم	لا	لا	لا	لا	لا	لا	لا	لا	لا	لا	لا	لا	ربما	نعم	نعم	نعم	نعم	نعم	نعم	لا	لا
أنثى	18-25 سنة	أعزب\عزباء	أقل من 6000 جنيه مصري	مدينة	جامعة بكالوريوس /دبلوم	ثانوي	ابتدائي	طالب	لا	لا	ليس لدي شريك	لا	نعم	الإنترنت	ربما	نعم	ربما	نعم	نعم	لا	لا	لا	لا	لا	ربما	ربما	ربما	ربما	لا	لا	لا	نعم	نعم	نعم	نعم	نعم	ربما	ربما	لا	لا
ذكر	18-25 سنة	أعزب\عزباء	أكثر من 12000 جنيه مصري	مدينة	شهادات عليا	جامعة بكالوريوس /دبلوم	جامعة بكالوريوس /دبلوم	عامل	نعم	لا	لا	لا	نعم	الأهل	نعم	ربما	نعم	ربما	نعم	لا	لا	لا	لا	لا	نعم	لا	ربما	لا	لا	لا	لا	لا	نعم	نعم	نعم	نعم	نعم	نعم	لا	لا
أنثى	18-25 سنة	أعزب\عزباء	أقل من 6000 جنيه مصري	مدينة	جامعة بكالوريوس /دبلوم	جامعة بكالوريوس /دبلوم	جامعة بكالوريوس /دبلوم	طالب	نعم	لا	لا	لا	نعم	الإنترنت, التلفاز, المدرسة, الصحف - الكتب - المجلات	نعم	نعم	ربما	ربما	نعم	لا	لا	لا	لا	لا	ربما	لا	ربما	لا	لا	لا	لا	ربما	نعم	نعم	نعم	نعم	نعم	نعم	لا	لا
أنثى	18-25 سنة	أعزب\عزباء	أكثر من 12000 جنيه مصري	مدينة	جامعة بكالوريوس /دبلوم	ثانوي	جامعة بكالوريوس /دبلوم	طالب	نعم	لا	لا	لا	نعم	الإنترنت, التلفاز, الأهل, الأصدقاء	نعم	ربما	ربما	ربما	نعم	لا	لا	لا	لا	لا	لا	لا	ربما	لا	لا	لا	لا	ربما	نعم	نعم	نعم	نعم	لا	لا	لا	لا
ذكر	18-25 سنة	أعزب\عزباء	6000-12000 جنيه مصري	مدينة	جامعة بكالوريوس /دبلوم	جامعة بكالوريوس /دبلوم	جامعة بكالوريوس /دبلوم	طالب	نعم	لا	لا	لا	نعم	الإنترنت	نعم	ربما	نعم	نعم	نعم	لا	لا	لا	لا	ربما	ربما	لا	ربما	لا	نعم	نعم	لا	لا	نعم	نعم	نعم	نعم	نعم	نعم	لا	لا
أنثى	26-35 سنة	أعزب\عزباء	6000-12000 جنيه مصري	مدينة	جامعة بكالوريوس /دبلوم	جامعة بكالوريوس /دبلوم	جامعة بكالوريوس /دبلوم	متقاعد	نعم	لا	لا	لا	نعم	الصحف - الكتب - المجلات	نعم	نعم	نعم	لا	نعم	نعم	لا	نعم	نعم	نعم	لا	لا	لا	نعم	لا	لا	لا	نعم	لا	لا	لا	لا	لا	لا	لا	نعم
أنثى	18-25 سنة	أعزب\عزباء	6000-12000 جنيه مصري	ريف	جامعة بكالوريوس /دبلوم	جامعة بكالوريوس /دبلوم	جامعة بكالوريوس /دبلوم	طالب	لا	لا	لا	لا	نعم	الإنترنت, التلفاز, المدرسة, الأهل	نعم	لا	لا	لا	ربما	لا	لا	لا	لا	لا	لا	لا	لا	لا	لا	لا	لا	لا	نعم	نعم	نعم	نعم	ربما	ربما	لا	لا
أنثى	18-25 سنة	أعزب\عزباء	أقل من 6000 جنيه مصري	مدينة	جامعة بكالوريوس /دبلوم	ابتدائي	ابتدائي	مربية منزل	لا	لا	ليس لدي شريك	لا	نعم	التلفاز, المدرسة, الأهل	نعم	ربما	ربما	ربما	نعم	لا	لا	لا	لا	لا	ربما	لا	لا	لا	لا	لا	لا	لا	نعم	نعم	نعم	نعم	نعم	نعم	لا	لا
ذكر	18-25 سنة	أعزب\عزباء	6000-12000 جنيه مصري	مدينة	جامعة بكالوريوس /دبلوم	جامعة بكالوريوس /دبلوم	جامعة بكالوريوس /دبلوم	طالب	لا	لا	ليس لدي شريك	لا	نعم	الإنترنت, التلفاز, الأهل, الأصدقاء, الصحف - الكتب - المجلات	نعم	ربما	نعم	ربما	نعم	ربما	لا	ربما	لا	لا	ربما	لا	ربما	لا	ربما	لا	لا	ربما	نعم	نعم	نعم	ربما	ربما	ربما	لا	لا
أنثى	18-25 سنة	أعزب\عزباء	أقل من 6000 جنيه مصري	مدينة	ثانوي	جامعة بكالوريوس /دبلوم	جامعة بكالوريوس /دبلوم	طالب	لا	لا	لا	لا	نعم	الإنترنت	نعم	ربما	ربما	لا	نعم	لا	لا	ربما	لا	لا	لا	لا	نعم	لا	لا	لا	لا	ربما	نعم	نعم	نعم	نعم	لا	لا	لا	لا
أنثى	18-25 سنة	أعزب\عزباء	أقل من 6000 جنيه مصري	ريف	جامعة بكالوريوس /دبلوم	جامعة بكالوريوس /دبلوم	ابتدائي	طالب	نعم	نعم	ليس لدي شريك	لا	نعم	الإنترنت, التلفاز, المدرسة, الأهل, الأصدقاء	نعم	نعم	ربما	ربما	نعم	لا	لا	لا	لا	لا	ربما	نعم	ربما	ربما	ربما	ربما	لا	نعم	نعم	نعم	نعم	نعم	ربما	ربما	لا	لا
أنثى	18-25 سنة	أعزب\عزباء	أكثر من 12000 جنيه مصري	مدينة	جامعة بكالوريوس /دبلوم	جامعة بكالوريوس /دبلوم	ثانوي	طالب	نعم	لا	ليس لدي شريك	لا	نعم	الإنترنت, الأهل, الأصدقاء	نعم	نعم	لا	لا	نعم	لا	لا	لا	لا	لا	نعم	لا	ربما	لا	ربما	لا	لا	نعم	نعم	نعم	نعم	نعم	لا	لا	لا	لا
أنثى	18-25 سنة	أعزب\عزباء	أقل من 6000 جنيه مصري	مدينة	جامعة بكالوريوس /دبلوم	جامعة بكالوريوس /دبلوم	جامعة بكالوريوس /دبلوم	طالب	نعم	لا	لا	لا	نعم	المدرسة, الأصدقاء, الصحف - الكتب - المجلات	نعم	ربما	لا	ربما	نعم	لا	لا	لا	لا	لا	لا	لا	لا	لا	لا	لا	لا	ربما	نعم	نعم	نعم	نعم	نعم	نعم	لا	لا
أنثى	18-25 سنة	أعزب\عزباء	6000-12000 جنيه مصري	مدينة	جامعة بكالوريوس /دبلوم	جامعة بكالوريوس /دبلوم	جامعة بكالوريوس /دبلوم	طالب	لا	لا	ليس لدي شريك	لا	نعم	الإنترنت	نعم	لا	ربما	لا	نعم	لا	لا	لا	لا	لا	ربما	لا	لا	لا	ربما	لا	لا	نعم	نعم	نعم	نعم	نعم	نعم	نعم	لا	لا
أنثى	18-25 سنة	أعزب\عزباء	6000-12000 جنيه مصري	ريف	جامعة بكالوريوس /دبلوم	شهادات عليا	شهادات عليا	طالب	نعم	نعم	ليس لدي شريك	لا	نعم	الإنترنت, الأهل, الأصدقاء	نعم	نعم	لا	ربما	نعم	لا	لا	لا	لا	لا	لا	لا	نعم	لا	لا	لا	لا	ربما	نعم	نعم	نعم	نعم	لا	لا	لا	لا
ذكر	18-25 سنة	أعزب\عزباء	6000-12000 جنيه مصري	مدينة	جامعة بكالوريوس /دبلوم	جامعة بكالوريوس /دبلوم	جامعة بكالوريوس /دبلوم	طالب	لا	نعم	لا	نعم	نعم	الإنترنت, الأهل, الطبيب	نعم	نعم	ربما	ربما	ربما	لا	لا	لا	لا	لا	ربما	لا	ربما	ربما	لا	لا	لا	ربما	نعم	نعم	نعم	ربما	ربما	ربما	لا	لا
أنثى	18-25 سنة	أعزب\عزباء	6000-12000 جنيه مصري	ريف	جامعة بكالوريوس /دبلوم	جامعة بكالوريوس /دبلوم	جامعة بكالوريوس /دبلوم	طالب	لا	لا	ليس لدي شريك	لا	نعم	الإنترنت, التلفاز	نعم	لا	لا	لا	نعم	لا	لا	لا	لا	لا	نعم	لا	لا	لا	لا	لا	لا	نعم	نعم	نعم	نعم	نعم	لا	ربما	لا	لا
أنثى	18-25 سنة	أعزب\عزباء	أقل من 6000 جنيه مصري	مدينة	جامعة بكالوريوس /دبلوم	جامعة بكالوريوس /دبلوم	جامعة بكالوريوس /دبلوم	طالب	لا	لا	لا	لا	نعم	الإنترنت	نعم	نعم	نعم	نعم	نعم	ربما	ربما	ربما	ربما	ربما	نعم	لا	نعم	ربما	ربما	لا	لا	نعم	نعم	نعم	نعم	ربما	نعم	نعم	لا	ربما
أنثى	18-25 سنة	أعزب\عزباء	6000-12000 جنيه مصري	مدينة	جامعة بكالوريوس /دبلوم	جامعة بكالوريوس /دبلوم	جامعة بكالوريوس /دبلوم	عامل	لا	لا	لا	لا	نعم	الإنترنت, المدرسة, الأهل, الأصدقاء	نعم	نعم	لا	لا	نعم	لا	لا	لا	لا	لا	نعم	ربما	نعم	لا	ربما	ربما	لا	لا	نعم	نعم	نعم	نعم	نعم	لا	لا	لا
ذكر	18-25 سنة	أعزب\عزباء	أقل من 6000 جنيه مصري	مدينة	ثانوي	ثانوي	ثانوي	طالب	لا	لا	لا	لا	نعم	التلفاز	نعم	ربما	ربما	ربما	ربما	نعم	ربما	ربما	ربما	ربما	ربما	ربما	ربما	ربما	ربما	ربما	ربما	ربما	لا	لا	لا	لا	لا	لا	لا	لا
أنثى	18-25 سنة	أعزب\عزباء	أقل من 6000 جنيه مصري	مدينة	جامعة بكالوريوس /دبلوم	جامعة بكالوريوس /دبلوم	جامعة بكالوريوس /دبلوم	طالب	لا	لا	ليس لدي شريك	لا	نعم	الصحف - الكتب - المجلات	نعم	ربما	نعم	نعم	نعم	ربما	ربما	ربما	ربما	ربما	ربما	ربما	نعم	نعم	نعم	نعم	نعم	نعم	نعم	نعم	نعم	نعم	نعم	نعم	نعم	نعم
أنثى	18-25 سنة	أعزب\عزباء	أقل من 6000 جنيه مصري	مدينة	جامعة بكالوريوس /دبلوم	جامعة بكالوريوس /دبلوم	ثانوي	طالب	نعم	لا	ليس لدي شريك	لا	نعم	الإنترنت, التلفاز, المدرسة, الأهل, الأصدقاء, أخرى	نعم	لا	لا	لا	نعم	لا	لا	لا	لا	لا	ربما	لا	ربما	لا	لا	لا	لا	لا	نعم	نعم	نعم	نعم	نعم	ربما	لا	لا
أنثى	18-25 سنة	أعزب\عزباء	6000-12000 جنيه مصري	مدينة	شهادات عليا	جامعة بكالوريوس /دبلوم	جامعة بكالوريوس /دبلوم	عامل	نعم	لا	لا	لا	نعم	الإنترنت, الأهل, الصحف - الكتب - المجلات, الطبيب	نعم	لا	ربما	لا	ربما	لا	لا	لا	لا	لا	لا	لا	ربما	لا	لا	لا	لا	ربما	نعم	نعم	نعم	نعم	نعم	نعم	لا	لا
أنثى	18-25 سنة	متزوج/ة	أقل من 6000 جنيه مصري	مدينة	جامعة بكالوريوس /دبلوم	جامعة بكالوريوس /دبلوم	جامعة بكالوريوس /دبلوم	عامل	نعم	لا	لا	لا	نعم	الأهل	نعم	نعم	لا	ربما	نعم	لا	لا	لا	لا	لا	لا	لا	ربما	لا	نعم	لا	لا	ربما	نعم	نعم	نعم	نعم	نعم	نعم	لا	لا
ذكر	26-35 سنة	أعزب\عزباء	أقل من 6000 جنيه مصري	مدينة	جامعة بكالوريوس /دبلوم	جامعة بكالوريوس /دبلوم	جامعة بكالوريوس /دبلوم	متقاعد	نعم	نعم	ليس لدي شريك	لا	نعم	الطبيب	نعم	نعم	لا	لا	نعم	لا	لا	لا	لا	لا	لا	لا	نعم	لا	لا	لا	لا	لا	نعم	نعم	نعم	نعم	نعم	نعم	لا	لا
أنثى	18-25 سنة	أعزب\عزباء	أقل من 6000 جنيه مصري	ريف	جامعة بكالوريوس /دبلوم	ثانوي	جامعة بكالوريوس /دبلوم	عامل	نعم	لا	ليس لدي شريك	لا	نعم	الإنترنت	نعم	نعم	نعم	لا	نعم	لا	لا	لا	لا	لا	لا	لا	نعم	لا	لا	لا	لا	نعم	نعم	نعم	نعم	نعم	نعم	نعم	لا	لا
ذكر	26-35 سنة	أعزب\عزباء	أقل من 6000 جنيه مصري	ريف	جامعة بكالوريوس /دبلوم	ثانوي	جامعة بكالوريوس /دبلوم	عاطل عن العمل	نعم	لا	ليس لدي شريك	لا	نعم	الطبيب	نعم	نعم	نعم	لا	نعم	لا	لا	لا	لا	لا	لا	لا	نعم	لا	لا	لا	لا	لا	نعم	نعم	نعم	لا	لا	نعم	نعم	لا
ذكر	26-35 سنة	أعزب\عزباء	أقل من 6000 جنيه مصري	ريف	جامعة بكالوريوس /دبلوم	ثانوي	جامعة بكالوريوس /دبلوم	طالب	نعم	لا	ليس لدي شريك	لا	نعم	الإنترنت, المدرسة	نعم	نعم	نعم	ربما	نعم	لا	لا	لا	لا	لا	ربما	لا	لا	لا	ربما	لا	لا	ربما	نعم	نعم	نعم	نعم	نعم	نعم	لا	لا
ذكر	18-25 سنة	أعزب\عزباء	أكثر من 12000 جنيه مصري	مدينة	جامعة بكالوريوس /دبلوم	جامعة بكالوريوس /دبلوم	ثانوي	طالب	نعم	لا	ليس لدي شريك	لا	نعم	الإنترنت, التلفاز, المدرسة, الأهل, الأصدقاء, الصحف - الكتب - المجلات, أخرى	نعم	نعم	ربما	لا	لا	لا	لا	لا	لا	لا	ربما	لا	ربما	لا	لا	لا	لا	لا	نعم	نعم	نعم	نعم	ربما	ربما	ربما	لا
أنثى	26-35 سنة	أعزب\عزباء	أقل من 6000 جنيه مصري	مدينة	جامعة بكالوريوس /دبلوم	جامعة بكالوريوس /دبلوم	جامعة بكالوريوس /دبلوم	مربية منزل	نعم	لا	لا	لا	نعم	الإنترنت	نعم	نعم	نعم	لا	نعم	نعم	لا	نعم	لا	نعم	لا	لا	لا	نعم	نعم	نعم	لا	نعم	لا	لا	نعم	لا	لا	لا	لا	لا
ذكر	18-25 سنة	أعزب\عزباء	6000-12000 جنيه مصري	ريف	جامعة بكالوريوس /دبلوم	ثانوي	ثانوي	عامل	نعم	لا	لا	لا	نعم	الإنترنت, التلفاز, المدرسة, الأهل, الأصدقاء, الصحف - الكتب - المجلات, الطبيب	نعم	ربما	ربما	نعم	نعم	لا	لا	لا	لا	لا	ربما	لا	ربما	لا	ربما	لا	لا	لا	نعم	نعم	نعم	نعم	نعم	نعم	ربما	لا
أنثى	18-25 سنة	أعزب\عزباء	6000-12000 جنيه مصري	ريف	جامعة بكالوريوس /دبلوم	شهادات عليا	جامعة بكالوريوس /دبلوم	عامل	نعم	لا	ليس لدي شريك	لا	نعم	الإنترنت, الصحف - الكتب - المجلات	نعم	نعم	لا	لا	نعم	لا	لا	لا	لا	لا	لا	لا	نعم	لا	لا	لا	لا	لا	نعم	نعم	نعم	نعم	نعم	نعم	لا	لا
أنثى	18-25 سنة	أعزب\عزباء	6000-12000 جنيه مصري	مدينة	جامعة بكالوريوس /دبلوم	جامعة بكالوريوس /دبلوم	جامعة بكالوريوس /دبلوم	عاطل عن العمل	نعم	لا	ليس لدي شريك	لا	نعم	الإنترنت, التلفاز, أخرى	نعم	نعم	ربما	ربما	نعم	لا	لا	لا	لا	لا	لا	لا	لا	لا	لا	لا	لا	لا	نعم	نعم	نعم	نعم	لا	ربما	ربما	لا
ذكر	26-35 سنة	أعزب\عزباء	6000-12000 جنيه مصري	ريف	جامعة بكالوريوس /دبلوم	جامعة بكالوريوس /دبلوم	جامعة بكالوريوس /دبلوم	طالب	نعم	لا	ليس لدي شريك	لا	نعم	أخرى	نعم	نعم	لا	لا	نعم	لا	لا	لا	لا	ربما	لا	ربما	نعم	لا	لا	لا	لا	لا	نعم	نعم	نعم	نعم	ربما	ربما	لا	لا
أنثى	26-35 سنة	متزوج/ة	أقل من 6000 جنيه مصري	ريف	جامعة بكالوريوس /دبلوم	ثانوي	جامعة بكالوريوس /دبلوم	مربية منزل	نعم	لا	لا	لا	نعم	الإنترنت, التلفاز, الطبيب	نعم	ربما	لا	نعم	نعم	لا	لا	لا	لا	لا	ربما	لا	لا	لا	لا	لا	لا	ربما	نعم	نعم	نعم	نعم	ربما	ربما	لا	لا
أنثى	18-25 سنة	أعزب\عزباء	6000-12000 جنيه مصري	مدينة	جامعة بكالوريوس /دبلوم	شهادات عليا	جامعة بكالوريوس /دبلوم	عامل	نعم	لا	ليس لدي شريك	لا	نعم	الإنترنت, التلفاز, المدرسة, الأهل, الأصدقاء, الصحف - الكتب - المجلات, الطبيب	نعم	نعم	لا	نعم	نعم	لا	لا	لا	لا	لا	لا	لا	لا	لا	ربما	لا	لا	لا	نعم	نعم	نعم	نعم	نعم	نعم	لا	لا
ذكر	26-35 سنة	أعزب\عزباء	6000-12000 جنيه مصري	مدينة	جامعة بكالوريوس /دبلوم	جامعة بكالوريوس /دبلوم	ثانوي	مربية منزل	نعم	لا	ليس لدي شريك	لا	نعم	الطبيب	نعم	نعم	لا	نعم	نعم	لا	لا	لا	لا	لا	نعم	لا	لا	لا	لا	لا	لا	نعم	نعم	نعم	نعم	نعم	لا	نعم	ربما	لا
أنثى	18-25 سنة	أعزب\عزباء	أقل من 6000 جنيه مصري	ريف	جامعة بكالوريوس /دبلوم	ابتدائي	ثانوي	عاطل عن العمل	لا	لا	ليس لدي شريك	لا	نعم	الإنترنت	نعم	نعم	ربما	ربما	نعم	لا	لا	لا	لا	لا	لا	لا	نعم	لا	ربما	لا	لا	لا	نعم	نعم	نعم	نعم	ربما	ربما	لا	لا
أنثى	18-25 سنة	أعزب\عزباء	6000-12000 جنيه مصري	ريف	جامعة بكالوريوس /دبلوم	ثانوي	ثانوي	عامل	نعم	لا	لا	لا	نعم	المدرسة	نعم	لا	ربما	لا	نعم	لا	لا	لا	لا	لا	لا	لا	نعم	لا	ربما	لا	لا	لا	ربما	نعم	نعم	نعم	لا	ربما	ربما	ربما
أنثى	18-25 سنة	أعزب\عزباء	6000-12000 جنيه مصري	مدينة	جامعة بكالوريوس /دبلوم	جامعة بكالوريوس /دبلوم	جامعة بكالوريوس /دبلوم	طالب	نعم	لا	لا	لا	نعم	الأهل	نعم	نعم	ربما	لا	نعم	لا	لا	لا	لا	لا	نعم	لا	نعم	لا	لا	لا	لا	لا	نعم	نعم	نعم	نعم	نعم	نعم	لا	لا
ذكر	26-35 سنة	أعزب\عزباء	أكثر من 12000 جنيه مصري	مدينة	جامعة بكالوريوس /دبلوم	ابتدائي	ثانوي	مربية منزل	نعم	لا	لا	لا	نعم	أخرى	نعم	نعم	نعم	نعم	نعم	لا	لا	لا	لا	ربما	نعم	نعم	نعم	نعم	نعم	لا	لا	لا	نعم	نعم	نعم	نعم	نعم	ربما	لا	لا
أنثى	18-25 سنة	أعزب\عزباء	أقل من 6000 جنيه مصري	مدينة	جامعة بكالوريوس /دبلوم	ثانوي	جامعة بكالوريوس /دبلوم	طالب	نعم	لا	لا	لا	نعم	الإنترنت	نعم	نعم	ربما	نعم	نعم	لا	لا	لا	لا	لا	لا	لا	لا	لا	لا	لا	لا	نعم	نعم	نعم	نعم	نعم	نعم	نعم	لا	لا
أنثى	36-50 سنة	متزوج/ة	أقل من 6000 جنيه مصري	مدينة	جامعة بكالوريوس /دبلوم	ابتدائي	ثانوي	مربية منزل	لا	لا	لا	لا	نعم	الصحف - الكتب - المجلات	نعم	نعم	نعم	ربما	نعم	لا	لا	لا	لا	لا	لا	لا	نعم	لا	ربما	لا	لا	ربما	نعم	نعم	نعم	نعم	نعم	نعم	لا	لا
أنثى	18-25 سنة	أعزب\عزباء	6000-12000 جنيه مصري	ريف	جامعة بكالوريوس /دبلوم	ثانوي	جامعة بكالوريوس /دبلوم	طالب	نعم	لا	ليس لدي شريك	لا	نعم	الصحف - الكتب - المجلات	نعم	ربما	ربما	ربما	نعم	لا	لا	لا	لا	لا	ربما	لا	ربما	لا	ربما	لا	لا	لا	نعم	نعم	نعم	نعم	نعم	نعم	لا	لا
أنثى	18-25 سنة	أعزب\عزباء	6000-12000 جنيه مصري	مدينة	جامعة بكالوريوس /دبلوم	ثانوي	ثانوي	عامل	لا	لا	لا	لا	نعم	الإنترنت	نعم	ربما	لا	ربما	نعم	لا	لا	لا	لا	ربما	لا	لا	لا	لا	لا	لا	لا	لا	نعم	نعم	نعم	نعم	نعم	نعم	لا	لا
أنثى	18-25 سنة	أعزب\عزباء	6000-12000 جنيه مصري	ريف	جامعة بكالوريوس /دبلوم	ثانوي	ابتدائي	عامل	لا	لا	ليس لدي شريك	لا	نعم	الأصدقاء	نعم	ربما	لا	لا	نعم	لا	لا	لا	لا	لا	ربما	لا	لا	لا	ربما	لا	لا	نعم	نعم	نعم	نعم	نعم	ربما	ربما	لا	لا
أنثى	18-25 سنة	متزوج/ة	أقل من 6000 جنيه مصري	مدينة	جامعة بكالوريوس /دبلوم	جامعة بكالوريوس /دبلوم	ثانوي	مربية منزل	نعم	لا	لا	نعم	نعم	المدرسة, الطبيب, أخرى	نعم	نعم	ربما	ربما	نعم	نعم	نعم	نعم	لا	ربما	ربما	نعم	لا	لا	نعم	لا	ربما	لا	نعم	لا	نعم	لا	لا	ربما	نعم	ربما
أنثى	18-25 سنة	متزوج/ة	6000-12000 جنيه مصري	مدينة	جامعة بكالوريوس /دبلوم	جامعة بكالوريوس /دبلوم	جامعة بكالوريوس /دبلوم	عامل	لا	لا	لا	لا	لا	أخرى	نعم	لا	لا	لا	لا	لا	لا	لا	لا	لا	نعم	لا	نعم	لا	لا	لا	لا	لا	نعم	نعم	نعم	نعم	نعم	نعم	نعم	لا
أنثى	18-25 سنة	أعزب\عزباء	أكثر من 12000 جنيه مصري	ريف	شهادات عليا	ثانوي	ثانوي	عامل	لا	لا	لا	لا	نعم	الأصدقاء	نعم	نعم	لا	نعم	نعم	لا	ربما	لا	لا	لا	ربما	لا	نعم	لا	نعم	لا	لا	نعم	نعم	نعم	نعم	نعم	لا	لا	ربما	لا
أنثى	18-25 سنة	أعزب\عزباء	أقل من 6000 جنيه مصري	ريف	شهادات عليا	ابتدائي	ابتدائي	عاطل عن العمل	لا	لا	لا	لا	نعم	الأصدقاء	نعم	لا	نعم	لا	نعم	لا	لا	لا	لا	لا	لا	لا	نعم	لا	نعم	لا	لا	ربما	نعم	ربما	ربما	لا	لا	لا	نعم	نعم
ذكر	18-25 سنة	أعزب\عزباء	أقل من 6000 جنيه مصري	مدينة	جامعة بكالوريوس /دبلوم	ابتدائي	جامعة بكالوريوس /دبلوم	طالب	لا	لا	ليس لدي شريك	لا	نعم	الإنترنت	ربما	ربما	لا	لا	ربما	ربما	ربما	ربما	ربما	ربما	ربما	ربما	نعم	ربما	ربما	لا	ربما	ربما	لا	نعم	نعم	نعم	لا	ربما	نعم	ربما
ذكر	36-50 سنة	أعزب\عزباء	6000-12000 جنيه مصري	مدينة	جامعة بكالوريوس /دبلوم	ابتدائي	ابتدائي	عامل	لا	لا	ليس لدي شريك	لا	نعم	الأهل	نعم	ربما	ربما	لا	نعم	لا	لا	لا	لا	لا	لا	لا	نعم	لا	لا	لا	لا	لا	نعم	نعم	نعم	نعم	ربما	ربما	لا	لا
ذكر	51 سنة فأكثر	متزوج/ة	6000-12000 جنيه مصري	مدينة	ثانوي	ابتدائي	ابتدائي	عامل	لا	لا	لا	لا	نعم	أخرى	نعم	ربما	نعم	ربما	نعم	لا	لا	لا	لا	لا	نعم	لا	لا	ربما	لا	لا	لا	ربما	نعم	نعم	نعم	نعم	ربما	ربما	نعم	لا
أنثى	51 سنة فأكثر	أعزب\عزباء	6000-12000 جنيه مصري	مدينة	جامعة بكالوريوس /دبلوم	ابتدائي	ابتدائي	مربية منزل	لا	لا	لا	لا	نعم	الإنترنت	نعم	لا	ربما	لا	نعم	لا	لا	لا	لا	لا	لا	لا	نعم	لا	لا	لا	لا	ربما	نعم	نعم	نعم	نعم	لا	لا	لا	لا
أنثى	36-50 سنة	متزوج/ة	أكثر من 12000 جنيه مصري	ريف	جامعة بكالوريوس /دبلوم	شهادات عليا	ثانوي	عامل	لا	لا	لا	لا	نعم	الأهل	نعم	لا	لا	ربما	ربما	لا	لا	لا	لا	لا	لا	لا	لا	لا	لا	لا	لا	لا	نعم	نعم	نعم	نعم	ربما	نعم	لا	لا
أنثى	36-50 سنة	متزوج/ة	أقل من 6000 جنيه مصري	ريف	جامعة بكالوريوس /دبلوم	جامعة بكالوريوس /دبلوم	ابتدائي	عامل	لا	لا	لا	لا	نعم	الإنترنت, التلفاز, المدرسة, الصحف - الكتب - المجلات	نعم	ربما	نعم	نعم	نعم	لا	لا	لا	لا	لا	ربما	ربما	نعم	لا	ربما	لا	لا	لا	لا	ربما	ربما	لا	لا	لا	نعم	ربما
أنثى	51 سنة فأكثر	متزوج/ة	6000-12000 جنيه مصري	مدينة	شهادات عليا	جامعة بكالوريوس /دبلوم	ثانوي	عامل	لا	لا	لا	لا	نعم	المدرسة	نعم	نعم	لا	نعم	نعم	لا	لا	لا	لا	لا	نعم	لا	لا	لا	لا	لا	لا	نعم	نعم	نعم	نعم	نعم	نعم	نعم	لا	لا
أنثى	26-35 سنة	أعزب\عزباء	6000-12000 جنيه مصري	مدينة	جامعة بكالوريوس /دبلوم	جامعة بكالوريوس /دبلوم	ثانوي	طالب	نعم	لا	لا	لا	نعم	الطبيب	لا	لا	نعم	لا	نعم	لا	لا	لا	لا	لا	لا	لا	لا	لا	لا	لا	لا	نعم	نعم	نعم	نعم	نعم	نعم	نعم	لا	لا
أنثى	26-35 سنة	أعزب\عزباء	أقل من 6000 جنيه مصري	ريف	جامعة بكالوريوس /دبلوم	جامعة بكالوريوس /دبلوم	ثانوي	عاطل عن العمل	لا	لا	لا	لا	نعم	الإنترنت, التلفاز, المدرسة, الصحف - الكتب - المجلات	نعم	لا	نعم	لا	نعم	لا	لا	لا	لا	لا	لا	لا	لا	لا	لا	لا	لا	لا	نعم	نعم	نعم	نعم	نعم	نعم	لا	لا
أنثى	36-50 سنة	متزوج/ة	أقل من 6000 جنيه مصري	مدينة	جامعة بكالوريوس /دبلوم	جامعة بكالوريوس /دبلوم	ثانوي	عامل	لا	لا	لا	لا	نعم	الأهل	نعم	ربما	لا	ربما	نعم	ربما	ربما	لا	لا	لا	ربما	ربما	ربما	ربما	ربما	لا	لا	ربما	لا	نعم	نعم	نعم	لا	لا	لا	لا
أنثى	36-50 سنة	متزوج/ة	6000-12000 جنيه مصري	ريف	جامعة بكالوريوس /دبلوم	جامعة بكالوريوس /دبلوم	ابتدائي	عامل	لا	لا	لا	لا	نعم	التلفاز	نعم	لا	نعم	لا	نعم	ربما	لا	ربما	لا	لا	لا	لا	نعم	لا	نعم	لا	لا	ربما	نعم	نعم	نعم	ربما	ربما	لا	ربما	نعم
أنثى	51 سنة فأكثر	متزوج/ة	6000-12000 جنيه مصري	مدينة	جامعة بكالوريوس /دبلوم	ابتدائي	ابتدائي	مربية منزل	نعم	لا	لا	لا	نعم	الطبيب	نعم	لا	ربما	نعم	نعم	لا	لا	لا	لا	لا	لا	لا	لا	لا	لا	لا	لا	ربما	نعم	نعم	نعم	نعم	نعم	نعم	لا	لا
ذكر	36-50 سنة	متزوج/ة	6000-12000 جنيه مصري	مدينة	جامعة بكالوريوس /دبلوم	جامعة بكالوريوس /دبلوم	ابتدائي	مربية منزل	نعم	لا	لا	لا	نعم	الإنترنت, الصحف - الكتب - المجلات, الطبيب	نعم	لا	ربما	لا	نعم	لا	لا	لا	لا	لا	لا	لا	ربما	لا	لا	لا	لا	ربما	لا	نعم	نعم	نعم	نعم	لا	ربما	لا
أنثى	36-50 سنة	متزوج/ة	6000-12000 جنيه مصري	مدينة	جامعة بكالوريوس /دبلوم	ابتدائي	ثانوي	عامل	لا	نعم	لا	لا	نعم	الإنترنت, التلفاز, الأهل, الصحف - الكتب - المجلات	نعم	لا	ربما	ربما	ربما	لا	لا	لا	لا	لا	لا	لا	لا	لا	لا	لا	لا	ربما	نعم	نعم	نعم	نعم	ربما	ربما	ربما	لا
أنثى	18-25 سنة	أعزب\عزباء	6000-12000 جنيه مصري	مدينة	جامعة بكالوريوس /دبلوم	جامعة بكالوريوس /دبلوم	شهادات عليا	طالب	لا	لا	ليس لدي شريك	لا	نعم	الإنترنت, الأصدقاء, الصحف - الكتب - المجلات	نعم	ربما	لا	لا	نعم	لا	لا	لا	ربما	ربما	نعم	لا	نعم	لا	ربما	لا	لا	ربما	نعم	نعم	نعم	ربما	ربما	نعم	ربما	لا
أنثى	26-35 سنة	متزوج/ة	أقل من 6000 جنيه مصري	مدينة	ثانوي	ثانوي	ابتدائي	مربية منزل	لا	لا	لا	لا	نعم	الإنترنت	نعم	لا	نعم	لا	نعم	ربما	لا	لا	لا	لا	ربما	ربما	نعم	لا	لا	لا	لا	نعم	نعم	ربما	نعم	نعم	لا	لا	نعم	لا
أنثى	36-50 سنة	متزوج/ة	6000-12000 جنيه مصري	ريف	جامعة بكالوريوس /دبلوم	ثانوي	ابتدائي	عامل	لا	لا	لا	لا	نعم	الإنترنت, الصحف - الكتب - المجلات	نعم	نعم	نعم	ربما	نعم	لا	لا	لا	لا	لا	نعم	ربما	لا	ربما	ربما	لا	لا	لا	نعم	نعم	نعم	نعم	ربما	ربما	نعم	لا
أنثى	51 سنة فأكثر	أعزب\عزباء	أقل من 6000 جنيه مصري	مدينة	ثانوي	ابتدائي	ابتدائي	مربية منزل	لا	لا	لا	لا	نعم	الأهل	نعم	لا	لا	لا	نعم	لا	لا	لا	لا	لا	لا	لا	لا	لا	لا	لا	لا	ربما	لا	لا	لا	نعم	لا	ربما	ربما	ربما
أنثى	36-50 سنة	متزوج/ة	6000-12000 جنيه مصري	مدينة	شهادات عليا	جامعة بكالوريوس /دبلوم	ثانوي	عامل	نعم	لا	لا	لا	نعم	الصحف - الكتب - المجلات	نعم	نعم	لا	نعم	نعم	لا	لا	لا	لا	لا	لا	لا	ربما	لا	لا	لا	لا	نعم	نعم	نعم	نعم	نعم	نعم	نعم	لا	لا
أنثى	18-25 سنة	أعزب\عزباء	6000-12000 جنيه مصري	مدينة	جامعة بكالوريوس /دبلوم	جامعة بكالوريوس /دبلوم	ثانوي	عاطل عن العمل	لا	لا	ليس لدي شريك	لا	نعم	الإنترنت, أخرى	نعم	نعم	لا	نعم	نعم	لا	لا	لا	لا	لا	نعم	لا	نعم	لا	ربما	لا	ربما	ربما	نعم	نعم	نعم	نعم	نعم	نعم	نعم	لا
أنثى	36-50 سنة	متزوج/ة	أقل من 6000 جنيه مصري	ريف	جامعة بكالوريوس /دبلوم	ثانوي	ثانوي	مربية منزل	لا	لا	لا	لا	نعم	الأصدقاء	نعم	نعم	نعم	ربما	نعم	لا	لا	لا	لا	لا	نعم	لا	لا	لا	ربما	لا	لا	لا	نعم	نعم	نعم	نعم	نعم	نعم	لا	لا
أنثى	18-25 سنة	أعزب\عزباء	أكثر من 12000 جنيه مصري	مدينة	جامعة بكالوريوس /دبلوم	شهادات عليا	جامعة بكالوريوس /دبلوم	طالب	لا	لا	ليس لدي شريك	لا	نعم	الإنترنت	نعم	نعم	لا	ربما	نعم	ربما	لا	ربما	لا	نعم	نعم	لا	نعم	ربما	لا	ربما	لا	ربما	نعم	نعم	نعم	نعم	ربما	ربما	ربما	ربما
أنثى	18-25 سنة	أعزب\عزباء	6000-12000 جنيه مصري	مدينة	جامعة بكالوريوس /دبلوم	ابتدائي	ابتدائي	طالب	نعم	لا	ليس لدي شريك	لا	نعم	الطبيب	نعم	نعم	ربما	ربما	نعم	لا	لا	لا	لا	لا	نعم	لا	ربما	لا	ربما	لا	لا	لا	نعم	نعم	نعم	نعم	ربما	لا	ربما	لا
ذكر	51 سنة فأكثر	متزوج/ة	6000-12000 جنيه مصري	مدينة	جامعة بكالوريوس /دبلوم	ثانوي	ابتدائي	عامل	لا	لا	لا	لا	نعم	الأهل, الأصدقاء	نعم	لا	نعم	نعم	نعم	لا	لا	لا	لا	لا	لا	لا	لا	لا	نعم	لا	لا	ربما	نعم	نعم	نعم	نعم	نعم	نعم	لا	لا
أنثى	36-50 سنة	متزوج/ة	أقل من 6000 جنيه مصري	ريف	جامعة بكالوريوس /دبلوم	شهادات عليا	جامعة بكالوريوس /دبلوم	عامل	لا	لا	ليس لدي شريك	لا	نعم	أخرى	نعم	ربما	نعم	ربما	نعم	لا	لا	لا	لا	لا	ربما	لا	ربما	لا	ربما	لا	لا	نعم	ربما	ربما	ربما	ربما	لا	لا	ربما	ربما
أنثى	18-25 سنة	متزوج/ة	6000-12000 جنيه مصري	مدينة	جامعة بكالوريوس /دبلوم	جامعة بكالوريوس /دبلوم	ثانوي	عامل	نعم	لا	لا	لا	نعم	المدرسة	نعم	نعم	ربما	ربما	نعم	لا	لا	لا	لا	لا	ربما	لا	لا	لا	لا	لا	لا	ربما	نعم	نعم	نعم	نعم	لا	لا	لا	لا
ذكر	18-25 سنة	أعزب\عزباء	أقل من 6000 جنيه مصري	ريف	جامعة بكالوريوس /دبلوم	جامعة بكالوريوس /دبلوم	جامعة بكالوريوس /دبلوم	طالب	لا	لا	ليس لدي شريك	لا	نعم	أخرى	ربما	ربما	لا	لا	نعم	لا	لا	لا	ربما	لا	ربما	لا	ربما	ربما	ربما	ربما	لا	ربما	ربما	ربما	نعم	ربما	ربما	ربما	لا	لا
أنثى	36-50 سنة	متزوج/ة	6000-12000 جنيه مصري	ريف	جامعة بكالوريوس /دبلوم	جامعة بكالوريوس /دبلوم	جامعة بكالوريوس /دبلوم	عامل	لا	لا	لا	لا	نعم	الأصدقاء	نعم	نعم	ربما	ربما	نعم	لا	لا	لا	لا	لا	ربما	ربما	نعم	لا	ربما	لا	لا	ربما	نعم	نعم	نعم	ربما	لا	نعم	ربما	لا
أنثى	51 سنة فأكثر	متزوج/ة	أكثر من 12000 جنيه مصري	ريف	شهادات عليا	ابتدائي	ابتدائي	عامل	لا	لا	لا	لا	نعم	الصحف - الكتب - المجلات, أخرى	نعم	نعم	نعم	ربما	نعم	لا	لا	لا	لا	لا	لا	لا	لا	لا	ربما	لا	لا	ربما	نعم	نعم	نعم	نعم	ربما	نعم	لا	لا
أنثى	51 سنة فأكثر	متزوج/ة	أكثر من 12000 جنيه مصري	ريف	شهادات عليا	ابتدائي	ابتدائي	عامل	لا	لا	لا	لا	نعم	الصحف - الكتب - المجلات	نعم	نعم	نعم	ربما	نعم	لا	لا	لا	لا	لا	ربما	لا	لا	لا	ربما	لا	لا	ربما	نعم	نعم	نعم	نعم	ربما	نعم	لا	لا
أنثى	51 سنة فأكثر	متزوج/ة	6000-12000 جنيه مصري	مدينة	جامعة بكالوريوس /دبلوم	ثانوي	ثانوي	عامل	لا	لا	لا	لا	نعم	الإنترنت	نعم	نعم	نعم	نعم	نعم	لا	لا	لا	لا	لا	لا	لا	ربما	لا	لا	لا	لا	ربما	ربما	نعم	نعم	ربما	لا	ربما	نعم	ربما
أنثى	26-35 سنة	متزوج/ة	6000-12000 جنيه مصري	ريف	جامعة بكالوريوس /دبلوم	ابتدائي	ابتدائي	عامل	لا	لا	لا	لا	نعم	الإنترنت, التلفاز, الطبيب	ربما	لا	نعم	نعم	ربما	لا	لا	لا	لا	لا	ربما	لا	لا	لا	لا	لا	لا	ربما	لا	نعم	نعم	لا	لا	لا	ربما	لا
أنثى	36-50 سنة	متزوج/ة	6000-12000 جنيه مصري	ريف	جامعة بكالوريوس /دبلوم	جامعة بكالوريوس /دبلوم	جامعة بكالوريوس /دبلوم	مربية منزل	لا	لا	لا	لا	نعم	الأصدقاء	نعم	نعم	لا	نعم	نعم	لا	لا	لا	ربما	لا	ربما	ربما	نعم	لا	ربما	لا	لا	نعم	نعم	نعم	نعم	نعم	ربما	لا	ربما	لا
ذكر	51 سنة فأكثر	متزوج/ة	6000-12000 جنيه مصري	مدينة	شهادات عليا	ابتدائي	ابتدائي	عامل	لا	لا	لا	لا	نعم	الأصدقاء	ربما	ربما	لا	ربما	نعم	لا	لا	لا	لا	ربما	ربما	ربما	ربما	لا	لا	لا	لا	ربما	ربما	نعم	نعم	نعم	ربما	ربما	لا	لا
أنثى	18-25 سنة	أعزب\عزباء	أقل من 6000 جنيه مصري	مدينة	جامعة بكالوريوس /دبلوم	ثانوي	جامعة بكالوريوس /دبلوم	طالب	نعم	لا	ليس لدي شريك	لا	نعم	الإنترنت, الأهل	نعم	لا	ربما	لا	نعم	لا	لا	لا	لا	لا	لا	لا	ربما	لا	ربما	لا	لا	ربما	نعم	نعم	نعم	نعم	نعم	نعم	لا	لا
أنثى	18-25 سنة	أعزب\عزباء	6000-12000 جنيه مصري	مدينة	جامعة بكالوريوس /دبلوم	ثانوي	ثانوي	عاطل عن العمل	لا	لا	ليس لدي شريك	لا	نعم	الإنترنت, التلفاز, المدرسة, الأهل, الأصدقاء, الصحف - الكتب - المجلات	نعم	لا	ربما	نعم	نعم	لا	لا	لا	لا	لا	لا	لا	نعم	لا	ربما	لا	لا	لا	نعم	نعم	نعم	نعم	نعم	نعم	لا	لا
أنثى	36-50 سنة	متزوج/ة	6000-12000 جنيه مصري	مدينة	جامعة بكالوريوس /دبلوم	ابتدائي	ابتدائي	عامل	لا	لا	لا	لا	نعم	الأهل	نعم	ربما	ربما	ربما	نعم	لا	لا	لا	لا	لا	ربما	لا	لا	لا	لا	لا	لا	ربما	نعم	نعم	نعم	نعم	ربما	ربما	لا	لا
أنثى	36-50 سنة	متزوج/ة	6000-12000 جنيه مصري	ريف	جامعة بكالوريوس /دبلوم	جامعة بكالوريوس /دبلوم	جامعة بكالوريوس /دبلوم	عامل	لا	لا	لا	لا	نعم	الأصدقاء, الصحف - الكتب - المجلات	نعم	ربما	نعم	نعم	ربما	لا	لا	لا	لا	لا	لا	لا	لا	لا	لا	لا	لا	لا	نعم	نعم	نعم	نعم	ربما	ربما	لا	لا
أنثى	18-25 سنة	أعزب\عزباء	أقل من 6000 جنيه مصري	مدينة	جامعة بكالوريوس /دبلوم	جامعة بكالوريوس /دبلوم	جامعة بكالوريوس /دبلوم	عامل	نعم	لا	ليس لدي شريك	لا	نعم	الإنترنت, المدرسة, الأهل	نعم	نعم	لا	ربما	نعم	لا	لا	لا	لا	لا	لا	لا	نعم	لا	لا	لا	لا	ربما	نعم	نعم	نعم	نعم	نعم	نعم	لا	لا
أنثى	18-25 سنة	أعزب\عزباء	أكثر من 12000 جنيه مصري	مدينة	جامعة بكالوريوس /دبلوم	جامعة بكالوريوس /دبلوم	جامعة بكالوريوس /دبلوم	عامل	نعم	نعم	ليس لدي شريك	لا	نعم	الأهل	نعم	ربما	ربما	نعم	نعم	لا	لا	لا	لا	لا	نعم	لا	ربما	لا	لا	لا	لا	نعم	نعم	نعم	نعم	نعم	نعم	نعم	لا	لا
أنثى	18-25 سنة	أعزب\عزباء	6000-12000 جنيه مصري	مدينة	جامعة بكالوريوس /دبلوم	جامعة بكالوريوس /دبلوم	جامعة بكالوريوس /دبلوم	عامل	لا	لا	لا	لا	نعم	الإنترنت, التلفاز, المدرسة, الأهل, الأصدقاء, الصحف - الكتب - المجلات, أخرى	نعم	لا	لا	ربما	نعم	لا	لا	لا	لا	لا	لا	لا	ربما	لا	لا	لا	لا	ربما	نعم	نعم	نعم	نعم	نعم	نعم	لا	لا
أنثى	36-50 سنة	متزوج/ة	أكثر من 12000 جنيه مصري	مدينة	جامعة بكالوريوس /دبلوم	جامعة بكالوريوس /دبلوم	جامعة بكالوريوس /دبلوم	مربية منزل	نعم	لا	ليس لدي شريك	لا	نعم	الأهل	نعم	نعم	نعم	نعم	نعم	لا	لا	لا	لا	لا	ربما	ربما	ربما	ربما	ربما	لا	لا	نعم	نعم	نعم	نعم	نعم	ربما	ربما	ربما	لا
أنثى	26-35 سنة	متزوج/ة	6000-12000 جنيه مصري	ريف	جامعة بكالوريوس /دبلوم	جامعة بكالوريوس /دبلوم	جامعة بكالوريوس /دبلوم	عامل	لا	لا	لا	لا	نعم	الأهل, الأصدقاء, الصحف - الكتب - المجلات	نعم	لا	نعم	ربما	نعم	لا	لا	لا	لا	لا	لا	لا	ربما	لا	ربما	لا	لا	لا	نعم	نعم	نعم	نعم	لا	لا	نعم	لا
ذكر	36-50 سنة	متزوج/ة	6000-12000 جنيه مصري	مدينة	شهادات عليا	شهادات عليا	ثانوي	عامل	لا	نعم	لا	لا	نعم	الإنترنت, الأهل, الأصدقاء, الطبيب	نعم	نعم	نعم	نعم	نعم	لا	لا	لا	لا	ربما	ربما	ربما	ربما	لا	لا	لا	لا	نعم	نعم	نعم	نعم	نعم	نعم	نعم	ربما	لا
أنثى	18-25 سنة	متزوج/ة	6000-12000 جنيه مصري	مدينة	جامعة بكالوريوس /دبلوم	شهادات عليا	جامعة بكالوريوس /دبلوم	مربية منزل	لا	لا	لا	لا	نعم	الإنترنت, الأهل, الأصدقاء, الصحف - الكتب - المجلات	لا	لا	ربما	ربما	نعم	لا	لا	لا	لا	لا	لا	لا	ربما	لا	لا	لا	لا	ربما	نعم	نعم	نعم	نعم	نعم	نعم	لا	لا
أنثى	18-25 سنة	متزوج/ة	6000-12000 جنيه مصري	مدينة	جامعة بكالوريوس /دبلوم	ثانوي	ثانوي	مربية منزل	نعم	لا	لا	لا	نعم	أخرى	نعم	لا	ربما	لا	نعم	لا	لا	لا	لا	لا	نعم	لا	ربما	لا	لا	لا	لا	ربما	ربما	نعم	نعم	نعم	لا	نعم	لا	لا
ذكر	18-25 سنة	أعزب\عزباء	أقل من 6000 جنيه مصري	ريف	جامعة بكالوريوس /دبلوم	ثانوي	ثانوي	عاطل عن العمل	لا	لا	لا	لا	نعم	الإنترنت, التلفاز, المدرسة, الأهل, الأصدقاء, الطبيب, أخرى	ربما	لا	ربما	لا	نعم	ربما	لا	ربما	ربما	لا	نعم	ربما	ربما	ربما	ربما	لا	لا	ربما	نعم	نعم	نعم	ربما	ربما	ربما	ربما	ربما
ذكر	18-25 سنة	أعزب\عزباء	أكثر من 12000 جنيه مصري	مدينة	جامعة بكالوريوس /دبلوم	جامعة بكالوريوس /دبلوم	ثانوي	طالب	لا	لا	ليس لدي شريك	لا	نعم	الإنترنت, الأهل, الأصدقاء	نعم	نعم	لا	نعم	نعم	لا	لا	ربما	لا	نعم	لا	لا	ربما	لا	لا	لا	لا	نعم	نعم	نعم	نعم	نعم	نعم	نعم	لا	لا
ذكر	51 سنة فأكثر	متزوج/ة	أكثر من 12000 جنيه مصري	مدينة	شهادات عليا	ابتدائي	ابتدائي	متقاعد	لا	لا	لا	لا	نعم	الصحف - الكتب - المجلات	نعم	نعم	نعم	لا	نعم	لا	لا	لا	لا	ربما	لا	لا	ربما	لا	نعم	لا	لا	نعم	نعم	نعم	ربما	نعم	ربما	ربما	نعم	لا
أنثى	18-25 سنة	متزوج/ة	أقل من 6000 جنيه مصري	ريف	جامعة بكالوريوس /دبلوم	جامعة بكالوريوس /دبلوم	ثانوي	عامل	نعم	لا	لا	لا	نعم	الصحف - الكتب - المجلات	نعم	لا	ربما	لا	نعم	ربما	لا	لا	لا	لا	نعم	لا	نعم	لا	لا	لا	لا	لا	نعم	نعم	نعم	نعم	لا	لا	ربما	لا
أنثى	18-25 سنة	أعزب\عزباء	6000-12000 جنيه مصري	مدينة	جامعة بكالوريوس /دبلوم	جامعة بكالوريوس /دبلوم	ثانوي	طالب	لا	لا	ليس لدي شريك	لا	نعم	الصحف - الكتب - المجلات	لا	ربما	لا	لا	نعم	لا	لا	لا	لا	لا	ربما	لا	ربما	لا	ربما	لا	لا	لا	نعم	نعم	نعم	نعم	نعم	نعم	لا	لا
أنثى	36-50 سنة	متزوج/ة	6000-12000 جنيه مصري	مدينة	جامعة بكالوريوس /دبلوم	ابتدائي	ابتدائي	عامل	نعم	لا	لا	لا	نعم	الأهل	نعم	لا	ربما	نعم	ربما	لا	لا	لا	لا	لا	لا	لا	نعم	لا	لا	لا	لا	ربما	ربما	نعم	نعم	ربما	لا	لا	نعم	لا
أنثى	36-50 سنة	متزوج/ة	6000-12000 جنيه مصري	ريف	شهادات عليا	جامعة بكالوريوس /دبلوم	جامعة بكالوريوس /دبلوم	عامل	لا	لا	لا	لا	نعم	الأصدقاء	نعم	لا	لا	لا	نعم	لا	لا	لا	لا	لا	لا	لا	لا	لا	لا	لا	لا	نعم	نعم	نعم	نعم	نعم	نعم	نعم	لا	لا
أنثى	36-50 سنة	متزوج/ة	6000-12000 جنيه مصري	ريف	جامعة بكالوريوس /دبلوم	ابتدائي	ابتدائي	مربية منزل	لا	لا	لا	لا	نعم	الإنترنت	نعم	لا	ربما	ربما	نعم	لا	لا	لا	لا	لا	ربما	لا	ربما	لا	ربما	لا	لا	لا	نعم	نعم	نعم	نعم	نعم	ربما	ربما	لا
أنثى	36-50 سنة	متزوج/ة	أقل من 6000 جنيه مصري	ريف	جامعة بكالوريوس /دبلوم	ابتدائي	ابتدائي	مربية منزل	لا	لا	لا	لا	لا	الصحف - الكتب - المجلات	نعم	ربما	لا	ربما	نعم	لا	لا	لا	لا	ربما	ربما	لا	ربما	لا	ربما	لا	لا	لا	نعم	نعم	نعم	نعم	ربما	نعم	لا	لا
أنثى	26-35 سنة	متزوج/ة	أقل من 6000 جنيه مصري	ريف	جامعة بكالوريوس /دبلوم	ثانوي	ثانوي	عامل	نعم	لا	لا	لا	نعم	أخرى	نعم	لا	لا	ربما	نعم	لا	لا	لا	لا	لا	لا	لا	لا	لا	لا	لا	لا	لا	نعم	نعم	نعم	نعم	نعم	نعم	لا	لا
ذكر	36-50 سنة	متزوج/ة	أكثر من 12000 جنيه مصري	مدينة	جامعة بكالوريوس /دبلوم	جامعة بكالوريوس /دبلوم	ثانوي	عامل	لا	لا	لا	لا	نعم	الأهل, الأصدقاء, الصحف - الكتب - المجلات	نعم	ربما	ربما	ربما	نعم	لا	لا	لا	لا	لا	نعم	ربما	ربما	ربما	ربما	لا	لا	ربما	نعم	نعم	نعم	نعم	ربما	ربما	ربما	لا
أنثى	36-50 سنة	متزوج/ة	أقل من 6000 جنيه مصري	ريف	جامعة بكالوريوس /دبلوم	جامعة بكالوريوس /دبلوم	ثانوي	مربية منزل	نعم	لا	لا	لا	نعم	الأصدقاء	نعم	ربما	نعم	نعم	نعم	لا	لا	لا	لا	لا	ربما	لا	لا	لا	ربما	لا	لا	نعم	نعم	نعم	نعم	نعم	لا	لا	لا	لا
أنثى	36-50 سنة	متزوج/ة	6000-12000 جنيه مصري	ريف	شهادات عليا	ثانوي	ابتدائي	عامل	نعم	لا	لا	لا	لا	الإنترنت	ربما	ربما	نعم	ربما	نعم	ربما	لا	نعم	لا	نعم	ربما	ربما	ربما	ربما	ربما	لا	لا	نعم	ربما	نعم	نعم	نعم	لا	لا	نعم	لا
أنثى	51 سنة فأكثر	أعزب\عزباء	أقل من 6000 جنيه مصري	مدينة	جامعة بكالوريوس /دبلوم	ثانوي	ثانوي	عامل	لا	لا	ليس لدي شريك	لا	نعم	الإنترنت	نعم	ربما	لا	ربما	لا	لا	لا	لا	لا	ربما	ربما	لا	ربما	لا	ربما	لا	لا	لا	نعم	نعم	نعم	نعم	ربما	ربما	لا	لا
أنثى	18-25 سنة	أعزب\عزباء	6000-12000 جنيه مصري	مدينة	جامعة بكالوريوس /دبلوم	جامعة بكالوريوس /دبلوم	جامعة بكالوريوس /دبلوم	طالب	لا	لا	ليس لدي شريك	لا	نعم	المدرسة, الأصدقاء	نعم	لا	لا	نعم	نعم	لا	لا	لا	لا	لا	لا	لا	لا	لا	لا	لا	لا	لا	نعم	نعم	نعم	نعم	نعم	نعم	لا	لا
أنثى	51 سنة فأكثر	متزوج/ة	6000-12000 جنيه مصري	مدينة	شهادات عليا	ابتدائي	ابتدائي	عامل	نعم	لا	لا	لا	نعم	أخرى	نعم	نعم	ربما	نعم	نعم	لا	لا	نعم	لا	لا	لا	لا	لا	لا	لا	لا	لا	ربما	ربما	نعم	نعم	نعم	ربما	لا	ربما	لا
أنثى	36-50 سنة	متزوج/ة	6000-12000 جنيه مصري	ريف	جامعة بكالوريوس /دبلوم	ابتدائي	ابتدائي	مربية منزل	لا	لا	لا	لا	نعم	الإنترنت	ربما	ربما	ربما	ربما	نعم	لا	لا	لا	لا	لا	لا	لا	ربما	لا	لا	لا	لا	ربما	نعم	نعم	نعم	نعم	لا	لا	لا	لا
أنثى	18-25 سنة	أعزب\عزباء	أقل من 6000 جنيه مصري	مدينة	جامعة بكالوريوس /دبلوم	ابتدائي	جامعة بكالوريوس /دبلوم	عامل	لا	لا	ليس لدي شريك	لا	نعم	الإنترنت, التلفاز, الصحف - الكتب - المجلات	نعم	ربما	ربما	ربما	نعم	لا	لا	لا	لا	لا	ربما	ربما	لا	لا	ربما	لا	لا	ربما	نعم	نعم	نعم	نعم	ربما	نعم	لا	لا
أنثى	36-50 سنة	متزوج/ة	أقل من 6000 جنيه مصري	ريف	جامعة بكالوريوس /دبلوم	ابتدائي	ابتدائي	عامل	لا	لا	لا	لا	نعم	الإنترنت	لا	نعم	نعم	نعم	نعم	لا	لا	لا	لا	لا	ربما	لا	لا	لا	لا	ربما	لا	نعم	ربما	نعم	نعم	ربما	ربما	ربما	لا	لا
أنثى	26-35 سنة	متزوج/ة	6000-12000 جنيه مصري	ريف	جامعة بكالوريوس /دبلوم	جامعة بكالوريوس /دبلوم	جامعة بكالوريوس /دبلوم	عامل	لا	لا	لا	لا	نعم	الإنترنت, التلفاز, أخرى	نعم	ربما	نعم	ربما	نعم	لا	لا	لا	لا	لا	ربما	لا	ربما	لا	لا	لا	لا	ربما	نعم	نعم	نعم	نعم	ربما	ربما	لا	لا
أنثى	18-25 سنة	أعزب\عزباء	أقل من 6000 جنيه مصري	مدينة	جامعة بكالوريوس /دبلوم	ثانوي	ثانوي	متقاعد	لا	لا	لا	لا	نعم	الإنترنت, الصحف - الكتب - المجلات	نعم	ربما	لا	ربما	نعم	لا	لا	لا	لا	لا	ربما	ربما	نعم	لا	ربما	لا	لا	لا	نعم	نعم	نعم	نعم	ربما	ربما	لا	لا
أنثى	18-25 سنة	أعزب\عزباء	6000-12000 جنيه مصري	ريف	جامعة بكالوريوس /دبلوم	جامعة بكالوريوس /دبلوم	ثانوي	طالب	لا	لا	ليس لدي شريك	لا	نعم	الإنترنت	نعم	ربما	ربما	لا	نعم	لا	لا	لا	لا	لا	ربما	لا	ربما	لا	لا	لا	لا	ربما	نعم	نعم	نعم	نعم	نعم	نعم	نعم	لا
أنثى	18-25 سنة	أعزب\عزباء	6000-12000 جنيه مصري	مدينة	جامعة بكالوريوس /دبلوم	ثانوي	جامعة بكالوريوس /دبلوم	طالب	نعم	لا	ليس لدي شريك	لا	نعم	الإنترنت, التلفاز	نعم	لا	نعم	نعم	نعم	لا	لا	لا	لا	لا	نعم	لا	ربما	ربما	لا	لا	لا	نعم	نعم	نعم	نعم	نعم	ربما	لا	لا	لا
ذكر	18-25 سنة	أعزب\عزباء	أقل من 6000 جنيه مصري	ريف	جامعة بكالوريوس /دبلوم	جامعة بكالوريوس /دبلوم	ثانوي	طالب	لا	لا	ليس لدي شريك	لا	نعم	الإنترنت, المدرسة, الأصدقاء, الصحف - الكتب - المجلات	نعم	لا	لا	نعم	نعم	لا	ربما	ربما	لا	لا	لا	نعم	ربما	ربما	لا	لا	لا	نعم	نعم	نعم	نعم	نعم	ربما	ربما	نعم	ربما
أنثى	36-50 سنة	متزوج/ة	6000-12000 جنيه مصري	ريف	جامعة بكالوريوس /دبلوم	ثانوي	ثانوي	عامل	لا	لا	لا	لا	نعم	التلفاز	نعم	ربما	لا	ربما	نعم	لا	لا	لا	لا	لا	لا	لا	نعم	ربما	ربما	لا	لا	ربما	نعم	نعم	نعم	نعم	لا	لا	لا	لا
أنثى	18-25 سنة	أعزب\عزباء	6000-12000 جنيه مصري	مدينة	جامعة بكالوريوس /دبلوم	ابتدائي	ثانوي	طالب	لا	لا	ليس لدي شريك	لا	نعم	الإنترنت, التلفاز, أخرى	لا	لا	لا	ربما	نعم	لا	لا	لا	لا	لا	لا	لا	نعم	لا	لا	لا	لا	لا	نعم	نعم	نعم	نعم	نعم	نعم	لا	لا
أنثى	18-25 سنة	أعزب\عزباء	6000-12000 جنيه مصري	مدينة	جامعة بكالوريوس /دبلوم	جامعة بكالوريوس /دبلوم	جامعة بكالوريوس /دبلوم	طالب	لا	لا	ليس لدي شريك	لا	نعم	الإنترنت, الأصدقاء	نعم	ربما	لا	ربما	نعم	لا	لا	لا	لا	لا	ربما	ربما	ربما	ربما	ربما	ربما	لا	ربما	نعم	نعم	نعم	نعم	نعم	لا	لا	لا
ذكر	18-25 سنة	أعزب\عزباء	أقل من 6000 جنيه مصري	ريف	جامعة بكالوريوس /دبلوم	ثانوي	ثانوي	طالب	لا	لا	لا	لا	لا	أخرى	ربما	ربما	لا	ربما	ربما	نعم	ربما	ربما	ربما	نعم	ربما	ربما	ربما	ربما	لا	ربما	ربما	ربما	نعم	نعم	نعم	نعم	نعم	نعم	نعم	لا
أنثى	18-25 سنة	أعزب\عزباء	6000-12000 جنيه مصري	مدينة	جامعة بكالوريوس /دبلوم	ثانوي	ثانوي	طالب	لا	لا	لا	لا	نعم	المدرسة	نعم	ربما	لا	ربما	نعم	لا	لا	لا	لا	لا	ربما	لا	ربما	لا	لا	لا	لا	ربما	نعم	نعم	نعم	نعم	نعم	نعم	ربما	لا
أنثى	18-25 سنة	أعزب\عزباء	6000-12000 جنيه مصري	مدينة	جامعة بكالوريوس /دبلوم	جامعة بكالوريوس /دبلوم	جامعة بكالوريوس /دبلوم	طالب	نعم	لا	لا	لا	نعم	الصحف - الكتب - المجلات	نعم	ربما	ربما	ربما	نعم	لا	لا	لا	لا	لا	ربما	لا	لا	لا	لا	لا	لا	لا	نعم	نعم	نعم	نعم	نعم	نعم	لا	لا
أنثى	18-25 سنة	أعزب\عزباء	أقل من 6000 جنيه مصري	مدينة	جامعة بكالوريوس /دبلوم	ثانوي	ثانوي	عامل	لا	لا	لا	لا	لا	أخرى	ربما	ربما	ربما	ربما	ربما	ربما	ربما	ربما	ربما	ربما	ربما	ربما	ربما	ربما	ربما	ربما	ربما	ربما	ربما	ربما	ربما	ربما	ربما	ربما	ربما	ربما
أنثى	18-25 سنة	أعزب\عزباء	أقل من 6000 جنيه مصري	مدينة	جامعة بكالوريوس /دبلوم	ثانوي	ثانوي	طالب	لا	لا	ليس لدي شريك	لا	نعم	الإنترنت, المدرسة, الأصدقاء	ربما	ربما	لا	ربما	نعم	ربما	ربما	ربما	ربما	لا	ربما	ربما	ربما	لا	ربما	ربما	ربما	ربما	نعم	نعم	نعم	نعم	ربما	نعم	لا	لا
ذكر	18-25 سنة	أعزب\عزباء	6000-12000 جنيه مصري	ريف	جامعة بكالوريوس /دبلوم	ابتدائي	جامعة بكالوريوس /دبلوم	عاطل عن العمل	لا	لا	ليس لدي شريك	لا	نعم	الإنترنت	نعم	لا	لا	لا	نعم	ربما	لا	لا	لا	لا	لا	لا	ربما	لا	ربما	لا	لا	لا	نعم	ربما	نعم	نعم	نعم	ربما	لا	لا
أنثى	18-25 سنة	أعزب\عزباء	6000-12000 جنيه مصري	مدينة	جامعة بكالوريوس /دبلوم	ثانوي	ثانوي	عامل	لا	لا	لا	لا	لا	أخرى	ربما	لا	ربما	ربما	ربما	ربما	ربما	نعم	ربما	نعم	ربما	لا	لا	ربما	لا	ربما	لا	ربما	لا	لا	ربما	لا	ربما	ربما	نعم	ربما
أنثى	18-25 سنة	أعزب\عزباء	أقل من 6000 جنيه مصري	ريف	جامعة بكالوريوس /دبلوم	ابتدائي	ابتدائي	طالب	لا	لا	ليس لدي شريك	لا	نعم	الإنترنت	ربما	ربما	ربما	ربما	نعم	لا	لا	لا	لا	لا	ربما	لا	ربما	لا	ربما	لا	لا	ربما	نعم	نعم	نعم	نعم	ربما	ربما	لا	لا
أنثى	18-25 سنة	أعزب\عزباء	6000-12000 جنيه مصري	ريف	جامعة بكالوريوس /دبلوم	ثانوي	ثانوي	طالب	نعم	نعم	ليس لدي شريك	لا	نعم	الإنترنت, الأهل, الأصدقاء, الطبيب, أخرى	نعم	نعم	ربما	نعم	نعم	لا	لا	لا	لا	لا	لا	لا	نعم	لا	لا	لا	لا	ربما	نعم	نعم	نعم	نعم	نعم	نعم	لا	لا
أنثى	18-25 سنة	أعزب\عزباء	أقل من 6000 جنيه مصري	ريف	جامعة بكالوريوس /دبلوم	ابتدائي	ثانوي	عامل	لا	لا	ليس لدي شريك	لا	نعم	المدرسة, الأصدقاء, أخرى	نعم	لا	ربما	ربما	نعم	لا	لا	لا	لا	لا	لا	لا	نعم	لا	لا	لا	لا	ربما	نعم	نعم	نعم	نعم	ربما	نعم	لا	لا
ذكر	18-25 سنة	أعزب\عزباء	6000-12000 جنيه مصري	ريف	ثانوي	شهادات عليا	ثانوي	طالب	لا	لا	ليس لدي شريك	لا	لا	أخرى	ربما	ربما	ربما	ربما	ربما	ربما	ربما	ربما	ربما	ربما	ربما	ربما	ربما	ربما	ربما	ربما	ربما	ربما	ربما	ربما	ربما	ربما	ربما	ربما	ربما	ربما
ذكر	18-25 سنة	أعزب\عزباء	أقل من 6000 جنيه مصري	ريف	جامعة بكالوريوس /دبلوم	جامعة بكالوريوس /دبلوم	ثانوي	طالب	لا	لا	ليس لدي شريك	لا	نعم	الإنترنت	ربما	ربما	ربما	ربما	ربما	ربما	ربما	ربما	ربما	ربما	ربما	ربما	ربما	ربما	ربما	لا	ربما	ربما	نعم	نعم	نعم	نعم	نعم	نعم	نعم	لا
أنثى	18-25 سنة	أعزب\عزباء	أكثر من 12000 جنيه مصري	مدينة	جامعة بكالوريوس /دبلوم	ثانوي	جامعة بكالوريوس /دبلوم	طالب	لا	لا	ليس لدي شريك	لا	نعم	الإنترنت, الأهل	ربما	لا	لا	نعم	نعم	لا	لا	لا	لا	لا	ربما	ربما	لا	ربما	ربما	لا	ربما	نعم	نعم	ربما	نعم	ربما	نعم	ربما	لا	لا
أنثى	18-25 سنة	أعزب\عزباء	6000-12000 جنيه مصري	مدينة	جامعة بكالوريوس /دبلوم	جامعة بكالوريوس /دبلوم	جامعة بكالوريوس /دبلوم	طالب	لا	لا	لا	لا	نعم	الإنترنت	نعم	ربما	نعم	نعم	نعم	لا	لا	ربما	لا	لا	ربما	لا	ربما	لا	لا	لا	لا	ربما	ربما	ربما	نعم	ربما	لا	ربما	ربما	لا
ذكر	18-25 سنة	أعزب\عزباء	أقل من 6000 جنيه مصري	ريف	جامعة بكالوريوس /دبلوم	ثانوي	جامعة بكالوريوس /دبلوم	طالب	لا	لا	لا	لا	نعم	الأصدقاء	نعم	لا	نعم	نعم	نعم	لا	لا	لا	لا	لا	نعم	لا	نعم	لا	لا	نعم	لا	لا	نعم	نعم	نعم	نعم	لا	لا	نعم	نعم
ذكر	18-25 سنة	أعزب\عزباء	أقل من 6000 جنيه مصري	مدينة	ثانوي	شهادات عليا	جامعة بكالوريوس /دبلوم	عامل	لا	لا	ليس لدي شريك	لا	لا	الإنترنت	نعم	ربما	لا	ربما	نعم	لا	لا	لا	ربما	نعم	ربما	لا	ربما	ربما	ربما	نعم	لا	ربما	نعم	نعم	نعم	نعم	ربما	ربما	لا	لا
ذكر	18-25 سنة	أعزب\عزباء	أقل من 6000 جنيه مصري	مدينة	جامعة بكالوريوس /دبلوم	جامعة بكالوريوس /دبلوم	جامعة بكالوريوس /دبلوم	طالب	لا	لا	لا	لا	لا	أخرى	ربما	ربما	ربما	ربما	ربما	ربما	ربما	ربما	لا	ربما	ربما	ربما	ربما	ربما	ربما	لا	ربما	ربما	ربما	نعم	نعم	نعم	نعم	نعم	ربما	لا
ذكر	18-25 سنة	أعزب\عزباء	6000-12000 جنيه مصري	مدينة	ثانوي	شهادات عليا	جامعة بكالوريوس /دبلوم	طالب	لا	لا	ليس لدي شريك	لا	نعم	المدرسة	ربما	ربما	ربما	ربما	لا	لا	لا	لا	لا	لا	ربما	لا	ربما	لا	ربما	لا	لا	ربما	نعم	نعم	نعم	ربما	ربما	ربما	لا	لا
أنثى	18-25 سنة	أعزب\عزباء	6000-12000 جنيه مصري	ريف	جامعة بكالوريوس /دبلوم	جامعة بكالوريوس /دبلوم	جامعة بكالوريوس /دبلوم	عامل	لا	لا	ليس لدي شريك	لا	نعم	الإنترنت	نعم	لا	ربما	نعم	نعم	لا	لا	ربما	لا	نعم	ربما	لا	نعم	لا	ربما	لا	ربما	لا	نعم	نعم	نعم	نعم	ربما	ربما	لا	لا
أنثى	18-25 سنة	أعزب\عزباء	6000-12000 جنيه مصري	مدينة	جامعة بكالوريوس /دبلوم	ابتدائي	ثانوي	طالب	لا	لا	لا	لا	نعم	الإنترنت, المدرسة, الأهل, الأصدقاء	نعم	لا	ربما	لا	نعم	لا	لا	لا	لا	لا	لا	لا	ربما	لا	لا	لا	لا	لا	نعم	نعم	نعم	نعم	ربما	نعم	لا	لا
أنثى	18-25 سنة	أعزب\عزباء	أقل من 6000 جنيه مصري	مدينة	جامعة بكالوريوس /دبلوم	ثانوي	ثانوي	طالب	لا	لا	لا	لا	نعم	الأهل	نعم	ربما	لا	ربما	ربما	لا	لا	لا	لا	لا	ربما	لا	لا	لا	لا	لا	لا	ربما	نعم	نعم	نعم	نعم	نعم	لا	لا	لا
أنثى	18-25 سنة	متزوج/ة	6000-12000 جنيه مصري	ريف	جامعة بكالوريوس /دبلوم	ابتدائي	ثانوي	طالب	لا	لا	لا	لا	نعم	الإنترنت, التلفاز, الأصدقاء, أخرى	ربما	نعم	ربما	لا	نعم	لا	لا	لا	لا	لا	نعم	لا	نعم	لا	ربما	لا	لا	ربما	نعم	نعم	نعم	نعم	ربما	ربما	لا	لا
أنثى	18-25 سنة	أعزب\عزباء	6000-12000 جنيه مصري	مدينة	جامعة بكالوريوس /دبلوم	جامعة بكالوريوس /دبلوم	جامعة بكالوريوس /دبلوم	طالب	نعم	لا	ليس لدي شريك	لا	نعم	الإنترنت, الصحف - الكتب - المجلات, أخرى	ربما	ربما	ربما	لا	نعم	لا	لا	لا	لا	لا	ربما	لا	ربما	لا	ربما	لا	ربما	لا	نعم	نعم	نعم	نعم	لا	ربما	ربما	لا
أنثى	18-25 سنة	أعزب\عزباء	أكثر من 12000 جنيه مصري	مدينة	جامعة بكالوريوس /دبلوم	شهادات عليا	جامعة بكالوريوس /دبلوم	طالب	نعم	لا	ليس لدي شريك	لا	نعم	الإنترنت, المدرسة, الأهل, الأصدقاء, الصحف - الكتب - المجلات	نعم	نعم	ربما	نعم	نعم	لا	لا	لا	لا	لا	لا	لا	نعم	لا	ربما	لا	لا	لا	نعم	نعم	نعم	نعم	ربما	ربما	لا	لا
أنثى	18-25 سنة	أعزب\عزباء	6000-12000 جنيه مصري	ريف	جامعة بكالوريوس /دبلوم	ثانوي	ثانوي	طالب	نعم	لا	ليس لدي شريك	لا	نعم	الإنترنت, التلفاز, المدرسة, الصحف - الكتب - المجلات, أخرى	نعم	نعم	لا	لا	نعم	لا	لا	لا	لا	لا	ربما	لا	لا	لا	لا	لا	لا	نعم	نعم	نعم	نعم	نعم	نعم	نعم	لا	لا
أنثى	18-25 سنة	أعزب\عزباء	أكثر من 12000 جنيه مصري	مدينة	جامعة بكالوريوس /دبلوم	جامعة بكالوريوس /دبلوم	جامعة بكالوريوس /دبلوم	طالب	لا	لا	ليس لدي شريك	لا	نعم	الإنترنت, التلفاز	نعم	ربما	ربما	ربما	نعم	لا	لا	ربما	لا	لا	ربما	لا	نعم	لا	ربما	ربما	لا	ربما	نعم	لا	ربما	لا	لا	لا	ربما	ربما
ذكر	18-25 سنة	أعزب\عزباء	6000-12000 جنيه مصري	مدينة	ثانوي	جامعة بكالوريوس /دبلوم	جامعة بكالوريوس /دبلوم	طالب	لا	لا	ليس لدي شريك	لا	نعم	الأصدقاء	نعم	ربما	لا	لا	ربما	لا	لا	لا	لا	لا	لا	لا	ربما	لا	لا	لا	لا	نعم	نعم	نعم	نعم	نعم	نعم	نعم	لا	لا
أنثى	18-25 سنة	أعزب\عزباء	أكثر من 12000 جنيه مصري	ريف	جامعة بكالوريوس /دبلوم	جامعة بكالوريوس /دبلوم	جامعة بكالوريوس /دبلوم	عامل	لا	لا	ليس لدي شريك	لا	نعم	الإنترنت, الأهل, الأصدقاء, الصحف - الكتب - المجلات	نعم	لا	ربما	نعم	نعم	لا	لا	لا	لا	لا	لا	لا	ربما	لا	لا	لا	لا	ربما	نعم	نعم	نعم	نعم	نعم	نعم	لا	لا
ذكر	18-25 سنة	أعزب\عزباء	أقل من 6000 جنيه مصري	مدينة	جامعة بكالوريوس /دبلوم	ابتدائي	جامعة بكالوريوس /دبلوم	عاطل عن العمل	لا	لا	ليس لدي شريك	لا	نعم	المدرسة, الأصدقاء	نعم	نعم	ربما	لا	نعم	نعم	لا	ربما	لا	ربما	ربما	ربما	نعم	لا	لا	لا	لا	لا	ربما	نعم	نعم	نعم	نعم	نعم	ربما	لا
أنثى	18-25 سنة	أعزب\عزباء	أقل من 6000 جنيه مصري	مدينة	جامعة بكالوريوس /دبلوم	جامعة بكالوريوس /دبلوم	ثانوي	طالب	لا	لا	ليس لدي شريك	لا	نعم	المدرسة, الأهل, الأصدقاء	نعم	ربما	نعم	ربما	نعم	ربما	لا	لا	لا	لا	ربما	لا	نعم	ربما	ربما	لا	لا	لا	نعم	نعم	نعم	نعم	ربما	ربما	ربما	ربما
أنثى	18-25 سنة	أعزب\عزباء	أكثر من 12000 جنيه مصري	مدينة	جامعة بكالوريوس /دبلوم	ابتدائي	ابتدائي	طالب	نعم	لا	ليس لدي شريك	لا	نعم	الإنترنت	نعم	ربما	لا	لا	نعم	لا	لا	لا	لا	لا	ربما	ربما	لا	لا	ربما	لا	لا	ربما	نعم	نعم	نعم	نعم	لا	لا	لا	لا
أنثى	26-35 سنة	متزوج/ة	6000-12000 جنيه مصري	مدينة	جامعة بكالوريوس /دبلوم	جامعة بكالوريوس /دبلوم	ثانوي	مربية منزل	لا	لا	لا	لا	نعم	أخرى	نعم	لا	لا	لا	نعم	لا	لا	لا	لا	لا	لا	لا	نعم	لا	لا	لا	لا	ربما	نعم	نعم	نعم	نعم	ربما	ربما	لا	لا
أنثى	36-50 سنة	متزوج/ة	6000-12000 جنيه مصري	مدينة	ثانوي	جامعة بكالوريوس /دبلوم	ثانوي	عاطل عن العمل	لا	لا	لا	لا	نعم	الأصدقاء	نعم	لا	ربما	ربما	ربما	لا	لا	لا	لا	لا	ربما	لا	لا	لا	ربما	لا	لا	نعم	ربما	نعم	نعم	نعم	لا	لا	لا	لا
أنثى	36-50 سنة	متزوج/ة	أكثر من 12000 جنيه مصري	مدينة	ابتدائي	ابتدائي	ابتدائي	مربية منزل	لا	لا	لا	لا	لا	الأصدقاء	نعم	لا	لا	ربما	نعم	لا	لا	لا	لا	لا	لا	لا	نعم	لا	ربما	لا	لا	لا	نعم	نعم	نعم	نعم	ربما	نعم	لا	لا
أنثى	18-25 سنة	متزوج/ة	أقل من 6000 جنيه مصري	مدينة	جامعة بكالوريوس /دبلوم	جامعة بكالوريوس /دبلوم	ثانوي	طالب	لا	لا	لا	لا	نعم	الإنترنت, المدرسة, الأهل, الأصدقاء, الصحف - الكتب - المجلات, الطبيب	نعم	لا	لا	نعم	نعم	لا	لا	نعم	ربما	نعم	ربما	لا	لا	ربما	لا	لا	لا	ربما	نعم	نعم	نعم	نعم	نعم	لا	ربما	لا
أنثى	18-25 سنة	أعزب\عزباء	6000-12000 جنيه مصري	ريف	جامعة بكالوريوس /دبلوم	ثانوي	جامعة بكالوريوس /دبلوم	طالب	نعم	لا	ليس لدي شريك	لا	نعم	الصحف - الكتب - المجلات	نعم	نعم	لا	ربما	ربما	لا	لا	ربما	لا	لا	ربما	لا	ربما	لا	ربما	لا	لا	لا	نعم	نعم	نعم	نعم	ربما	ربما	لا	لا
أنثى	36-50 سنة	متزوج/ة	6000-12000 جنيه مصري	ريف	جامعة بكالوريوس /دبلوم	ثانوي	جامعة بكالوريوس /دبلوم	عامل	نعم	لا	لا	لا	نعم	الصحف - الكتب - المجلات	نعم	ربما	ربما	نعم	نعم	لا	لا	لا	لا	لا	ربما	لا	نعم	لا	لا	لا	لا	لا	نعم	نعم	نعم	نعم	ربما	ربما	ربما	لا
أنثى	36-50 سنة	أعزب\عزباء	أقل من 6000 جنيه مصري	ريف	جامعة بكالوريوس /دبلوم	ابتدائي	ابتدائي	عامل	نعم	لا	ليس لدي شريك	لا	نعم	أخرى	نعم	لا	لا	ربما	نعم	لا	لا	لا	لا	لا	لا	لا	نعم	لا	لا	لا	لا	نعم	نعم	نعم	نعم	نعم	نعم	نعم	لا	لا
أنثى	36-50 سنة	متزوج/ة	6000-12000 جنيه مصري	مدينة	جامعة بكالوريوس /دبلوم	جامعة بكالوريوس /دبلوم	ثانوي	عامل	لا	لا	لا	لا	نعم	الإنترنت	نعم	لا	ربما	لا	ربما	لا	لا	لا	لا	لا	ربما	لا	نعم	لا	ربما	لا	لا	ربما	نعم	نعم	نعم	نعم	ربما	لا	لا	لا
أنثى	18-25 سنة	أعزب\عزباء	أقل من 6000 جنيه مصري	مدينة	جامعة بكالوريوس /دبلوم	شهادات عليا	جامعة بكالوريوس /دبلوم	متقاعد	لا	لا	ليس لدي شريك	لا	نعم	الإنترنت, الأهل	نعم	نعم	ربما	ربما	نعم	ربما	لا	ربما	ربما	ربما	لا	ربما	نعم	ربما	ربما	لا	لا	نعم	نعم	نعم	نعم	لا	لا	لا	نعم	لا
ذكر	51 سنة فأكثر	متزوج/ة	6000-12000 جنيه مصري	مدينة	جامعة بكالوريوس /دبلوم	ابتدائي	ابتدائي	عاطل عن العمل	لا	لا	لا	لا	نعم	الإنترنت	نعم	لا	ربما	ربما	نعم	لا	لا	لا	لا	لا	لا	لا	ربما	لا	لا	لا	لا	ربما	نعم	نعم	نعم	نعم	نعم	نعم	لا	لا
أنثى	18-25 سنة	أعزب\عزباء	أقل من 6000 جنيه مصري	ريف	ثانوي	ثانوي	ثانوي	طالب	لا	لا	ليس لدي شريك	لا	نعم	التلفاز	نعم	نعم	لا	لا	لا	لا	لا	لا	لا	ربما	لا	لا	نعم	لا	لا	لا	لا	لا	نعم	نعم	نعم	نعم	ربما	ربما	لا	لا
أنثى	26-35 سنة	متزوج/ة	أقل من 6000 جنيه مصري	مدينة	جامعة بكالوريوس /دبلوم	ابتدائي	جامعة بكالوريوس /دبلوم	عامل	نعم	لا	لا	لا	نعم	الإنترنت, التلفاز, الصحف - الكتب - المجلات, أخرى	نعم	نعم	لا	نعم	ربما	لا	لا	ربما	لا	لا	ربما	لا	لا	لا	ربما	لا	لا	نعم	نعم	نعم	نعم	نعم	ربما	ربما	ربما	لا
أنثى	26-35 سنة	متزوج/ة	أقل من 6000 جنيه مصري	مدينة	جامعة بكالوريوس /دبلوم	جامعة بكالوريوس /دبلوم	ثانوي	مربية منزل	لا	نعم	لا	لا	نعم	الأهل	نعم	ربما	ربما	نعم	نعم	لا	لا	لا	لا	لا	لا	لا	لا	لا	لا	ربما	لا	ربما	نعم	نعم	نعم	نعم	لا	لا	لا	لا
أنثى	36-50 سنة	أعزب\عزباء	أقل من 6000 جنيه مصري	مدينة	شهادات عليا	ثانوي	ثانوي	عامل	نعم	لا	ليس لدي شريك	لا	نعم	الإنترنت	نعم	نعم	نعم	ربما	نعم	لا	لا	لا	لا	لا	ربما	لا	ربما	لا	لا	لا	لا	لا	نعم	نعم	نعم	نعم	ربما	نعم	لا	لا
أنثى	18-25 سنة	متزوج/ة	أقل من 6000 جنيه مصري	مدينة	ثانوي	ثانوي	ثانوي	مربية منزل	لا	لا	لا	لا	نعم	الإنترنت	نعم	لا	لا	لا	ربما	لا	لا	لا	لا	لا	لا	لا	نعم	لا	لا	لا	لا	نعم	نعم	نعم	نعم	نعم	نعم	نعم	لا	لا
أنثى	26-35 سنة	متزوج/ة	أقل من 6000 جنيه مصري	مدينة	ثانوي	ثانوي	ثانوي	مربية منزل	لا	لا	لا	لا	نعم	الأصدقاء	نعم	ربما	ربما	ربما	نعم	لا	لا	لا	لا	لا	لا	لا	لا	لا	ربما	لا	لا	ربما	نعم	نعم	نعم	نعم	لا	لا	نعم	لا
ذكر	18-25 سنة	أعزب\عزباء	أقل من 6000 جنيه مصري	مدينة	ثانوي	ثانوي	ثانوي	طالب	لا	لا	ليس لدي شريك	لا	لا	أخرى	ربما	ربما	ربما	ربما	نعم	ربما	ربما	ربما	ربما	ربما	ربما	ربما	ربما	ربما	ربما	ربما	ربما	ربما	ربما	نعم	نعم	نعم	ربما	ربما	ربما	لا
أنثى	18-25 سنة	أعزب\عزباء	6000-12000 جنيه مصري	مدينة	ثانوي	ثانوي	ثانوي	طالب	لا	لا	ليس لدي شريك	لا	نعم	الإنترنت, الأهل, الأصدقاء, أخرى	ربما	لا	لا	لا	ربما	لا	لا	لا	لا	لا	لا	لا	ربما	لا	لا	لا	لا	ربما	نعم	نعم	نعم	نعم	لا	لا	لا	ربما
ذكر	18-25 سنة	أعزب\عزباء	أكثر من 12000 جنيه مصري	مدينة	جامعة بكالوريوس /دبلوم	جامعة بكالوريوس /دبلوم	جامعة بكالوريوس /دبلوم	عامل	لا	لا	لا	لا	نعم	الصحف - الكتب - المجلات, الطبيب	نعم	لا	لا	نعم	لا	ربما	لا	ربما	لا	لا	ربما	لا	لا	لا	لا	ربما	لا	ربما	نعم	نعم	نعم	لا	لا	لا	لا	لا
أنثى	36-50 سنة	متزوج/ة	أقل من 6000 جنيه مصري	مدينة	جامعة بكالوريوس /دبلوم	ابتدائي	ابتدائي	مربية منزل	لا	لا	لا	لا	نعم	الإنترنت	نعم	نعم	ربما	ربما	نعم	لا	لا	لا	لا	لا	لا	لا	نعم	لا	نعم	لا	لا	ربما	ربما	نعم	نعم	نعم	ربما	ربما	ربما	لا
أنثى	26-35 سنة	متزوج/ة	أقل من 6000 جنيه مصري	مدينة	ثانوي	ابتدائي	ابتدائي	مربية منزل	لا	لا	لا	لا	نعم	الإنترنت, التلفاز, المدرسة, الأهل, الأصدقاء	نعم	لا	لا	لا	لا	لا	لا	لا	لا	لا	لا	لا	لا	لا	لا	لا	لا	لا	نعم	نعم	نعم	نعم	نعم	نعم	لا	لا
أنثى	18-25 سنة	أعزب\عزباء	أقل من 6000 جنيه مصري	مدينة	جامعة بكالوريوس /دبلوم	ثانوي	جامعة بكالوريوس /دبلوم	عاطل عن العمل	نعم	لا	ليس لدي شريك	لا	نعم	الإنترنت, المدرسة, أخرى	نعم	نعم	لا	لا	نعم	لا	لا	لا	لا	لا	لا	لا	نعم	لا	لا	لا	لا	لا	نعم	نعم	نعم	نعم	نعم	نعم	لا	لا
ذكر	26-35 سنة	متزوج/ة	أقل من 6000 جنيه مصري	مدينة	جامعة بكالوريوس /دبلوم	ثانوي	ثانوي	عامل	نعم	لا	لا	لا	نعم	الإنترنت, الأهل, الصحف - الكتب - المجلات	نعم	ربما	لا	لا	نعم	نعم	ربما	ربما	لا	لا	لا	لا	نعم	لا	لا	لا	لا	لا	نعم	نعم	نعم	نعم	نعم	لا	لا	لا
أنثى	26-35 سنة	متزوج/ة	أقل من 6000 جنيه مصري	مدينة	جامعة بكالوريوس /دبلوم	ثانوي	جامعة بكالوريوس /دبلوم	عاطل عن العمل	لا	لا	لا	لا	نعم	الصحف - الكتب - المجلات	نعم	نعم	ربما	ربما	نعم	لا	لا	لا	لا	لا	لا	لا	نعم	لا	لا	لا	لا	لا	نعم	نعم	نعم	نعم	ربما	ربما	لا	لا
أنثى	36-50 سنة	متزوج/ة	6000-12000 جنيه مصري	مدينة	جامعة بكالوريوس /دبلوم	ثانوي	جامعة بكالوريوس /دبلوم	عامل	لا	لا	لا	لا	نعم	الإنترنت, التلفاز	نعم	ربما	نعم	ربما	نعم	لا	لا	لا	لا	لا	نعم	ربما	ربما	لا	ربما	لا	لا	لا	نعم	نعم	نعم	نعم	لا	لا	لا	لا
أنثى	18-25 سنة	أعزب\عزباء	أقل من 6000 جنيه مصري	مدينة	جامعة بكالوريوس /دبلوم	ابتدائي	ثانوي	طالب	نعم	لا	لا	لا	نعم	الإنترنت, التلفاز	نعم	ربما	لا	نعم	نعم	لا	لا	لا	لا	لا	نعم	لا	ربما	لا	نعم	لا	لا	لا	نعم	نعم	نعم	نعم	ربما	نعم	لا	لا
أنثى	26-35 سنة	متزوج/ة	6000-12000 جنيه مصري	مدينة	ثانوي	جامعة بكالوريوس /دبلوم	ثانوي	مربية منزل	لا	لا	لا	لا	نعم	الأهل	نعم	لا	ربما	ربما	نعم	لا	لا	لا	لا	ربما	لا	لا	ربما	ربما	ربما	لا	لا	ربما	نعم	نعم	نعم	نعم	لا	لا	لا	لا
أنثى	26-35 سنة	متزوج/ة	6000-12000 جنيه مصري	مدينة	جامعة بكالوريوس /دبلوم	ثانوي	ثانوي	عامل	نعم	لا	لا	لا	لا	أخرى	ربما	ربما	ربما	ربما	ربما	ربما	ربما	ربما	ربما	ربما	ربما	ربما	ربما	ربما	ربما	ربما	ربما	ربما	ربما	ربما	ربما	ربما	ربما	ربما	ربما	لا
أنثى	36-50 سنة	متزوج/ة	6000-12000 جنيه مصري	مدينة	جامعة بكالوريوس /دبلوم	جامعة بكالوريوس /دبلوم	ثانوي	عامل	لا	لا	نعم	لا	نعم	الإنترنت, الأصدقاء, الصحف - الكتب - المجلات, أخرى	ربما	نعم	نعم	نعم	نعم	لا	لا	لا	لا	لا	ربما	لا	نعم	لا	نعم	لا	لا	لا	نعم	نعم	نعم	نعم	لا	لا	نعم	لا
أنثى	36-50 سنة	متزوج/ة	6000-12000 جنيه مصري	مدينة	جامعة بكالوريوس /دبلوم	ابتدائي	ابتدائي	مربية منزل	لا	لا	نعم	لا	نعم	الإنترنت	نعم	نعم	ربما	نعم	نعم	لا	لا	لا	لا	لا	لا	لا	لا	لا	لا	ربما	لا	لا	نعم	نعم	نعم	نعم	ربما	ربما	نعم	لا
ذكر	36-50 سنة	متزوج/ة	6000-12000 جنيه مصري	ريف	شهادات عليا	ابتدائي	ابتدائي	مربية منزل	لا	لا	لا	لا	نعم	الإنترنت, التلفاز, الأصدقاء, الصحف - الكتب - المجلات	نعم	لا	لا	نعم	نعم	لا	لا	لا	لا	لا	نعم	لا	نعم	لا	لا	لا	لا	نعم	نعم	نعم	نعم	نعم	ربما	ربما	ربما	لا
أنثى	36-50 سنة	متزوج/ة	6000-12000 جنيه مصري	مدينة	جامعة بكالوريوس /دبلوم	ثانوي	ابتدائي	عامل	لا	نعم	لا	لا	نعم	الأهل	نعم	نعم	ربما	نعم	نعم	لا	لا	لا	لا	لا	لا	نعم	لا	لا	لا	لا	لا	نعم	نعم	نعم	نعم	نعم	نعم	ربما	لا	لا
ذكر	36-50 سنة	متزوج/ة	6000-12000 جنيه مصري	مدينة	جامعة بكالوريوس /دبلوم	ابتدائي	ابتدائي	عامل	لا	لا	لا	لا	نعم	الإنترنت	نعم	لا	نعم	نعم	نعم	لا	لا	لا	لا	لا	لا	لا	لا	لا	لا	لا	لا	لا	نعم	نعم	نعم	نعم	لا	لا	لا	لا
أنثى	51 سنة فأكثر	متزوج/ة	أقل من 6000 جنيه مصري	مدينة	جامعة بكالوريوس /دبلوم	ابتدائي	ابتدائي	مربية منزل	نعم	لا	لا	لا	نعم	الإنترنت, الأهل	نعم	نعم	ربما	نعم	نعم	لا	لا	لا	لا	لا	نعم	لا	نعم	لا	لا	لا	لا	ربما	ربما	نعم	نعم	نعم	ربما	ربما	لا	لا
أنثى	26-35 سنة	متزوج/ة	6000-12000 جنيه مصري	ريف	جامعة بكالوريوس /دبلوم	جامعة بكالوريوس /دبلوم	جامعة بكالوريوس /دبلوم	عامل	لا	لا	لا	لا	نعم	الإنترنت, المدرسة, الأصدقاء	نعم	لا	نعم	نعم	نعم	لا	لا	لا	لا	لا	نعم	لا	نعم	لا	ربما	لا	لا	ربما	نعم	ربما	نعم	ربما	ربما	ربما	ربما	نعم
أنثى	36-50 سنة	متزوج/ة	أقل من 6000 جنيه مصري	مدينة	ثانوي	ثانوي	جامعة بكالوريوس /دبلوم	مربية منزل	لا	لا	لا	لا	نعم	الصحف - الكتب - المجلات	نعم	لا	لا	نعم	ربما	لا	لا	لا	لا	لا	نعم	لا	ربما	لا	لا	لا	لا	نعم	نعم	نعم	نعم	نعم	ربما	ربما	لا	ربما
أنثى	18-25 سنة	أعزب\عزباء	أكثر من 12000 جنيه مصري	ريف	جامعة بكالوريوس /دبلوم	شهادات عليا	جامعة بكالوريوس /دبلوم	طالب	نعم	لا	ليس لدي شريك	لا	نعم	الإنترنت, الأهل	نعم	نعم	لا	ربما	نعم	لا	لا	لا	لا	لا	ربما	لا	ربما	لا	لا	لا	لا	ربما	نعم	نعم	نعم	نعم	نعم	نعم	لا	لا
أنثى	26-35 سنة	أعزب\عزباء	أقل من 6000 جنيه مصري	مدينة	جامعة بكالوريوس /دبلوم	ثانوي	جامعة بكالوريوس /دبلوم	عاطل عن العمل	لا	لا	لا	لا	نعم	الإنترنت, التلفاز, المدرسة, الأهل, الأصدقاء	نعم	ربما	لا	نعم	نعم	لا	لا	لا	لا	لا	لا	لا	لا	لا	لا	لا	لا	نعم	نعم	نعم	نعم	نعم	ربما	نعم	لا	لا
ذكر	26-35 سنة	متزوج/ة	6000-12000 جنيه مصري	مدينة	جامعة بكالوريوس /دبلوم	شهادات عليا	جامعة بكالوريوس /دبلوم	عامل	لا	لا	لا	لا	نعم	الإنترنت	ربما	ربما	ربما	ربما	نعم	ربما	ربما	ربما	ربما	ربما	ربما	ربما	ربما	ربما	ربما	ربما	ربما	ربما	نعم	نعم	نعم	نعم	نعم	نعم	لا	لا
أنثى	26-35 سنة	أعزب\عزباء	أقل من 6000 جنيه مصري	ريف	جامعة بكالوريوس /دبلوم	ابتدائي	ثانوي	عاطل عن العمل	نعم	لا	لا	لا	نعم	الطبيب	نعم	نعم	نعم	نعم	نعم	لا	لا	لا	لا	لا	لا	لا	ربما	لا	لا	لا	لا	نعم	نعم	نعم	نعم	نعم	ربما	لا	لا	لا
أنثى	18-25 سنة	متزوج/ة	6000-12000 جنيه مصري	مدينة	جامعة بكالوريوس /دبلوم	شهادات عليا	جامعة بكالوريوس /دبلوم	عامل	لا	لا	لا	لا	نعم	المدرسة	نعم	نعم	لا	لا	نعم	لا	لا	لا	لا	لا	لا	لا	نعم	لا	لا	لا	لا	ربما	نعم	نعم	نعم	نعم	نعم	نعم	لا	لا
أنثى	36-50 سنة	متزوج/ة	6000-12000 جنيه مصري	مدينة	جامعة بكالوريوس /دبلوم	شهادات عليا	جامعة بكالوريوس /دبلوم	عامل	لا	لا	لا	لا	نعم	الأصدقاء	نعم	نعم	نعم	نعم	نعم	لا	لا	لا	لا	لا	ربما	ربما	ربما	ربما	ربما	ربما	لا	ربما	نعم	نعم	نعم	نعم	نعم	نعم	لا	لا
أنثى	36-50 سنة	متزوج/ة	6000-12000 جنيه مصري	مدينة	شهادات عليا	ثانوي	ابتدائي	عامل	لا	لا	لا	نعم	نعم	الإنترنت	نعم	نعم	لا	نعم	نعم	لا	لا	لا	لا	لا	نعم	لا	لا	لا	لا	نعم	لا	لا	نعم	نعم	نعم	نعم	لا	نعم	لا	لا
أنثى	18-25 سنة	أعزب\عزباء	6000-12000 جنيه مصري	مدينة	جامعة بكالوريوس /دبلوم	ثانوي	شهادات عليا	طالب	لا	لا	ليس لدي شريك	لا	نعم	الإنترنت, التلفاز, الأصدقاء	نعم	لا	لا	لا	ربما	لا	لا	لا	لا	لا	ربما	لا	ربما	لا	ربما	لا	لا	ربما	نعم	نعم	نعم	نعم	نعم	نعم	لا	لا
أنثى	26-35 سنة	أعزب\عزباء	أقل من 6000 جنيه مصري	مدينة	جامعة بكالوريوس /دبلوم	ثانوي	جامعة بكالوريوس /دبلوم	عامل	نعم	لا	لا	لا	نعم	الأهل	نعم	ربما	نعم	نعم	نعم	لا	لا	لا	لا	لا	لا	لا	ربما	لا	ربما	لا	لا	لا	نعم	نعم	نعم	نعم	ربما	ربما	لا	لا
أنثى	26-35 سنة	متزوج/ة	أقل من 6000 جنيه مصري	مدينة	جامعة بكالوريوس /دبلوم	ابتدائي	ثانوي	عاطل عن العمل	لا	لا	لا	لا	لا	أخرى	ربما	ربما	ربما	ربما	نعم	ربما	ربما	ربما	ربما	ربما	ربما	ربما	ربما	ربما	ربما	ربما	لا	ربما	نعم	لا	ربما	ربما	نعم	لا	ربما	ربما
أنثى	18-25 سنة	أعزب\عزباء	6000-12000 جنيه مصري	ريف	جامعة بكالوريوس /دبلوم	ابتدائي	ابتدائي	عامل	لا	لا	لا	لا	نعم	الإنترنت, التلفاز, المدرسة, الأهل, الأصدقاء	ربما	لا	لا	ربما	نعم	لا	لا	لا	لا	لا	نعم	لا	لا	ربما	ربما	لا	لا	لا	نعم	نعم	نعم	نعم	ربما	ربما	ربما	لا
أنثى	36-50 سنة	متزوج/ة	6000-12000 جنيه مصري	مدينة	ثانوي	ابتدائي	ثانوي	مربية منزل	لا	لا	لا	لا	نعم	الإنترنت	ربما	ربما	لا	لا	نعم	ربما	ربما	ربما	ربما	لا	ربما	لا	ربما	لا	لا	ربما	لا	ربما	ربما	نعم	نعم	نعم	ربما	ربما	ربما	لا
أنثى	26-35 سنة	متزوج/ة	أقل من 6000 جنيه مصري	مدينة	جامعة بكالوريوس /دبلوم	ابتدائي	ابتدائي	عامل	نعم	لا	لا	لا	نعم	الصحف - الكتب - المجلات	نعم	نعم	ربما	نعم	نعم	لا	لا	لا	لا	لا	نعم	لا	ربما	لا	لا	لا	لا	نعم	نعم	نعم	نعم	نعم	ربما	ربما	نعم	لا
أنثى	18-25 سنة	أعزب\عزباء	6000-12000 جنيه مصري	مدينة	جامعة بكالوريوس /دبلوم	ثانوي	شهادات عليا	طالب	نعم	لا	ليس لدي شريك	لا	نعم	الإنترنت, الأهل	نعم	نعم	نعم	لا	نعم	لا	لا	لا	لا	لا	لا	لا	لا	لا	لا	لا	لا	لا	نعم	نعم	نعم	نعم	ربما	لا	لا	لا
أنثى	36-50 سنة	متزوج/ة	6000-12000 جنيه مصري	مدينة	جامعة بكالوريوس /دبلوم	ثانوي	ابتدائي	عاطل عن العمل	نعم	لا	لا	لا	نعم	الإنترنت, التلفاز, المدرسة, الأهل, الأصدقاء, الصحف - الكتب - المجلات, الطبيب, أخرى	نعم	نعم	لا	لا	نعم	لا	لا	لا	لا	لا	لا	لا	لا	لا	لا	لا	لا	لا	نعم	نعم	نعم	نعم	نعم	نعم	لا	لا
أنثى	18-25 سنة	أعزب\عزباء	6000-12000 جنيه مصري	مدينة	جامعة بكالوريوس /دبلوم	ثانوي	ابتدائي	عاطل عن العمل	لا	لا	لا	لا	نعم	الصحف - الكتب - المجلات	نعم	لا	نعم	نعم	نعم	لا	لا	لا	لا	لا	لا	لا	نعم	لا	لا	لا	لا	لا	نعم	نعم	نعم	نعم	ربما	ربما	لا	لا
أنثى	26-35 سنة	متزوج/ة	أقل من 6000 جنيه مصري	مدينة	جامعة بكالوريوس /دبلوم	ابتدائي	ثانوي	مربية منزل	لا	نعم	لا	لا	نعم	الأهل	نعم	نعم	لا	نعم	نعم	ربما	لا	لا	ربما	لا	نعم	ربما	نعم	لا	لا	لا	لا	ربما	نعم	نعم	نعم	ربما	ربما	ربما	لا	لا
أنثى	36-50 سنة	متزوج/ة	أقل من 6000 جنيه مصري	مدينة	جامعة بكالوريوس /دبلوم	ثانوي	ابتدائي	مربية منزل	لا	لا	لا	لا	نعم	أخرى	نعم	ربما	لا	نعم	نعم	لا	لا	لا	لا	لا	ربما	لا	ربما	لا	ربما	لا	لا	نعم	نعم	نعم	نعم	نعم	ربما	نعم	لا	لا
أنثى	18-25 سنة	أعزب\عزباء	أقل من 6000 جنيه مصري	مدينة	جامعة بكالوريوس /دبلوم	ابتدائي	ثانوي	طالب	لا	لا	لا	لا	نعم	الإنترنت	ربما	ربما	لا	نعم	نعم	لا	لا	لا	لا	لا	ربما	لا	ربما	لا	لا	لا	لا	نعم	نعم	نعم	نعم	نعم	ربما	ربما	ربما	لا
أنثى	18-25 سنة	متزوج/ة	أقل من 6000 جنيه مصري	مدينة	جامعة بكالوريوس /دبلوم	ابتدائي	ثانوي	مربية منزل	نعم	نعم	لا	لا	نعم	الإنترنت, المدرسة, الصحف - الكتب - المجلات	نعم	ربما	نعم	ربما	نعم	لا	لا	لا	لا	لا	ربما	لا	ربما	لا	ربما	لا	ربما	ربما	نعم	نعم	نعم	نعم	نعم	نعم	ربما	لا
أنثى	18-25 سنة	أعزب\عزباء	أقل من 6000 جنيه مصري	مدينة	جامعة بكالوريوس /دبلوم	جامعة بكالوريوس /دبلوم	جامعة بكالوريوس /دبلوم	طالب	لا	لا	لا	لا	نعم	الأصدقاء	نعم	لا	نعم	لا	نعم	لا	لا	لا	لا	لا	لا	لا	نعم	لا	نعم	لا	لا	نعم	نعم	نعم	نعم	نعم	نعم	نعم	لا	لا
أنثى	26-35 سنة	متزوج/ة	6000-12000 جنيه مصري	مدينة	جامعة بكالوريوس /دبلوم	ابتدائي	ابتدائي	عاطل عن العمل	لا	لا	لا	لا	نعم	الإنترنت, التلفاز, المدرسة, الأهل, الأصدقاء, الصحف - الكتب - المجلات, الطبيب, أخرى	نعم	لا	ربما	ربما	نعم	لا	لا	لا	لا	لا	نعم	لا	نعم	لا	لا	لا	لا	نعم	نعم	نعم	نعم	نعم	لا	لا	ربما	لا
ذكر	26-35 سنة	متزوج/ة	أقل من 6000 جنيه مصري	مدينة	جامعة بكالوريوس /دبلوم	ابتدائي	ابتدائي	عامل	لا	لا	لا	لا	نعم	الإنترنت, التلفاز, المدرسة, الصحف - الكتب - المجلات	نعم	لا	نعم	لا	نعم	لا	لا	لا	لا	لا	لا	لا	نعم	لا	ربما	لا	لا	ربما	نعم	نعم	نعم	نعم	لا	لا	نعم	لا
ذكر	26-35 سنة	متزوج/ة	6000-12000 جنيه مصري	مدينة	جامعة بكالوريوس /دبلوم	ابتدائي	ثانوي	عامل	نعم	لا	لا	لا	نعم	الأهل	نعم	لا	نعم	نعم	نعم	لا	لا	لا	لا	لا	لا	لا	نعم	لا	لا	لا	لا	لا	نعم	نعم	نعم	نعم	ربما	ربما	لا	لا
أنثى	51 سنة فأكثر	متزوج/ة	أقل من 6000 جنيه مصري	ريف	جامعة بكالوريوس /دبلوم	ابتدائي	جامعة بكالوريوس /دبلوم	متقاعد	لا	لا	لا	لا	نعم	الأهل, الأصدقاء	نعم	ربما	نعم	نعم	نعم	ربما	لا	نعم	لا	لا	لا	لا	ربما	لا	ربما	لا	لا	لا	نعم	نعم	نعم	نعم	ربما	ربما	لا	لا
أنثى	26-35 سنة	أعزب\عزباء	أقل من 6000 جنيه مصري	ريف	شهادات عليا	ثانوي	ثانوي	عامل	لا	لا	ليس لدي شريك	لا	نعم	الأهل	نعم	نعم	لا	لا	نعم	لا	لا	لا	لا	لا	نعم	لا	نعم	لا	لا	لا	لا	لا	نعم	نعم	نعم	نعم	ربما	ربما	ربما	لا
أنثى	36-50 سنة	متزوج/ة	6000-12000 جنيه مصري	مدينة	جامعة بكالوريوس /دبلوم	ثانوي	جامعة بكالوريوس /دبلوم	مربية منزل	لا	لا	لا	لا	نعم	التلفاز	نعم	نعم	نعم	نعم	ربما	لا	لا	لا	لا	لا	نعم	لا	نعم	لا	نعم	لا	لا	ربما	نعم	نعم	نعم	نعم	ربما	ربما	ربما	لا
أنثى	18-25 سنة	أعزب\عزباء	6000-12000 جنيه مصري	مدينة	جامعة بكالوريوس /دبلوم	ابتدائي	ابتدائي	عاطل عن العمل	لا	لا	ليس لدي شريك	لا	نعم	الأهل, أخرى	ربما	لا	نعم	ربما	نعم	لا	لا	ربما	لا	ربما	ربما	لا	نعم	لا	ربما	لا	لا	لا	نعم	نعم	ربما	ربما	ربما	لا	ربما	ربما
أنثى	18-25 سنة	أعزب\عزباء	6000-12000 جنيه مصري	ريف	جامعة بكالوريوس /دبلوم	ثانوي	ثانوي	عامل	نعم	لا	لا	لا	نعم	الإنترنت, التلفاز, المدرسة, الأصدقاء	نعم	نعم	نعم	نعم	نعم	لا	لا	لا	لا	لا	نعم	لا	لا	لا	ربما	لا	لا	لا	نعم	نعم	نعم	لا	لا	نعم	لا	لا
أنثى	26-35 سنة	متزوج/ة	أكثر من 12000 جنيه مصري	مدينة	جامعة بكالوريوس /دبلوم	جامعة بكالوريوس /دبلوم	جامعة بكالوريوس /دبلوم	مربية منزل	لا	لا	لا	لا	نعم	الإنترنت, المدرسة	نعم	نعم	نعم	نعم	نعم	لا	ربما	ربما	ربما	نعم	ربما	ربما	نعم	ربما	نعم	ربما	ربما	نعم	لا	لا	نعم	لا	لا	لا	نعم	نعم
ذكر	18-25 سنة	أعزب\عزباء	6000-12000 جنيه مصري	ريف	جامعة بكالوريوس /دبلوم	ثانوي	ثانوي	طالب	نعم	نعم	ليس لدي شريك	لا	نعم	الإنترنت, التلفاز, الأهل, الصحف - الكتب - المجلات, أخرى	نعم	نعم	ربما	نعم	نعم	لا	لا	ربما	لا	لا	ربما	نعم	نعم	لا	ربما	لا	لا	ربما	نعم	نعم	نعم	نعم	لا	لا	نعم	ربما
ذكر	26-35 سنة	أعزب\عزباء	أكثر من 12000 جنيه مصري	ريف	جامعة بكالوريوس /دبلوم	جامعة بكالوريوس /دبلوم	ثانوي	عامل	لا	نعم	ليس لدي شريك	نعم	نعم	أخرى	نعم	لا	ربما	لا	نعم	لا	لا	لا	لا	لا	لا	لا	لا	لا	لا	لا	لا	لا	نعم	نعم	نعم	نعم	ربما	ربما	لا	لا
ذكر	18-25 سنة	أعزب\عزباء	أكثر من 12000 جنيه مصري	ريف	جامعة بكالوريوس /دبلوم	جامعة بكالوريوس /دبلوم	ثانوي	طالب	لا	لا	لا	لا	نعم	الإنترنت, المدرسة, الأهل, الأصدقاء, أخرى	نعم	ربما	لا	ربما	نعم	لا	لا	ربما	لا	نعم	ربما	لا	لا	ربما	لا	لا	لا	ربما	نعم	نعم	نعم	نعم	ربما	ربما	لا	لا
ذكر	26-35 سنة	أعزب\عزباء	6000-12000 جنيه مصري	ريف	جامعة بكالوريوس /دبلوم	ثانوي	ثانوي	عاطل عن العمل	لا	لا	ليس لدي شريك	لا	نعم	الأصدقاء	نعم	لا	لا	نعم	نعم	لا	لا	لا	لا	لا	لا	لا	لا	لا	لا	لا	لا	ربما	نعم	نعم	نعم	نعم	ربما	ربما	ربما	ربما
ذكر	51 سنة فأكثر	متزوج/ة	6000-12000 جنيه مصري	ريف	ثانوي	ثانوي	جامعة بكالوريوس /دبلوم	عاطل عن العمل	لا	لا	لا	لا	نعم	الإنترنت, الأصدقاء	نعم	نعم	نعم	ربما	نعم	لا	لا	لا	لا	ربما	ربما	لا	نعم	لا	لا	لا	لا	لا	نعم	نعم	نعم	نعم	لا	لا	ربما	لا
أنثى	36-50 سنة	متزوج/ة	6000-12000 جنيه مصري	ريف	جامعة بكالوريوس /دبلوم	ابتدائي	ابتدائي	مربية منزل	نعم	لا	لا	لا	نعم	الأهل, الأصدقاء, الصحف - الكتب - المجلات	نعم	نعم	لا	نعم	نعم	لا	لا	لا	لا	ربما	نعم	ربما	ربما	لا	لا	لا	لا	ربما	نعم	نعم	نعم	نعم	نعم	نعم	لا	لا
ذكر	36-50 سنة	متزوج/ة	أقل من 6000 جنيه مصري	ريف	ثانوي	ابتدائي	ابتدائي	عامل	لا	لا	نعم	لا	نعم	الأصدقاء	ربما	نعم	نعم	نعم	نعم	لا	لا	لا	لا	نعم	ربما	لا	ربما	ربما	لا	ربما	لا	لا	نعم	نعم	نعم	نعم	نعم	نعم	لا	ربما
أنثى	36-50 سنة	متزوج/ة	أقل من 6000 جنيه مصري	مدينة	ثانوي	ثانوي	ابتدائي	مربية منزل	لا	لا	لا	لا	نعم	أخرى	ربما	لا	ربما	نعم	نعم	لا	لا	لا	لا	لا	لا	لا	ربما	لا	لا	لا	لا	نعم	نعم	نعم	نعم	نعم	ربما	ربما	لا	لا
أنثى	36-50 سنة	متزوج/ة	6000-12000 جنيه مصري	مدينة	ثانوي	ثانوي	ابتدائي	مربية منزل	لا	لا	لا	لا	نعم	الأهل	نعم	لا	ربما	ربما	نعم	لا	لا	لا	لا	لا	لا	لا	ربما	لا	لا	لا	لا	نعم	نعم	نعم	نعم	نعم	ربما	ربما	لا	لا
أنثى	36-50 سنة	متزوج/ة	6000-12000 جنيه مصري	ريف	جامعة بكالوريوس /دبلوم	ثانوي	ابتدائي	مربية منزل	لا	لا	لا	لا	نعم	الإنترنت, الأصدقاء, الصحف - الكتب - المجلات	نعم	لا	ربما	ربما	نعم	لا	لا	لا	لا	لا	لا	لا	ربما	لا	ربما	لا	لا	ربما	نعم	نعم	نعم	نعم	ربما	ربما	لا	لا
أنثى	36-50 سنة	متزوج/ة	أقل من 6000 جنيه مصري	ريف	جامعة بكالوريوس /دبلوم	جامعة بكالوريوس /دبلوم	ابتدائي	متقاعد	نعم	لا	لا	لا	نعم	الأصدقاء	نعم	نعم	لا	نعم	نعم	لا	لا	ربما	لا	ربما	ربما	ربما	ربما	لا	ربما	لا	لا	ربما	لا	نعم	نعم	نعم	لا	ربما	لا	لا
ذكر	18-25 سنة	أعزب\عزباء	أكثر من 12000 جنيه مصري	ريف	جامعة بكالوريوس /دبلوم	ثانوي	ابتدائي	طالب	نعم	لا	لا	لا	نعم	الطبيب	نعم	نعم	ربما	لا	نعم	لا	لا	لا	لا	لا	لا	لا	نعم	لا	لا	لا	لا	لا	نعم	نعم	نعم	نعم	ربما	ربما	لا	لا
أنثى	36-50 سنة	متزوج/ة	6000-12000 جنيه مصري	ريف	ثانوي	ثانوي	ثانوي	مربية منزل	لا	لا	لا	لا	نعم	الأهل	نعم	ربما	لا	ربما	ربما	لا	لا	لا	لا	لا	ربما	ربما	ربما	ربما	ربما	لا	لا	ربما	نعم	نعم	نعم	ربما	ربما	ربما	ربما	لا
أنثى	26-35 سنة	متزوج/ة	أقل من 6000 جنيه مصري	مدينة	جامعة بكالوريوس /دبلوم	ابتدائي	ابتدائي	مربية منزل	نعم	لا	لا	لا	نعم	الإنترنت	لا	نعم	لا	نعم	نعم	لا	لا	لا	لا	لا	لا	لا	لا	لا	لا	لا	لا	لا	نعم	نعم	نعم	ربما	ربما	لا	لا	لا
أنثى	26-35 سنة	متزوج/ة	أقل من 6000 جنيه مصري	ريف	جامعة بكالوريوس /دبلوم	ثانوي	ثانوي	مربية منزل	لا	لا	لا	لا	نعم	الإنترنت, التلفاز, المدرسة, الأصدقاء, الصحف - الكتب - المجلات	نعم	نعم	نعم	نعم	نعم	لا	لا	لا	لا	لا	لا	لا	لا	لا	نعم	لا	لا	نعم	نعم	نعم	نعم	نعم	نعم	نعم	ربما	لا
أنثى	36-50 سنة	متزوج/ة	6000-12000 جنيه مصري	ريف	جامعة بكالوريوس /دبلوم	ابتدائي	ابتدائي	مربية منزل	نعم	لا	لا	لا	لا	الأهل	لا	نعم	نعم	نعم	نعم	نعم	لا	نعم	لا	نعم	نعم	لا	لا	لا	لا	لا	لا	نعم	نعم	لا	نعم	نعم	نعم	نعم	لا	لا
أنثى	26-35 سنة	متزوج/ة	6000-12000 جنيه مصري	ريف	جامعة بكالوريوس /دبلوم	جامعة بكالوريوس /دبلوم	جامعة بكالوريوس /دبلوم	مربية منزل	لا	لا	لا	لا	نعم	الأصدقاء	ربما	نعم	لا	لا	نعم	لا	لا	لا	لا	لا	نعم	لا	لا	لا	لا	لا	لا	لا	نعم	نعم	نعم	نعم	لا	لا	ربما	لا
ذكر	18-25 سنة	أعزب\عزباء	6000-12000 جنيه مصري	ريف	ثانوي	ثانوي	جامعة بكالوريوس /دبلوم	عامل	لا	لا	ليس لدي شريك	لا	نعم	الأصدقاء	نعم	نعم	نعم	نعم	نعم	لا	لا	لا	لا	ربما	لا	لا	لا	لا	لا	ربما	لا	ربما	نعم	نعم	نعم	نعم	ربما	ربما	لا	ربما
ذكر	26-35 سنة	متزوج/ة	أقل من 6000 جنيه مصري	مدينة	جامعة بكالوريوس /دبلوم	ثانوي	ثانوي	عامل	لا	لا	لا	لا	نعم	الإنترنت	نعم	لا	ربما	نعم	نعم	ربما	لا	لا	لا	لا	ربما	لا	ربما	لا	لا	لا	لا	ربما	نعم	نعم	نعم	نعم	ربما	نعم	لا	لا
أنثى	51 سنة فأكثر	متزوج/ة	أقل من 6000 جنيه مصري	ريف	ثانوي	ثانوي	ثانوي	مربية منزل	لا	لا	لا	لا	نعم	الإنترنت, التلفاز, الأصدقاء, الصحف - الكتب - المجلات	ربما	لا	لا	نعم	نعم	لا	لا	لا	لا	لا	ربما	لا	ربما	لا	لا	لا	لا	ربما	نعم	نعم	نعم	نعم	نعم	نعم	لا	لا
أنثى	36-50 سنة	متزوج/ة	أقل من 6000 جنيه مصري	مدينة	جامعة بكالوريوس /دبلوم	ابتدائي	ابتدائي	مربية منزل	نعم	لا	لا	لا	نعم	الأصدقاء	نعم	نعم	نعم	نعم	نعم	لا	لا	لا	لا	لا	نعم	لا	لا	ربما	لا	لا	لا	نعم	نعم	نعم	نعم	نعم	ربما	ربما	ربما	لا
أنثى	26-35 سنة	متزوج/ة	6000-12000 جنيه مصري	ريف	شهادات عليا	شهادات عليا	جامعة بكالوريوس /دبلوم	مربية منزل	لا	لا	لا	لا	نعم	الإنترنت, التلفاز, المدرسة, الأهل, الأصدقاء, الصحف - الكتب - المجلات	نعم	ربما	لا	لا	نعم	لا	لا	لا	لا	لا	لا	لا	ربما	لا	لا	لا	لا	لا	نعم	نعم	نعم	نعم	ربما	ربما	لا	لا
أنثى	26-35 سنة	متزوج/ة	أكثر من 12000 جنيه مصري	مدينة	شهادات عليا	شهادات عليا	شهادات عليا	مربية منزل	نعم	لا	لا	لا	نعم	المدرسة	نعم	لا	لا	لا	ربما	لا	لا	لا	لا	لا	لا	لا	نعم	لا	لا	لا	لا	نعم	نعم	نعم	نعم	نعم	نعم	ربما	لا	لا
أنثى	51 سنة فأكثر	متزوج/ة	6000-12000 جنيه مصري	ريف	جامعة بكالوريوس /دبلوم	ثانوي	ابتدائي	عامل	لا	لا	لا	لا	نعم	الإنترنت, التلفاز, المدرسة	نعم	نعم	نعم	نعم	نعم	لا	لا	لا	لا	لا	ربما	لا	لا	لا	لا	لا	لا	لا	نعم	نعم	نعم	نعم	ربما	لا	لا	لا
ذكر	51 سنة فأكثر	متزوج/ة	6000-12000 جنيه مصري	ريف	جامعة بكالوريوس /دبلوم	ابتدائي	ثانوي	عامل	لا	لا	لا	لا	نعم	الأصدقاء	نعم	ربما	لا	ربما	نعم	لا	لا	لا	لا	لا	ربما	ربما	ربما	لا	لا	لا	لا	ربما	نعم	نعم	نعم	نعم	نعم	نعم	لا	لا
أنثى	26-35 سنة	متزوج/ة	أقل من 6000 جنيه مصري	مدينة	جامعة بكالوريوس /دبلوم	ثانوي	ابتدائي	عامل	لا	لا	نعم	لا	نعم	الأصدقاء	نعم	لا	ربما	لا	نعم	لا	لا	لا	لا	لا	لا	لا	نعم	لا	نعم	لا	لا	نعم	نعم	نعم	نعم	نعم	لا	لا	لا	لا
أنثى	51 سنة فأكثر	متزوج/ة	أقل من 6000 جنيه مصري	مدينة	جامعة بكالوريوس /دبلوم	ثانوي	جامعة بكالوريوس /دبلوم	مربية منزل	لا	لا	لا	لا	نعم	الأصدقاء	نعم	لا	نعم	لا	نعم	لا	لا	لا	لا	لا	لا	لا	نعم	لا	لا	لا	لا	نعم	نعم	نعم	نعم	لا	لا	لا	لا	ربما
ذكر	26-35 سنة	أعزب\عزباء	6000-12000 جنيه مصري	ريف	جامعة بكالوريوس /دبلوم	جامعة بكالوريوس /دبلوم	ثانوي	عامل	لا	لا	ليس لدي شريك	لا	لا	الإنترنت	نعم	نعم	ربما	ربما	نعم	لا	لا	لا	ربما	لا	لا	لا	نعم	لا	نعم	لا	لا	لا	نعم	نعم	نعم	نعم	ربما	ربما	نعم	لا
ذكر	26-35 سنة	أعزب\عزباء	أقل من 6000 جنيه مصري	ريف	جامعة بكالوريوس /دبلوم	جامعة بكالوريوس /دبلوم	ابتدائي	عاطل عن العمل	لا	لا	ليس لدي شريك	لا	نعم	الإنترنت, التلفاز, المدرسة, الأهل, الأصدقاء, الصحف - الكتب - المجلات, الطبيب, أخرى	نعم	لا	لا	لا	لا	لا	لا	لا	لا	لا	لا	لا	لا	لا	لا	لا	لا	لا	نعم	نعم	نعم	نعم	نعم	نعم	لا	لا
أنثى	36-50 سنة	متزوج/ة	أكثر من 12000 جنيه مصري	مدينة	جامعة بكالوريوس /دبلوم	جامعة بكالوريوس /دبلوم	ثانوي	عامل	نعم	لا	لا	لا	نعم	أخرى	نعم	نعم	ربما	ربما	ربما	لا	لا	لا	لا	لا	نعم	ربما	نعم	لا	لا	لا	لا	ربما	نعم	نعم	نعم	نعم	ربما	ربما	لا	لا
أنثى	26-35 سنة	متزوج/ة	6000-12000 جنيه مصري	ريف	جامعة بكالوريوس /دبلوم	ثانوي	ثانوي	عاطل عن العمل	لا	لا	لا	لا	نعم	الأهل	نعم	لا	نعم	ربما	نعم	لا	لا	ربما	لا	لا	نعم	لا	لا	لا	لا	لا	لا	لا	نعم	نعم	نعم	نعم	لا	ربما	ربما	لا
ذكر	18-25 سنة	أعزب\عزباء	6000-12000 جنيه مصري	ريف	ابتدائي	ثانوي	ثانوي	عامل	لا	لا	ليس لدي شريك	لا	نعم	الإنترنت, التلفاز, المدرسة, الأصدقاء, الطبيب	لا	لا	نعم	ربما	نعم	لا	لا	ربما	لا	لا	ربما	لا	نعم	لا	لا	لا	لا	نعم	نعم	نعم	نعم	ربما	لا	ربما	ربما	لا
أنثى	18-25 سنة	أعزب\عزباء	6000-12000 جنيه مصري	مدينة	جامعة بكالوريوس /دبلوم	جامعة بكالوريوس /دبلوم	جامعة بكالوريوس /دبلوم	طالب	نعم	لا	ليس لدي شريك	لا	نعم	الإنترنت, المدرسة, الصحف - الكتب - المجلات, أخرى	نعم	نعم	نعم	نعم	نعم	لا	لا	لا	لا	لا	ربما	لا	ربما	لا	لا	لا	لا	لا	نعم	نعم	نعم	نعم	ربما	ربما	لا	لا
أنثى	18-25 سنة	متزوج/ة	6000-12000 جنيه مصري	مدينة	ثانوي	ثانوي	ثانوي	مربية منزل	لا	لا	لا	لا	نعم	الأصدقاء	نعم	ربما	ربما	ربما	ربما	لا	ربما	لا	لا	ربما	ربما	ربما	ربما	ربما	ربما	ربما	ربما	نعم	نعم	نعم	ربما	ربما	لا	لا	لا	لا
أنثى	26-35 سنة	متزوج/ة	أقل من 6000 جنيه مصري	ريف	ثانوي	جامعة بكالوريوس /دبلوم	ثانوي	مربية منزل	نعم	لا	لا	لا	نعم	الأصدقاء	نعم	نعم	نعم	ربما	نعم	لا	لا	لا	لا	لا	نعم	لا	لا	لا	ربما	لا	لا	نعم	لا	لا	لا	لا	لا	ربما	نعم	ربما
أنثى	18-25 سنة	متزوج/ة	أقل من 6000 جنيه مصري	ريف	جامعة بكالوريوس /دبلوم	جامعة بكالوريوس /دبلوم	ثانوي	مربية منزل	لا	لا	لا	لا	نعم	الأصدقاء	نعم	نعم	ربما	نعم	ربما	لا	لا	لا	لا	لا	نعم	لا	نعم	ربما	ربما	لا	لا	ربما	نعم	نعم	ربما	نعم	ربما	ربما	ربما	لا
أنثى	18-25 سنة	متزوج/ة	أقل من 6000 جنيه مصري	ريف	جامعة بكالوريوس /دبلوم	ابتدائي	ثانوي	مربية منزل	لا	لا	لا	لا	نعم	المدرسة	نعم	ربما	نعم	ربما	نعم	ربما	ربما	لا	لا	لا	ربما	لا	نعم	لا	ربما	لا	لا	ربما	نعم	نعم	نعم	ربما	لا	لا	نعم	لا
أنثى	26-35 سنة	متزوج/ة	أقل من 6000 جنيه مصري	ريف	جامعة بكالوريوس /دبلوم	ثانوي	ابتدائي	مربية منزل	لا	لا	لا	لا	نعم	الإنترنت, المدرسة, الأصدقاء	نعم	ربما	ربما	لا	لا	لا	لا	لا	لا	لا	ربما	لا	ربما	لا	ربما	لا	لا	ربما	نعم	نعم	نعم	نعم	لا	لا	نعم	لا
أنثى	18-25 سنة	أعزب\عزباء	أقل من 6000 جنيه مصري	مدينة	جامعة بكالوريوس /دبلوم	ثانوي	جامعة بكالوريوس /دبلوم	عامل	نعم	لا	ليس لدي شريك	لا	نعم	المدرسة, الأهل	نعم	لا	ربما	ربما	نعم	ربما	لا	ربما	لا	ربما	ربما	نعم	لا	لا	لا	ربما	لا	نعم	نعم	نعم	نعم	ربما	ربما	نعم	لا	لا
أنثى	18-25 سنة	أعزب\عزباء	أقل من 6000 جنيه مصري	مدينة	جامعة بكالوريوس /دبلوم	ثانوي	جامعة بكالوريوس /دبلوم	طالب	لا	لا	ليس لدي شريك	لا	نعم	الإنترنت, المدرسة, الأهل, الصحف - الكتب - المجلات	نعم	نعم	نعم	نعم	نعم	ربما	ربما	ربما	ربما	ربما	ربما	ربما	ربما	ربما	ربما	لا	لا	نعم	نعم	نعم	نعم	نعم	لا	لا	لا	لا
ذكر	26-35 سنة	أعزب\عزباء	أكثر من 12000 جنيه مصري	ريف	شهادات عليا	ثانوي	ثانوي	عامل	لا	لا	لا	لا	نعم	الأصدقاء	نعم	ربما	نعم	ربما	نعم	نعم	لا	نعم	ربما	نعم	ربما	ربما	لا	ربما	لا	لا	لا	نعم	نعم	ربما	نعم	لا	لا	نعم	نعم	لا
أنثى	18-25 سنة	متزوج/ة	6000-12000 جنيه مصري	ريف	جامعة بكالوريوس /دبلوم	ابتدائي	جامعة بكالوريوس /دبلوم	مربية منزل	لا	لا	لا	لا	نعم	الإنترنت	نعم	ربما	لا	لا	نعم	لا	لا	لا	لا	لا	لا	لا	نعم	لا	ربما	ربما	لا	ربما	نعم	نعم	نعم	نعم	ربما	ربما	ربما	لا
أنثى	18-25 سنة	متزوج/ة	أقل من 6000 جنيه مصري	ريف	ثانوي	جامعة بكالوريوس /دبلوم	ثانوي	مربية منزل	لا	لا	لا	لا	نعم	الأصدقاء	ربما	لا	نعم	نعم	نعم	لا	لا	لا	لا	لا	ربما	لا	نعم	لا	ربما	لا	لا	نعم	نعم	نعم	نعم	نعم	نعم	نعم	لا	لا
ذكر	26-35 سنة	متزوج/ة	أقل من 6000 جنيه مصري	ريف	جامعة بكالوريوس /دبلوم	جامعة بكالوريوس /دبلوم	ثانوي	عامل	لا	لا	لا	لا	لا	أخرى	ربما	لا	ربما	ربما	لا	ربما	ربما	ربما	ربما	نعم	ربما	لا	لا	ربما	ربما	ربما	ربما	ربما	ربما	لا	نعم	لا	لا	لا	لا	نعم
أنثى	26-35 سنة	متزوج/ة	6000-12000 جنيه مصري	ريف	ثانوي	ثانوي	ثانوي	عامل	لا	لا	لا	لا	نعم	الإنترنت, الأصدقاء, أخرى	ربما	ربما	ربما	نعم	نعم	لا	لا	لا	لا	لا	نعم	لا	ربما	لا	لا	لا	لا	لا	نعم	نعم	نعم	نعم	ربما	لا	نعم	لا
أنثى	18-25 سنة	متزوج/ة	أقل من 6000 جنيه مصري	مدينة	ثانوي	ثانوي	ثانوي	مربية منزل	لا	لا	لا	لا	نعم	الطبيب	ربما	لا	ربما	ربما	نعم	ربما	لا	لا	لا	لا	ربما	لا	نعم	لا	ربما	لا	لا	ربما	نعم	نعم	نعم	نعم	ربما	ربما	لا	لا
أنثى	26-35 سنة	أعزب\عزباء	6000-12000 جنيه مصري	مدينة	جامعة بكالوريوس /دبلوم	جامعة بكالوريوس /دبلوم	جامعة بكالوريوس /دبلوم	طالب	نعم	لا	ليس لدي شريك	لا	نعم	الصحف - الكتب - المجلات, الطبيب	نعم	نعم	نعم	نعم	نعم	لا	لا	لا	لا	لا	نعم	لا	نعم	لا	لا	لا	لا	لا	نعم	نعم	نعم	نعم	نعم	نعم	لا	لا
أنثى	18-25 سنة	أعزب\عزباء	أقل من 6000 جنيه مصري	مدينة	جامعة بكالوريوس /دبلوم	ثانوي	جامعة بكالوريوس /دبلوم	طالب	نعم	لا	ليس لدي شريك	لا	نعم	الإنترنت	نعم	نعم	ربما	ربما	ربما	لا	لا	لا	لا	لا	ربما	ربما	نعم	لا	لا	لا	لا	نعم	نعم	ربما	ربما	ربما	لا	لا	ربما	ربما
أنثى	18-25 سنة	أعزب\عزباء	6000-12000 جنيه مصري	مدينة	جامعة بكالوريوس /دبلوم	ثانوي	ثانوي	طالب	لا	لا	لا	لا	نعم	الإنترنت, التلفاز, المدرسة, الأهل, الأصدقاء, الصحف - الكتب - المجلات, الطبيب	نعم	ربما	ربما	ربما	نعم	ربما	ربما	ربما	ربما	لا	ربما	ربما	ربما	ربما	ربما	لا	لا	نعم	ربما	ربما	ربما	ربما	لا	لا	نعم	ربما
أنثى	18-25 سنة	أعزب\عزباء	أقل من 6000 جنيه مصري	مدينة	جامعة بكالوريوس /دبلوم	ثانوي	جامعة بكالوريوس /دبلوم	عامل	نعم	لا	ليس لدي شريك	لا	نعم	أخرى	نعم	ربما	نعم	ربما	نعم	لا	لا	لا	لا	لا	ربما	لا	نعم	لا	لا	لا	لا	لا	نعم	نعم	نعم	ربما	ربما	ربما	لا	لا
أنثى	18-25 سنة	متزوج/ة	أكثر من 12000 جنيه مصري	ريف	جامعة بكالوريوس /دبلوم	جامعة بكالوريوس /دبلوم	ثانوي	مربية منزل	لا	لا	لا	لا	نعم	الأصدقاء	نعم	لا	لا	نعم	نعم	ربما	لا	ربما	ربما	لا	لا	لا	ربما	ربما	ربما	لا	لا	لا	نعم	نعم	نعم	نعم	ربما	ربما	لا	لا
أنثى	18-25 سنة	أعزب\عزباء	6000-12000 جنيه مصري	مدينة	جامعة بكالوريوس /دبلوم	ثانوي	جامعة بكالوريوس /دبلوم	عامل	نعم	لا	ليس لدي شريك	لا	نعم	الإنترنت, الأهل, الطبيب	نعم	لا	لا	نعم	نعم	لا	لا	لا	لا	لا	ربما	لا	نعم	لا	لا	لا	لا	نعم	نعم	نعم	نعم	نعم	ربما	ربما	لا	لا
أنثى	26-35 سنة	متزوج/ة	6000-12000 جنيه مصري	مدينة	جامعة بكالوريوس /دبلوم	ثانوي	جامعة بكالوريوس /دبلوم	مربية منزل	لا	لا	لا	لا	نعم	الإنترنت	نعم	ربما	نعم	ربما	نعم	نعم	ربما	نعم	ربما	لا	ربما	لا	ربما	لا	لا	لا	لا	ربما	ربما	لا	ربما	ربما	لا	لا	نعم	ربما
أنثى	26-35 سنة	متزوج/ة	6000-12000 جنيه مصري	مدينة	جامعة بكالوريوس /دبلوم	ثانوي	جامعة بكالوريوس /دبلوم	مربية منزل	لا	لا	لا	لا	نعم	الإنترنت	نعم	لا	نعم	ربما	نعم	لا	لا	ربما	لا	لا	ربما	ربما	نعم	لا	ربما	لا	لا	ربما	نعم	ربما	ربما	لا	لا	لا	ربما	لا
أنثى	26-35 سنة	متزوج/ة	أقل من 6000 جنيه مصري	مدينة	جامعة بكالوريوس /دبلوم	جامعة بكالوريوس /دبلوم	جامعة بكالوريوس /دبلوم	مربية منزل	لا	لا	لا	لا	لا	الإنترنت	ربما	ربما	لا	لا	نعم	ربما	ربما	نعم	لا	ربما	ربما	ربما	ربما	لا	لا	لا	لا	نعم	نعم	نعم	لا	نعم	لا	لا	لا	لا
أنثى	26-35 سنة	متزوج/ة	6000-12000 جنيه مصري	مدينة	جامعة بكالوريوس /دبلوم	جامعة بكالوريوس /دبلوم	ثانوي	مربية منزل	لا	لا	لا	لا	نعم	الإنترنت	ربما	لا	ربما	لا	نعم	لا	لا	ربما	لا	لا	ربما	لا	ربما	لا	لا	ربما	لا	ربما	نعم	نعم	نعم	ربما	لا	لا	ربما	لا
ذكر	18-25 سنة	أعزب\عزباء	6000-12000 جنيه مصري	مدينة	جامعة بكالوريوس /دبلوم	جامعة بكالوريوس /دبلوم	ثانوي	طالب	نعم	لا	لا	لا	نعم	الطبيب	نعم	نعم	نعم	نعم	نعم	لا	لا	لا	لا	لا	نعم	لا	لا	لا	نعم	لا	لا	نعم	نعم	نعم	نعم	نعم	لا	نعم	لا	لا
ذكر	26-35 سنة	متزوج/ة	6000-12000 جنيه مصري	مدينة	جامعة بكالوريوس /دبلوم	جامعة بكالوريوس /دبلوم	ثانوي	عامل	لا	لا	لا	لا	نعم	الأصدقاء	لا	ربما	نعم	نعم	نعم	لا	لا	لا	لا	لا	لا	لا	لا	لا	لا	لا	لا	لا	نعم	نعم	نعم	نعم	ربما	ربما	ربما	لا
أنثى	18-25 سنة	متزوج/ة	6000-12000 جنيه مصري	مدينة	جامعة بكالوريوس /دبلوم	جامعة بكالوريوس /دبلوم	ثانوي	مربية منزل	نعم	لا	لا	لا	نعم	الأهل	نعم	لا	ربما	ربما	نعم	لا	لا	لا	لا	لا	لا	لا	نعم	لا	ربما	لا	لا	ربما	نعم	نعم	نعم	نعم	نعم	لا	ربما	لا
أنثى	26-35 سنة	متزوج/ة	أقل من 6000 جنيه مصري	مدينة	جامعة بكالوريوس /دبلوم	جامعة بكالوريوس /دبلوم	ثانوي	مربية منزل	نعم	لا	لا	لا	نعم	الأهل, الأصدقاء	نعم	نعم	نعم	نعم	نعم	لا	لا	لا	لا	لا	نعم	ربما	نعم	لا	ربما	ربما	لا	لا	نعم	نعم	نعم	نعم	ربما	ربما	لا	لا
ذكر	26-35 سنة	متزوج/ة	أقل من 6000 جنيه مصري	مدينة	جامعة بكالوريوس /دبلوم	جامعة بكالوريوس /دبلوم	جامعة بكالوريوس /دبلوم	عامل	لا	لا	لا	لا	نعم	الإنترنت, الأهل, الصحف - الكتب - المجلات	نعم	نعم	نعم	نعم	نعم	لا	لا	لا	لا	لا	لا	لا	نعم	لا	لا	لا	لا	لا	ربما	نعم	نعم	ربما	لا	ربما	ربما	لا
أنثى	36-50 سنة	متزوج/ة	أقل من 6000 جنيه مصري	مدينة	ثانوي	ثانوي	ثانوي	مربية منزل	لا	لا	لا	لا	نعم	أخرى	نعم	ربما	ربما	ربما	نعم	ربما	ربما	ربما	ربما	ربما	ربما	ربما	ربما	ربما	ربما	لا	لا	ربما	نعم	نعم	نعم	نعم	ربما	ربما	لا	لا
ذكر	51 سنة فأكثر	متزوج/ة	6000-12000 جنيه مصري	مدينة	جامعة بكالوريوس /دبلوم	ابتدائي	ابتدائي	عاطل عن العمل	لا	لا	ليس لدي شريك	لا	نعم	الأصدقاء	نعم	ربما	نعم	نعم	نعم	ربما	لا	ربما	ربما	لا	ربما	ربما	ربما	ربما	ربما	ربما	لا	نعم	ربما	ربما	نعم	ربما	ربما	ربما	ربما	لا
أنثى	18-25 سنة	أعزب\عزباء	أقل من 6000 جنيه مصري	مدينة	جامعة بكالوريوس /دبلوم	جامعة بكالوريوس /دبلوم	ثانوي	طالب	نعم	لا	ليس لدي شريك	لا	نعم	المدرسة	نعم	نعم	نعم	ربما	نعم	لا	ربما	لا	لا	ربما	لا	لا	ربما	ربما	ربما	لا	لا	ربما	نعم	ربما	نعم	ربما	ربما	لا	ربما	لا
أنثى	26-35 سنة	متزوج/ة	أكثر من 12000 جنيه مصري	مدينة	شهادات عليا	جامعة بكالوريوس /دبلوم	ثانوي	عامل	نعم	لا	لا	لا	نعم	الإنترنت, الصحف - الكتب - المجلات, الطبيب, أخرى	نعم	نعم	نعم	نعم	نعم	لا	لا	لا	لا	لا	لا	لا	نعم	لا	لا	لا	لا	لا	نعم	نعم	نعم	نعم	ربما	ربما	لا	لا
أنثى	51 سنة فأكثر	متزوج/ة	أقل من 6000 جنيه مصري	مدينة	ثانوي	ثانوي	ثانوي	مربية منزل	لا	لا	لا	لا	نعم	الصحف - الكتب - المجلات	نعم	نعم	نعم	نعم	نعم	لا	لا	لا	لا	لا	ربما	لا	لا	لا	ربما	ربما	لا	نعم	ربما	ربما	نعم	ربما	ربما	ربما	نعم	لا
أنثى	36-50 سنة	متزوج/ة	6000-12000 جنيه مصري	ريف	جامعة بكالوريوس /دبلوم	جامعة بكالوريوس /دبلوم	جامعة بكالوريوس /دبلوم	عامل	نعم	لا	لا	لا	نعم	الإنترنت, التلفاز, المدرسة, الأهل, الأصدقاء, الصحف - الكتب - المجلات, الطبيب, أخرى	نعم	لا	نعم	لا	نعم	لا	لا	لا	لا	لا	لا	لا	نعم	لا	لا	لا	لا	ربما	نعم	نعم	نعم	نعم	ربما	نعم	لا	لا
أنثى	18-25 سنة	أعزب\عزباء	6000-12000 جنيه مصري	مدينة	جامعة بكالوريوس /دبلوم	جامعة بكالوريوس /دبلوم	ثانوي	طالب	نعم	لا	لا	لا	نعم	الصحف - الكتب - المجلات	نعم	ربما	ربما	لا	نعم	لا	لا	لا	لا	لا	ربما	لا	نعم	لا	ربما	لا	لا	لا	نعم	نعم	نعم	نعم	ربما	لا	ربما	لا
أنثى	26-35 سنة	متزوج/ة	6000-12000 جنيه مصري	ريف	جامعة بكالوريوس /دبلوم	جامعة بكالوريوس /دبلوم	جامعة بكالوريوس /دبلوم	عامل	نعم	لا	لا	لا	نعم	أخرى	نعم	لا	لا	لا	ربما	لا	لا	لا	لا	لا	لا	لا	لا	لا	لا	لا	لا	لا	نعم	نعم	نعم	نعم	لا	لا	لا	لا
أنثى	36-50 سنة	متزوج/ة	أقل من 6000 جنيه مصري	مدينة	جامعة بكالوريوس /دبلوم	جامعة بكالوريوس /دبلوم	جامعة بكالوريوس /دبلوم	مربية منزل	لا	لا	لا	لا	نعم	الإنترنت, التلفاز, المدرسة, الأهل, الصحف - الكتب - المجلات	ربما	ربما	نعم	ربما	نعم	لا	لا	لا	لا	ربما	ربما	لا	ربما	لا	ربما	لا	لا	نعم	نعم	نعم	نعم	نعم	لا	لا	نعم	ربما
أنثى	26-35 سنة	متزوج/ة	أكثر من 12000 جنيه مصري	مدينة	جامعة بكالوريوس /دبلوم	جامعة بكالوريوس /دبلوم	جامعة بكالوريوس /دبلوم	عامل	نعم	لا	لا	لا	نعم	المدرسة, الصحف - الكتب - المجلات	نعم	نعم	لا	ربما	نعم	لا	لا	لا	لا	لا	لا	لا	لا	لا	لا	لا	لا	لا	نعم	نعم	نعم	نعم	لا	لا	لا	لا
ذكر	36-50 سنة	متزوج/ة	6000-12000 جنيه مصري	مدينة	جامعة بكالوريوس /دبلوم	ثانوي	ابتدائي	متقاعد	لا	لا	لا	لا	نعم	التلفاز	ربما	ربما	ربما	ربما	ربما	ربما	ربما	ربما	ربما	ربما	ربما	ربما	ربما	ربما	ربما	ربما	ربما	ربما	نعم	نعم	نعم	نعم	نعم	لا	لا	لا
أنثى	26-35 سنة	أعزب\عزباء	أقل من 6000 جنيه مصري	ريف	شهادات عليا	شهادات عليا	جامعة بكالوريوس /دبلوم	عامل	نعم	لا	ليس لدي شريك	لا	نعم	المدرسة, الأهل, الطبيب, أخرى	نعم	نعم	نعم	ربما	نعم	لا	لا	لا	لا	لا	ربما	ربما	ربما	لا	لا	لا	لا	لا	نعم	نعم	نعم	نعم	نعم	نعم	لا	لا
أنثى	26-35 سنة	أعزب\عزباء	أقل من 6000 جنيه مصري	ريف	شهادات عليا	جامعة بكالوريوس /دبلوم	جامعة بكالوريوس /دبلوم	عامل	نعم	لا	ليس لدي شريك	لا	نعم	الإنترنت, التلفاز, الصحف - الكتب - المجلات	نعم	لا	ربما	لا	نعم	لا	لا	لا	لا	لا	لا	لا	نعم	لا	لا	لا	لا	نعم	نعم	نعم	نعم	نعم	نعم	نعم	ربما	لا
أنثى	36-50 سنة	متزوج/ة	أقل من 6000 جنيه مصري	مدينة	ثانوي	جامعة بكالوريوس /دبلوم	ثانوي	مربية منزل	لا	لا	لا	لا	نعم	الإنترنت	نعم	نعم	لا	ربما	نعم	لا	لا	لا	لا	ربما	ربما	لا	نعم	لا	نعم	لا	ربما	ربما	نعم	نعم	نعم	نعم	نعم	نعم	لا	لا
أنثى	26-35 سنة	متزوج/ة	6000-12000 جنيه مصري	مدينة	جامعة بكالوريوس /دبلوم	جامعة بكالوريوس /دبلوم	جامعة بكالوريوس /دبلوم	عامل	نعم	لا	لا	لا	لا	الإنترنت, التلفاز, المدرسة, الأهل, الأصدقاء, الصحف - الكتب - المجلات	لا	لا	نعم	لا	نعم	لا	لا	لا	لا	لا	لا	لا	نعم	لا	لا	لا	لا	لا	لا	نعم	نعم	نعم	نعم	نعم	لا	لا
ذكر	36-50 سنة	متزوج/ة	أكثر من 12000 جنيه مصري	مدينة	شهادات عليا	جامعة بكالوريوس /دبلوم	جامعة بكالوريوس /دبلوم	عامل	نعم	لا	لا	لا	نعم	الصحف - الكتب - المجلات	نعم	نعم	نعم	لا	نعم	لا	لا	لا	لا	لا	لا	لا	لا	لا	لا	لا	لا	نعم	نعم	نعم	نعم	نعم	نعم	نعم	لا	لا
أنثى	18-25 سنة	أعزب\عزباء	أكثر من 12000 جنيه مصري	ريف	جامعة بكالوريوس /دبلوم	ثانوي	ثانوي	عامل	لا	لا	لا	لا	نعم	الأصدقاء	نعم	نعم	نعم	لا	نعم	لا	لا	لا	لا	لا	نعم	لا	لا	نعم	لا	لا	لا	نعم	نعم	نعم	نعم	نعم	لا	نعم	نعم	لا
ذكر	36-50 سنة	متزوج/ة	أكثر من 12000 جنيه مصري	ريف	جامعة بكالوريوس /دبلوم	جامعة بكالوريوس /دبلوم	ثانوي	عامل	نعم	لا	لا	لا	نعم	الإنترنت, المدرسة, الأصدقاء, الصحف - الكتب - المجلات, الطبيب	ربما	نعم	لا	نعم	ربما	لا	لا	لا	لا	لا	لا	لا	لا	لا	ربما	لا	لا	ربما	نعم	نعم	نعم	نعم	نعم	ربما	لا	لا
أنثى	26-35 سنة	متزوج/ة	أقل من 6000 جنيه مصري	مدينة	ثانوي	ابتدائي	ابتدائي	مربية منزل	لا	لا	ليس لدي شريك	لا	نعم	الأهل, الأصدقاء	نعم	ربما	لا	ربما	ربما	لا	ربما	ربما	ربما	ربما	ربما	ربما	ربما	ربما	ربما	ربما	لا	ربما	ربما	ربما	ربما	ربما	لا	لا	ربما	لا
أنثى	18-25 سنة	أعزب\عزباء	6000-12000 جنيه مصري	ريف	جامعة بكالوريوس /دبلوم	ثانوي	جامعة بكالوريوس /دبلوم	طالب	نعم	لا	ليس لدي شريك	لا	نعم	الإنترنت	نعم	ربما	ربما	لا	نعم	لا	لا	لا	لا	لا	ربما	ربما	لا	لا	نعم	لا	لا	لا	نعم	نعم	نعم	نعم	ربما	ربما	ربما	لا
أنثى	26-35 سنة	متزوج/ة	أكثر من 12000 جنيه مصري	مدينة	شهادات عليا	شهادات عليا	شهادات عليا	عامل	لا	لا	لا	لا	نعم	الإنترنت, الأهل	نعم	نعم	نعم	ربما	نعم	لا	لا	لا	لا	لا	نعم	لا	نعم	لا	لا	لا	لا	لا	نعم	نعم	نعم	نعم	لا	نعم	لا	لا
أنثى	18-25 سنة	أعزب\عزباء	6000-12000 جنيه مصري	مدينة	جامعة بكالوريوس /دبلوم	جامعة بكالوريوس /دبلوم	جامعة بكالوريوس /دبلوم	متقاعد	لا	لا	ليس لدي شريك	لا	نعم	الإنترنت, التلفاز, المدرسة	نعم	نعم	لا	لا	نعم	لا	لا	لا	لا	لا	ربما	لا	ربما	لا	لا	لا	لا	نعم	نعم	نعم	نعم	نعم	ربما	ربما	لا	لا
أنثى	18-25 سنة	متزوج/ة	أقل من 6000 جنيه مصري	مدينة	ثانوي	ثانوي	ثانوي	مربية منزل	لا	لا	لا	لا	نعم	المدرسة	نعم	نعم	نعم	ربما	نعم	نعم	ربما	ربما	ربما	ربما	ربما	لا	ربما	لا	ربما	لا	نعم	نعم	ربما	ربما	ربما	ربما	لا	لا	نعم	لا
ذكر	26-35 سنة	متزوج/ة	أقل من 6000 جنيه مصري	مدينة	شهادات عليا	ابتدائي	ابتدائي	عامل	لا	لا	لا	لا	نعم	الأصدقاء	نعم	ربما	ربما	ربما	نعم	لا	لا	لا	لا	لا	نعم	لا	ربما	لا	ربما	لا	لا	ربما	نعم	نعم	نعم	نعم	لا	نعم	نعم	لا
أنثى	26-35 سنة	متزوج/ة	أكثر من 12000 جنيه مصري	ريف	جامعة بكالوريوس /دبلوم	ثانوي	ثانوي	عامل	نعم	لا	لا	لا	نعم	الأهل	نعم	لا	لا	نعم	نعم	لا	لا	لا	لا	لا	لا	لا	نعم	لا	لا	لا	لا	لا	نعم	نعم	نعم	نعم	لا	لا	لا	لا
أنثى	18-25 سنة	متزوج/ة	أقل من 6000 جنيه مصري	مدينة	جامعة بكالوريوس /دبلوم	ابتدائي	ابتدائي	مربية منزل	لا	لا	لا	لا	نعم	الأصدقاء	نعم	نعم	ربما	نعم	نعم	لا	لا	لا	لا	لا	ربما	لا	ربما	ربما	نعم	لا	لا	لا	نعم	نعم	نعم	ربما	نعم	لا	لا	لا
أنثى	18-25 سنة	أعزب\عزباء	6000-12000 جنيه مصري	مدينة	جامعة بكالوريوس /دبلوم	ابتدائي	جامعة بكالوريوس /دبلوم	عامل	نعم	لا	ليس لدي شريك	لا	نعم	المدرسة, الأهل, الطبيب	نعم	نعم	نعم	نعم	نعم	لا	لا	لا	لا	لا	نعم	لا	نعم	لا	لا	لا	لا	نعم	نعم	نعم	نعم	نعم	ربما	ربما	لا	لا
أنثى	18-25 سنة	أعزب\عزباء	أقل من 6000 جنيه مصري	مدينة	جامعة بكالوريوس /دبلوم	ابتدائي	جامعة بكالوريوس /دبلوم	عامل	لا	لا	ليس لدي شريك	لا	نعم	الإنترنت, التلفاز, المدرسة, الأصدقاء, الصحف - الكتب - المجلات	ربما	لا	نعم	لا	نعم	لا	لا	لا	لا	لا	لا	لا	نعم	لا	ربما	لا	لا	لا	نعم	نعم	نعم	ربما	ربما	نعم	لا	لا
أنثى	26-35 سنة	متزوج/ة	أكثر من 12000 جنيه مصري	ريف	جامعة بكالوريوس /دبلوم	شهادات عليا	جامعة بكالوريوس /دبلوم	عامل	نعم	لا	لا	لا	لا	أخرى	نعم	ربما	نعم	نعم	نعم	لا	لا	لا	لا	لا	لا	لا	ربما	لا	لا	لا	لا	لا	نعم	نعم	نعم	نعم	ربما	ربما	ربما	لا
أنثى	18-25 سنة	أعزب\عزباء	أكثر من 12000 جنيه مصري	مدينة	جامعة بكالوريوس /دبلوم	ثانوي	ثانوي	طالب	لا	لا	ليس لدي شريك	لا	نعم	الأصدقاء	ربما	نعم	نعم	ربما	نعم	لا	لا	نعم	لا	ربما	ربما	لا	نعم	ربما	ربما	لا	ربما	لا	نعم	نعم	نعم	نعم	ربما	ربما	لا	لا
أنثى	36-50 سنة	متزوج/ة	أقل من 6000 جنيه مصري	مدينة	جامعة بكالوريوس /دبلوم	ابتدائي	ابتدائي	مربية منزل	لا	لا	لا	لا	نعم	الأهل	نعم	نعم	لا	لا	نعم	لا	لا	ربما	لا	لا	لا	لا	لا	لا	نعم	لا	لا	نعم	نعم	نعم	نعم	نعم	نعم	نعم	لا	لا
أنثى	36-50 سنة	متزوج/ة	6000-12000 جنيه مصري	مدينة	جامعة بكالوريوس /دبلوم	ثانوي	ثانوي	مربية منزل	نعم	لا	لا	لا	نعم	أخرى	نعم	نعم	لا	لا	ربما	لا	لا	لا	لا	لا	نعم	لا	لا	لا	لا	لا	لا	نعم	نعم	نعم	نعم	نعم	نعم	نعم	لا	لا
أنثى	18-25 سنة	متزوج/ة	أقل من 6000 جنيه مصري	ريف	جامعة بكالوريوس /دبلوم	ثانوي	جامعة بكالوريوس /دبلوم	عامل	لا	لا	لا	لا	نعم	التلفاز	نعم	لا	ربما	لا	نعم	ربما	ربما	ربما	ربما	ربما	ربما	لا	لا	لا	ربما	لا	لا	نعم	نعم	نعم	نعم	نعم	نعم	ربما	ربما	لا
ذكر	26-35 سنة	متزوج/ة	6000-12000 جنيه مصري	ريف	جامعة بكالوريوس /دبلوم	ابتدائي	ابتدائي	عامل	لا	لا	لا	لا	نعم	الأهل	ربما	لا	لا	نعم	نعم	لا	لا	لا	لا	لا	ربما	لا	نعم	لا	ربما	لا	لا	ربما	نعم	نعم	نعم	نعم	نعم	نعم	لا	لا
أنثى	18-25 سنة	أعزب\عزباء	أقل من 6000 جنيه مصري	ريف	شهادات عليا	ثانوي	ثانوي	عامل	نعم	لا	لا	لا	نعم	الإنترنت, المدرسة, الأهل	نعم	ربما	نعم	لا	نعم	لا	لا	لا	لا	لا	ربما	لا	نعم	لا	ربما	لا	لا	نعم	نعم	نعم	نعم	نعم	نعم	نعم	لا	لا
أنثى	26-35 سنة	متزوج/ة	أقل من 6000 جنيه مصري	ريف	جامعة بكالوريوس /دبلوم	ثانوي	ثانوي	عاطل عن العمل	لا	نعم	لا	لا	نعم	الإنترنت, التلفاز, المدرسة, الأهل, الأصدقاء, الصحف - الكتب - المجلات, الطبيب	نعم	لا	لا	لا	نعم	لا	لا	لا	لا	لا	لا	لا	نعم	لا	ربما	لا	لا	لا	نعم	نعم	نعم	نعم	نعم	نعم	لا	لا
أنثى	18-25 سنة	أعزب\عزباء	أقل من 6000 جنيه مصري	ريف	جامعة بكالوريوس /دبلوم	جامعة بكالوريوس /دبلوم	ثانوي	عامل	لا	لا	لا	لا	نعم	الإنترنت	نعم	ربما	لا	نعم	نعم	لا	لا	لا	لا	لا	ربما	لا	نعم	لا	لا	لا	لا	لا	نعم	نعم	نعم	نعم	لا	لا	لا	لا
أنثى	26-35 سنة	متزوج/ة	أقل من 6000 جنيه مصري	ريف	جامعة بكالوريوس /دبلوم	ابتدائي	ثانوي	عامل	لا	لا	لا	لا	نعم	الإنترنت	ربما	لا	ربما	ربما	نعم	لا	لا	لا	لا	لا	ربما	لا	ربما	لا	لا	لا	لا	نعم	ربما	نعم	نعم	ربما	لا	لا	ربما	لا
أنثى	18-25 سنة	متزوج/ة	أكثر من 12000 جنيه مصري	ريف	جامعة بكالوريوس /دبلوم	ثانوي	ثانوي	عامل	نعم	لا	لا	لا	نعم	أخرى	نعم	ربما	لا	لا	نعم	لا	لا	لا	لا	لا	لا	لا	ربما	لا	لا	لا	لا	لا	نعم	نعم	نعم	نعم	نعم	نعم	لا	لا
أنثى	36-50 سنة	أعزب\عزباء	أقل من 6000 جنيه مصري	ريف	شهادات عليا	ابتدائي	ابتدائي	عامل	لا	لا	ليس لدي شريك	لا	نعم	أخرى	نعم	نعم	ربما	نعم	ربما	لا	لا	لا	لا	لا	لا	لا	لا	لا	لا	لا	لا	ربما	نعم	نعم	نعم	نعم	ربما	ربما	لا	لا
أنثى	18-25 سنة	أعزب\عزباء	أقل من 6000 جنيه مصري	ريف	جامعة بكالوريوس /دبلوم	جامعة بكالوريوس /دبلوم	ثانوي	عاطل عن العمل	لا	نعم	ليس لدي شريك	لا	نعم	الإنترنت, التلفاز, الأهل	نعم	لا	ربما	ربما	نعم	لا	لا	لا	لا	لا	لا	لا	ربما	لا	لا	لا	لا	لا	نعم	نعم	نعم	نعم	نعم	نعم	لا	لا
أنثى	18-25 سنة	أعزب\عزباء	أقل من 6000 جنيه مصري	ريف	جامعة بكالوريوس /دبلوم	جامعة بكالوريوس /دبلوم	ثانوي	عامل	نعم	لا	ليس لدي شريك	لا	نعم	الإنترنت, المدرسة, الأهل	ربما	ربما	لا	ربما	ربما	لا	لا	لا	لا	لا	لا	ربما	لا	ربما	ربما	لا	لا	ربما	نعم	نعم	نعم	نعم	ربما	ربما	لا	لا
ذكر	51 سنة فأكثر	متزوج/ة	أقل من 6000 جنيه مصري	ريف	ابتدائي	ابتدائي	ابتدائي	عاطل عن العمل	لا	نعم	نعم	نعم	نعم	الأهل	ربما	ربما	ربما	ربما	ربما	لا	لا	لا	لا	لا	لا	لا	ربما	لا	ربما	لا	لا	ربما	نعم	نعم	نعم	نعم	ربما	نعم	لا	لا
أنثى	26-35 سنة	متزوج/ة	أقل من 6000 جنيه مصري	ريف	جامعة بكالوريوس /دبلوم	ابتدائي	ثانوي	مربية منزل	لا	لا	لا	لا	لا	الإنترنت, التلفاز, المدرسة, الأهل, الأصدقاء, أخرى	نعم	لا	ربما	نعم	نعم	لا	لا	لا	لا	لا	ربما	ربما	ربما	لا	لا	لا	لا	ربما	نعم	نعم	نعم	نعم	ربما	ربما	لا	لا
أنثى	18-25 سنة	أعزب\عزباء	أكثر من 12000 جنيه مصري	ريف	جامعة بكالوريوس /دبلوم	ثانوي	ثانوي	عاطل عن العمل	نعم	لا	ليس لدي شريك	لا	نعم	الصحف - الكتب - المجلات	نعم	ربما	ربما	لا	نعم	لا	ربما	ربما	لا	لا	ربما	لا	ربما	لا	ربما	لا	لا	لا	نعم	نعم	نعم	نعم	نعم	نعم	لا	لا
أنثى	18-25 سنة	أعزب\عزباء	أقل من 6000 جنيه مصري	ريف	جامعة بكالوريوس /دبلوم	ثانوي	ثانوي	عامل	لا	لا	ليس لدي شريك	لا	نعم	الإنترنت, التلفاز, المدرسة, الأهل, الأصدقاء	نعم	ربما	لا	ربما	نعم	لا	لا	لا	لا	لا	ربما	لا	ربما	لا	لا	لا	لا	لا	نعم	نعم	نعم	نعم	لا	لا	لا	لا
أنثى	18-25 سنة	أعزب\عزباء	6000-12000 جنيه مصري	ريف	جامعة بكالوريوس /دبلوم	ثانوي	ثانوي	عامل	نعم	لا	لا	لا	نعم	الإنترنت, الأصدقاء, الصحف - الكتب - المجلات	نعم	ربما	لا	ربما	نعم	لا	لا	لا	لا	لا	لا	لا	ربما	لا	ربما	لا	لا	ربما	نعم	نعم	نعم	نعم	ربما	ربما	لا	لا
أنثى	18-25 سنة	متزوج/ة	6000-12000 جنيه مصري	ريف	جامعة بكالوريوس /دبلوم	جامعة بكالوريوس /دبلوم	جامعة بكالوريوس /دبلوم	عامل	نعم	لا	لا	لا	نعم	الإنترنت, المدرسة, الأهل, الطبيب	نعم	نعم	ربما	ربما	نعم	لا	لا	لا	لا	لا	لا	لا	نعم	لا	ربما	لا	لا	ربما	نعم	نعم	نعم	نعم	نعم	ربما	ربما	لا
أنثى	18-25 سنة	أعزب\عزباء	أقل من 6000 جنيه مصري	ريف	جامعة بكالوريوس /دبلوم	ثانوي	ابتدائي	عامل	نعم	لا	ليس لدي شريك	لا	نعم	أخرى	نعم	لا	نعم	لا	نعم	لا	لا	لا	لا	لا	لا	لا	لا	لا	لا	لا	لا	لا	نعم	نعم	نعم	نعم	نعم	نعم	لا	لا
أنثى	36-50 سنة	أعزب\عزباء	6000-12000 جنيه مصري	ريف	شهادات عليا	ابتدائي	ابتدائي	عامل	لا	لا	ليس لدي شريك	لا	نعم	الإنترنت, المدرسة, الأهل	نعم	ربما	ربما	ربما	نعم	لا	لا	لا	لا	لا	ربما	لا	ربما	لا	ربما	لا	ربما	ربما	نعم	نعم	نعم	نعم	نعم	نعم	لا	لا
ذكر	26-35 سنة	أعزب\عزباء	أقل من 6000 جنيه مصري	ريف	شهادات عليا	ابتدائي	ثانوي	عاطل عن العمل	لا	لا	لا	لا	نعم	الإنترنت	ربما	ربما	ربما	ربما	نعم	ربما	ربما	ربما	ربما	ربما	ربما	ربما	ربما	ربما	ربما	نعم	نعم	نعم	نعم	نعم	ربما	نعم	نعم	لا	لا	لا
أنثى	18-25 سنة	أعزب\عزباء	أقل من 6000 جنيه مصري	ريف	جامعة بكالوريوس /دبلوم	ثانوي	شهادات عليا	عاطل عن العمل	لا	لا	ليس لدي شريك	لا	نعم	المدرسة	نعم	ربما	لا	نعم	ربما	لا	لا	لا	لا	لا	ربما	لا	ربما	لا	ربما	لا	لا	ربما	نعم	نعم	نعم	نعم	نعم	نعم	لا	لا
أنثى	18-25 سنة	أعزب\عزباء	6000-12000 جنيه مصري	مدينة	جامعة بكالوريوس /دبلوم	جامعة بكالوريوس /دبلوم	ثانوي	عاطل عن العمل	لا	لا	لا	لا	نعم	التلفاز, الأهل	لا	ربما	لا	لا	نعم	لا	لا	لا	لا	لا	ربما	لا	ربما	لا	ربما	لا	لا	ربما	نعم	نعم	نعم	نعم	نعم	ربما	لا	لا
أنثى	26-35 سنة	متزوج/ة	6000-12000 جنيه مصري	مدينة	ثانوي	ثانوي	ثانوي	مربية منزل	لا	نعم	ليس لدي شريك	لا	نعم	الأهل	نعم	لا	ربما	لا	ربما	لا	لا	لا	لا	لا	لا	لا	لا	لا	ربما	لا	لا	ربما	نعم	نعم	نعم	نعم	نعم	نعم	لا	لا
أنثى	26-35 سنة	متزوج/ة	6000-12000 جنيه مصري	مدينة	جامعة بكالوريوس /دبلوم	ابتدائي	ابتدائي	مربية منزل	لا	لا	لا	لا	نعم	الأصدقاء	نعم	لا	نعم	نعم	نعم	لا	لا	لا	لا	لا	ربما	ربما	نعم	لا	لا	نعم	لا	نعم	نعم	نعم	نعم	نعم	ربما	ربما	لا	لا
أنثى	18-25 سنة	متزوج/ة	أقل من 6000 جنيه مصري	مدينة	ثانوي	ثانوي	ثانوي	مربية منزل	لا	لا	لا	لا	نعم	الإنترنت, المدرسة	نعم	لا	لا	ربما	نعم	ربما	لا	لا	ربما	ربما	ربما	ربما	نعم	ربما	ربما	ربما	ربما	نعم	نعم	نعم	نعم	نعم	نعم	لا	لا	لا
أنثى	18-25 سنة	متزوج/ة	أقل من 6000 جنيه مصري	مدينة	ابتدائي	ابتدائي	ابتدائي	مربية منزل	لا	لا	لا	لا	نعم	الإنترنت, الأهل	نعم	نعم	نعم	لا	نعم	لا	لا	لا	لا	لا	لا	لا	لا	لا	ربما	لا	لا	ربما	نعم	نعم	نعم	نعم	ربما	لا	لا	لا
أنثى	18-25 سنة	أعزب\عزباء	6000-12000 جنيه مصري	مدينة	جامعة بكالوريوس /دبلوم	ثانوي	ثانوي	طالب	لا	لا	ليس لدي شريك	لا	نعم	الإنترنت, التلفاز	نعم	ربما	ربما	لا	نعم	لا	لا	لا	لا	لا	ربما	لا	ربما	لا	لا	لا	لا	ربما	نعم	نعم	نعم	نعم	لا	ربما	لا	لا
أنثى	18-25 سنة	أعزب\عزباء	6000-12000 جنيه مصري	مدينة	جامعة بكالوريوس /دبلوم	ثانوي	ثانوي	طالب	لا	لا	ليس لدي شريك	لا	نعم	الإنترنت, التلفاز, الصحف - الكتب - المجلات	نعم	نعم	نعم	ربما	نعم	لا	لا	لا	لا	لا	نعم	لا	ربما	لا	لا	لا	لا	ربما	نعم	نعم	نعم	نعم	لا	ربما	نعم	ربما
أنثى	18-25 سنة	متزوج/ة	6000-12000 جنيه مصري	مدينة	جامعة بكالوريوس /دبلوم	ابتدائي	ثانوي	مربية منزل	لا	لا	لا	لا	نعم	الإنترنت, المدرسة	نعم	نعم	نعم	نعم	نعم	لا	ربما	نعم	نعم	نعم	ربما	لا	ربما	نعم	لا	ربما	لا	نعم	ربما	لا	لا	لا	لا	لا	نعم	ربما
أنثى	18-25 سنة	أعزب\عزباء	6000-12000 جنيه مصري	مدينة	جامعة بكالوريوس /دبلوم	ابتدائي	ثانوي	طالب	لا	لا	لا	لا	لا	أخرى	ربما	ربما	ربما	ربما	ربما	ربما	ربما	ربما	ربما	ربما	ربما	ربما	ربما	ربما	ربما	ربما	ربما	ربما	ربما	ربما	ربما	ربما	ربما	ربما	ربما	ربما
أنثى	18-25 سنة	أعزب\عزباء	أقل من 6000 جنيه مصري	مدينة	جامعة بكالوريوس /دبلوم	جامعة بكالوريوس /دبلوم	ثانوي	طالب	لا	لا	لا	لا	نعم	الإنترنت	نعم	ربما	ربما	ربما	نعم	لا	لا	ربما	لا	لا	ربما	لا	ربما	ربما	ربما	لا	لا	ربما	نعم	نعم	نعم	نعم	نعم	نعم	لا	لا
أنثى	18-25 سنة	أعزب\عزباء	أقل من 6000 جنيه مصري	مدينة	جامعة بكالوريوس /دبلوم	ثانوي	ثانوي	طالب	نعم	نعم	ليس لدي شريك	لا	نعم	الأهل	نعم	ربما	ربما	ربما	نعم	لا	لا	لا	لا	لا	لا	لا	لا	لا	لا	ربما	لا	ربما	نعم	نعم	نعم	نعم	نعم	نعم	ربما	لا
أنثى	18-25 سنة	متزوج/ة	أقل من 6000 جنيه مصري	مدينة	جامعة بكالوريوس /دبلوم	ابتدائي	جامعة بكالوريوس /دبلوم	مربية منزل	نعم	لا	لا	لا	نعم	الإنترنت, المدرسة, الصحف - الكتب - المجلات	نعم	لا	لا	ربما	لا	لا	لا	لا	لا	لا	لا	لا	ربما	لا	لا	لا	لا	نعم	نعم	نعم	نعم	نعم	نعم	نعم	لا	لا
أنثى	18-25 سنة	أعزب\عزباء	6000-12000 جنيه مصري	ريف	جامعة بكالوريوس /دبلوم	ثانوي	ابتدائي	عامل	نعم	لا	لا	لا	نعم	الإنترنت, التلفاز, المدرسة, الأهل, الأصدقاء, الصحف - الكتب - المجلات, الطبيب, أخرى	نعم	نعم	نعم	نعم	نعم	لا	لا	لا	لا	لا	لا	نعم	نعم	لا	نعم	لا	لا	نعم	نعم	نعم	نعم	نعم	لا	لا	لا	لا
أنثى	18-25 سنة	أعزب\عزباء	أقل من 6000 جنيه مصري	ريف	جامعة بكالوريوس /دبلوم	ابتدائي	ابتدائي	عاطل عن العمل	نعم	لا	ليس لدي شريك	لا	نعم	الإنترنت, الأهل, الأصدقاء	نعم	نعم	ربما	ربما	نعم	لا	لا	لا	لا	نعم	ربما	لا	لا	لا	نعم	لا	لا	نعم	ربما	نعم	نعم	نعم	ربما	نعم	لا	لا
أنثى	18-25 سنة	متزوج/ة	6000-12000 جنيه مصري	مدينة	جامعة بكالوريوس /دبلوم	ثانوي	جامعة بكالوريوس /دبلوم	مربية منزل	لا	نعم	لا	لا	نعم	الطبيب	نعم	لا	ربما	نعم	نعم	لا	لا	لا	لا	لا	ربما	ربما	ربما	ربما	ربما	لا	لا	نعم	نعم	نعم	نعم	نعم	ربما	ربما	لا	لا
أنثى	18-25 سنة	أعزب\عزباء	6000-12000 جنيه مصري	مدينة	جامعة بكالوريوس /دبلوم	ثانوي	ثانوي	طالب	لا	لا	ليس لدي شريك	لا	نعم	الإنترنت, المدرسة, الأهل, الأصدقاء, الطبيب	نعم	نعم	نعم	نعم	نعم	ربما	ربما	ربما	ربما	لا	نعم	ربما	نعم	لا	لا	لا	لا	نعم	نعم	نعم	نعم	ربما	لا	لا	نعم	لا
أنثى	36-50 سنة	متزوج/ة	أقل من 6000 جنيه مصري	مدينة	جامعة بكالوريوس /دبلوم	ابتدائي	ابتدائي	مربية منزل	لا	لا	لا	لا	نعم	الإنترنت, الأهل	نعم	نعم	نعم	نعم	نعم	لا	لا	لا	لا	لا	نعم	نعم	ربما	لا	لا	لا	لا	نعم	نعم	نعم	نعم	نعم	لا	لا	لا	لا
أنثى	18-25 سنة	متزوج/ة	أقل من 6000 جنيه مصري	مدينة	ثانوي	ثانوي	ثانوي	مربية منزل	لا	لا	لا	لا	نعم	المدرسة	لا	ربما	لا	لا	نعم	لا	لا	لا	لا	لا	ربما	لا	ربما	لا	لا	لا	لا	ربما	نعم	نعم	نعم	نعم	نعم	نعم	لا	لا
أنثى	26-35 سنة	متزوج/ة	أقل من 6000 جنيه مصري	ريف	جامعة بكالوريوس /دبلوم	ثانوي	ثانوي	عامل	لا	لا	لا	لا	نعم	الأهل	نعم	نعم	ربما	نعم	نعم	لا	لا	لا	لا	لا	لا	لا	لا	لا	لا	لا	لا	نعم	نعم	نعم	نعم	نعم	ربما	نعم	نعم	لا
أنثى	26-35 سنة	أعزب\عزباء	أكثر من 12000 جنيه مصري	مدينة	جامعة بكالوريوس /دبلوم	ثانوي	جامعة بكالوريوس /دبلوم	عاطل عن العمل	لا	لا	ليس لدي شريك	لا	نعم	الإنترنت, التلفاز, الصحف - الكتب - المجلات	نعم	نعم	نعم	نعم	نعم	لا	لا	لا	لا	لا	نعم	لا	لا	لا	لا	لا	لا	لا	نعم	نعم	نعم	نعم	نعم	نعم	لا	لا
أنثى	18-25 سنة	أعزب\عزباء	6000-12000 جنيه مصري	ريف	جامعة بكالوريوس /دبلوم	ثانوي	جامعة بكالوريوس /دبلوم	طالب	نعم	لا	لا	لا	لا	الإنترنت, الطبيب	نعم	نعم	ربما	ربما	نعم	لا	لا	لا	لا	لا	نعم	لا	نعم	لا	ربما	لا	نعم	ربما	نعم	نعم	نعم	نعم	ربما	ربما	لا	لا
أنثى	18-25 سنة	أعزب\عزباء	6000-12000 جنيه مصري	ريف	جامعة بكالوريوس /دبلوم	ثانوي	ثانوي	طالب	نعم	لا	ليس لدي شريك	لا	نعم	الإنترنت, المدرسة, الصحف - الكتب - المجلات, الطبيب	نعم	نعم	لا	ربما	نعم	لا	لا	لا	لا	لا	لا	لا	نعم	لا	ربما	لا	لا	نعم	نعم	نعم	نعم	نعم	ربما	ربما	لا	لا
ذكر	18-25 سنة	أعزب\عزباء	أقل من 6000 جنيه مصري	مدينة	جامعة بكالوريوس /دبلوم	جامعة بكالوريوس /دبلوم	ثانوي	طالب	لا	لا	ليس لدي شريك	لا	نعم	الإنترنت, الأهل, الأصدقاء	ربما	لا	لا	لا	نعم	لا	لا	لا	لا	لا	لا	لا	نعم	لا	لا	لا	لا	ربما	نعم	نعم	نعم	نعم	ربما	ربما	لا	لا
ذكر	18-25 سنة	أعزب\عزباء	6000-12000 جنيه مصري	مدينة	جامعة بكالوريوس /دبلوم	جامعة بكالوريوس /دبلوم	جامعة بكالوريوس /دبلوم	طالب	لا	لا	ليس لدي شريك	لا	لا	الإنترنت	ربما	ربما	ربما	ربما	ربما	ربما	ربما	ربما	ربما	ربما	ربما	ربما	ربما	ربما	ربما	ربما	ربما	ربما	ربما	ربما	ربما	ربما	ربما	ربما	ربما	ربما
ذكر	18-25 سنة	أعزب\عزباء	أقل من 6000 جنيه مصري	مدينة	جامعة بكالوريوس /دبلوم	ثانوي	جامعة بكالوريوس /دبلوم	طالب	لا	لا	ليس لدي شريك	لا	نعم	الإنترنت	نعم	ربما	ربما	ربما	ربما	ربما	ربما	ربما	ربما	ربما	ربما	ربما	ربما	ربما	ربما	ربما	ربما	ربما	ربما	نعم	نعم	ربما	ربما	ربما	لا	لا
ذكر	18-25 سنة	أعزب\عزباء	أقل من 6000 جنيه مصري	مدينة	جامعة بكالوريوس /دبلوم	جامعة بكالوريوس /دبلوم	جامعة بكالوريوس /دبلوم	طالب	لا	لا	ليس لدي شريك	لا	نعم	الإنترنت, المدرسة, الأصدقاء	ربما	ربما	لا	ربما	نعم	ربما	ربما	لا	لا	لا	ربما	لا	ربما	ربما	ربما	لا	لا	ربما	نعم	نعم	نعم	نعم	لا	ربما	ربما	لا
أنثى	18-25 سنة	أعزب\عزباء	أكثر من 12000 جنيه مصري	مدينة	جامعة بكالوريوس /دبلوم	ثانوي	جامعة بكالوريوس /دبلوم	طالب	لا	لا	ليس لدي شريك	لا	نعم	الإنترنت	نعم	نعم	نعم	نعم	نعم	لا	لا	لا	لا	لا	لا	لا	نعم	لا	نعم	لا	لا	لا	نعم	نعم	نعم	نعم	لا	لا	لا	لا
ذكر	18-25 سنة	أعزب\عزباء	أقل من 6000 جنيه مصري	مدينة	جامعة بكالوريوس /دبلوم	ثانوي	جامعة بكالوريوس /دبلوم	طالب	لا	لا	ليس لدي شريك	لا	نعم	الإنترنت	ربما	ربما	ربما	ربما	ربما	ربما	ربما	ربما	ربما	ربما	ربما	ربما	ربما	ربما	ربما	ربما	ربما	ربما	نعم	نعم	نعم	نعم	لا	لا	ربما	لا
أنثى	18-25 سنة	أعزب\عزباء	6000-12000 جنيه مصري	مدينة	ثانوي	شهادات عليا	جامعة بكالوريوس /دبلوم	طالب	لا	لا	ليس لدي شريك	لا	نعم	الأهل	نعم	لا	لا	لا	نعم	لا	لا	لا	لا	لا	لا	لا	لا	لا	لا	لا	لا	لا	نعم	نعم	نعم	نعم	نعم	نعم	لا	لا
أنثى	18-25 سنة	متزوج/ة	6000-12000 جنيه مصري	ريف	جامعة بكالوريوس /دبلوم	ثانوي	ابتدائي	طالب	نعم	لا	لا	لا	نعم	المدرسة	نعم	نعم	لا	نعم	نعم	لا	لا	لا	لا	لا	ربما	لا	لا	لا	لا	لا	لا	لا	نعم	نعم	نعم	نعم	لا	لا	لا	لا
ذكر	26-35 سنة	متزوج/ة	أقل من 6000 جنيه مصري	مدينة	ثانوي	ثانوي	ثانوي	عامل	لا	لا	لا	لا	نعم	الإنترنت	نعم	ربما	نعم	ربما	نعم	ربما	لا	لا	ربما	ربما	ربما	لا	ربما	لا	ربما	ربما	ربما	ربما	ربما	ربما	ربما	ربما	ربما	ربما	لا	لا
ذكر	18-25 سنة	أعزب\عزباء	أقل من 6000 جنيه مصري	مدينة	ثانوي	ثانوي	جامعة بكالوريوس /دبلوم	عامل	لا	لا	ليس لدي شريك	لا	نعم	الإنترنت, أخرى	نعم	ربما	نعم	ربما	نعم	ربما	ربما	ربما	ربما	ربما	ربما	ربما	ربما	لا	ربما	ربما	ربما	ربما	لا	لا	لا	لا	لا	لا	ربما	لا
ذكر	26-35 سنة	متزوج/ة	6000-12000 جنيه مصري	مدينة	ثانوي	ابتدائي	ابتدائي	عامل	لا	لا	لا	لا	لا	أخرى	ربما	ربما	ربما	ربما	ربما	ربما	ربما	ربما	ربما	ربما	ربما	ربما	ربما	ربما	ربما	ربما	ربما	ربما	ربما	ربما	ربما	ربما	ربما	ربما	لا	ربما
ذكر	18-25 سنة	أعزب\عزباء	6000-12000 جنيه مصري	مدينة	ابتدائي	ابتدائي	ابتدائي	عامل	لا	نعم	ليس لدي شريك	لا	نعم	الأهل	ربما	ربما	نعم	نعم	لا	لا	لا	لا	لا	لا	ربما	لا	ربما	ربما	لا	لا	لا	نعم	نعم	نعم	نعم	نعم	نعم	نعم	لا	لا
ذكر	26-35 سنة	متزوج/ة	6000-12000 جنيه مصري	مدينة	ثانوي	ثانوي	ابتدائي	عامل	لا	لا	لا	لا	نعم	الأصدقاء	نعم	ربما	ربما	نعم	نعم	لا	لا	ربما	ربما	لا	لا	لا	لا	نعم	لا	ربما	لا	نعم	نعم	ربما	نعم	نعم	نعم	نعم	لا	لا
أنثى	36-50 سنة	متزوج/ة	أقل من 6000 جنيه مصري	مدينة	ثانوي	ابتدائي	ابتدائي	مربية منزل	لا	لا	لا	لا	نعم	الأهل	لا	ربما	لا	ربما	نعم	لا	لا	ربما	لا	لا	ربما	لا	ربما	لا	ربما	لا	لا	ربما	نعم	نعم	نعم	نعم	ربما	ربما	لا	لا
ذكر	18-25 سنة	أعزب\عزباء	6000-12000 جنيه مصري	مدينة	جامعة بكالوريوس /دبلوم	ثانوي	ثانوي	عاطل عن العمل	لا	لا	لا	لا	نعم	الأصدقاء	ربما	ربما	نعم	نعم	نعم	لا	ربما	ربما	ربما	نعم	ربما	ربما	ربما	ربما	ربما	لا	ربما	ربما	ربما	ربما	ربما	لا	لا	لا	ربما	لا
ذكر	26-35 سنة	متزوج/ة	أقل من 6000 جنيه مصري	ريف	ثانوي	ابتدائي	ثانوي	عامل	لا	لا	لا	لا	نعم	أخرى	ربما	ربما	ربما	نعم	نعم	ربما	ربما	ربما	ربما	ربما	ربما	ربما	ربما	ربما	ربما	ربما	لا	ربما	نعم	نعم	ربما	نعم	لا	لا	لا	لا
ذكر	26-35 سنة	متزوج/ة	أقل من 6000 جنيه مصري	ريف	ثانوي	ابتدائي	ابتدائي	عامل	لا	لا	نعم	لا	نعم	الإنترنت	ربما	ربما	ربما	ربما	نعم	ربما	لا	لا	لا	لا	ربما	لا	لا	لا	ربما	لا	ربما	لا	نعم	نعم	نعم	نعم	نعم	نعم	لا	لا
أنثى	18-25 سنة	أعزب\عزباء	6000-12000 جنيه مصري	مدينة	جامعة بكالوريوس /دبلوم	شهادات عليا	جامعة بكالوريوس /دبلوم	طالب	نعم	لا	ليس لدي شريك	لا	نعم	الطبيب	نعم	لا	لا	ربما	ربما	لا	لا	لا	لا	لا	لا	لا	لا	لا	لا	لا	لا	لا	نعم	نعم	نعم	نعم	نعم	نعم	لا	لا
ذكر	26-35 سنة	متزوج/ة	أقل من 6000 جنيه مصري	ريف	ابتدائي	ابتدائي	ثانوي	عامل	لا	لا	لا	لا	نعم	الإنترنت	نعم	ربما	لا	لا	نعم	لا	لا	لا	لا	لا	لا	لا	نعم	لا	لا	لا	ربما	ربما	نعم	نعم	نعم	نعم	ربما	ربما	لا	لا
ذكر	18-25 سنة	أعزب\عزباء	أقل من 6000 جنيه مصري	مدينة	ابتدائي	ابتدائي	ابتدائي	عامل	لا	لا	لا	لا	لا	أخرى	ربما	لا	لا	لا	ربما	ربما	ربما	ربما	ربما	ربما	لا	لا	لا	لا	لا	نعم	نعم	ربما	لا	لا	لا	لا	ربما	لا	لا	لا
ذكر	26-35 سنة	متزوج/ة	أقل من 6000 جنيه مصري	ريف	ابتدائي	ابتدائي	ثانوي	عامل	لا	لا	لا	لا	نعم	الإنترنت	نعم	ربما	لا	لا	نعم	لا	لا	لا	نعم	لا	لا	لا	لا	لا	لا	لا	ربما	ربما	نعم	نعم	نعم	نعم	ربما	ربما	لا	لا
أنثى	26-35 سنة	أعزب\عزباء	6000-12000 جنيه مصري	مدينة	شهادات عليا	ثانوي	ابتدائي	عامل	لا	لا	ليس لدي شريك	لا	نعم	الإنترنت, التلفاز, المدرسة, الأهل, الأصدقاء, الصحف - الكتب - المجلات, الطبيب	نعم	لا	نعم	لا	نعم	لا	لا	لا	لا	لا	لا	لا	نعم	لا	نعم	لا	لا	نعم	نعم	نعم	نعم	نعم	لا	لا	نعم	لا
أنثى	18-25 سنة	أعزب\عزباء	أقل من 6000 جنيه مصري	مدينة	جامعة بكالوريوس /دبلوم	ثانوي	ثانوي	طالب	لا	لا	ليس لدي شريك	لا	نعم	أخرى	نعم	لا	لا	نعم	نعم	لا	لا	لا	لا	ربما	ربما	ربما	لا	ربما	لا	لا	نعم	نعم	نعم	نعم	نعم	ربما	ربما	ربما	نعم	لا
أنثى	18-25 سنة	أعزب\عزباء	أقل من 6000 جنيه مصري	ريف	ثانوي	ثانوي	ثانوي	عاطل عن العمل	نعم	لا	لا	نعم	نعم	الأهل	ربما	ربما	لا	نعم	لا	لا	نعم	لا	لا	ربما	ربما	ربما	ربما	نعم	نعم	نعم	نعم	نعم	ربما	ربما	لا	ربما	لا	ربما	لا	لا
أنثى	26-35 سنة	متزوج/ة	أكثر من 12000 جنيه مصري	مدينة	شهادات عليا	ثانوي	جامعة بكالوريوس /دبلوم	عامل	نعم	لا	لا	لا	نعم	الإنترنت, المدرسة, الصحف - الكتب - المجلات	نعم	نعم	ربما	ربما	نعم	لا	لا	لا	لا	لا	لا	لا	لا	لا	لا	لا	لا	لا	نعم	نعم	نعم	نعم	نعم	نعم	لا	لا
أنثى	51 سنة فأكثر	متزوج/ة	أكثر من 12000 جنيه مصري	مدينة	جامعة بكالوريوس /دبلوم	ثانوي	جامعة بكالوريوس /دبلوم	مربية منزل	لا	لا	لا	لا	نعم	الأصدقاء	ربما	نعم	نعم	ربما	نعم	لا	لا	لا	لا	لا	ربما	ربما	لا	لا	ربما	لا	لا	ربما	نعم	نعم	نعم	نعم	لا	لا	ربما	لا
أنثى	18-25 سنة	أعزب\عزباء	6000-12000 جنيه مصري	مدينة	ثانوي	جامعة بكالوريوس /دبلوم	ثانوي	عامل	لا	لا	ليس لدي شريك	لا	نعم	الإنترنت	نعم	نعم	نعم	ربما	نعم	ربما	ربما	ربما	ربما	لا	ربما	لا	ربما	ربما	ربما	لا	لا	ربما	نعم	نعم	نعم	نعم	لا	ربما	ربما	ربما
أنثى	18-25 سنة	أعزب\عزباء	6000-12000 جنيه مصري	مدينة	جامعة بكالوريوس /دبلوم	ثانوي	ثانوي	عامل	نعم	لا	ليس لدي شريك	لا	نعم	المدرسة	نعم	نعم	نعم	ربما	نعم	لا	لا	لا	لا	لا	لا	لا	لا	لا	لا	لا	لا	لا	نعم	نعم	نعم	نعم	نعم	نعم	نعم	لا
أنثى	26-35 سنة	متزوج/ة	أقل من 6000 جنيه مصري	مدينة	ثانوي	ثانوي	ثانوي	مربية منزل	لا	لا	لا	لا	نعم	الأصدقاء	نعم	نعم	ربما	نعم	نعم	لا	لا	لا	لا	لا	ربما	لا	نعم	لا	ربما	لا	لا	ربما	ربما	نعم	ربما	ربما	ربما	ربما	ربما	لا
أنثى	36-50 سنة	متزوج/ة	أقل من 6000 جنيه مصري	ريف	ثانوي	ابتدائي	ابتدائي	مربية منزل	لا	لا	ليس لدي شريك	لا	نعم	الإنترنت	ربما	ربما	نعم	نعم	نعم	لا	لا	لا	لا	ربما	نعم	لا	لا	لا	لا	ربما	لا	لا	نعم	نعم	نعم	نعم	ربما	ربما	لا	لا
أنثى	51 سنة فأكثر	متزوج/ة	أقل من 6000 جنيه مصري	ريف	جامعة بكالوريوس /دبلوم	ابتدائي	ابتدائي	عامل	لا	لا	لا	لا	نعم	الإنترنت	نعم	لا	ربما	نعم	نعم	لا	لا	لا	لا	لا	لا	لا	نعم	لا	لا	لا	لا	لا	نعم	نعم	نعم	نعم	ربما	ربما	ربما	لا
أنثى	36-50 سنة	متزوج/ة	أقل من 6000 جنيه مصري	ريف	جامعة بكالوريوس /دبلوم	ابتدائي	ثانوي	عامل	لا	لا	لا	لا	لا	أخرى	ربما	ربما	ربما	ربما	نعم	ربما	ربما	ربما	ربما	ربما	ربما	ربما	ربما	ربما	ربما	ربما	ربما	ربما	ربما	ربما	ربما	ربما	ربما	ربما	ربما	ربما
أنثى	18-25 سنة	متزوج/ة	6000-12000 جنيه مصري	ريف	جامعة بكالوريوس /دبلوم	جامعة بكالوريوس /دبلوم	جامعة بكالوريوس /دبلوم	طالب	نعم	لا	لا	لا	نعم	الأصدقاء	نعم	لا	لا	لا	لا	لا	لا	لا	لا	لا	لا	لا	نعم	لا	لا	لا	لا	ربما	نعم	نعم	نعم	نعم	لا	نعم	لا	لا
أنثى	36-50 سنة	متزوج/ة	أقل من 6000 جنيه مصري	مدينة	جامعة بكالوريوس /دبلوم	جامعة بكالوريوس /دبلوم	ثانوي	مربية منزل	لا	لا	لا	لا	نعم	الإنترنت	نعم	ربما	نعم	ربما	نعم	لا	لا	لا	لا	لا	ربما	لا	ربما	لا	ربما	لا	لا	نعم	ربما	نعم	نعم	نعم	ربما	ربما	ربما	لا
أنثى	51 سنة فأكثر	متزوج/ة	أقل من 6000 جنيه مصري	مدينة	جامعة بكالوريوس /دبلوم	ابتدائي	ابتدائي	عامل	لا	لا	لا	لا	نعم	أخرى	نعم	ربما	ربما	ربما	نعم	ربما	لا	لا	لا	لا	ربما	ربما	لا	لا	ربما	لا	لا	لا	نعم	نعم	نعم	نعم	ربما	ربما	ربما	لا
أنثى	18-25 سنة	أعزب\عزباء	أقل من 6000 جنيه مصري	ريف	جامعة بكالوريوس /دبلوم	ثانوي	ثانوي	عاطل عن العمل	نعم	لا	ليس لدي شريك	لا	نعم	الإنترنت, التلفاز, المدرسة, الأهل, الأصدقاء, الصحف - الكتب - المجلات, الطبيب, أخرى	ربما	لا	ربما	نعم	نعم	لا	لا	لا	لا	لا	لا	لا	نعم	لا	لا	لا	لا	ربما	نعم	نعم	نعم	نعم	ربما	ربما	لا	لا
أنثى	18-25 سنة	متزوج/ة	6000-12000 جنيه مصري	ريف	جامعة بكالوريوس /دبلوم	ثانوي	ثانوي	عاطل عن العمل	نعم	لا	لا	لا	نعم	الإنترنت	نعم	ربما	لا	لا	نعم	لا	لا	لا	لا	لا	لا	لا	ربما	لا	لا	لا	لا	ربما	نعم	نعم	نعم	نعم	نعم	لا	لا	لا
ذكر	51 سنة فأكثر	متزوج/ة	6000-12000 جنيه مصري	مدينة	جامعة بكالوريوس /دبلوم	ابتدائي	ابتدائي	متقاعد	لا	لا	لا	لا	نعم	الإنترنت	نعم	لا	نعم	لا	لا	لا	لا	لا	لا	لا	لا	لا	لا	لا	لا	لا	لا	لا	نعم	نعم	نعم	نعم	لا	لا	نعم	لا
أنثى	18-25 سنة	أعزب\عزباء	أقل من 6000 جنيه مصري	مدينة	جامعة بكالوريوس /دبلوم	ثانوي	جامعة بكالوريوس /دبلوم	عامل	نعم	لا	ليس لدي شريك	لا	نعم	الأهل, الأصدقاء, أخرى	نعم	ربما	لا	نعم	نعم	لا	لا	لا	لا	لا	ربما	لا	لا	لا	لا	لا	لا	نعم	نعم	نعم	نعم	نعم	نعم	نعم	لا	لا
أنثى	26-35 سنة	متزوج/ة	6000-12000 جنيه مصري	مدينة	جامعة بكالوريوس /دبلوم	جامعة بكالوريوس /دبلوم	ثانوي	مربية منزل	لا	لا	لا	لا	نعم	الإنترنت, التلفاز, المدرسة	نعم	نعم	نعم	نعم	نعم	لا	لا	لا	لا	لا	لا	لا	لا	لا	ربما	لا	لا	ربما	نعم	نعم	نعم	نعم	ربما	نعم	نعم	لا
أنثى	36-50 سنة	متزوج/ة	6000-12000 جنيه مصري	مدينة	جامعة بكالوريوس /دبلوم	ابتدائي	ابتدائي	عامل	لا	لا	لا	لا	نعم	الإنترنت, التلفاز, المدرسة, الأهل, الأصدقاء, الصحف - الكتب - المجلات, الطبيب, أخرى	ربما	ربما	نعم	ربما	نعم	ربما	لا	لا	لا	لا	ربما	ربما	ربما	ربما	لا	ربما	لا	ربما	نعم	نعم	نعم	نعم	ربما	ربما	ربما	لا
أنثى	51 سنة فأكثر	متزوج/ة	أقل من 6000 جنيه مصري	ريف	ثانوي	جامعة بكالوريوس /دبلوم	ثانوي	مربية منزل	لا	لا	لا	لا	نعم	الإنترنت	نعم	نعم	نعم	لا	نعم	ربما	لا	ربما	ربما	ربما	ربما	لا	لا	لا	نعم	لا	لا	نعم	لا	نعم	ربما	نعم	لا	لا	ربما	لا
ذكر	36-50 سنة	متزوج/ة	6000-12000 جنيه مصري	مدينة	شهادات عليا	ابتدائي	ابتدائي	عامل	نعم	لا	لا	لا	نعم	الصحف - الكتب - المجلات	نعم	نعم	نعم	ربما	نعم	لا	لا	لا	لا	لا	ربما	لا	ربما	لا	لا	لا	لا	نعم	نعم	نعم	نعم	نعم	ربما	ربما	لا	لا
ذكر	36-50 سنة	متزوج/ة	6000-12000 جنيه مصري	ريف	جامعة بكالوريوس /دبلوم	ثانوي	ابتدائي	عامل	نعم	لا	لا	لا	نعم	الأهل	نعم	ربما	نعم	ربما	نعم	لا	لا	لا	لا	ربما	ربما	لا	ربما	لا	لا	لا	لا	ربما	ربما	نعم	نعم	نعم	لا	ربما	ربما	لا
أنثى	18-25 سنة	أعزب\عزباء	6000-12000 جنيه مصري	مدينة	جامعة بكالوريوس /دبلوم	ثانوي	جامعة بكالوريوس /دبلوم	طالب	نعم	لا	ليس لدي شريك	لا	نعم	الإنترنت, الصحف - الكتب - المجلات, أخرى	نعم	نعم	لا	نعم	نعم	لا	لا	لا	لا	لا	نعم	لا	نعم	لا	ربما	لا	لا	لا	نعم	نعم	نعم	نعم	ربما	ربما	لا	لا
أنثى	18-25 سنة	متزوج/ة	6000-12000 جنيه مصري	مدينة	جامعة بكالوريوس /دبلوم	ابتدائي	ابتدائي	طالب	لا	لا	لا	لا	نعم	الأهل	ربما	ربما	ربما	ربما	نعم	ربما	ربما	لا	لا	لا	ربما	ربما	نعم	ربما	لا	ربما	لا	نعم	نعم	نعم	نعم	نعم	ربما	ربما	نعم	لا
أنثى	18-25 سنة	أعزب\عزباء	أقل من 6000 جنيه مصري	مدينة	جامعة بكالوريوس /دبلوم	جامعة بكالوريوس /دبلوم	جامعة بكالوريوس /دبلوم	طالب	نعم	لا	ليس لدي شريك	لا	نعم	التلفاز, المدرسة, الأهل, الأصدقاء	نعم	نعم	نعم	ربما	نعم	ربما	لا	لا	لا	لا	ربما	ربما	لا	لا	لا	لا	لا	لا	نعم	نعم	نعم	نعم	ربما	ربما	ربما	لا
أنثى	18-25 سنة	متزوج/ة	أقل من 6000 جنيه مصري	مدينة	جامعة بكالوريوس /دبلوم	ابتدائي	ثانوي	عامل	لا	لا	لا	لا	نعم	الأهل	نعم	لا	نعم	نعم	نعم	لا	لا	لا	لا	لا	لا	لا	نعم	لا	نعم	لا	لا	ربما	نعم	نعم	نعم	نعم	نعم	نعم	لا	لا
أنثى	18-25 سنة	متزوج/ة	6000-12000 جنيه مصري	ريف	ثانوي	ابتدائي	ابتدائي	مربية منزل	لا	نعم	لا	لا	نعم	أخرى	ربما	ربما	ربما	لا	نعم	لا	لا	لا	لا	لا	لا	لا	لا	لا	لا	ربما	لا	ربما	نعم	نعم	نعم	نعم	نعم	نعم	لا	لا
أنثى	18-25 سنة	متزوج/ة	6000-12000 جنيه مصري	مدينة	ثانوي	ابتدائي	ابتدائي	مربية منزل	لا	لا	لا	لا	نعم	الأهل	نعم	ربما	لا	ربما	ربما	ربما	لا	لا	لا	ربما	ربما	لا	ربما	ربما	ربما	لا	ربما	لا	نعم	نعم	نعم	نعم	نعم	نعم	لا	لا
أنثى	18-25 سنة	متزوج/ة	أقل من 6000 جنيه مصري	مدينة	جامعة بكالوريوس /دبلوم	شهادات عليا	ثانوي	مربية منزل	لا	لا	لا	لا	نعم	الإنترنت, المدرسة, الأهل, الأصدقاء, الطبيب, أخرى	ربما	لا	ربما	لا	نعم	لا	لا	لا	لا	لا	لا	لا	لا	لا	لا	لا	لا	لا	نعم	نعم	نعم	نعم	ربما	لا	لا	لا
أنثى	18-25 سنة	أعزب\عزباء	6000-12000 جنيه مصري	مدينة	جامعة بكالوريوس /دبلوم	جامعة بكالوريوس /دبلوم	جامعة بكالوريوس /دبلوم	عاطل عن العمل	نعم	لا	ليس لدي شريك	لا	نعم	الأهل, الأصدقاء, الطبيب, أخرى	نعم	ربما	ربما	لا	ربما	لا	لا	لا	لا	لا	لا	لا	ربما	ربما	لا	لا	لا	نعم	نعم	نعم	نعم	نعم	ربما	ربما	لا	لا
أنثى	18-25 سنة	متزوج/ة	أقل من 6000 جنيه مصري	مدينة	ثانوي	جامعة بكالوريوس /دبلوم	ابتدائي	مربية منزل	لا	لا	لا	لا	نعم	الأهل	نعم	ربما	لا	ربما	نعم	ربما	ربما	ربما	ربما	ربما	ربما	ربما	ربما	ربما	ربما	ربما	ربما	ربما	نعم	نعم	نعم	نعم	نعم	نعم	لا	لا
أنثى	26-35 سنة	متزوج/ة	أقل من 6000 جنيه مصري	مدينة	جامعة بكالوريوس /دبلوم	جامعة بكالوريوس /دبلوم	جامعة بكالوريوس /دبلوم	مربية منزل	نعم	لا	لا	لا	نعم	الإنترنت, المدرسة, الأهل, الأصدقاء	نعم	لا	لا	لا	نعم	لا	لا	لا	لا	لا	لا	لا	لا	لا	لا	لا	لا	لا	نعم	نعم	نعم	نعم	نعم	ربما	لا	لا
أنثى	26-35 سنة	متزوج/ة	أقل من 6000 جنيه مصري	مدينة	جامعة بكالوريوس /دبلوم	جامعة بكالوريوس /دبلوم	ثانوي	مربية منزل	لا	لا	لا	لا	نعم	الأصدقاء	نعم	لا	ربما	ربما	نعم	لا	لا	لا	لا	لا	ربما	لا	لا	لا	ربما	ربما	لا	ربما	ربما	ربما	ربما	ربما	ربما	ربما	لا	لا
أنثى	51 سنة فأكثر	أعزب\عزباء	أقل من 6000 جنيه مصري	مدينة	جامعة بكالوريوس /دبلوم	ابتدائي	ابتدائي	عامل	نعم	لا	ليس لدي شريك	لا	نعم	الأهل	نعم	ربما	نعم	ربما	نعم	لا	لا	لا	لا	لا	لا	لا	ربما	ربما	ربما	لا	لا	ربما	ربما	نعم	نعم	نعم	نعم	لا	ربما	لا
ذكر	36-50 سنة	متزوج/ة	6000-12000 جنيه مصري	ريف	جامعة بكالوريوس /دبلوم	ثانوي	ثانوي	عامل	نعم	لا	لا	لا	نعم	المدرسة	نعم	لا	ربما	لا	نعم	لا	لا	لا	لا	لا	لا	لا	لا	لا	لا	لا	لا	ربما	نعم	نعم	نعم	نعم	نعم	نعم	لا	لا
ذكر	36-50 سنة	متزوج/ة	6000-12000 جنيه مصري	ريف	جامعة بكالوريوس /دبلوم	ثانوي	ثانوي	عامل	نعم	لا	لا	لا	نعم	الإنترنت	نعم	ربما	لا	ربما	نعم	نعم	لا	لا	نعم	نعم	نعم	لا	ربما	ربما	ربما	ربما	لا	نعم	نعم	نعم	نعم	نعم	لا	لا	نعم	لا
أنثى	36-50 سنة	متزوج/ة	6000-12000 جنيه مصري	مدينة	جامعة بكالوريوس /دبلوم	ثانوي	ابتدائي	عامل	نعم	لا	لا	لا	نعم	الإنترنت, التلفاز, الأصدقاء	نعم	لا	ربما	ربما	نعم	لا	لا	لا	لا	لا	ربما	لا	لا	لا	لا	لا	لا	ربما	نعم	نعم	نعم	نعم	ربما	ربما	لا	لا
ذكر	36-50 سنة	متزوج/ة	أقل من 6000 جنيه مصري	مدينة	جامعة بكالوريوس /دبلوم	ثانوي	ابتدائي	عامل	لا	لا	لا	لا	نعم	الإنترنت	نعم	ربما	ربما	نعم	ربما	لا	لا	ربما	لا	ربما	ربما	لا	ربما	لا	ربما	ربما	ربما	ربما	نعم	نعم	نعم	نعم	ربما	ربما	لا	لا
أنثى	26-35 سنة	متزوج/ة	6000-12000 جنيه مصري	ريف	جامعة بكالوريوس /دبلوم	ثانوي	ثانوي	عامل	نعم	لا	لا	لا	نعم	الصحف - الكتب - المجلات	نعم	نعم	ربما	ربما	ربما	لا	لا	لا	لا	لا	ربما	لا	نعم	لا	لا	لا	لا	ربما	نعم	نعم	نعم	نعم	نعم	لا	ربما	لا
ذكر	36-50 سنة	متزوج/ة	6000-12000 جنيه مصري	مدينة	شهادات عليا	ثانوي	ابتدائي	عامل	نعم	لا	لا	لا	نعم	الصحف - الكتب - المجلات	نعم	نعم	نعم	نعم	نعم	لا	لا	لا	لا	لا	نعم	لا	نعم	لا	لا	لا	لا	لا	نعم	نعم	نعم	نعم	لا	لا	لا	لا
أنثى	26-35 سنة	متزوج/ة	6000-12000 جنيه مصري	ريف	جامعة بكالوريوس /دبلوم	ثانوي	ثانوي	عامل	نعم	نعم	لا	لا	نعم	الإنترنت	نعم	نعم	نعم	لا	نعم	لا	لا	لا	لا	لا	نعم	لا	نعم	لا	لا	لا	لا	نعم	نعم	نعم	نعم	نعم	نعم	نعم	لا	لا
أنثى	18-25 سنة	أعزب\عزباء	6000-12000 جنيه مصري	مدينة	شهادات عليا	جامعة بكالوريوس /دبلوم	جامعة بكالوريوس /دبلوم	طالب	لا	لا	ليس لدي شريك	لا	نعم	الإنترنت, التلفاز, المدرسة	ربما	نعم	ربما	نعم	نعم	لا	لا	لا	لا	لا	لا	لا	نعم	لا	لا	لا	لا	نعم	نعم	نعم	نعم	نعم	لا	لا	نعم	لا
ذكر	26-35 سنة	متزوج/ة	6000-12000 جنيه مصري	ريف	ثانوي	ثانوي	ثانوي	عامل	لا	لا	لا	لا	نعم	الإنترنت	ربما	لا	نعم	ربما	نعم	لا	لا	لا	لا	لا	لا	لا	لا	لا	ربما	لا	لا	ربما	نعم	نعم	نعم	نعم	لا	لا	لا	لا
أنثى	36-50 سنة	متزوج/ة	6000-12000 جنيه مصري	مدينة	جامعة بكالوريوس /دبلوم	جامعة بكالوريوس /دبلوم	جامعة بكالوريوس /دبلوم	عامل	نعم	لا	لا	لا	نعم	الإنترنت	نعم	لا	نعم	لا	نعم	لا	لا	لا	لا	لا	ربما	لا	نعم	لا	ربما	لا	لا	لا	نعم	نعم	نعم	نعم	ربما	ربما	ربما	لا
أنثى	36-50 سنة	متزوج/ة	6000-12000 جنيه مصري	ريف	جامعة بكالوريوس /دبلوم	شهادات عليا	ثانوي	عامل	نعم	لا	لا	لا	نعم	الإنترنت, الصحف - الكتب - المجلات	نعم	نعم	نعم	نعم	نعم	لا	لا	لا	لا	لا	نعم	ربما	ربما	لا	لا	لا	لا	ربما	نعم	نعم	نعم	نعم	ربما	ربما	لا	لا
أنثى	36-50 سنة	متزوج/ة	6000-12000 جنيه مصري	مدينة	جامعة بكالوريوس /دبلوم	ابتدائي	ابتدائي	عامل	نعم	لا	لا	لا	نعم	أخرى	نعم	نعم	ربما	ربما	نعم	لا	لا	لا	لا	لا	ربما	لا	لا	لا	ربما	ربما	لا	لا	نعم	نعم	نعم	نعم	ربما	ربما	لا	لا
أنثى	36-50 سنة	متزوج/ة	أقل من 6000 جنيه مصري	مدينة	جامعة بكالوريوس /دبلوم	ثانوي	ثانوي	مربية منزل	لا	لا	لا	لا	نعم	الإنترنت	ربما	نعم	لا	نعم	نعم	لا	لا	لا	لا	ربما	نعم	لا	لا	لا	لا	لا	لا	ربما	نعم	نعم	نعم	نعم	نعم	نعم	لا	لا
أنثى	18-25 سنة	أعزب\عزباء	أكثر من 12000 جنيه مصري	مدينة	جامعة بكالوريوس /دبلوم	جامعة بكالوريوس /دبلوم	ثانوي	طالب	لا	لا	ليس لدي شريك	لا	نعم	أخرى	نعم	ربما	ربما	لا	نعم	لا	لا	لا	لا	لا	ربما	لا	لا	لا	ربما	لا	لا	ربما	نعم	نعم	نعم	نعم	لا	لا	ربما	لا
أنثى	26-35 سنة	متزوج/ة	6000-12000 جنيه مصري	مدينة	جامعة بكالوريوس /دبلوم	جامعة بكالوريوس /دبلوم	ثانوي	مربية منزل	نعم	لا	لا	لا	نعم	الإنترنت, المدرسة, الأهل, الأصدقاء, الصحف - الكتب - المجلات	نعم	لا	نعم	لا	نعم	لا	لا	لا	لا	ربما	نعم	لا	لا	لا	ربما	ربما	لا	نعم	نعم	نعم	نعم	نعم	لا	ربما	لا	لا
أنثى	18-25 سنة	أعزب\عزباء	أقل من 6000 جنيه مصري	مدينة	جامعة بكالوريوس /دبلوم	ثانوي	ثانوي	طالب	لا	لا	ليس لدي شريك	لا	نعم	الإنترنت, المدرسة, الأهل, الأصدقاء, الطبيب	نعم	نعم	لا	ربما	نعم	لا	ربما	لا	لا	ربما	نعم	لا	لا	ربما	نعم	لا	لا	ربما	نعم	نعم	نعم	نعم	نعم	ربما	ربما	لا
أنثى	26-35 سنة	متزوج/ة	أقل من 6000 جنيه مصري	ريف	ثانوي	جامعة بكالوريوس /دبلوم	ثانوي	عامل	لا	لا	لا	لا	نعم	المدرسة	نعم	لا	نعم	لا	نعم	لا	لا	لا	لا	لا	ربما	لا	ربما	لا	ربما	لا	لا	ربما	نعم	نعم	نعم	نعم	ربما	ربما	لا	لا
أنثى	26-35 سنة	متزوج/ة	6000-12000 جنيه مصري	مدينة	جامعة بكالوريوس /دبلوم	جامعة بكالوريوس /دبلوم	جامعة بكالوريوس /دبلوم	مربية منزل	لا	لا	لا	لا	نعم	الإنترنت, التلفاز, المدرسة, الأهل, الأصدقاء	نعم	ربما	لا	ربما	نعم	لا	لا	لا	ربما	لا	ربما	لا	ربما	لا	لا	لا	لا	لا	نعم	نعم	نعم	نعم	ربما	ربما	لا	لا
أنثى	36-50 سنة	متزوج/ة	أقل من 6000 جنيه مصري	مدينة	ثانوي	ثانوي	جامعة بكالوريوس /دبلوم	عامل	لا	لا	لا	لا	نعم	الأصدقاء	ربما	ربما	نعم	نعم	نعم	لا	لا	لا	لا	لا	ربما	لا	ربما	لا	ربما	ربما	لا	ربما	نعم	نعم	نعم	نعم	لا	لا	ربما	لا
أنثى	18-25 سنة	أعزب\عزباء	6000-12000 جنيه مصري	مدينة	جامعة بكالوريوس /دبلوم	جامعة بكالوريوس /دبلوم	جامعة بكالوريوس /دبلوم	عامل	لا	لا	ليس لدي شريك	لا	نعم	أخرى	نعم	ربما	ربما	ربما	ربما	لا	لا	لا	لا	لا	ربما	لا	ربما	ربما	لا	لا	ربما	ربما	نعم	نعم	ربما	نعم	نعم	نعم	ربما	لا
أنثى	26-35 سنة	متزوج/ة	6000-12000 جنيه مصري	مدينة	جامعة بكالوريوس /دبلوم	ثانوي	جامعة بكالوريوس /دبلوم	مربية منزل	لا	لا	لا	لا	نعم	الأهل	نعم	نعم	ربما	ربما	نعم	لا	لا	ربما	لا	لا	نعم	لا	لا	لا	لا	لا	نعم	لا	نعم	نعم	نعم	نعم	ربما	ربما	ربما	لا
أنثى	18-25 سنة	أعزب\عزباء	أقل من 6000 جنيه مصري	مدينة	ثانوي	جامعة بكالوريوس /دبلوم	ابتدائي	طالب	لا	لا	لا	لا	نعم	الإنترنت	نعم	ربما	ربما	ربما	نعم	لا	لا	ربما	لا	ربما	ربما	ربما	نعم	لا	ربما	لا	لا	لا	نعم	نعم	نعم	نعم	ربما	ربما	لا	لا
أنثى	18-25 سنة	أعزب\عزباء	أكثر من 12000 جنيه مصري	ريف	جامعة بكالوريوس /دبلوم	جامعة بكالوريوس /دبلوم	ثانوي	عامل	نعم	لا	ليس لدي شريك	لا	نعم	الإنترنت, الطبيب, أخرى	نعم	لا	لا	نعم	نعم	لا	لا	لا	لا	لا	لا	لا	لا	لا	لا	لا	لا	نعم	نعم	نعم	نعم	نعم	نعم	نعم	لا	لا
أنثى	26-35 سنة	متزوج/ة	أقل من 6000 جنيه مصري	مدينة	ثانوي	ثانوي	ابتدائي	مربية منزل	لا	لا	لا	لا	نعم	الإنترنت	نعم	لا	ربما	ربما	نعم	لا	لا	لا	لا	نعم	نعم	لا	لا	ربما	نعم	ربما	لا	نعم	ربما	ربما	ربما	ربما	ربما	ربما	ربما	لا
أنثى	36-50 سنة	متزوج/ة	أقل من 6000 جنيه مصري	مدينة	جامعة بكالوريوس /دبلوم	ابتدائي	ابتدائي	مربية منزل	لا	لا	لا	لا	نعم	الإنترنت, التلفاز, الأهل, الأصدقاء, الصحف - الكتب - المجلات, الطبيب	نعم	لا	نعم	ربما	نعم	لا	لا	لا	لا	لا	نعم	نعم	ربما	ربما	لا	ربما	لا	لا	ربما	نعم	ربما	ربما	لا	لا	لا	لا
أنثى	18-25 سنة	أعزب\عزباء	أقل من 6000 جنيه مصري	مدينة	جامعة بكالوريوس /دبلوم	جامعة بكالوريوس /دبلوم	جامعة بكالوريوس /دبلوم	عاطل عن العمل	نعم	لا	لا	لا	نعم	الإنترنت, الأهل, الأصدقاء, الطبيب	نعم	نعم	نعم	نعم	نعم	لا	لا	لا	لا	لا	نعم	لا	لا	لا	ربما	لا	لا	ربما	نعم	نعم	نعم	نعم	نعم	نعم	لا	لا
ذكر	26-35 سنة	أعزب\عزباء	أكثر من 12000 جنيه مصري	مدينة	شهادات عليا	ثانوي	جامعة بكالوريوس /دبلوم	عامل	لا	لا	لا	لا	نعم	الإنترنت, التلفاز, المدرسة, الأهل, الأصدقاء, الصحف - الكتب - المجلات, أخرى	لا	لا	لا	نعم	نعم	لا	لا	لا	لا	لا	لا	لا	نعم	لا	لا	لا	لا	ربما	ربما	نعم	نعم	نعم	ربما	ربما	لا	لا
أنثى	18-25 سنة	أعزب\عزباء	أكثر من 12000 جنيه مصري	ريف	جامعة بكالوريوس /دبلوم	ثانوي	ثانوي	طالب	نعم	لا	ليس لدي شريك	لا	نعم	الطبيب	نعم	نعم	لا	لا	نعم	لا	لا	لا	لا	لا	لا	لا	لا	لا	نعم	لا	لا	ربما	نعم	نعم	نعم	نعم	نعم	نعم	لا	لا
ذكر	26-35 سنة	أعزب\عزباء	6000-12000 جنيه مصري	مدينة	جامعة بكالوريوس /دبلوم	ابتدائي	ابتدائي	عامل	لا	لا	لا	لا	نعم	الإنترنت	ربما	ربما	ربما	ربما	ربما	ربما	ربما	ربما	ربما	ربما	ربما	ربما	ربما	ربما	ربما	ربما	ربما	ربما	ربما	ربما	ربما	ربما	ربما	ربما	ربما	ربما
أنثى	18-25 سنة	أعزب\عزباء	أكثر من 12000 جنيه مصري	مدينة	جامعة بكالوريوس /دبلوم	شهادات عليا	شهادات عليا	طالب	نعم	لا	ليس لدي شريك	لا	نعم	الإنترنت, التلفاز, المدرسة, الصحف - الكتب - المجلات, الطبيب	نعم	نعم	نعم	لا	نعم	لا	لا	لا	لا	لا	نعم	لا	لا	لا	لا	لا	لا	ربما	نعم	نعم	نعم	نعم	لا	لا	ربما	لا
ذكر	18-25 سنة	أعزب\عزباء	أقل من 6000 جنيه مصري	ريف	جامعة بكالوريوس /دبلوم	شهادات عليا	جامعة بكالوريوس /دبلوم	طالب	نعم	لا	لا	لا	نعم	الإنترنت, الأصدقاء, الطبيب	نعم	نعم	ربما	نعم	نعم	لا	لا	لا	لا	لا	نعم	لا	ربما	لا	لا	لا	لا	نعم	نعم	نعم	نعم	نعم	نعم	نعم	لا	لا
ذكر	18-25 سنة	أعزب\عزباء	أكثر من 12000 جنيه مصري	ريف	ثانوي	شهادات عليا	جامعة بكالوريوس /دبلوم	عامل	لا	لا	ليس لدي شريك	لا	نعم	الأصدقاء	نعم	ربما	لا	ربما	نعم	ربما	ربما	ربما	ربما	ربما	ربما	ربما	ربما	ربما	ربما	ربما	ربما	ربما	نعم	نعم	نعم	نعم	لا	لا	نعم	لا
ذكر	18-25 سنة	أعزب\عزباء	6000-12000 جنيه مصري	مدينة	جامعة بكالوريوس /دبلوم	جامعة بكالوريوس /دبلوم	جامعة بكالوريوس /دبلوم	طالب	نعم	لا	ليس لدي شريك	لا	لا	الصحف - الكتب - المجلات, الطبيب, أخرى	نعم	نعم	نعم	نعم	لا	لا	لا	لا	لا	لا	لا	لا	نعم	لا	لا	لا	لا	لا	نعم	لا	لا	نعم	لا	نعم	لا	لا
ذكر	18-25 سنة	أعزب\عزباء	6000-12000 جنيه مصري	مدينة	جامعة بكالوريوس /دبلوم	جامعة بكالوريوس /دبلوم	ثانوي	طالب	نعم	لا	ليس لدي شريك	لا	نعم	الإنترنت, الأهل, الصحف - الكتب - المجلات, الطبيب	نعم	نعم	لا	نعم	ربما	لا	لا	لا	لا	لا	لا	لا	ربما	لا	لا	لا	لا	ربما	نعم	نعم	نعم	نعم	لا	لا	لا	لا
ذكر	26-35 سنة	متزوج/ة	6000-12000 جنيه مصري	ريف	جامعة بكالوريوس /دبلوم	ثانوي	ثانوي	عامل	لا	لا	لا	لا	نعم	الأهل	نعم	نعم	نعم	ربما	نعم	لا	لا	لا	لا	ربما	لا	لا	ربما	لا	ربما	لا	لا	نعم	نعم	نعم	نعم	نعم	نعم	نعم	لا	لا
ذكر	26-35 سنة	أعزب\عزباء	أقل من 6000 جنيه مصري	مدينة	ثانوي	ثانوي	ثانوي	عامل	لا	لا	لا	لا	نعم	الإنترنت, أخرى	ربما	لا	لا	ربما	نعم	لا	لا	لا	لا	لا	ربما	لا	ربما	لا	لا	لا	لا	ربما	نعم	نعم	نعم	نعم	ربما	ربما	لا	لا
أنثى	36-50 سنة	متزوج/ة	6000-12000 جنيه مصري	ريف	جامعة بكالوريوس /دبلوم	جامعة بكالوريوس /دبلوم	جامعة بكالوريوس /دبلوم	عامل	لا	لا	لا	لا	نعم	الصحف - الكتب - المجلات	نعم	نعم	لا	نعم	نعم	لا	لا	لا	لا	لا	نعم	لا	لا	لا	لا	لا	لا	ربما	نعم	نعم	نعم	نعم	نعم	نعم	لا	لا
ذكر	36-50 سنة	متزوج/ة	6000-12000 جنيه مصري	ريف	جامعة بكالوريوس /دبلوم	جامعة بكالوريوس /دبلوم	ثانوي	عامل	لا	لا	لا	لا	نعم	الأهل	ربما	ربما	نعم	ربما	نعم	لا	لا	لا	لا	لا	لا	لا	ربما	لا	لا	لا	لا	ربما	نعم	نعم	نعم	لا	لا	لا	نعم	لا
أنثى	26-35 سنة	متزوج/ة	6000-12000 جنيه مصري	مدينة	شهادات عليا	ثانوي	ابتدائي	مربية منزل	لا	لا	لا	لا	نعم	الأهل	نعم	لا	ربما	ربما	نعم	لا	لا	لا	لا	لا	ربما	لا	نعم	لا	لا	لا	لا	ربما	ربما	نعم	نعم	نعم	لا	لا	ربما	لا
أنثى	18-25 سنة	أعزب\عزباء	أكثر من 12000 جنيه مصري	ريف	جامعة بكالوريوس /دبلوم	شهادات عليا	جامعة بكالوريوس /دبلوم	مربية منزل	نعم	لا	ليس لدي شريك	لا	نعم	الطبيب	نعم	نعم	ربما	نعم	نعم	لا	لا	لا	لا	لا	نعم	لا	ربما	لا	لا	لا	لا	نعم	نعم	نعم	نعم	نعم	نعم	نعم	لا	لا
ذكر	26-35 سنة	أعزب\عزباء	6000-12000 جنيه مصري	ريف	شهادات عليا	جامعة بكالوريوس /دبلوم	ثانوي	عامل	نعم	لا	لا	لا	نعم	أخرى	نعم	نعم	ربما	ربما	نعم	لا	لا	لا	لا	لا	ربما	لا	لا	لا	لا	لا	لا	لا	نعم	نعم	نعم	نعم	نعم	نعم	لا	لا
ذكر	18-25 سنة	أعزب\عزباء	أقل من 6000 جنيه مصري	مدينة	جامعة بكالوريوس /دبلوم	جامعة بكالوريوس /دبلوم	ثانوي	طالب	نعم	لا	لا	لا	نعم	الإنترنت, التلفاز, الأهل, الأصدقاء, الصحف - الكتب - المجلات, الطبيب	نعم	نعم	نعم	ربما	نعم	لا	لا	لا	لا	لا	نعم	لا	ربما	لا	ربما	لا	ربما	ربما	نعم	نعم	نعم	نعم	نعم	نعم	ربما	لا
أنثى	18-25 سنة	أعزب\عزباء	6000-12000 جنيه مصري	مدينة	جامعة بكالوريوس /دبلوم	جامعة بكالوريوس /دبلوم	ثانوي	طالب	نعم	لا	ليس لدي شريك	لا	نعم	الإنترنت, المدرسة, الصحف - الكتب - المجلات, الطبيب	نعم	نعم	لا	ربما	نعم	لا	لا	لا	لا	لا	لا	لا	لا	لا	لا	لا	لا	لا	نعم	نعم	نعم	نعم	ربما	ربما	ربما	لا
أنثى	18-25 سنة	أعزب\عزباء	أكثر من 12000 جنيه مصري	مدينة	جامعة بكالوريوس /دبلوم	جامعة بكالوريوس /دبلوم	جامعة بكالوريوس /دبلوم	طالب	لا	لا	ليس لدي شريك	لا	نعم	الإنترنت, الأهل	نعم	نعم	نعم	ربما	نعم	لا	لا	لا	لا	لا	ربما	لا	لا	لا	لا	لا	ربما	لا	نعم	نعم	نعم	نعم	ربما	ربما	ربما	لا
ذكر	18-25 سنة	أعزب\عزباء	أقل من 6000 جنيه مصري	ريف	جامعة بكالوريوس /دبلوم	جامعة بكالوريوس /دبلوم	جامعة بكالوريوس /دبلوم	طالب	نعم	لا	ليس لدي شريك	لا	نعم	الإنترنت, التلفاز, المدرسة, الأهل, الأصدقاء, الصحف - الكتب - المجلات, الطبيب, أخرى	نعم	نعم	نعم	لا	نعم	لا	لا	لا	لا	لا	لا	لا	نعم	لا	لا	لا	لا	ربما	نعم	نعم	نعم	نعم	نعم	نعم	لا	لا
أنثى	18-25 سنة	أعزب\عزباء	6000-12000 جنيه مصري	مدينة	جامعة بكالوريوس /دبلوم	جامعة بكالوريوس /دبلوم	جامعة بكالوريوس /دبلوم	طالب	نعم	لا	ليس لدي شريك	لا	نعم	الإنترنت, التلفاز, المدرسة, الأهل, الأصدقاء, الصحف - الكتب - المجلات, الطبيب	نعم	ربما	لا	ربما	نعم	لا	نعم	لا	لا	لا	لا	لا	ربما	لا	لا	لا	لا	لا	نعم	نعم	نعم	نعم	نعم	نعم	لا	لا
أنثى	18-25 سنة	أعزب\عزباء	6000-12000 جنيه مصري	ريف	جامعة بكالوريوس /دبلوم	جامعة بكالوريوس /دبلوم	ثانوي	طالب	لا	نعم	ليس لدي شريك	لا	نعم	الإنترنت, التلفاز, المدرسة, الأهل, الأصدقاء, الصحف - الكتب - المجلات	نعم	ربما	لا	ربما	نعم	لا	لا	لا	لا	لا	ربما	لا	ربما	لا	لا	لا	لا	نعم	نعم	نعم	نعم	نعم	ربما	ربما	لا	لا
ذكر	18-25 سنة	أعزب\عزباء	أقل من 6000 جنيه مصري	مدينة	جامعة بكالوريوس /دبلوم	جامعة بكالوريوس /دبلوم	جامعة بكالوريوس /دبلوم	متقاعد	نعم	لا	ليس لدي شريك	لا	نعم	الطبيب	نعم	لا	ربما	لا	نعم	لا	لا	لا	لا	لا	لا	لا	نعم	لا	لا	لا	لا	نعم	نعم	نعم	نعم	نعم	نعم	نعم	لا	لا
أنثى	18-25 سنة	أعزب\عزباء	أكثر من 12000 جنيه مصري	مدينة	جامعة بكالوريوس /دبلوم	جامعة بكالوريوس /دبلوم	جامعة بكالوريوس /دبلوم	طالب	نعم	لا	ليس لدي شريك	لا	نعم	الإنترنت, الصحف - الكتب - المجلات, الطبيب	نعم	نعم	لا	نعم	نعم	لا	لا	لا	لا	لا	ربما	لا	ربما	لا	لا	لا	لا	ربما	نعم	نعم	نعم	نعم	ربما	ربما	ربما	لا
أنثى	18-25 سنة	أعزب\عزباء	6000-12000 جنيه مصري	مدينة	جامعة بكالوريوس /دبلوم	جامعة بكالوريوس /دبلوم	جامعة بكالوريوس /دبلوم	طالب	نعم	لا	ليس لدي شريك	لا	نعم	الإنترنت, التلفاز, الصحف - الكتب - المجلات, الطبيب	نعم	نعم	لا	ربما	نعم	ربما	لا	نعم	لا	لا	ربما	لا	ربما	ربما	ربما	لا	لا	ربما	نعم	نعم	نعم	نعم	ربما	لا	لا	لا
أنثى	18-25 سنة	أعزب\عزباء	أقل من 6000 جنيه مصري	ريف	جامعة بكالوريوس /دبلوم	ثانوي	ابتدائي	طالب	نعم	لا	ليس لدي شريك	لا	نعم	الإنترنت, الطبيب	نعم	نعم	لا	ربما	نعم	لا	لا	لا	لا	لا	ربما	لا	نعم	لا	ربما	لا	لا	لا	نعم	نعم	نعم	نعم	لا	ربما	ربما	لا
أنثى	26-35 سنة	متزوج/ة	6000-12000 جنيه مصري	مدينة	جامعة بكالوريوس /دبلوم	جامعة بكالوريوس /دبلوم	ثانوي	مربية منزل	لا	لا	لا	لا	نعم	الإنترنت, الأهل, الأصدقاء	ربما	نعم	نعم	نعم	نعم	نعم	نعم	نعم	نعم	نعم	نعم	نعم	نعم	نعم	نعم	نعم	نعم	نعم	لا	لا	نعم	لا	لا	لا	نعم	نعم
أنثى	18-25 سنة	أعزب\عزباء	6000-12000 جنيه مصري	مدينة	جامعة بكالوريوس /دبلوم	شهادات عليا	جامعة بكالوريوس /دبلوم	طالب	لا	لا	ليس لدي شريك	لا	نعم	أخرى	نعم	لا	ربما	ربما	نعم	لا	لا	لا	لا	لا	لا	لا	نعم	لا	لا	لا	لا	ربما	نعم	نعم	نعم	نعم	نعم	نعم	لا	لا
ذكر	18-25 سنة	أعزب\عزباء	6000-12000 جنيه مصري	ريف	جامعة بكالوريوس /دبلوم	جامعة بكالوريوس /دبلوم	جامعة بكالوريوس /دبلوم	طالب	نعم	لا	لا	لا	نعم	المدرسة, الأصدقاء, الصحف - الكتب - المجلات, الطبيب	نعم	نعم	لا	لا	لا	لا	لا	لا	لا	لا	لا	لا	نعم	لا	لا	لا	لا	لا	ربما	ربما	لا	نعم	ربما	ربما	ربما	لا
ذكر	26-35 سنة	متزوج/ة	6000-12000 جنيه مصري	مدينة	ثانوي	جامعة بكالوريوس /دبلوم	ثانوي	عامل	لا	لا	لا	لا	لا	أخرى	ربما	ربما	ربما	ربما	ربما	ربما	ربما	ربما	ربما	ربما	ربما	ربما	ربما	ربما	ربما	ربما	ربما	ربما	ربما	ربما	ربما	ربما	ربما	ربما	ربما	ربما
ذكر	18-25 سنة	أعزب\عزباء	أكثر من 12000 جنيه مصري	ريف	جامعة بكالوريوس /دبلوم	ثانوي	ثانوي	عاطل عن العمل	لا	لا	ليس لدي شريك	لا	نعم	الإنترنت, الأصدقاء	ربما	ربما	لا	لا	نعم	لا	لا	لا	لا	لا	لا	لا	ربما	لا	لا	لا	لا	ربما	نعم	نعم	نعم	نعم	نعم	نعم	لا	لا
أنثى	18-25 سنة	أعزب\عزباء	أقل من 6000 جنيه مصري	ريف	ثانوي	ابتدائي	جامعة بكالوريوس /دبلوم	عاطل عن العمل	لا	لا	ليس لدي شريك	لا	نعم	الإنترنت, التلفاز, المدرسة, الأهل, الأصدقاء, الصحف - الكتب - المجلات	نعم	لا	ربما	ربما	نعم	لا	لا	لا	لا	لا	ربما	لا	نعم	لا	ربما	لا	لا	لا	نعم	نعم	نعم	نعم	ربما	ربما	ربما	ربما
أنثى	18-25 سنة	أعزب\عزباء	6000-12000 جنيه مصري	مدينة	جامعة بكالوريوس /دبلوم	ثانوي	ثانوي	طالب	نعم	لا	ليس لدي شريك	لا	نعم	الطبيب	نعم	لا	ربما	لا	نعم	لا	لا	لا	لا	لا	لا	لا	ربما	لا	ربما	لا	لا	نعم	نعم	نعم	نعم	نعم	ربما	ربما	لا	لا
أنثى	18-25 سنة	أعزب\عزباء	أقل من 6000 جنيه مصري	مدينة	جامعة بكالوريوس /دبلوم	ابتدائي	ثانوي	طالب	نعم	لا	ليس لدي شريك	لا	نعم	الأصدقاء	نعم	لا	ربما	لا	نعم	لا	لا	لا	لا	لا	لا	نعم	ربما	نعم	ربما	لا	لا	ربما	نعم	نعم	نعم	نعم	نعم	نعم	لا	لا
ذكر	18-25 سنة	أعزب\عزباء	6000-12000 جنيه مصري	ريف	جامعة بكالوريوس /دبلوم	جامعة بكالوريوس /دبلوم	ثانوي	عاطل عن العمل	نعم	لا	ليس لدي شريك	لا	نعم	الإنترنت, التلفاز, المدرسة, الأهل, الصحف - الكتب - المجلات, الطبيب	نعم	نعم	لا	لا	نعم	لا	لا	لا	لا	لا	لا	لا	لا	لا	لا	لا	لا	نعم	نعم	نعم	نعم	نعم	نعم	نعم	لا	لا
أنثى	26-35 سنة	متزوج/ة	6000-12000 جنيه مصري	ريف	جامعة بكالوريوس /دبلوم	جامعة بكالوريوس /دبلوم	ابتدائي	عامل	لا	لا	لا	لا	نعم	الإنترنت	نعم	نعم	نعم	نعم	نعم	لا	لا	لا	لا	لا	نعم	لا	نعم	لا	نعم	لا	لا	لا	لا	نعم	نعم	نعم	لا	لا	لا	نعم
ذكر	36-50 سنة	متزوج/ة	6000-12000 جنيه مصري	ريف	جامعة بكالوريوس /دبلوم	جامعة بكالوريوس /دبلوم	ثانوي	عامل	لا	لا	لا	لا	نعم	أخرى	نعم	ربما	لا	ربما	نعم	لا	لا	لا	لا	ربما	ربما	لا	لا	لا	لا	لا	لا	ربما	نعم	نعم	نعم	نعم	ربما	لا	ربما	لا
ذكر	18-25 سنة	أعزب\عزباء	6000-12000 جنيه مصري	مدينة	جامعة بكالوريوس /دبلوم	جامعة بكالوريوس /دبلوم	جامعة بكالوريوس /دبلوم	طالب	نعم	لا	لا	لا	نعم	الإنترنت, المدرسة	ربما	ربما	ربما	ربما	نعم	لا	لا	لا	لا	لا	ربما	ربما	ربما	ربما	ربما	ربما	لا	ربما	نعم	نعم	نعم	نعم	ربما	لا	لا	لا
ذكر	18-25 سنة	أعزب\عزباء	أقل من 6000 جنيه مصري	ريف	جامعة بكالوريوس /دبلوم	جامعة بكالوريوس /دبلوم	جامعة بكالوريوس /دبلوم	عاطل عن العمل	لا	لا	لا	لا	لا	الإنترنت	نعم	نعم	نعم	نعم	لا	ربما	لا	لا	لا	لا	نعم	نعم	نعم	ربما	ربما	ربما	نعم	نعم	نعم	نعم	لا	لا	نعم	ربما	لا	لا
أنثى	51 سنة فأكثر	أعزب\عزباء	أكثر من 12000 جنيه مصري	مدينة	شهادات عليا	ثانوي	ابتدائي	متقاعد	لا	لا	لا	لا	نعم	الأصدقاء	نعم	ربما	لا	نعم	نعم	لا	لا	لا	لا	ربما	لا	لا	لا	لا	لا	لا	لا	نعم	نعم	نعم	نعم	نعم	ربما	ربما	لا	لا
أنثى	18-25 سنة	أعزب\عزباء	أقل من 6000 جنيه مصري	مدينة	جامعة بكالوريوس /دبلوم	ثانوي	ثانوي	طالب	نعم	لا	ليس لدي شريك	لا	نعم	المدرسة, الصحف - الكتب - المجلات, الطبيب	نعم	نعم	نعم	لا	نعم	لا	لا	لا	لا	لا	لا	لا	نعم	لا	لا	لا	لا	نعم	نعم	نعم	نعم	نعم	نعم	نعم	لا	لا
ذكر	18-25 سنة	أعزب\عزباء	أكثر من 12000 جنيه مصري	مدينة	جامعة بكالوريوس /دبلوم	جامعة بكالوريوس /دبلوم	جامعة بكالوريوس /دبلوم	طالب	لا	لا	ليس لدي شريك	لا	نعم	الصحف - الكتب - المجلات	نعم	لا	لا	لا	نعم	لا	لا	لا	لا	لا	لا	لا	لا	لا	لا	لا	لا	لا	نعم	نعم	نعم	نعم	ربما	ربما	لا	لا
أنثى	18-25 سنة	أعزب\عزباء	6000-12000 جنيه مصري	ريف	جامعة بكالوريوس /دبلوم	جامعة بكالوريوس /دبلوم	جامعة بكالوريوس /دبلوم	طالب	نعم	لا	ليس لدي شريك	لا	نعم	الطبيب	نعم	نعم	نعم	لا	نعم	نعم	لا	لا	لا	لا	نعم	لا	نعم	لا	لا	لا	لا	نعم	نعم	نعم	نعم	نعم	نعم	نعم	لا	لا
ذكر	18-25 سنة	أعزب\عزباء	6000-12000 جنيه مصري	ريف	جامعة بكالوريوس /دبلوم	ثانوي	ثانوي	طالب	لا	لا	ليس لدي شريك	لا	نعم	الإنترنت, التلفاز, المدرسة, الأهل	ربما	لا	ربما	ربما	نعم	لا	لا	ربما	لا	ربما	ربما	ربما	ربما	لا	ربما	ربما	لا	نعم	لا	لا	ربما	ربما	لا	لا	لا	ربما
أنثى	18-25 سنة	أعزب\عزباء	أقل من 6000 جنيه مصري	مدينة	جامعة بكالوريوس /دبلوم	جامعة بكالوريوس /دبلوم	جامعة بكالوريوس /دبلوم	طالب	نعم	لا	لا	لا	نعم	الإنترنت, الأهل, الصحف - الكتب - المجلات, الطبيب	نعم	نعم	لا	ربما	ربما	لا	لا	لا	لا	لا	نعم	لا	لا	لا	لا	لا	لا	ربما	نعم	نعم	نعم	نعم	ربما	ربما	لا	لا
أنثى	18-25 سنة	أعزب\عزباء	أقل من 6000 جنيه مصري	ريف	جامعة بكالوريوس /دبلوم	ثانوي	ابتدائي	طالب	نعم	لا	ليس لدي شريك	لا	نعم	الصحف - الكتب - المجلات, الطبيب	نعم	نعم	لا	ربما	نعم	لا	لا	لا	لا	لا	ربما	لا	لا	لا	نعم	لا	لا	لا	نعم	نعم	نعم	نعم	ربما	ربما	لا	لا
ذكر	18-25 سنة	أعزب\عزباء	6000-12000 جنيه مصري	مدينة	جامعة بكالوريوس /دبلوم	شهادات عليا	جامعة بكالوريوس /دبلوم	طالب	نعم	لا	لا	لا	نعم	الإنترنت, التلفاز, الطبيب, أخرى	نعم	نعم	ربما	نعم	نعم	لا	لا	لا	لا	لا	لا	لا	نعم	لا	لا	لا	لا	ربما	نعم	نعم	نعم	نعم	نعم	نعم	لا	لا
ذكر	18-25 سنة	أعزب\عزباء	أكثر من 12000 جنيه مصري	ريف	شهادات عليا	شهادات عليا	ثانوي	طالب	نعم	لا	ليس لدي شريك	لا	نعم	الإنترنت, المدرسة, الصحف - الكتب - المجلات, الطبيب	نعم	ربما	لا	ربما	نعم	لا	لا	لا	لا	لا	لا	لا	ربما	لا	ربما	لا	لا	ربما	نعم	نعم	ربما	ربما	ربما	نعم	لا	لا
ذكر	18-25 سنة	أعزب\عزباء	6000-12000 جنيه مصري	ريف	جامعة بكالوريوس /دبلوم	ثانوي	جامعة بكالوريوس /دبلوم	طالب	نعم	لا	ليس لدي شريك	لا	نعم	الصحف - الكتب - المجلات	نعم	نعم	لا	نعم	نعم	لا	لا	لا	لا	لا	ربما	لا	لا	لا	ربما	لا	لا	نعم	نعم	نعم	نعم	نعم	نعم	نعم	لا	لا
ذكر	18-25 سنة	أعزب\عزباء	أقل من 6000 جنيه مصري	ريف	جامعة بكالوريوس /دبلوم	جامعة بكالوريوس /دبلوم	ابتدائي	طالب	نعم	لا	ليس لدي شريك	لا	نعم	الطبيب	نعم	نعم	نعم	لا	نعم	لا	لا	لا	لا	لا	لا	لا	نعم	لا	لا	لا	لا	ربما	نعم	نعم	نعم	نعم	لا	لا	نعم	لا
أنثى	18-25 سنة	أعزب\عزباء	6000-12000 جنيه مصري	مدينة	جامعة بكالوريوس /دبلوم	جامعة بكالوريوس /دبلوم	جامعة بكالوريوس /دبلوم	طالب	نعم	لا	ليس لدي شريك	لا	نعم	الإنترنت, الطبيب, أخرى	نعم	نعم	نعم	نعم	نعم	لا	لا	لا	لا	لا	نعم	لا	ربما	ربما	لا	لا	لا	نعم	نعم	نعم	نعم	نعم	ربما	ربما	لا	لا
ذكر	18-25 سنة	أعزب\عزباء	6000-12000 جنيه مصري	ريف	جامعة بكالوريوس /دبلوم	جامعة بكالوريوس /دبلوم	جامعة بكالوريوس /دبلوم	طالب	نعم	لا	ليس لدي شريك	لا	نعم	الإنترنت, الأهل, الأصدقاء, الطبيب	لا	ربما	ربما	لا	نعم	لا	لا	لا	لا	ربما	لا	لا	لا	لا	ربما	لا	لا	ربما	نعم	نعم	نعم	نعم	نعم	نعم	لا	لا
أنثى	18-25 سنة	أعزب\عزباء	6000-12000 جنيه مصري	مدينة	جامعة بكالوريوس /دبلوم	ثانوي	ثانوي	طالب	نعم	لا	ليس لدي شريك	لا	نعم	الأهل	نعم	ربما	لا	ربما	نعم	لا	لا	لا	لا	لا	ربما	لا	ربما	لا	ربما	لا	لا	لا	نعم	نعم	ربما	نعم	ربما	ربما	ربما	لا
أنثى	18-25 سنة	أعزب\عزباء	6000-12000 جنيه مصري	مدينة	جامعة بكالوريوس /دبلوم	جامعة بكالوريوس /دبلوم	جامعة بكالوريوس /دبلوم	طالب	نعم	لا	لا	لا	نعم	الإنترنت, الأهل, الصحف - الكتب - المجلات, الطبيب	نعم	نعم	ربما	ربما	نعم	لا	لا	لا	لا	لا	لا	لا	نعم	لا	ربما	لا	لا	لا	نعم	نعم	نعم	نعم	ربما	ربما	لا	لا
ذكر	18-25 سنة	أعزب\عزباء	6000-12000 جنيه مصري	مدينة	جامعة بكالوريوس /دبلوم	ثانوي	ثانوي	عامل	لا	لا	لا	لا	نعم	الأصدقاء	نعم	لا	لا	لا	لا	لا	لا	لا	لا	لا	لا	لا	نعم	لا	لا	لا	لا	ربما	نعم	نعم	نعم	نعم	نعم	نعم	لا	لا
ذكر	18-25 سنة	أعزب\عزباء	أقل من 6000 جنيه مصري	ريف	جامعة بكالوريوس /دبلوم	ابتدائي	ثانوي	طالب	نعم	لا	ليس لدي شريك	لا	نعم	أخرى	نعم	نعم	نعم	نعم	نعم	لا	لا	لا	لا	لا	ربما	لا	نعم	لا	لا	لا	لا	نعم	نعم	نعم	نعم	نعم	نعم	نعم	لا	لا
ذكر	18-25 سنة	أعزب\عزباء	أقل من 6000 جنيه مصري	مدينة	جامعة بكالوريوس /دبلوم	شهادات عليا	شهادات عليا	مربية منزل	نعم	لا	ليس لدي شريك	لا	لا	أخرى	لا	نعم	نعم	نعم	لا	لا	لا	لا	لا	لا	لا	لا	نعم	لا	لا	لا	لا	لا	ربما	ربما	ربما	ربما	لا	لا	لا	لا
ذكر	18-25 سنة	أعزب\عزباء	6000-12000 جنيه مصري	ريف	شهادات عليا	ثانوي	ثانوي	عاطل عن العمل	نعم	لا	لا	لا	نعم	الصحف - الكتب - المجلات	نعم	لا	لا	لا	نعم	لا	لا	لا	لا	لا	لا	لا	لا	لا	لا	لا	لا	لا	نعم	نعم	نعم	نعم	لا	لا	نعم	ربما
ذكر	18-25 سنة	أعزب\عزباء	6000-12000 جنيه مصري	مدينة	جامعة بكالوريوس /دبلوم	ثانوي	ثانوي	طالب	نعم	لا	لا	لا	نعم	الصحف - الكتب - المجلات, الطبيب, أخرى	نعم	ربما	ربما	ربما	ربما	لا	لا	لا	لا	لا	ربما	ربما	ربما	ربما	ربما	ربما	ربما	ربما	لا	نعم	نعم	نعم	لا	لا	نعم	نعم
أنثى	18-25 سنة	أعزب\عزباء	أقل من 6000 جنيه مصري	ريف	جامعة بكالوريوس /دبلوم	ثانوي	ثانوي	طالب	نعم	لا	لا	لا	نعم	الأهل	نعم	نعم	ربما	لا	نعم	لا	لا	لا	لا	لا	نعم	لا	لا	لا	لا	لا	لا	لا	نعم	نعم	نعم	نعم	ربما	ربما	لا	لا
ذكر	18-25 سنة	أعزب\عزباء	6000-12000 جنيه مصري	ريف	جامعة بكالوريوس /دبلوم	شهادات عليا	جامعة بكالوريوس /دبلوم	طالب	نعم	لا	ليس لدي شريك	لا	نعم	الإنترنت, الأهل, الأصدقاء, الصحف - الكتب - المجلات, الطبيب	نعم	نعم	لا	ربما	نعم	لا	لا	لا	لا	لا	لا	لا	لا	لا	لا	لا	لا	نعم	نعم	نعم	نعم	نعم	نعم	نعم	لا	لا
أنثى	18-25 سنة	أعزب\عزباء	6000-12000 جنيه مصري	مدينة	جامعة بكالوريوس /دبلوم	شهادات عليا	جامعة بكالوريوس /دبلوم	طالب	نعم	لا	ليس لدي شريك	لا	نعم	الإنترنت, المدرسة, الأهل, الصحف - الكتب - المجلات, الطبيب	نعم	لا	نعم	ربما	نعم	لا	لا	لا	لا	لا	لا	لا	ربما	لا	لا	لا	لا	نعم	نعم	نعم	نعم	نعم	ربما	نعم	لا	لا
ذكر	18-25 سنة	أعزب\عزباء	6000-12000 جنيه مصري	ريف	جامعة بكالوريوس /دبلوم	ثانوي	ثانوي	طالب	لا	نعم	ليس لدي شريك	نعم	نعم	الإنترنت	لا	ربما	لا	ربما	نعم	لا	لا	لا	لا	لا	ربما	لا	لا	ربما	لا	ربما	لا	نعم	نعم	نعم	نعم	نعم	لا	لا	لا	لا
أنثى	18-25 سنة	أعزب\عزباء	6000-12000 جنيه مصري	ريف	جامعة بكالوريوس /دبلوم	ثانوي	ابتدائي	طالب	لا	لا	ليس لدي شريك	لا	نعم	الإنترنت	نعم	لا	لا	لا	نعم	لا	لا	لا	لا	لا	لا	لا	ربما	لا	لا	لا	لا	لا	نعم	نعم	نعم	نعم	ربما	ربما	ربما	لا
ذكر	18-25 سنة	أعزب\عزباء	6000-12000 جنيه مصري	ريف	جامعة بكالوريوس /دبلوم	جامعة بكالوريوس /دبلوم	جامعة بكالوريوس /دبلوم	عامل	نعم	لا	لا	لا	نعم	الصحف - الكتب - المجلات, الطبيب	نعم	نعم	ربما	نعم	نعم	لا	لا	لا	لا	لا	ربما	لا	لا	لا	لا	لا	لا	نعم	نعم	نعم	نعم	نعم	ربما	نعم	لا	لا
أنثى	18-25 سنة	أعزب\عزباء	أقل من 6000 جنيه مصري	مدينة	ثانوي	جامعة بكالوريوس /دبلوم	جامعة بكالوريوس /دبلوم	طالب	نعم	لا	ليس لدي شريك	لا	نعم	الإنترنت, الصحف - الكتب - المجلات, الطبيب	نعم	نعم	نعم	ربما	نعم	لا	لا	لا	لا	لا	لا	لا	ربما	لا	ربما	لا	ربما	ربما	نعم	نعم	نعم	نعم	نعم	ربما	لا	لا
أنثى	18-25 سنة	أعزب\عزباء	أقل من 6000 جنيه مصري	ريف	جامعة بكالوريوس /دبلوم	ثانوي	جامعة بكالوريوس /دبلوم	طالب	نعم	لا	ليس لدي شريك	لا	نعم	الأهل, الصحف - الكتب - المجلات, أخرى	نعم	نعم	ربما	ربما	نعم	لا	لا	لا	لا	لا	لا	لا	نعم	لا	ربما	لا	لا	ربما	نعم	نعم	نعم	نعم	لا	لا	ربما	لا
ذكر	18-25 سنة	أعزب\عزباء	أكثر من 12000 جنيه مصري	ريف	جامعة بكالوريوس /دبلوم	ثانوي	ثانوي	طالب	نعم	لا	ليس لدي شريك	لا	نعم	الإنترنت	نعم	لا	ربما	لا	نعم	لا	لا	لا	لا	لا	نعم	لا	نعم	لا	ربما	لا	لا	لا	ربما	نعم	نعم	نعم	لا	لا	نعم	لا
أنثى	18-25 سنة	أعزب\عزباء	6000-12000 جنيه مصري	ريف	جامعة بكالوريوس /دبلوم	ثانوي	جامعة بكالوريوس /دبلوم	عامل	نعم	لا	ليس لدي شريك	لا	نعم	أخرى	نعم	لا	نعم	لا	نعم	لا	لا	لا	لا	لا	لا	لا	نعم	لا	لا	لا	لا	لا	نعم	نعم	نعم	نعم	نعم	نعم	لا	لا
أنثى	18-25 سنة	أعزب\عزباء	أكثر من 12000 جنيه مصري	مدينة	جامعة بكالوريوس /دبلوم	جامعة بكالوريوس /دبلوم	جامعة بكالوريوس /دبلوم	طالب	لا	لا	لا	لا	نعم	الإنترنت	نعم	نعم	ربما	لا	نعم	لا	لا	لا	لا	لا	ربما	لا	نعم	لا	ربما	لا	لا	ربما	نعم	نعم	نعم	نعم	ربما	ربما	لا	لا
أنثى	18-25 سنة	متزوج/ة	أكثر من 12000 جنيه مصري	ريف	جامعة بكالوريوس /دبلوم	جامعة بكالوريوس /دبلوم	ثانوي	طالب	نعم	لا	لا	لا	نعم	الإنترنت, الأهل, الأصدقاء	نعم	ربما	لا	نعم	لا	لا	لا	لا	لا	لا	لا	لا	لا	لا	لا	لا	لا	ربما	نعم	نعم	نعم	نعم	نعم	نعم	لا	لا
أنثى	18-25 سنة	أعزب\عزباء	6000-12000 جنيه مصري	مدينة	جامعة بكالوريوس /دبلوم	جامعة بكالوريوس /دبلوم	ثانوي	طالب	لا	نعم	ليس لدي شريك	لا	نعم	الأهل	نعم	نعم	ربما	نعم	نعم	لا	لا	لا	لا	لا	نعم	ربما	ربما	ربما	لا	ربما	لا	ربما	نعم	نعم	نعم	نعم	نعم	نعم	لا	لا
ذكر	18-25 سنة	أعزب\عزباء	أقل من 6000 جنيه مصري	ريف	جامعة بكالوريوس /دبلوم	ثانوي	جامعة بكالوريوس /دبلوم	عامل	نعم	لا	ليس لدي شريك	لا	نعم	الإنترنت	ربما	لا	لا	لا	نعم	لا	لا	ربما	لا	لا	لا	لا	لا	لا	لا	لا	لا	نعم	نعم	نعم	نعم	نعم	نعم	ربما	ربما	لا
ذكر	18-25 سنة	أعزب\عزباء	6000-12000 جنيه مصري	ريف	شهادات عليا	ثانوي	جامعة بكالوريوس /دبلوم	طالب	نعم	لا	ليس لدي شريك	لا	نعم	الإنترنت	نعم	نعم	نعم	نعم	نعم	لا	لا	لا	لا	لا	ربما	لا	ربما	لا	لا	لا	لا	ربما	نعم	نعم	نعم	نعم	لا	لا	ربما	لا
ذكر	18-25 سنة	أعزب\عزباء	أكثر من 12000 جنيه مصري	مدينة	جامعة بكالوريوس /دبلوم	شهادات عليا	جامعة بكالوريوس /دبلوم	طالب	نعم	لا	ليس لدي شريك	لا	نعم	الطبيب	نعم	نعم	ربما	لا	لا	لا	لا	لا	لا	لا	نعم	لا	نعم	لا	لا	لا	لا	لا	نعم	نعم	نعم	نعم	نعم	نعم	لا	لا
أنثى	18-25 سنة	أعزب\عزباء	أقل من 6000 جنيه مصري	ريف	جامعة بكالوريوس /دبلوم	ابتدائي	جامعة بكالوريوس /دبلوم	طالب	نعم	لا	لا	لا	لا	الإنترنت, الصحف - الكتب - المجلات, الطبيب	نعم	نعم	لا	نعم	نعم	لا	لا	لا	لا	لا	لا	لا	ربما	لا	لا	لا	لا	ربما	نعم	نعم	نعم	نعم	نعم	نعم	لا	لا
ذكر	18-25 سنة	أعزب\عزباء	أقل من 6000 جنيه مصري	ريف	جامعة بكالوريوس /دبلوم	جامعة بكالوريوس /دبلوم	ثانوي	طالب	نعم	لا	لا	لا	نعم	الطبيب	نعم	نعم	ربما	لا	نعم	لا	لا	لا	لا	لا	لا	لا	لا	لا	لا	لا	لا	نعم	نعم	نعم	نعم	نعم	لا	لا	ربما	ربما

## Sheet: Sheet1
vitiligo affects the skin “YES”	Vitiligo is a disease of the immune system“YES”	vitiligo affects the social life of patients “YES”	Vitiligo is more prevalent and exaggerated with exposure to psychological stress“YES”	you think there is a lack of awareness regarding vitiligo and its treatment “YES”	vitiligo Is contagious “NO”	vitiligo is a infectious disease “NO”	vitiligo Is transmitted through touching and sharing objects with the patient “NO”	Vitiligo contagious by sharing things“NO”	Vitiligo caused by lack of hygiene“NO”	vitiligo affects internal organs “NO”	Vitiligo is associated with the habitual intake of certainfoods“NO”	Vitiligo is a hereditary disease“NO”	vitiligo Is caused by contaminated foods “NO”	vitiligo causes skin cancer “NO”	vitiligo Is triggered by magic or witchery “NO”	vitiligo leads to death “NO”	There is a treatment for vitiligo“YES”	Knowledge	I would hire a vitiligo patient	I would shake hands with a vitiligo patient	I would become a friend with a vitiligo patient	I would eat food prepared by a vitiligo patient	I would marry a vitiligo patient	I would marry a family member who has vitiligo	My intimate relationship would be affected by my partners’ vitiligo diagnosis	I would want to divorce if my partner got diagnosed with vitiligo	Attitude
1	1	1	1	1	1	1	1	1	1	1	1	1	1	1	1	1	1	18	1	1	1	1	1	1	1	1	8
1	1	1	1	1	1	1	1	1	1	0	1	0	1	1	1	1	0	15	0	1	1	1	-1	-1	0	0	1
1	1	0	0	1	1	1	1	1	0	0	1	0	1	0	1	0	1	11	1	1	1	1	1	1	0	0	6
1	1	1	0	1	0	1	0	0	0	0	0	0	0	0	1	1	0	7	0	0	1	-1	-1	-1	0	1	-1
1	0	0	0	1	1	1	1	1	1	1	1	0	1	1	1	1	0	13	1	1	1	1	1	1	1	1	8
0	0	0	0	0	0	0	0	0	0	0	0	0	0	0	0	0	0	0	-1	0	1	0	0	0	0	0	0
1	1	1	0	1	1	1	1	1	1	0	1	0	1	1	1	1	1	15	1	1	1	1	0	0	0	1	5
1	0	0	0	1	1	1	1	1	1	1	1	0	1	0	1	1	0	12	1	1	1	1	1	1	1	1	8
1	1	0	1	1	0	1	0	1	0	1	1	1	1	1	1	1	1	14	1	1	1	1	1	1	1	1	8
0	1	1	1	1	1	1	1	1	1	1	1	1	1	0	1	1	1	16	1	1	0	1	0	0	0	1	4
1	1	1	0	1	0	1	0	0	1	0	0	0	0	0	1	1	0	8	0	0	0	0	-1	-1	1	1	0
0	1	0	0	1	1	1	1	1	1	0	1	0	1	1	0	1	0	11	1	1	1	1	1	1	1	1	8
1	0	0	0	0	0	0	0	0	0	0	0	0	1	0	0	0	0	2	-1	-1	-1	-1	-1	-1	1	1	-4
1	1	1	0	1	1	1	1	1	1	0	1	1	1	1	1	1	0	15	1	1	1	1	0	0	0	1	5
1	0	0	0	1	1	1	1	1	1	0	1	0	1	0	0	1	0	10	1	1	1	1	0	0	1	1	6
1	0	1	1	1	1	1	1	1	1	0	0	0	0	1	1	1	0	12	0	1	1	1	1	1	1	1	7
1	1	0	0	1	1	1	1	1	1	0	1	0	1	1	1	1	0	13	1	1	1	1	1	0	0	1	6
1	0	1	0	1	1	1	1	1	0	0	0	0	0	1	1	1	0	10	1	1	1	1	0	0	-1	1	4
0	0	0	0	0	0	0	0	0	0	0	0	0	0	0	0	0	0	0	0	0	0	0	0	0	0	0	0
1	0	0	0	1	1	1	1	1	1	1	0	0	0	0	1	1	1	11	1	1	1	1	1	1	1	1	8
1	1	0	1	1	1	1	1	1	1	1	1	1	1	1	1	1	1	17	1	1	1	1	0	0	1	1	6
1	1	0	0	0	1	1	1	1	1	1	1	0	1	1	1	1	0	13	1	1	1	1	0	1	1	1	7
1	0	0	0	1	1	1	1	1	1	1	1	1	1	1	1	1	1	15	1	1	1	1	1	1	1	1	8
1	1	0	0	0	1	1	1	1	1	0	0	0	1	0	1	1	0	10	1	1	1	1	1	1	0	1	7
1	0	0	0	0	0	0	0	0	0	0	0	0	0	0	0	0	0	1	1	1	1	1	-1	-1	0	1	3
1	1	0	0	1	1	1	1	1	0	0	0	0	0	0	1	1	0	9	1	1	1	1	1	1	1	1	8
1	1	0	0	1	1	1	1	1	1	1	1	0	1	1	1	1	0	14	1	1	1	1	1	1	1	1	8
0	0	1	0	1	0	1	0	1	0	0	0	0	0	1	1	1	0	7	1	1	1	0	0	0	0	1	4
1	0	0	1	1	0	0	0	0	0	0	0	0	0	0	1	1	1	6	0	-1	1	-1	-1	-1	-1	0	-4
1	0	0	0	1	1	0	1	1	1	0	1	0	0	0	1	1	0	9	1	1	1	1	0	0	0	1	5
1	0	0	1	1	1	1	1	1	1	1	1	1	1	1	1	1	0	15	1	1	1	1	1	1	1	1	8
1	0	0	0	1	1	1	1	1	1	1	1	0	1	1	1	1	0	13	1	1	1	1	1	1	1	1	8
1	0	0	0	1	1	1	1	1	0	1	0	0	0	0	1	1	0	9	1	1	1	1	1	1	1	1	8
1	1	0	0	1	1	1	1	1	1	1	1	1	1	1	1	1	0	15	1	1	1	1	1	1	1	1	8
0	0	0	0	0	0	0	0	0	1	0	0	0	0	0	0	0	1	2	0	0	0	0	-1	-1	0	0	-2
1	0	1	0	1	1	1	1	1	1	0	0	1	0	0	1	1	1	12	-1	-1	-1	-1	-1	-1	0	1	-5
1	1	1	1	0	1	1	1	1	1	0	1	1	1	1	1	1	1	16	1	1	1	1	-1	-1	0	1	3
1	1	0	0	1	1	1	1	1	1	0	1	0	1	0	1	0	0	11	1	1	1	1	0	0	1	1	6
1	1	0	1	0	1	1	1	1	1	1	1	1	1	1	1	1	0	15	1	1	1	1	0	0	1	1	6
1	1	0	0	1	1	1	1	1	1	0	1	0	1	1	1	1	0	13	1	1	1	1	0	-1	1	1	5
0	0	0	0	0	0	0	0	0	0	0	0	0	0	0	0	0	0	0	0	1	0	0	0	0	0	0	1
1	0	0	1	1	1	1	1	1	1	1	1	1	1	0	1	1	0	14	1	1	1	1	-1	-1	1	1	4
1	1	0	1	1	1	1	1	1	1	1	1	0	1	0	1	1	1	15	1	1	1	1	1	1	1	0	7
1	1	0	1	1	1	1	1	1	1	1	1	0	1	1	1	1	1	16	1	1	1	1	0	0	1	1	6
0	0	1	0	1	1	1	1	1	1	0	1	1	1	0	1	1	1	13	1	1	1	1	1	1	1	1	8
0	0	0	0	1	1	1	1	1	1	1	1	0	1	1	1	1	1	13	1	1	1	1	0	0	1	1	6
1	0	1	0	1	1	1	1	1	1	1	1	0	1	0	1	1	0	13	0	1	0	1	-1	-1	-1	1	0
1	0	1	0	1	1	1	1	1	1	0	1	0	1	0	1	0	0	11	1	1	1	1	0	0	0	1	5
1	1	0	1	0	1	1	1	1	1	1	1	0	1	1	1	1	0	14	1	1	1	1	1	1	1	1	8
0	0	0	0	1	1	0	1	0	1	0	0	0	0	0	0	1	0	5	1	1	1	0	0	1	1	1	6
0	0	0	0	1	1	1	1	1	1	0	0	1	0	0	1	1	1	10	1	1	1	1	0	0	1	1	6
1	1	0	0	1	1	1	1	1	1	1	1	0	1	1	1	1	1	15	1	1	1	1	0	1	1	1	7
1	1	0	1	1	1	1	1	1	1	1	1	0	1	0	1	1	0	14	1	1	1	1	1	1	1	1	8
1	1	0	0	1	1	1	1	1	1	0	1	0	1	0	1	1	0	12	1	1	1	1	1	1	1	1	8
1	0	1	0	1	1	1	1	1	1	1	1	0	1	0	0	1	0	12	1	1	1	1	0	0	1	1	6
1	0	0	0	1	1	1	1	1	1	0	1	0	1	1	1	1	0	12	1	1	1	1	1	1	1	1	8
1	1	1	0	1	1	1	1	1	1	0	1	1	1	1	1	1	1	16	1	1	1	1	-1	-1	1	1	4
1	1	1	1	1	1	1	1	1	1	1	1	0	1	1	1	1	0	16	1	1	1	1	1	1	1	1	8
1	1	0	0	1	1	1	1	1	1	0	1	0	1	1	1	1	0	13	1	1	1	1	1	1	1	1	8
1	1	1	1	1	1	1	1	1	1	0	0	1	1	1	1	1	0	15	1	1	1	1	1	1	1	1	8
1	1	0	1	1	1	1	1	1	1	0	1	1	1	0	1	1	0	14	1	1	1	1	-1	-1	1	1	4
1	1	0	1	1	1	1	1	1	1	1	1	0	1	1	0	1	0	14	1	1	1	1	1	1	1	1	8
0	0	1	0	0	0	0	0	0	0	0	0	0	0	0	0	0	0	1	0	0	0	0	-1	0	0	1	0
1	0	0	0	0	1	1	0	1	1	0	0	1	1	0	1	1	0	9	1	1	1	1	1	1	1	1	8
1	1	1	0	1	1	1	1	1	1	1	1	1	1	1	1	1	0	16	1	1	1	1	0	0	1	1	6
1	0	0	0	0	1	1	1	1	1	1	1	1	1	1	1	1	0	13	1	1	1	1	1	1	1	1	8
1	1	0	0	1	1	1	1	1	1	1	1	1	1	0	1	1	0	14	1	1	1	1	1	1	1	1	8
1	1	0	0	1	1	1	1	1	1	0	1	1	1	1	1	1	0	14	1	1	1	1	1	1	1	1	8
1	1	1	1	1	1	1	1	1	1	1	1	1	1	0	1	0	0	15	1	1	1	1	1	1	1	1	8
1	0	0	1	1	1	1	1	1	1	1	1	1	1	1	1	1	0	15	1	1	1	1	1	1	1	1	8
0	0	0	0	1	1	1	1	1	1	0	1	1	1	0	1	1	0	11	1	1	1	1	0	0	1	1	6
1	0	0	0	0	1	1	1	1	1	1	1	0	1	0	1	1	0	11	1	1	1	1	1	1	1	1	8
1	1	1	1	1	1	1	1	1	1	0	1	0	1	0	1	1	0	14	1	0	1	0	-1	-1	0	1	1
0	1	0	0	0	1	1	1	1	1	0	1	0	1	1	1	1	0	11	1	1	1	1	0	1	1	1	7
1	1	0	1	1	1	1	1	1	1	1	1	0	1	1	1	1	0	15	1	1	1	1	0	0	1	0	5
1	1	0	1	1	1	1	1	1	1	1	1	1	1	1	1	1	0	16	1	1	1	1	1	1	1	1	8
1	1	0	1	1	1	1	1	1	1	0	1	0	1	0	1	1	0	13	1	1	1	1	1	1	1	1	8
1	1	1	1	1	1	1	1	1	1	0	1	0	1	0	1	1	0	14	0	1	1	1	0	0	0	1	4
1	1	0	1	1	1	1	1	1	1	1	1	0	1	1	1	1	0	15	1	1	1	1	0	0	1	1	6
1	1	1	1	0	1	1	1	1	1	1	1	0	1	1	0	1	0	14	0	1	1	1	-1	-1	1	1	3
0	0	0	0	0	0	0	0	0	0	0	0	0	0	0	0	0	0	0	0	0	1	0	0	0	0	0	1
1	1	0	1	1	1	1	1	1	1	0	1	0	1	1	1	1	0	14	1	1	1	1	1	1	1	1	8
1	1	0	0	1	1	1	1	1	1	1	0	1	1	1	1	1	0	14	1	1	1	1	0	1	1	1	7
1	1	0	0	1	1	1	1	1	1	0	1	0	1	1	1	1	0	13	1	1	1	1	1	1	1	1	8
1	1	1	0	1	1	1	0	1	0	0	1	0	0	0	1	1	1	11	1	1	1	1	-1	-1	0	0	2
0	1	0	1	1	1	1	1	1	1	1	1	0	1	1	1	1	0	14	1	1	1	1	1	1	1	1	8
0	1	1	0	1	1	1	1	1	1	0	1	0	1	1	0	1	0	12	1	1	1	1	0	0	1	1	6
1	1	1	1	1	1	1	1	1	1	1	1	0	1	0	1	0	0	14	1	1	1	1	-1	0	0	1	4
1	0	0	0	1	1	1	1	1	1	1	1	1	1	1	1	1	0	14	1	1	1	1	0	0	1	1	6
1	1	0	1	1	1	1	1	1	1	1	1	0	1	1	1	1	1	16	1	1	1	1	0	0	1	1	6
1	1	1	0	1	1	1	1	1	1	0	0	0	1	0	1	1	1	13	0	-1	-1	-1	0	1	1	1	0
1	1	1	1	1	1	1	1	1	1	1	1	0	1	1	1	1	1	17	1	1	1	1	1	1	1	1	8
1	1	0	1	1	1	1	1	1	1	1	1	0	1	1	1	1	1	16	1	1	1	1	1	1	1	1	8
1	1	0	1	1	1	1	1	1	1	1	1	0	1	1	1	1	1	16	1	1	1	1	1	1	1	1	8
1	0	0	0	1	1	1	1	1	1	1	1	0	1	1	1	1	0	13	1	1	1	1	0	0	0	1	5
1	1	0	0	1	1	1	1	1	1	0	1	1	1	0	1	1	0	13	1	1	1	1	0	1	1	1	7
1	1	0	0	0	1	1	1	1	1	0	1	1	1	1	1	1	0	13	1	1	1	1	1	1	1	1	8
1	1	0	0	1	1	1	1	1	1	0	0	0	1	1	1	1	0	12	1	1	1	1	0	0	0	0	4
1	0	1	0	1	1	1	1	1	1	0	1	0	1	0	1	1	0	12	1	1	1	1	1	1	1	1	8
1	1	0	1	1	1	1	1	1	1	1	1	0	1	1	0	1	1	15	0	1	1	1	0	0	1	1	5
1	1	0	0	1	1	1	1	1	1	1	1	0	1	0	1	1	0	13	1	1	1	1	1	1	1	1	8
0	1	0	1	1	1	1	1	1	1	0	0	0	1	1	0	1	0	11	1	1	1	1	1	1	1	1	8
1	0	1	0	1	1	1	1	1	1	0	1	0	1	1	1	1	0	13	1	1	1	1	0	0	1	1	6
1	1	0	0	0	1	1	1	1	1	1	1	0	1	1	1	1	1	14	1	1	1	1	1	1	1	1	8
[truncated: 1,433 more rows]
